# Supplementary material
Source: Research Square preprint supplement (doi:10.21203/rs.3.rs-9567597/v1)
Supplement: Supplementary file 1 [file 2b976afe927ed66d8c922891.xlsx]

## Sheet: AHP_nivel_0
		PROJETOS-ÂNCORA					ÁREAS DE INTERVENÇÃO & OBJETIVOS ESTRATÉGICOS
			Economia			Património natural			Território, centralidade e marca			Inclusão social			+ Qualidade de vida
		Alternativa 1	6	3	3.33333	0.333333	2	1.66667	1	1	1	1.33333	0.666667	1.66667	1	1	3				28	1.47097
		Alternativa 2	4.75	0.75	1.5	5	2.5	2.5	0.25	1	1	1.25	0.5	0.75	0.75	0.75	4				27.25	1.43157
		Alternativa 3	6	3.33333	5.33333	0.333333	4	1.33333	0.333333	0.666667	2	0.666667		1.66667	0.666667	0.666667	1				28	1.47097
		Alternativa 4	2.66667	4.66667	2.33333	0.333333	2.66667				0.333333	2.66667	0.666667	3.66667	0.666667	1	3				24.6667	1.29586
		Alternativa 5	2.5	0.25	0.75	0.5	1.5	1	3.5	5.5	2.75	1.5	1.5	0.25	1.75	3.25	2				28.5	1.49724
		Alternativa 6	2	2	1.33333		0.666667	0.333333	1.66667	0.333333	1.33333	4.33333	4	2	3.33333	2	2				27.3333	1.43595
		Alternativa 7	3.8	0.8	1.2	1.2	2.6	1.2	0.8	0.8	0.6	1.2	0.2	0.2	4.2	4.2	3.6				26.6	1.39743
																					0	0
																					0	0
																					0	0
																					19.035	1	0.672161
			quando são os pesos todos iguais																		Soma		Racio de redestribuição
			0.333333	0.333333	0.333333	0.333333	0.333333	0.333333	0.333333	0.333333	0.333333	0.333333	0.333333	0.333333	0.333333	0.333333	0.333333
		Alternativa 1	2	1	1.11111	0.111111	0.666667	0.555556	0.333333	0.333333	0.333333	0.444444	0.222222	0.555556	0.333333	0.333333	1				9.33333		0.971173
		Alternativa 2	1.58333	0.25	0.5	1.66667	0.833333	0.833333	0.0833333	0.333333	0.333333	0.416667	0.166667	0.25	0.25	0.25	1.33333				9.08333		0.997903
		Alternativa 3	2	1.11111	1.77778	0.111111	1.33333	0.444444	0.111111	0.222222	0.666667	0.222222		0.555556	0.222222	0.222222	0.333333				9.33333		0.971173
		Alternativa 4	0.888889	1.55556	0.777778	0.111111	0.888889				0.111111	0.888889	0.222222	1.22222	0.222222	0.333333	1				8.22222		1.10241
		Alternativa 5	0.833333	0.0833333	0.25	0.166667	0.5	0.333333	1.16667	1.83333	0.916667	0.5	0.5	0.0833333	0.583333	1.08333	0.666667				9.5		0.954135
		Alternativa 6	0.666667	0.666667	0.444444		0.222222	0.111111	0.555556	0.111111	0.444444	1.44444	1.33333	0.666667	1.11111	0.666667	0.666667				9.11111		0.994861
		Alternativa 7	1.26667	0.266667	0.4	0.4	0.866667	0.4	0.266667	0.266667	0.2	0.4	0.0666667	0.0666667	1.4	1.4	1.2				8.86667		1.02229
																					9.06429
		valor dos impactos se os critérios do nivel 1 tivessem o mesmo peso																							soma dos impactos se os critérios do nível 1 tivessem o mesmo impacto. Esta operaçao foi para converter a matriz de impactos a ser usada com apenas o nivel 0
		Alternativa 1	1.94235	0.971173	1.07908	0.107908	0.647449	0.539541	0.323724	0.323724	0.323724	0.431633	0.215816	0.539541	0.323724	0.323724	0.971173				0.503571				3.9926	1.2949	0.971173	1.18699	1.61862
		Alternativa 2	1.58001	0.249476	0.498952	1.66317	0.831586	0.831586	0.0831586	0.332634	0.332634	0.415793	0.166317	0.249476	0.249476	0.249476	1.33054				0.503571				2.32844	3.32634	0.748427	0.831586	1.82949
		Alternativa 3	1.94235	1.07908	1.72653	0.107908	1.2949	0.431633	0.107908	0.215816	0.647449	0.215816		0.539541	0.215816	0.215816	0.323724				0.503571				4.74796	1.83444	0.971173	0.755357	0.755357
		Alternativa 4	0.979923	1.71486	0.857432	0.12249	0.979923				0.12249	0.979923	0.244981	1.34739	0.244981	0.367471	1.10241				0.503571				3.55222	1.10241	0.12249	2.5723	1.71486
		Alternativa 5	0.795113	0.0795113	0.238534	0.159023	0.477068	0.318045	1.11316	1.74925	0.874624	0.477068	0.477068	0.0795113	0.556579	1.03365	0.63609				0.503571				1.11316	0.954135	3.73703	1.03365	2.22632
		Alternativa 6	0.66324	0.66324	0.44216		0.22108	0.11054	0.5527	0.11054	0.44216	1.43702	1.32648	0.66324	1.1054	0.66324	0.66324				0.503571				1.76864	0.33162	1.1054	3.42674	2.43188
		Alternativa 7	1.2949	0.27261	0.408915	0.408915	0.885983	0.408915	0.27261	0.27261	0.204458	0.408915	0.0681525	0.0681525	1.4312	1.4312	1.22675				0.503571				1.97642	1.70381	0.749678	0.54522	4.08915
																									0	0	0	0	0
																									0	0	0	0	0
																									0	0	0	0	0
		Matriz para calcular apenas com nível 0						se os critérios do nivel 0 valerem todos o mesmo -->	0.2	0.2	0.2	0.2	0.2
		Nível 0	0.236612	0.198365	0.135546	0.253554	0.175923																		projeto * nivel1
																							Media se todos criterios valessem o mesmo (considera o nivel 0)		Racio de redestribuição					resultados exercicio
		Alternativa 1	0.79852	0.25898	0.194235	0.237398	0.323724															1.81286	5.44478		0.967901						0.2112	0.1964	0.1745	0.2067	0.2112
		Alternativa 2	0.465688	0.665269	0.149685	0.166317	0.365898															1.81286	5.09825		1.03369						0.284	0.2172	0.2222	0.2766
		Alternativa 3	0.949592	0.366888	0.194235	0.151071	0.151071															1.81286	5.0315		1.0474						0.2678	0.238	0.2253	0.2689
		Alternativa 4	0.710444	0.220483	0.0244981	0.514459	0.342973															1.81286	5.08395		1.0366						0.3113	0.2313	0.2354	0.2221
		Alternativa 5	0.222632	0.190827	0.747406	0.206729	0.445263															1.81286	5.18224		1.01694						0.3937	0.3054	0.3009
		Alternativa 6	0.353728	0.066324	0.22108	0.685348	0.486376															1.81286	5.5015		0.957921						0.2983	0.3311	0.3706
		Alternativa 7	0.395285	0.340763	0.149936	0.109044	0.81783															1.81286	5.54782		0.949924
																						1.81286	5.27		1.00148
		esta é que é a matriz usada nos diversos MCDM!
		Alternativa 1	0.772889	0.250667	0.188	0.229778	0.313333															1.75467	0.350933
		Alternativa 2	0.481377	0.687681	0.154728	0.17192	0.378225															1.87393	0.374786
		Alternativa 3	0.994604	0.384279	0.203442	0.158232	0.158232															1.89879	0.379758
		Alternativa 4	0.736444	0.228552	0.0253946	0.533287	0.355525															1.8792	0.37584
		Alternativa 5	0.226402	0.194059	0.760064	0.210231	0.452804															1.84356	0.368712
		Alternativa 6	0.338844	0.0635332	0.211777	0.656509	0.46591															1.73657	0.347315
		Alternativa 7	0.37549	0.323699	0.142427	0.103584	0.776876															1.72208	0.344415
																								Order	Rank
		Alternativa 1	0.182875	0.0497235	0.0254826	0.0582611	0.0551226														0.371464			88.2774	4
		Alternativa 2	0.1139	0.136412	0.0209727	0.0435911	0.0665385														0.381414			90.6418	3
		Alternativa 3	0.235335	0.0762275	0.0275756	0.0401205	0.0278368														0.407096			96.745	2
		Alternativa 4	0.174251	0.0453367	0.00344213	0.135217	0.0625451														0.420792			100	1
		Alternativa 5	0.0535695	0.0384945	0.103023	0.0533049	0.0796588														0.328051			77.9603	7
		Alternativa 6	0.0801744	0.0126028	0.0287055	0.166461	0.0819644														0.369908			87.9074	5
		Alternativa 7	0.0888455	0.0642105	0.0193054	0.026264	0.136671														0.335296			79.682	6
																					0.373432
		teste com potencia (em vez de multiplicar o impacto do projeto com o peso do criterio)
		Alternativa 1	0.940865	0.759979	0.797288	0.688743	0.815335														4.00221			99.3408	2
		Alternativa 2	0.841148	0.928417	0.776515	0.639903	0.842784														4.02877			100	1
		Alternativa 3	0.998721	0.827196	0.805865	0.626582	0.722999														3.98136			98.8233	3
		Alternativa 4	0.930173	0.746182	0.607813	0.852648	0.833657														3.97047			98.5531	4
		Alternativa 5	0.703651	0.722355	0.963496	0.67339	0.869895														3.93279			97.6176	6
		Alternativa 6	0.774091	0.578838	0.810263	0.898795	0.874272														3.93626			97.7038	5
		Alternativa 7	0.793131	0.799519	0.767845	0.562759	0.956556														3.87981			96.3027	7
																					3.96167
									Economia	Patrimonio natural	Territorio	Inclusao	Qualidade
			0.2112	0.1964	0.1745	0.2067	0.2112		100	92.9924	82.6231	97.8693	100
			0.284	0.2172	0.2222	0.2766			100	76.4789	78.2394	97.3944
			0.2678	0.238	0.2253	0.2689			99.5909	88.5087	83.7858	100
			0.3113	0.2313	0.2354	0.2221			100	74.3013	75.6184	71.346
			0.3937	0.3054	0.3009				100	77.5718	76.4288
			0.2983	0.3311	0.3706				80.4911	89.3416	100
			0.2	0.2	0.2	0.2	0.2
			0.25	0.25	0.25	0.25
			0.25	0.25	0.25	0.25
			0.25	0.25	0.25	0.25
			0.33	0.33	0.33
			0.33	0.33	0.33
			0.3	0.25	0.2	0.1	0.15
			0.3	0.15	0.4	0.15
			0.15	0.4	0.3	0.15
			0.25	0.3	0.2	0.25
			0.3	0.3	0.4
			0.4	0.4	0.2
			quando são os pesos todos iguais
			0.25	0.25	0.25	0.25	0.25	0.25	0.25	0.25	0.25	0.25	0.25	0.25	0.333333	0.333333	0.333333	0.333333	0.333333	0.333333
			0.2112				0.1964				0.1745				0.2067			0.2112
			0.284	0.2172	0.2222	0.2766	0.2678	0.238	0.2253	0.2689	0.3113	0.2313	0.2354	0.2221	0.3937	0.3054	0.3009	0.2983	0.3311	0.3706

## Sheet: AHP_nivel_0 (neutral)
		PROJETOS-ÂNCORA					ÁREAS DE INTERVENÇÃO & OBJETIVOS ESTRATÉGICOS
			Criteria A			Criteria B			Criteria C			Criteria D			Criteria E
		Alternativa 1	6	3	3.33333	0.333333	2	1.66667	1	1	1	1.33333	0.666667	1.66667	1	1	3				28	1.47097
		Alternativa 2	4.75	0.75	1.5	5	2.5	2.5	0.25	1	1	1.25	0.5	0.75	0.75	0.75	4				27.25	1.43157
		Alternativa 3	6	3.33333	5.33333	0.333333	4	1.33333	0.333333	0.666667	2	0.666667		1.66667	0.666667	0.666667	1				28	1.47097
		Alternativa 4	2.66667	4.66667	2.33333	0.333333	2.66667				0.333333	2.66667	0.666667	3.66667	0.666667	1	3				24.6667	1.29586
		Alternativa 5	2.5	0.25	0.75	0.5	1.5	1	3.5	5.5	2.75	1.5	1.5	0.25	1.75	3.25	2				28.5	1.49724
		Alternativa 6	2	2	1.33333		0.666667	0.333333	1.66667	0.333333	1.33333	4.33333	4	2	3.33333	2	2				27.3333	1.43595
		Alternativa 7	3.8	0.8	1.2	1.2	2.6	1.2	0.8	0.8	0.6	1.2	0.2	0.2	4.2	4.2	3.6				26.6	1.39743
																					0	0
																					0	0
																					0	0
																					19.035	1	0.672161
			quando são os pesos todos iguais																		Soma		Racio de redestribuição
			0.333333	0.333333	0.333333	0.333333	0.333333	0.333333	0.333333	0.333333	0.333333	0.333333	0.333333	0.333333	0.333333	0.333333	0.333333
		Alternativa 1	2	1	1.11111	0.111111	0.666667	0.555556	0.333333	0.333333	0.333333	0.444444	0.222222	0.555556	0.333333	0.333333	1				9.33333		0.971173
		Alternativa 2	1.58333	0.25	0.5	1.66667	0.833333	0.833333	0.0833333	0.333333	0.333333	0.416667	0.166667	0.25	0.25	0.25	1.33333				9.08333		0.997903
		Alternativa 3	2	1.11111	1.77778	0.111111	1.33333	0.444444	0.111111	0.222222	0.666667	0.222222		0.555556	0.222222	0.222222	0.333333				9.33333		0.971173
		Alternativa 4	0.888889	1.55556	0.777778	0.111111	0.888889				0.111111	0.888889	0.222222	1.22222	0.222222	0.333333	1				8.22222		1.10241
		Alternativa 5	0.833333	0.0833333	0.25	0.166667	0.5	0.333333	1.16667	1.83333	0.916667	0.5	0.5	0.0833333	0.583333	1.08333	0.666667				9.5		0.954135
		Alternativa 6	0.666667	0.666667	0.444444		0.222222	0.111111	0.555556	0.111111	0.444444	1.44444	1.33333	0.666667	1.11111	0.666667	0.666667				9.11111		0.994861
		Alternativa 7	1.26667	0.266667	0.4	0.4	0.866667	0.4	0.266667	0.266667	0.2	0.4	0.0666667	0.0666667	1.4	1.4	1.2				8.86667		1.02229
																					9.06429
		valor dos impactos se os critérios do nivel 1 tivessem o mesmo peso																							soma dos impactos se os critérios do nível 1 tivessem o mesmo impacto. Esta operaçao foi para converter a matriz de impactos a ser usada com apenas o nivel 0
		Alternativa 1	1.94235	0.971173	1.07908	0.107908	0.647449	0.539541	0.323724	0.323724	0.323724	0.431633	0.215816	0.539541	0.323724	0.323724	0.971173				0.503571				3.9926	1.2949	0.971173	1.18699	1.61862
		Alternativa 2	1.58001	0.249476	0.498952	1.66317	0.831586	0.831586	0.0831586	0.332634	0.332634	0.415793	0.166317	0.249476	0.249476	0.249476	1.33054				0.503571				2.32844	3.32634	0.748427	0.831586	1.82949
		Alternativa 3	1.94235	1.07908	1.72653	0.107908	1.2949	0.431633	0.107908	0.215816	0.647449	0.215816		0.539541	0.215816	0.215816	0.323724				0.503571				4.74796	1.83444	0.971173	0.755357	0.755357
		Alternativa 4	0.979923	1.71486	0.857432	0.12249	0.979923				0.12249	0.979923	0.244981	1.34739	0.244981	0.367471	1.10241				0.503571				3.55222	1.10241	0.12249	2.5723	1.71486
		Alternativa 5	0.795113	0.0795113	0.238534	0.159023	0.477068	0.318045	1.11316	1.74925	0.874624	0.477068	0.477068	0.0795113	0.556579	1.03365	0.63609				0.503571				1.11316	0.954135	3.73703	1.03365	2.22632
		Alternativa 6	0.66324	0.66324	0.44216		0.22108	0.11054	0.5527	0.11054	0.44216	1.43702	1.32648	0.66324	1.1054	0.66324	0.66324				0.503571				1.76864	0.33162	1.1054	3.42674	2.43188
		Alternativa 7	1.2949	0.27261	0.408915	0.408915	0.885983	0.408915	0.27261	0.27261	0.204458	0.408915	0.0681525	0.0681525	1.4312	1.4312	1.22675				0.503571				1.97642	1.70381	0.749678	0.54522	4.08915
																									0	0	0	0	0
																									0	0	0	0	0
																									0	0	0	0	0
		Matriz para calcular apenas com nível 0						se os critérios do nivel 0 valerem todos o mesmo -->	0.2	0.2	0.2	0.2	0.2
		Nível 0	0.2	0.2	0.2	0.2	0.2																		projeto * nivel1
																							Media se todos criterios valessem o mesmo (considera o nivel 0)		Racio de redestribuição					resultados exercicio
		Alternativa 1	0.79852	0.25898	0.194235	0.237398	0.323724															1.81286	5.44478		0.967901						0.2112	0.1964	0.1745	0.2067	0.2112
		Alternativa 2	0.465688	0.665269	0.149685	0.166317	0.365898															1.81286	5.09825		1.03369						0.284	0.2172	0.2222	0.2766
		Alternativa 3	0.949592	0.366888	0.194235	0.151071	0.151071															1.81286	5.0315		1.0474						0.2678	0.238	0.2253	0.2689
		Alternativa 4	0.710444	0.220483	0.0244981	0.514459	0.342973															1.81286	5.08395		1.0366						0.3113	0.2313	0.2354	0.2221
		Alternativa 5	0.222632	0.190827	0.747406	0.206729	0.445263															1.81286	5.18224		1.01694						0.3937	0.3054	0.3009
		Alternativa 6	0.353728	0.066324	0.22108	0.685348	0.486376															1.81286	5.5015		0.957921						0.2983	0.3311	0.3706
		Alternativa 7	0.395285	0.340763	0.149936	0.109044	0.81783															1.81286	5.54782		0.949924
																						1.81286	5.27		1.00148
		esta é que é a matriz usada nos diversos MCDM!
		Alternativa 1	0.772889	0.250667	0.188	0.229778	0.313333															1.75467	0.350933
		Alternativa 2	0.481377	0.687681	0.154728	0.17192	0.378225															1.87393	0.374786
		Alternativa 3	0.994604	0.384279	0.203442	0.158232	0.158232															1.89879	0.379758
		Alternativa 4	0.736444	0.228552	0.0253946	0.533287	0.355525															1.8792	0.37584
		Alternativa 5	0.226402	0.194059	0.760064	0.210231	0.452804															1.84356	0.368712
		Alternativa 6	0.338844	0.0635332	0.211777	0.656509	0.46591															1.73657	0.347315
		Alternativa 7	0.37549	0.323699	0.142427	0.103584	0.776876															1.72208	0.344415
																								Order	Rank
		Alternativa 1	0.154578	0.0501333	0.0376	0.0459555	0.0626667														0.350933			92.4097	5
		Alternativa 2	0.0962754	0.137536	0.0309457	0.0343841	0.075645														0.374786			98.6909	3
		Alternativa 3	0.198921	0.0768558	0.0406883	0.0316465	0.0316465														0.379758			100	1
		Alternativa 4	0.147289	0.0457103	0.00507892	0.106657	0.0711049														0.37584			98.9684	2
		Alternativa 5	0.0452804	0.0388118	0.152013	0.0420461	0.0905609														0.368712			97.0914	4
		Alternativa 6	0.0677687	0.0127066	0.0423554	0.131302	0.093182														0.347315			91.4569	6
		Alternativa 7	0.0750981	0.0647397	0.0284855	0.0207167	0.155375														0.344415			90.6934	7
																					0.363109
		teste com potencia (em vez de multiplicar o impacto do projeto com o peso do criterio)
		Alternativa 1	0.949781	0.758262	0.715866	0.745181	0.792869														3.96196			98.881	3
		Alternativa 2	0.863967	0.927849	0.688516	0.703178	0.823285														4.00679			100	1
		Alternativa 3	0.998918	0.825903	0.727257	0.691607	0.691607														3.93529			98.2155	4
		Alternativa 4	0.94065	0.744384	0.479676	0.881845	0.813156														3.85971			96.3291	7
		Alternativa 5	0.742978	0.720422	0.946608	0.732047	0.853458														3.99551			99.7184	2
		Alternativa 6	0.805378	0.576236	0.733121	0.919281	0.858342														3.89236			97.1439	5
		Alternativa 7	0.822091	0.798046	0.677203	0.635416	0.950759														3.88351			96.9232	6
																					3.93359
									Economia	Patrimonio natural	Territorio	Inclusao	Qualidade
			0.2112	0.1964	0.1745	0.2067	0.2112		100	92.9924	82.6231	97.8693	100
			0.284	0.2172	0.2222	0.2766			100	76.4789	78.2394	97.3944
			0.2678	0.238	0.2253	0.2689			99.5909	88.5087	83.7858	100
			0.3113	0.2313	0.2354	0.2221			100	74.3013	75.6184	71.346
			0.3937	0.3054	0.3009				100	77.5718	76.4288
			0.2983	0.3311	0.3706				80.4911	89.3416	100
			0.2	0.2	0.2	0.2	0.2
			0.25	0.25	0.25	0.25
			0.25	0.25	0.25	0.25
			0.25	0.25	0.25	0.25
			0.33	0.33	0.33
			0.33	0.33	0.33
			0.3	0.25	0.2	0.1	0.15
			0.3	0.15	0.4	0.15
			0.15	0.4	0.3	0.15
			0.25	0.3	0.2	0.25
			0.3	0.3	0.4
			0.4	0.4	0.2
			quando são os pesos todos iguais
			0.25	0.25	0.25	0.25	0.25	0.25	0.25	0.25	0.25	0.25	0.25	0.25	0.333333	0.333333	0.333333	0.333333	0.333333	0.333333
			0.2112				0.1964				0.1745				0.2067			0.2112
			0.284	0.2172	0.2222	0.2766	0.2678	0.238	0.2253	0.2689	0.3113	0.2313	0.2354	0.2221	0.3937	0.3054	0.3009	0.2983	0.3311	0.3706

## Sheet: SAW_nivel_0_minimo
	Criteria A	Criteria B	Criteria C	Criteria D	Criteria E
cópia da tabela anterior - ilhavo harmonizaçao (média dos scores iniciais)
Alternativa 1	0.772889	0.250667	0.188	0.229778	0.313333
Alternativa 2	0.481377	0.687681	0.154728	0.17192	0.378225
Alternativa 3	0.994604	0.384279	0.203442	0.158232	0.158232
Alternativa 4	0.736444	0.228552	0.0253946	0.533287	0.355525
Alternativa 5	0.226402	0.194059	0.760064	0.210231	0.452804
Alternativa 6	0.338844	0.0635332	0.211777	0.656509	0.46591
Alternativa 7	0.37549	0.323699	0.142427	0.103584	0.776876
																										4
																										0.25	0.25	0.25	0.25	0.25	0.25
																										0.2112				0.1964
conversao da matriz de impacto numa escala de 1 a 5	Criteria A	Criteria B	Criteria C	Criteria D	Criteria E																					Criteria A	Criteria B	Criteria C	Criteria D	Criteria E
Alternativa 1	4.08496	1.92971	1.67108	1.8435	2.18834															sistema de equação [a(min)+b=1 ///// a(max)+b=5]					pesos	0.236612	0.198365	0.135546	0.253554	0.175923
Alternativa 2	2.88187	3.73331	1.53377	1.60472	2.45616															para transformar os pesos numa escala de 1 a 5						4	3	1	5	2
Alternativa 3	5	2.48114	1.73481	1.54823	1.54823																				conversao sem arredondar	4	3.12933	0.999849	5.00014	2.36858
Alternativa 4	3.93455	1.83844	1	3.09611	2.36247
Alternativa 5	1.82957	1.69609	4.03204	1.76283	2.76395																	min	0.0253946				min	0.13555
Alternativa 6	2.29363	1.1574	1.76922	3.60466	2.81804															0.895194		máx	0.994604				máx	0.25355
Alternativa 7	2.44487	2.23112	1.483	1.32269	4.10142																						b	-3.59492
																				4.12708							a	33.8983							http://www.calculadoraonline.com.br/sistemas-lineares
																				assumindo os mesmos pesos do exercício tambem convertidos numa escala de 1-5
SAW method - todos os critérios são considerados custo (relacao com o mínimo)	P1,1	P1,2	P1,3	P1,4	P1,5																	ordenaçao				se os pesos forem convertidos numa escala 1-5 mas não estiverem arredondados
	0.44788	0.599778	0.598414	0.717488	0.70749														1	Alternativa 1	9.19169	82.3104	6			92.7726	2			9.79196	82.58	5
SAW weight	1.79152	1.79933	0.598414	3.58744	1.41498														2	Alternativa 2	9.50341	85.1018	5			70.3965	7			8.00063	67.4729	7
	P2,1	P2,2	P2,3	P2,4	P2,5														3	Alternativa 3	9.71115	86.9621	3			78.5866	5			10.087	85.0684	3
	0.634856	0.31002	0.651988	0.824249	0.630347														4	Alternativa 4	8.19541	73.3889	7			67.4035	8			9.83513	82.9441	4
SAW weight	2.53942	0.930061	0.651988	4.12125	1.26069														5	Alternativa 5	11.1671	100	1			81.3752	4			8.5358	71.9862	6
	P3,1	P3,2	P3,3	P3,4	P3,5														6	Alternativa 6	9.68943	86.7676	4			60.6875	9			10.9071	91.9848	2
	0.365915	0.466479	0.576431	0.854324	1														7	Alternativa 7	10.9789	98.3143	2			53.1555	10			11.8575	100	1
SAW weight	1.46366	1.39944	0.576431	4.27162	2																					77.8698	6			0	0	8
	P4,1	P4,2	P4,3	P4,4	P4,5																					100	1			0	0	8
	0.465001	0.629554	1	0.427211	0.655344																					89.1909	3			0	0	8
SAW weight	1.86001	1.88866	1	2.13605	1.31069
	P5,1	P5,2	P5,3	P5,4	P5,5																média	87.5493
	1	0.682393	0.248014	0.750322	0.560151																desvio padrao	0.949266
SAW weight	4	2.04718	0.248014	3.75161	1.1203																variancia	0.901106
	P6,1	P6,2	P6,3	P6,4	P6,5
	0.797677	1	0.565222	0.366939	0.5494
SAW weight	3.19071	3	0.565222	1.8347	1.0988
	P7,1	P7,2	P7,3	P7,4	P7,5															Weighted product method
	0.748331	0.518753	0.674308	1	0.377487
SAW weight	2.99332	1.55626	0.674308	5	0.754973
																			1	Radar de oportunidades	9.79196	82.58
																			2	Plano de gestão florestal	8.00063
																			3	Dinamização das atividades económicas	10.087
																			4	Gestão de competências (capital humano)	9.83513
																			5	Regeneração urbana e Mobilidade	8.5358
																			6	Consolidação e requalificação da rede de equipamentos e serviços coletivos	10.9071
																			7	Estratégia de comunicação e marketing	11.8575

## Sheet: SAW_nivel_0_máximo
	Criteria A	Criteria B	Criteria C	Criteria D	Criteria E
cópia da tabela anterior - ilhavo harmonizaçao (média dos scores iniciais)
Alternativa 1	0.772889	0.250667	0.188	0.229778	0.313333
Alternativa 2	0.481377	0.687681	0.154728	0.17192	0.378225
Alternativa 3	0.994604	0.384279	0.203442	0.158232	0.158232
Alternativa 4	0.736444	0.228552	0.0253946	0.533287	0.355525
Alternativa 5	0.226402	0.194059	0.760064	0.210231	0.452804
Alternativa 6	0.338844	0.0635332	0.211777	0.656509	0.46591
Alternativa 7	0.37549	0.323699	0.142427	0.103584	0.776876
																										4
																										0.25	0.25	0.25	0.25	0.25	0.25
																										0.2112				0.1964
conversao da matriz de impacto numa escala de 1 a 5	Criteria A	Criteria B	Criteria C	Criteria D	Criteria E																					Criteria A	Criteria B	Criteria C	Criteria D	Criteria E
Alternativa 1	4.08496	1.92971	1.67108	1.8435	2.18834															sistema de equação [a(min)+b=1 ///// a(max)+b=5]					pesos	0.236612	0.198365	0.135546	0.253554	0.175923
Alternativa 2	2.88187	3.73331	1.53377	1.60472	2.45616															para transformar os pesos numa escala de 1 a 5						4	3	1	5	2
Alternativa 3	5	2.48114	1.73481	1.54823	1.54823																				conversao sem arredondar	4	3.12933	0.999849	5.00014	2.36858
Alternativa 4	3.93455	1.83844	1	3.09611	2.36247
Alternativa 5	1.82957	1.69609	4.03204	1.76283	2.76395																	min	0.0253946				min	0.13555
Alternativa 6	2.29363	1.1574	1.76922	3.60466	2.81804															0.895194		máx	0.994604				máx	0.25355
Alternativa 7	2.44487	2.23112	1.483	1.32269	4.10142																						b	-3.59492
																				4.12708							a	33.8983							http://www.calculadoraonline.com.br/sistemas-lineares
																				assumindo os mesmos pesos do exercício tambem convertidos numa escala de 1-5
SAW method - todos os critérios são considerados beneficio (relacao com o máximo)	P1,1	P1,2	P1,3	P1,4	P1,5																	ordenaçao				se os pesos forem convertidos numa escala 1-5 mas não estiverem arredondados
	0.816993	0.516891	0.414452	0.511423	0.533558														1	Alternativa 1	8.85733	85.83	5			92.7726	2			5.73105	81.7061	3
SAW weight	3.26797	1.55067	0.414452	2.55711	1.06712														2	Alternativa 2	9.10951	88.2737	4			70.3965	7			7.01422	100	1
	P2,1	P2,2	P2,3	P2,4	P2,5														3	Alternativa 3	9.32656	90.3771	3			78.5866	5			5.56341	79.3161	5
	0.576375	1	0.380396	0.44518	0.598855														4	Alternativa 4	10.3196	100	1			67.4035	8			5.70589	81.3475	4
SAW weight	2.3055	3	0.380396	2.2259	1.19771														5	Alternativa 5	7.61961	73.8363	7			81.3752	4			6.57445	93.7303	2
	P3,1	P3,2	P3,3	P3,4	P3,5														6	Alternativa 6	9.57793	92.8129	2			60.6875	9			5.14509	73.3522	6
	1	0.664596	0.430257	0.429509	0.377487														7	Alternativa 7	7.95128	77.0502	6			53.1555	10			4.7327	67.4729	7
SAW weight	4	1.99379	0.430257	2.14754	0.754973																					77.8698	6			0	0	8
	P4,1	P4,2	P4,3	P4,4	P4,5																					100	1			0	0	8
	0.786911	0.492444	0.248014	0.858919	0.576013																					89.1909	3			0	0	8
SAW weight	3.14764	1.47733	0.248014	4.2946	1.15203
	P5,1	P5,2	P5,3	P5,4	P5,5																média	86.8829
	0.365915	0.454313	1	0.489043	0.673901																desvio padrao	0.862848
SAW weight	1.46366	1.36294	1	2.44521	1.3478																variancia	0.744506
	P6,1	P6,2	P6,3	P6,4	P6,5
	0.458725	0.31002	0.438789	1	0.687088
SAW weight	1.8349	0.930061	0.438789	5	1.37418
	P7,1	P7,2	P7,3	P7,4	P7,5
	0.488974	0.597626	0.367805	0.366939	1
SAW weight	1.9559	1.79288	0.367805	1.8347	2

## Sheet: SAW_nivel_0_máximo (neutral)
	Criteria A	Criteria B	Criteria C	Criteria D	Criteria E
cópia da tabela anterior - ilhavo harmonizaçao (média dos scores iniciais)
Alternativa 1	0.772889	0.250667	0.188	0.229778	0.313333
Alternativa 2	0.481377	0.687681	0.154728	0.17192	0.378225
Alternativa 3	0.994604	0.384279	0.203442	0.158232	0.158232
Alternativa 4	0.736444	0.228552	0.0253946	0.533287	0.355525
Alternativa 5	0.226402	0.194059	0.760064	0.210231	0.452804
Alternativa 6	0.338844	0.0635332	0.211777	0.656509	0.46591
Alternativa 7	0.37549	0.323699	0.142427	0.103584	0.776876
																										5
																										0.25	0.25	0.25	0.25	0.25	0.25
																										0.2112				0.1964
conversao da matriz de impacto numa escala de 1 a 5	Criteria A	Criteria B	Criteria C	Criteria D	Criteria E																					Criteria A	Criteria B	Criteria C	Criteria D	Criteria E
Alternativa 1	4.08496	1.92971	1.67108	1.8435	2.18834															sistema de equação [a(min)+b=1 ///// a(max)+b=5]					pesos	0.2	0.2	0.2	0.1999	0.2
Alternativa 2	2.88187	3.73331	1.53377	1.60472	2.45616															para transformar os pesos numa escala de 1 a 5						5	5	5	1	5
Alternativa 3	5	2.48114	1.73481	1.54823	1.54823																				conversao sem arredondar	5	5	5	1	5
Alternativa 4	3.93455	1.83844	1	3.09611	2.36247
Alternativa 5	1.82957	1.69609	4.03204	1.76283	2.76395																	min	0.0253946				min	0.1999
Alternativa 6	2.29363	1.1574	1.76922	3.60466	2.81804															0.895194		máx	0.994604				máx	0.2
Alternativa 7	2.44487	2.23112	1.483	1.32269	4.10142																						b	-7995
																				4.12708							a	40000							http://www.calculadoraonline.com.br/sistemas-lineares
																				assumindo os mesmos pesos do exercício tambem convertidos numa escala de 1-5
SAW method - todos os critérios são considerados beneficio (relacao com o máximo)	P1,1	P1,2	P1,3	P1,4	P1,5																	ordenaçao				se os pesos forem convertidos numa escala 1-5 mas não estiverem arredondados
	0.816993	0.516891	0.414452	0.511423	0.533558														1	Alternativa 1	11.9209	90.1506	5			92.7726	2			29.8492	81.7061	3
SAW weight	4.08496	2.58446	2.07226	0.511423	2.66779														2	Alternativa 2	13.2233	100	1			70.3965	7			36.5324	100	1
	P2,1	P2,2	P2,3	P2,4	P2,5														3	Alternativa 3	12.7912	96.7323	3			78.5866	5			28.9761	79.3161	5
	0.576375	1	0.380396	0.44518	0.598855														4	Alternativa 4	11.3758	86.0286	6			67.4035	8			29.7182	81.3475	4
SAW weight	2.88187	5	1.90198	0.44518	2.99427														5	Alternativa 5	12.9597	98.0064	2			81.3752	4			34.2419	93.7303	2
	P3,1	P3,2	P3,3	P3,4	P3,5														6	Alternativa 6	10.4731	79.202	7			60.6875	9			26.7973	73.3522	6
	1	0.664596	0.430257	0.429509	0.377487														7	Alternativa 7	12.639	95.581	4			53.1555	10			24.6495	67.4729	7
SAW weight	5	3.32298	2.15129	0.429509	1.88743																					77.8698	6			0	0	8
	P4,1	P4,2	P4,3	P4,4	P4,5																					100	1			0	0	8
	0.786911	0.492444	0.248014	0.858919	0.576013																					89.1909	3			0	0	8
SAW weight	3.93455	2.46222	1.24007	0.858919	2.88006
	P5,1	P5,2	P5,3	P5,4	P5,5																média	92.243
	0.365915	0.454313	1	0.489043	0.673901																desvio padrao	0.91852
SAW weight	1.82957	2.27157	5	0.489043	3.3695																variancia	0.843679
	P6,1	P6,2	P6,3	P6,4	P6,5
	0.458725	0.31002	0.438789	1	0.687088
SAW weight	2.29363	1.5501	2.19395	1	3.43544
	P7,1	P7,2	P7,3	P7,4	P7,5
	0.488974	0.597626	0.367805	0.366939	1
SAW weight	2.44487	2.98813	1.83902	0.366939	5

## Sheet: WPM_nivel_0
	Criteria A	Criteria B	Criteria C	Criteria D	Criteria E
cópia da tabela anterior - ilhavo harmonizaçao (média dos scores iniciais)
Alternativa 1	0.772889	0.250667	0.188	0.229778	0.313333
Alternativa 2	0.481377	0.687681	0.154728	0.17192	0.378225
Alternativa 3	0.994604	0.384279	0.203442	0.158232	0.158232
Alternativa 4	0.736444	0.228552	0.0253946	0.533287	0.355525
Alternativa 5	0.226402	0.194059	0.760064	0.210231	0.452804
Alternativa 6	0.338844	0.0635332	0.211777	0.656509	0.46591
Alternativa 7	0.37549	0.323699	0.142427	0.103584	0.776876
																										4
																										0.25	0.25	0.25	0.25	0.25	0.25
																										0.2112				0.1964
Caso: média scores originais, caso os critérios tivessem todos o mesmo peso	Criteria A	Criteria B	Criteria C	Criteria D	Criteria E																					Criteria A	Criteria B	Criteria C	Criteria D	Criteria E
Alternativa 1	4.08496	1.92971	1.67108	1.8435	2.18834															sistema de equação [a(min)+b=1 ///// a(max)+b=5]					pesos	0.236612	0.198365	0.135546	0.253554	0.175923
Alternativa 2	2.88187	3.73331	1.53377	1.60472	2.45616															para transformar os pesos numa escala de 1 a 5						4	3	1	5	2
Alternativa 3	5	2.48114	1.73481	1.54823	1.54823																				conversao sem arredondar	4	3.12933	0.999849	5.00014	2.36858
Alternativa 4	3.93455	1.83844	1	3.09611	2.36247
Alternativa 5	1.82957	1.69609	4.03204	1.76283	2.76395																	min	0.0253946				min	0.13555
Alternativa 6	2.29363	1.1574	1.76922	3.60466	2.81804															0.895194		máx	0.994604				máx	0.25355
Alternativa 7	2.44487	2.23112	1.483	1.32269	4.10142																						b	-3.59492
																				4.12708							a	33.8983							http://www.calculadoraonline.com.br/sistemas-lineares
																				Weighted product method
based on SAW method	P1,1	P1,2	P1,3	P1,4	P1,5
	0.44788	0.599778	0.598414	0.717488	0.70749														1	Alternativa 1	0.000494461	8.40821	3
WPM weight	0.0402389	0.215761	0.598414	0.190139	0.500542														2	Alternativa 2	0.000477048	8.1121	5
	P2,1	P2,2	P2,3	P2,4	P2,5														3	Alternativa 3	0.000477393	8.11797	4
	0.634856	0.31002	0.651988	0.824249	0.630347														4	Alternativa 4	7.12961e-05	1.21238	7
WPM weight	0.162442	0.0297968	0.651988	0.380446	0.397338														5	Alternativa 5	0.00588069	100	1
	P3,1	P3,2	P3,3	P3,4	P3,5														6	Alternativa 6	0.000459491	7.81356	6
	0.365915	0.466479	0.576431	0.854324	1														7	Alternativa 7	0.00420646	71.5301	2
WPM weight	0.0179275	0.101507	0.576431	0.455106	1
	P4,1	P4,2	P4,3	P4,4	P4,5
	0.465001	0.629554	1	0.427211	0.655344
WPM weight	0.0467538	0.249517	1	0.0142302	0.429476
	P5,1	P5,2	P5,3	P5,4	P5,5
	1	0.682393	0.248014	0.750322	0.560151
WPM weight	1	0.317763	0.248014	0.237814	0.31377
	P6,1	P6,2	P6,3	P6,4	P6,5
	0.797677	1	0.565222	0.366939	0.5494
WPM weight	0.404863	1	0.565222	0.00665231	0.301841
	P7,1	P7,2	P7,3	P7,4	P7,5
	0.748331	0.518753	0.674308	1	0.377487
WPM weight	0.3136	0.139599	0.674308	1	0.142496

## Sheet: WPM_nivel_0 (maximo)
	Criteria A	Criteria B	Criteria C	Criteria D	Criteria E
cópia da tabela anterior - ilhavo harmonizaçao (média dos scores iniciais)
Alternativa 1	0.772889	0.250667	0.188	0.229778	0.313333
Alternativa 2	0.481377	0.687681	0.154728	0.17192	0.378225
Alternativa 3	0.994604	0.384279	0.203442	0.158232	0.158232
Alternativa 4	0.736444	0.228552	0.0253946	0.533287	0.355525
Alternativa 5	0.226402	0.194059	0.760064	0.210231	0.452804
Alternativa 6	0.338844	0.0635332	0.211777	0.656509	0.46591
Alternativa 7	0.37549	0.323699	0.142427	0.103584	0.776876
																										4
																										0.25	0.25	0.25	0.25	0.25	0.25
																										0.2112				0.1964
Caso: média scores originais, caso os critérios tivessem todos o mesmo peso	Criteria A	Criteria B	Criteria C	Criteria D	Criteria E																					Criteria A	Criteria B	Criteria C	Criteria D	Criteria E
Alternativa 1	4.08496	1.92971	1.67108	1.8435	2.18834															sistema de equação [a(min)+b=1 ///// a(max)+b=5]					pesos	0.236612	0.198365	0.135546	0.253554	0.175923
Alternativa 2	2.88187	3.73331	1.53377	1.60472	2.45616															para transformar os pesos numa escala de 1 a 5						4	3	1	5	2
Alternativa 3	5	2.48114	1.73481	1.54823	1.54823																				conversao sem arredondar	4	3.12933	0.999849	5.00014	2.36858
Alternativa 4	3.93455	1.83844	1	3.09611	2.36247
Alternativa 5	1.82957	1.69609	4.03204	1.76283	2.76395																	min	0.0253946				min	0.13555
Alternativa 6	2.29363	1.1574	1.76922	3.60466	2.81804															0.895194		máx	0.994604				máx	0.25355
Alternativa 7	2.44487	2.23112	1.483	1.32269	4.10142																						b	-3.59492
																				4.12708							a	33.8983							http://www.calculadoraonline.com.br/sistemas-lineares
																				Weighted product method
based on SAW method	P1,1	P1,2	P1,3	P1,4	P1,5
	0.816993	0.516891	0.414452	0.511423	0.533558														1	Alternativa 1	0.000253985	14.419	5
WPM weight	0.445526	0.138101	0.414452	0.0349865	0.284684														2	Alternativa 2	0.000263256	14.9453	3
	P2,1	P2,2	P2,3	P2,4	P2,5														3	Alternativa 3	0.000263066	14.9345	4
	0.576375	1	0.380396	0.44518	0.598855														4	Alternativa 4	0.00176146	100	1
WPM weight	0.110362	1	0.380396	0.0174856	0.358627														5	Alternativa 5	2.13556e-05	1.21238	7
	P3,1	P3,2	P3,3	P3,4	P3,5														6	Alternativa 6	0.000273314	15.5163	2
	1	0.664596	0.430257	0.429509	0.377487														7	Alternativa 7	2.98554e-05	1.69492	6
WPM weight	1	0.293544	0.430257	0.014617	0.142496
	P4,1	P4,2	P4,3	P4,4	P4,5
	0.786911	0.492444	0.248014	0.858919	0.576013
WPM weight	0.383444	0.119418	0.248014	0.467479	0.331791
	P5,1	P5,2	P5,3	P5,4	P5,5
	0.365915	0.454313	1	0.489043	0.673901
WPM weight	0.0179275	0.0937704	1	0.0279727	0.454143
	P6,1	P6,2	P6,3	P6,4	P6,5
	0.458725	0.31002	0.438789	1	0.687088
WPM weight	0.0442804	0.0297968	0.438789	1	0.472091
	P7,1	P7,2	P7,3	P7,4	P7,5
	0.488974	0.597626	0.367805	0.366939	1
WPM weight	0.0571668	0.213446	0.367805	0.00665231	1

## Sheet: WPM_nivel_0 (maximo) (neutral)
	Criteria A	Criteria B	Criteria C	Criteria D	Criteria E
cópia da tabela anterior - ilhavo harmonizaçao (média dos scores iniciais)
Alternativa 1	0.772889	0.250667	0.188	0.229778	0.313333
Alternativa 2	0.481377	0.687681	0.154728	0.17192	0.378225
Alternativa 3	0.994604	0.384279	0.203442	0.158232	0.158232
Alternativa 4	0.736444	0.228552	0.0253946	0.533287	0.355525
Alternativa 5	0.226402	0.194059	0.760064	0.210231	0.452804
Alternativa 6	0.338844	0.0635332	0.211777	0.656509	0.46591
Alternativa 7	0.37549	0.323699	0.142427	0.103584	0.776876
																										5
																										0.25	0.25	0.25	0.25	0.25	0.25
																										0.2112				0.1964
Caso: média scores originais, caso os critérios tivessem todos o mesmo peso	Criteria A	Criteria B	Criteria C	Criteria D	Criteria E																					Criteria A	Criteria B	Criteria C	Criteria D	Criteria E
Alternativa 1	4.08496	1.92971	1.67108	1.8435	2.18834															sistema de equação [a(min)+b=1 ///// a(max)+b=5]					pesos	0.2	0.2	0.2	0.1999	0.2
Alternativa 2	2.88187	3.73331	1.53377	1.60472	2.45616															para transformar os pesos numa escala de 1 a 5						5	5	5	1	5
Alternativa 3	5	2.48114	1.73481	1.54823	1.54823																				conversao sem arredondar	5	5	5	1	5
Alternativa 4	3.93455	1.83844	1	3.09611	2.36247
Alternativa 5	1.82957	1.69609	4.03204	1.76283	2.76395																	min	0.0253946				min	0.1999
Alternativa 6	2.29363	1.1574	1.76922	3.60466	2.81804															0.895194		máx	0.994604				máx	0.2
Alternativa 7	2.44487	2.23112	1.483	1.32269	4.10142																						b	-7995
																				4.12708							a	40000							http://www.calculadoraonline.com.br/sistemas-lineares
																				Weighted product method
based on SAW method	P1,1	P1,2	P1,3	P1,4	P1,5
	0.816993	0.516891	0.414452	0.511423	0.533558														1	Alternativa 1	3.63198e-06	20.9072	5
WPM weight	0.363992	0.0368975	0.0122284	0.511423	0.043242														2	Alternativa 2	1.73719e-05	100	1
	P2,1	P2,2	P2,3	P2,4	P2,5														3	Alternativa 3	6.29375e-06	36.2296	3
	0.576375	1	0.380396	0.44518	0.598855														4	Alternativa 4	4.46582e-07	2.57072	6
WPM weight	0.0636099	1	0.00796486	0.44518	0.0770208														5	Alternativa 5	8.62984e-06	49.6771	2
	P3,1	P3,2	P3,3	P3,4	P3,5														6	Alternativa 6	1.44896e-07	0.834086	7
	1	0.664596	0.430257	0.429509	0.377487														7	Alternativa 7	5.26332e-06	30.2979	4
WPM weight	1	0.129655	0.0147449	0.429509	0.00766492
	P4,1	P4,2	P4,3	P4,4	P4,5
	0.786911	0.492444	0.248014	0.858919	0.576013
WPM weight	0.301737	0.028959	0.000938376	0.858919	0.0634104
	P5,1	P5,2	P5,3	P5,4	P5,5
	0.365915	0.454313	1	0.489043	0.673901
WPM weight	0.00655993	0.0193543	1	0.489043	0.138989
	P6,1	P6,2	P6,3	P6,4	P6,5
	0.458725	0.31002	0.438789	1	0.687088
WPM weight	0.0203125	0.00286385	0.016266	1	0.153131
	P7,1	P7,2	P7,3	P7,4	P7,5
	0.488974	0.597626	0.367805	0.366939	1
WPM weight	0.0279531	0.0762339	0.00673111	0.366939	1

## Sheet: TOPSIS_Nivel_0
			Criteria A	Criteria B	Criteria C	Criteria D	Criteria E
		cópia da tabela anterior
		Alternativa 1	0.772889	0.250667	0.188	0.229778	0.313333
		Alternativa 2	0.481377	0.687681	0.154728	0.17192	0.378225
		Alternativa 3	0.994604	0.384279	0.203442	0.158232	0.158232
		Alternativa 4	0.736444	0.228552	0.0253946	0.533287	0.355525
		Alternativa 5	0.226402	0.194059	0.760064	0.210231	0.452804
		Alternativa 6	0.338844	0.0635332	0.211777	0.656509	0.46591
		Alternativa 7	0.37549	0.323699	0.142427	0.103584	0.776876
		normalizar de acordo com TOPSIS
		Alternativa 1	0.473201	0.26689	0.217935	0.245262	0.2631
		Alternativa 2	0.294723	0.732189	0.179366	0.183506	0.317588
		Alternativa 3	0.608946	0.40915	0.235836	0.168895	0.132865
		Alternativa 4	0.450888	0.243344	0.0294382	0.569224	0.298528
		Alternativa 5	0.138615	0.206619	0.881089	0.224398	0.380212
		Alternativa 6	0.207457	0.0676451	0.245498	0.700751	0.391216
		Alternativa 7	0.229894	0.344649	0.165106	0.110564	0.652329
																					Si+	Si-	Pi	Rank			Criteria A	Criteria B	Criteria C	Criteria D	Criteria E
		Alternativa 1	0.111965	0.0529417	0.0295401	0.0621872	0.0462855														0.0702701	0.202221	0.742119	2	98.8605	pesos	0.236612	0.198365	0.135546	0.253554	0.175923
		Alternativa 2	0.069735	0.145241	0.0243122	0.0465287	0.0558712														0.157213	0.176293	0.528606	5	70.4175
		Alternativa 3	0.144084	0.081161	0.0319665	0.0428242	0.023374														0.0747695	0.225116	0.750673	1	100
		Alternativa 4	0.106685	0.0482709	0.00399022	0.144329	0.0525179														0.130335	0.182139	0.582892	3	77.6493
		Alternativa 5	0.0327979	0.0409859	0.119428	0.056897	0.0668881														0.170871	0.16658	0.493642	6	65.7599
		Alternativa 6	0.0490868	0.0134184	0.0332762	0.177678	0.068824														0.185314	0.164847	0.470775	7	62.7138
		Alternativa 7	0.0543956	0.0683663	0.0223794	0.0280339	0.11476														0.140545	0.195417	0.581665	4	77.4858
		calculate ideal worst	0.0327979	0.145241	0.119428	0.177678	0.11476
		calculate ideal best	0.144084	0.0134184	0.00399022	0.0280339	0.023374

## Sheet: TOPSIS_Nivel_0 (neutral)
			Criteria A	Criteria B	Criteria C	Criteria D	Criteria E
		cópia da tabela anterior
		Alternativa 1	0.772889	0.250667	0.188	0.229778	0.313333
		Alternativa 2	0.481377	0.687681	0.154728	0.17192	0.378225
		Alternativa 3	0.994604	0.384279	0.203442	0.158232	0.158232
		Alternativa 4	0.736444	0.228552	0.0253946	0.533287	0.355525
		Alternativa 5	0.226402	0.194059	0.760064	0.210231	0.452804
		Alternativa 6	0.338844	0.0635332	0.211777	0.656509	0.46591
		Alternativa 7	0.37549	0.323699	0.142427	0.103584	0.776876
		normalizar de acordo com TOPSIS
		Alternativa 1	0.473201	0.26689	0.217935	0.245262	0.2631
		Alternativa 2	0.294723	0.732189	0.179366	0.183506	0.317588
		Alternativa 3	0.608946	0.40915	0.235836	0.168895	0.132865
		Alternativa 4	0.450888	0.243344	0.0294382	0.569224	0.298528
		Alternativa 5	0.138615	0.206619	0.881089	0.224398	0.380212
		Alternativa 6	0.207457	0.0676451	0.245498	0.700751	0.391216
		Alternativa 7	0.229894	0.344649	0.165106	0.110564	0.652329
																					Si+	Si-	Pi	Rank			Criteria A	Criteria B	Criteria C	Criteria D	Criteria E
		Alternativa 1	0.0946402	0.053378	0.043587	0.0490524	0.0526201														0.0717666	0.212339	0.747394	1	100	pesos	0.2	0.2	0.2	0.2	0.2
		Alternativa 2	0.0589446	0.146438	0.0358731	0.0367012	0.0635177														0.155213	0.189355	0.549543	5	73.5278
		Alternativa 3	0.121789	0.0818299	0.0471671	0.0337791	0.026573														0.0806543	0.227564	0.738321	2	98.786
		Alternativa 4	0.0901776	0.0486687	0.00588764	0.113845	0.0597055														0.108382	0.219478	0.669426	3	89.568
		Alternativa 5	0.0277229	0.0413237	0.176218	0.0448795	0.0760423														0.203958	0.151945	0.426928	7	57.1222
		Alternativa 6	0.0414914	0.013529	0.0490997	0.14015	0.0782432														0.157853	0.191678	0.548386	6	73.3731
		Alternativa 7	0.0459788	0.0689297	0.0330212	0.0221128	0.130466														0.142641	0.201938	0.586043	4	78.4114
		calculate ideal worst	0.0277229	0.146438	0.176218	0.14015	0.130466
		calculate ideal best	0.121789	0.013529	0.00588764	0.0221128	0.026573
