# Supplementary material
Source: Research Square preprint supplement (doi:10.21203/rs.3.rs-9567597/v1)
Supplement: Supplementary file 2 [file 36f807feb9d0bba0185cce94.xlsx]

## Sheet: AHP_nivel_0
		PROJETOS-ÂNCORA					ÁREAS DE INTERVENÇÃO & OBJETIVOS ESTRATÉGICOS
			Economia				Património natural				Território, centralidade e marca				Inclusão social			+ Qualidade de vida
			1.2. Prepara economia do futuro	1.3. Qualificação mão-de-obra necessidades atuais	1.2. Serviços do presente	1.5. Serviços e infraestruturas de apoio à atividade económica	5.1. Prevenção e mitigação de riscos (erosão, incêndios, cheias)	5.2. Patrimonio natural na otica da utilização para turismo	5.3. Patrimonio natural na otica da Utilização para lazer	5.4. Preservação de ecossistemas/limpeza/embelezamento (qualificação ambiental)	2.1. Acessibilidade e mobilidade	2.2. Afirmação da identidade territorial	2.3. Património construído	2.4. Qualidade do espaço público	3.1. Saúde e educação	3.2. Apoio a grupos vulneráveis	3.3. Inserção socioprofissional	4.2. Desporto e lazer	4.3. Cultura	4.4. Participação cívica
		Regeneração Urbana	0.875	0.0625	0.5625	0.5	0.125	0.4375	0.5	0.625	1.1875	1.625	2.0625	2.8125	0.625	1.0625	0.3125	1.8125	1.1875	0.75	17.125	0.635731
	1	Definição de critérios para as operações e obras de reabilitação e de mecanismos de incentivo ao investimento	1	0	1	0	0	0	0	1	0	1	6	6	0	2	0	1	1	1	21	0.779582
		Impacto	1		1					1		1	2	2		2		1	1	1	13
		Intensidade	1		1					1		1	3	3		1		1	1	1	14
	2	Organização e formalização de um gabinete de gestão urbanística norteador, que permita o controlo prévio das operações urbanísticas a realizar ao abrigo de cada ARU	2	0	1	2	0	0	0	0	2	1	4	4	0	1	0	1	1	0	19	0.705336
		Impacto	1		1	1					1	1	2	2		1		1	1		12
		Intensidade	2		1	2					2	1	2	2		1		1	1		15
	3	Conservação, proteção e valorização do património construído	2	1	1	0	0	0	1	0	0	6	6	1	1	4	1	2	4	0	30	1.11369
		Impacto	1	1	1				1			2	2	1	1	2	1	1	2		16
		Intensidade	2	1	1				1			3	3	1	1	2	1	2	2		20
	4	Reabilitação funcional do espaço público	0	0	0	0	0	1	1	1	6	4	2	6	2	6	0	4	2	1	36	1.33643
		Impacto						1	1	1	2	2	1	2	1	2		2	1	1	17
		Intensidade						1	1	1	3	2	2	3	2	3		2	2	1	23
	5	Revitalização, animação e valorização dos espaços públicos de circulação e/ou permanência - comum às ARU	0	0	0	0	0	0	0	0	1	6	1	4	2	2	1	4	4	4	29	1.07657
		Impacto									1	2	1	2	1	1	1	2	2	2	15
		Intensidade									1	3	1	2	2	2	1	2	2	2	18
	6	Qualificação e monitorização do sistema de drenagem de águas residuais domésticas e pluviais - Gafanha da Nazaré	0	0	0	0	2	0	0	2	0	0	2	2	1	0	0	0	0	0	9	0.334107
		Impacto					2			1			2	2	1						8
		Intensidade					1			2			1	1	1						6
	7	Acompanhamento dos processos de gestão da qualidade do ar	2	0	1	2	0	0	0	2	0	0	0	0	1	0	0	0	0	0	8	0.296984
		Impacto	1		1	2				2					1						7
		Intensidade	2		1	1				1					1						6
	8	Qualificação ambiental e urbana da zona portuária da Gafanha da Nazaré	2	0	1	2	0	0	1	2	0	0	1	1	0	0	0	0	0	0	10	0.37123
		Impacto	1		1	2			1	2			1	1							9
		Intensidade	2		1	1			1	1			1	1							8
	9	Revitalização e valorização dos espaços públicos de circulação e/ou permanência - Gafanha da Nazaré	0	0	0	0	0	0	0	0	0	2	1	2	1	1	1	4	2	4	18	0.668213
		Impacto										2	1	2	1	1	1	2	2	2	14
		Intensidade										1	1	1	1	1	1	2	1	2	11
	10	Articulação com o Projeto Aldeamento Turístico da Vista Alegre, procurando integrar as intervenções de reabilitação do Teatro, do Largo e dos arruamentos circundantes que servem o Complexo do antigo Bairro Operário	2	0	1	0	0	0	1	0	0	4	4	4	0	0	0	2	4	0	22	0.816705
		Impacto	1		1				1			2	2	2				1	2		12
		Intensidade	2		1				1			2	2	2				2	2		14
	11	Articulação das redes urbanas pedonais e cicláveis com as vias deste núcleo, de forma a garantir a plena integração deste na área urbana do Município - Vista Alegre	2	0	1	0	0	0	0	0	4	0	1	4	1	0	0	2	0	0	15	0.556845
		Impacto	1		1						2		1	2	1			2			10
		Intensidade	2		1						2		1	2	1			1			10
	12	Articulação da rede pedonal estruturante do aglomerado com o percurso pedestre, como previsto no PIMTRA - Costa Nova e Barra	0	0	0	0	0	4	4	2	4	1	0	4	1	0	0	4	0	0	24	0.890951
		Impacto						2	2	1	2	1		2	1			2			13
		Intensidade						2	2	2	2	1		2	1			2			14
	13	Intervenção no sentido de suavizar o impacto visual negativo causado pela orientação do edificado (com as traseiras viradas a poente), nomeadamente através de iniciativas de arte urbana, procurando tornar mais aprazível a passagem de quem circula sobre o passadiço ao longo do cordão dunar	0	0	0	0	0	2	0	0	0	0	1	2	0	0	0	2	0	0	7	0.259861
		Impacto						1					1	2				1			5
		Intensidade						2					1	1				2			6
	14	Dinamização do mercado tradicional da Costa Nova e implementação do projeto de reconversão do Mercado da Barra	1	0	2	2	0	0	0	0	0	1	2	1	0	0	2	1	1	0	13	0.482599
		Impacto	1		1	2						1	2	1			1	1	1		11
		Intensidade	1		2	1						1	1	1			2	1	1		11
	15	Requalificação urbana para resolver o acolhimento das autocaravanas nas praias da Barra e Costa Nova	0	0	0	0	0	0	0	0	2	0	0	2	0	0	0	2	0	0	6	0.222738
		Impacto									2			2				2			6
		Intensidade									1			1				1			3
	16	Requalificação urbana do Bairro dos Pescadores da Costa Nova	0	0	0	0	0	0	0	0	0	0	2	2	0	1	0	0	0	2	7	0.259861
		Impacto											2	2		1				1	6
		Intensidade											1	1		1				2	5
		Cultura e Criatividade	2	0.5	2	0.5	0	0.5	0.5	0	0	5	0.5	0.75	1.75	0.75	0.75	2.5	5.5	4.5	28	1.03944
	1	Promover a cooperação institucional e territorial visando ampliar e qualificar a oferta de programas culturais	1	0	1	0	0	0	0	0	0	4	0	0	1	1	0	4	6	6	24	0.890951
		Impacto	1		1							2			1	1		2	2	2	12
		Intensidade	1		1							2			1	1		2	3	3	14
	2	Projetar a identidade cultural ilhavense à escala local, regional e internacional	2	0	4	0	0	0	0	0	0	6	0	0	1	0	0	2	4	4	23	0.853828
		Impacto	2		2							2			1			2	2	2	13
		Intensidade	1		2							3			1			1	2	2	12
	3	Salvaguardar, valorizar e revitalizar os elementos imateriais do património cultural municipal, como reforço da identidade social e cultural	1	0	2	0	0	2	2	0	0	6	2	3	1	0	2	4	6	4	35	1.2993
		Impacto	1		1			1	1			2	1	1	1		1	2	2	2	16
		Intensidade	1		2			2	2			3	2	3	1		2	2	3	2	25
	4	Apostar na formação artística profissional em vários domínios, de forma articulada com a Universidade de Aveiro, enquanto centro de conhecimento	4	2	1	2	0	0	0	0	0	4	0	0	4	2	1	0	6	4	30	1.11369
		Impacto	2	2	1	2						2			2	2	1		2	2	18
		Intensidade	2	1	1	1						2			2	1	1		3	2	16
		Ílhavo Inteligente	1.5	0	1.5	0.5	0	0.5	0.5	0.25	2	1	0	0.25	2.5	2.5	1	2.5	2.5	1.5	20.5	0.761021
	1	Implementação/adaptação de um modelo municipal integrado, baseado na organização interna de informação e na interoperabilidade orientada para a prestação dos serviços públicos	2	0	2	0	0	0	0	0	1	0	0	0	2	2	1	2	2	0	14	0.519722
		Impacto	1		1						1				1	1	1	1	1		8
		Intensidade	2		2						1				2	2	1	2	2		14
	2	Desenvolvimento de uma rede de ligação entre a Administração Pública, o cidadão e as empresas	4	0	4	0	0	0	0	0	1	2	0	0	4	4	2	4	4	6	35	1.2993
		Impacto	2		2						1	2			2	2	1	2	2	2	18
		Intensidade	2		2						1	1			2	2	2	2	2	3	19
	3	Desenvolvimento de soluções de suporte ao transporte público integrado	0	0	0	2	0	2	2	1	6	2	0	1	4	4	1	4	4	0	33	1.22506
		Impacto				2		1	1	1	2	1		1	2	2	1	2	2		18
		Intensidade				1		2	2	1	3	2		1	2	2	1	2	2		21
		Ílhavo Inclusivo	1.5	1	0.75	0.75	1	0	0.25	0.75	2.5	1	2.5	2	4.5	4.5	1.25	4.5	2.5	1.5	32.75	1.21578
	1	Desenvolver estudos demográficos prospetivos – e respetiva atualização – para conhecer em permanência a dimensão e a estrutura etária da população, assim como a sua composição socioeconómica	2	0	2	0	0	0	0	0	2	0	2	2	3	3	3	3	1	0	1.35714	0.0503812
		Impacto	1		1						1		1	1	1	1	1	1	1
		Intensidade	2		2						2		2	2	3	3	3	3	1
	2	Monitorizar a oferta localizada de equipamentos escolares, de saúde, desportivos e sociais, assim como os respetivos usos	0	0	0	0	0	0	0	0	2	0	2	2	3	3	0	3	1	1	1.21429	0.0450779
		Impacto							1		1		1	1	1	1		1	1	1
		Intensidade									2		2	2	3	3		3	1	1
	3	Proceder ao redimensionamento e adequação dos equipamentos de utilização coletiva, com base nos estudos elaborados nos pontos anteriores	0	0	0	1	0	0	0	1	2	0	2	2	6	6	0	6	4	1	2.14286	0.0795492
		Impacto				1				1	1		1	1	2	2		2	2	1
		Intensidade				1				1	2		2	2	3	3		3	2	1
	4	Otimizar a utilização dos equipamentos de utilização coletiva, assegurando uma rede integrada de serviços de interesse geral (SIG), com base nos estudos elaborados	4	4	1	2	4	0	1	2	4	4	4	2	6	6	2	6	4	4	3.5	0.12993
		Impacto	2	2	1	1	2		1	1	2	2	2	1	2	2	2	2	2	2
		Intensidade	2	2	1	2	2		1	2	2	2	2	2	3	3	1	3	2	2
		Parque Central de Ílhavo	0	0	0.5	0.25	0.25	1.5	2.25	1.25	1	3.25	0.25	2.5	3.25	1.5	0.75	4.5	1	2.25	26.25	0.974478
	1	Definição de um modelo de gestão sustentável em função dos agentes envolvidos e dos usos previstos no Plano de Intervenção em Espaço Rural (PIER)	0	0	1	0	1	2	3	1	2	3	0	3	3	1	0	3	1	4	28	1.03944
		Impacto			1		1	1	1	1	1	1		1	1	1		1	1	2	14
		Intensidade			1		1	2	3	1	2	3		3	3	1		3	1	2	26
	2	Requalificação da área da ex-Colónia Agrícola da Gafanha: construção do Parque Municipal de Desporto e Lazer da Senhora dos Campos	0	0	1	0	0	4	6	4	2	4	1	4	4	2	2	6	2	2	44	1.63341
		Impacto			1			2	2	2	2	2	1	2	2	2	2	2	2	1	25
		Intensidade			1			2	3	2	1	2	1	2	2	1	1	3	1	2	24
	3	Identificar as ações e atividades com potencial para a dinamização da área de intervenção	0	0	0	1	0	0	0	0	0	2	0	2	2	1	1	3	1	1	14	0.519722
		Impacto				1						1		1	1	1	1	1	1	1	9
		Intensidade				1						2		2	2	1	1	3	1	1	14
	4	Dinamizar, de forma articulada com outros equipamentos desportivos, as estruturas desportivas do Parque Central de Ílhavo, em conjugação com o projeto Ílhavo um Município inclusivo	0	0	0	0	0	0	0	0	0	4	0	1	4	2	0	6	0	2	19	0.705336
		Impacto										2		1	2	2		2		2	11
		Intensidade										2		1	2	1		3		1	10
		Mar e Ria	3	0	1.5	0.5	3	3	3	3	1	6	0	1.5	1.5	0	0	4	1.5	4	36.5	1.35499
	1	Dinamizar a reformulação de uma estratégia de intervenção para a Ria de Aveiro e acompanhar a sua implementação	2	0	1	0	3	3	3	3	2	6	0	3	2	0	0	2	1	4	35	1.2993
		Impacto	1		1		1	1	1	1	1	2		1	1			1	1	2	15
		Intensidade	2		1		3	3	3	3	2	3		3	2			2	1	2	30
	2	Consubstanciar uma estratégia e um modelo de gestão que articulem as responsabilidades dos diversos agentes e entidades que intervêm no território da Ria	4	0	2	1	3	3	3	3	0	6	0	0	1	0	0	6	2	4	38	1.41067
		Impacto	2		2	1	1	1	1	1		2			1			2	2	2	18
		Intensidade	2		1	1	3	3	3	3		3			1			3	1	2	26
		Turismo de Futuro	1.5	2	3	3	0.5	4.5	3.5	1.5	1.5	4.5	2	3	1	0	0	4.5	4.5	1.5	42	1.55916
	1	Realizar estudos de pesquisa de segmentos de mercado e nichos, para definir estrategicamente os públicos-alvo e o modo de os alcançar e atrair	1	2	2	2	1	3	3	1	1	3	2	2	1	0	0	3	3	1	31	1.15081
		Impacto	1	1	1	1	1	1	1	1	1	1	1	1	1			1	1	1	16
		Intensidade	1	2	2	2	1	3	3	1	1	3	2	2	1			3	3	1	31
	2	Definir as ações e as medidas para adequar a oferta turística do Município aos diferentes públicos-alvo estratégicos a atrair	2	2	4	4	0	6	4	2	2	6	2	4	1	0	0	6	6	2	53	1.96752
		Impacto	2	1	2	2		2	2	1	2	2	2	2	1			2	2	2	27
		Intensidade	1	2	2	2		3	2	2	1	3	1	2	1			3	3	1	29
		Valorização de Capital Humano	5	5	4	3	1	0	0	1	0.5	0.5	0.5	0	2.5	0	3.25	0	0	1	27.25	1.0116
	1	Apostar em instrumentos de articulação do plano de valorização de capital humano com os Municípios vizinhos e ao nível da CIRA, através de um modelo de monitorização	4	6	4	2	0	0	0	0	0	0	0	0	2	0	2	0	0	0	20	0.742459
		Impacto	2	2	2	1									2		2				11
		Intensidade	2	3	2	2									1		1				11
	2	Identificar as necessidades atuais e futuras de conhecimento especializado adequadas ao tecido produtivo do Município	6	6	4	2	1	0	0	1	0	0	0	0	2	0	3	0	0	0	25	0.928074
		Impacto	2	2	2	1	1			1					1		1				11
		Intensidade	3	3	2	2	1			1					2		3				17
	3	Desenvolver um plano integrado de valorização de capital humano, visando a formação de recursos humanos adequados às necessidades do tecido produtivo	4	6	4	4	0	0	0	0	0	0	0	0	4	0	6	0	0	2	30	1.11369
		Impacto	2	2	2	2									2		2			1	13
		Intensidade	2	3	2	2									2		3			2	16
	4	Promover a ligação ao Sistema Científico e Tecnológico, fortalecendo as sinergias entre os centros de conhecimento, as unidades para transferência de tecnologia e as empresas, garantindo as dinâmicas de funcionamento em rede ao nível da Região	6	2	4	4	3	0	0	3	2	2	2	0	2	0	2	0	0	2	34	1.26218
		Impacto	2	1	2	2	1			1	1	1	1		1		1			1	15
		Intensidade	3	2	2	2	3			3	2	2	2		2		2			2	27
		Economia + Competitiva	4.25	1.5	4.25	4	0	0	0	0.25	1	1.5	0	0	0.5	0	1	0	0	0.25	18.5	0.686775
	1	Definir cenários económicos de desenvolvimento setorial, articulando o dinamismo recente na criação de emprego e as atividades económicas de futuro	6	6	6	2	0	0	0	0	0	4	0	0	2	0	2	0	0	1	29	1.07657
		Impacto	2	2	2	1						2			1		1			1	12
		Intensidade	3	3	3	2						2			2		2			1	18
	2	Otimizar e dinamizar as estruturas físicas de suporte ao tecido económico, definindo a vocação dos polos empresariais e industriais	4	0	4	6	0	0	0	0	0	1	0	0	0	0	0	0	0	0	15	0.556845
		Impacto	2		2	2						1									7
		Intensidade	2		2	3						1									8
	3	Definir a função dos eixos viários estruturantes de suporte ao desenvolvimento do tecido produtivo, enquadrando Ílhavo numa perspetiva regional	1	0	1	6	0	0	0	1	4	0	0	0	0	0	0	0	0	0	13	0.482599
		Impacto	1		1	2				1	2										7
		Intensidade	1		1	3				1	2										8
	4	Criação de incentivos para captação de investimento e novas empresas, assim como para a preservação e ajustamento das empresas já existentes	6	0	6	2	0	0	0	0	0	1	0	0	0	0	2	0	0	0	17	0.63109
		Impacto	2		2	2						1					1				8
		Intensidade	3		3	1						1					2				10
		Ílhavo e o Porto de Aveiro	4	0.5	2.5	2	0.5	1	0.5	0.5	0	3	1	2	1	0	1	0.5	0.5	0	20.5	0.761021
	1	Potenciar o Porto de Aveiro enquanto polo dinamizador da economia local e regional e gerador de emprego qualificado	6	1	4	2	0	0	0	0	0	2	0	0	1	0	2	0	1	0	0.428571
		Impacto	2	1	2	2						1			1		2		1
		Intensidade	3	1	2	1						2			1		1		1
	2	Enquadrar a área do Porto de Aveiro e sua envolvente	2	0	1	2	1	2	1	1	0	4	2	4	1	0	0	1	0	0	1.21429
		Impacto	1		1	2	1	2	1	1		2	2	2	1			1
		Intensidade	2		1	1	1	1	1	1		2	1	2	1			1
			23.625	10.5625	20.5625	15	6.375	11.4375	11	9.125	10.6875	27.375	8.8125	14.8125	19.125	10.3125	9.3125	24.8125	19.1875	17.25	26.9375	1	0.445094
		valor dos impactos se os critérios do nivel 1 tivessem o mesmo peso																							soma dos impactos se os critérios do nível 1 tivessem o mesmo impacto. Esta operaçao foi para converter a matriz de impactos a ser usada com apenas o nivel 0
		Regeneração Urbana	1.391	0.0993572	0.894215	0.794858	0.198714	0.695501	0.794858	0.993572	1.88779	2.58329	3.27879	4.47107	0.993572	1.68907	0.496786	2.88136	1.88779	1.19229	1.51244				3.17943	2.68264	12.2209	3.17943	5.96143
		Cultura e Criatividade	1.8208	0.455201	1.8208	0.455201		0.455201	0.455201			4.55201	0.455201	0.682801	1.5932	0.682801	0.682801	2.276	5.00721	4.0968	1.41618				4.55201	0.910401	5.69001	2.9588	11.38
		Ílhavo Inteligente	1.84079		1.84079	0.613598		0.613598	0.613598	0.306799	2.45439	1.2272		0.306799	3.06799	3.06799	1.2272	3.06799	3.06799	1.84079	1.39764				4.29519	1.53399	3.98839	7.36318	7.97677
		Ílhavo Inclusivo	1.16426	0.776175	0.582131	0.582131	0.776175		0.194044	0.582131	1.94044	0.776175	1.94044	1.55235	3.49279	3.49279	0.970219	3.49279	1.94044	1.16426	1.41221				3.1047	1.55235	6.2094	7.9558	6.59749
		Parque Central de Ílhavo			0.493546	0.246773	0.246773	1.48064	2.22096	1.23387	0.987092	3.20805	0.246773	2.46773	3.20805	1.48064	0.740319	4.44192	0.987092	2.22096	1.43951				0.740319	5.18224	6.90965	5.42901	7.64997
		Mar e Ria	2.26089		1.13045	0.376815	2.26089	2.26089	2.26089	2.26089	0.753631	4.52178		1.13045	1.13045			3.01452	1.13045	3.01452	1.5282				3.76815	9.04357	6.40586	1.13045	7.15949
		Turismo de Futuro	0.990682	1.32091	1.98136	1.98136	0.330227	2.97205	2.31159	0.990682	0.990682	2.97205	1.32091	1.98136	0.660455			2.97205	2.97205	0.990682	1.54106				6.27432	6.60455	7.265	0.660455	6.93477
		Valorização de Capital Humano	5.13065	5.13065	4.10452	3.07839	1.02613			1.02613	0.513065	0.513065	0.513065		2.56532		3.33492			1.02613	1.55345				17.4442	2.05226	1.53919	5.90025	1.02613
		Economia + Competitiva	6.74154	2.37937	6.74154	6.34498				0.396561	1.58624	2.37937			0.793122		1.58624			0.396561	1.63031				22.2074	0.396561	3.96561	2.37937	0.396561
		Ílhavo e o Porto de Aveiro	5.63178	0.703973	3.51986	2.81589	0.703973	1.40795	0.703973	0.703973		4.22384	1.40795	2.81589	1.40795		1.40795	0.703973	0.703973		1.60349				12.6715	3.51986	8.44767	2.81589	1.40795
		Matriz para calcular apenas com nível 0						se os critérios do nivel 0 valerem todos o mesmo -->	0.2	0.2	0.2	0.2	0.2
		Nível 0	0.2112	0.1964	0.1745	0.2067	0.2112																		projeto * nivel1
																							Media se todos criterios valessem o mesmo (considera o nivel 0)		Racio de redestribuição					resultados exercicio
		Regeneração Urbana	0.635886	0.536529	2.44419	0.635886	1.19229															5.44478	5.44478		0.994056						0.2112	0.1964	0.1745	0.2067	0.2112
		Cultura e Criatividade	0.910401	0.18208	1.138	0.591761	2.276															5.09825	5.09825		1.06162						0.284	0.2172	0.2222	0.2766
		Ílhavo Inteligente	0.859037	0.306799	0.797677	1.47264	1.59535															5.0315	5.0315		1.0757						0.2678	0.238	0.2253	0.2689
		Ílhavo Inclusivo	0.62094	0.31047	1.24188	1.59116	1.3195															5.08395	5.08395		1.06461						0.3113	0.2313	0.2354	0.2221
		Parque Central de Ílhavo	0.148064	1.03645	1.38193	1.0858	1.52999															5.18224	5.18224		1.04442						0.3937	0.3054	0.3009
		Mar e Ria	0.753631	1.80871	1.28117	0.226089	1.4319															5.5015	5.5015		0.983806						0.2983	0.3311	0.3706
		Turismo de Futuro	1.25486	1.32091	1.453	0.132091	1.38695															5.54782	5.54782		0.975593
		Valorização de Capital Humano	3.48884	0.410452	0.307839	1.18005	0.205226															5.59241	5.59241		0.967814
		Economia + Competitiva	4.44148	0.0793122	0.793122	0.475873	0.0793122															5.8691	5.8691		0.922187
		Ílhavo e o Porto de Aveiro	2.5343	0.703973	1.68953	0.563178	0.281589															5.77258	5.77258		0.937608
																						5.41241	5.41241		1.00274
		esta é que é a matriz usada nos diversos MCDM!
		Regeneração Urbana	0.632107	0.53334	2.42966	0.632107	1.1852															5.41241	1.08248
		Cultura e Criatividade	0.966502	0.1933	1.20813	0.628226	2.41626															5.41241	1.08248
		Ílhavo Inteligente	0.92407	0.330025	0.858065	1.58412	1.71613															5.41241	1.08248
		Ílhavo Inclusivo	0.661058	0.330529	1.32212	1.69396	1.40475															5.41241	1.08248
		Parque Central de Ílhavo	0.15464	1.08248	1.44331	1.13403	1.59795															5.41241	1.08248
		Mar e Ria	0.741426	1.77942	1.26042	0.222428	1.40871															5.41241	1.08248
		Turismo de Futuro	1.22424	1.28867	1.41754	0.128867	1.3531															5.41241	1.08248
		Valorização de Capital Humano	3.37655	0.397241	0.297931	1.14207	0.198621															5.41241	1.08248
		Economia + Competitiva	4.09588	0.0731407	0.731407	0.438844	0.0731407															5.41241	1.08248
		Ílhavo e o Porto de Aveiro	2.37618	0.66005	1.58412	0.52804	0.26402															5.41241	1.08248
																								Order	Rank
		Regeneração Urbana	0.133501	0.104748	0.423976	0.130656	0.250314														1.0432			93.047	10
		Cultura e Criatividade	0.204125	0.0379642	0.210818	0.129854	0.510313														1.09308			97.496	4
		Ílhavo Inteligente	0.195164	0.0648169	0.149732	0.327438	0.362447														1.0996			98.0777	3
		Ílhavo Inclusivo	0.139615	0.0649159	0.230709	0.350142	0.296683														1.08207			96.514	5
		Parque Central de Ílhavo	0.03266	0.2126	0.251858	0.234404	0.337487														1.06901			95.3493	9
		Mar e Ria	0.156589	0.349479	0.219944	0.0459758	0.29752														1.06951			95.3939	8
		Turismo de Futuro	0.258559	0.253095	0.24736	0.0266368	0.285775														1.07143			95.565	7
		Valorização de Capital Humano	0.713127	0.0780182	0.0519889	0.236066	0.0419487														1.12115			100	1
		Economia + Competitiva	0.86505	0.0143648	0.127631	0.0907091	0.0154473														1.1132			99.2911	2
		Ílhavo e o Porto de Aveiro	0.501849	0.129634	0.276429	0.109146	0.055761														1.07282			95.6893	6
																					1.0835
		teste com potencia (em vez de multiplicar o impacto do projeto com o peso do criterio)
		Regeneração Urbana	0.907668	0.88386	1.16756	0.909543	1.03654														4.90516			98.4572	4
		Cultura e Criatividade	0.99283	0.724129	1.03354	0.908386	1.20481														4.8637			97.625	7
		Ílhavo Inteligente	0.98346	0.804345	0.973642	1.09976	1.12082														4.98203			100	1
		Ílhavo Inclusivo	0.916293	0.804587	1.04993	1.1151	1.07442														4.96033			99.5645	2
		Parque Central de Ílhavo	0.674194	1.01569	1.06613	1.02634	1.10406														4.88641			98.0807	5
		Mar e Ria	0.938768	1.11984	1.04121	0.732933	1.07506														4.90781			98.5103	3
		Turismo de Futuro	1.04366	1.05107	1.06278	0.654736	1.06595														4.87819			97.9158	6
		Valorização de Capital Humano	1.29304	0.834169	0.80953	1.02784	0.710792														4.67538			93.8449	9
		Economia + Competitiva	1.34688	0.598303	0.946882	0.843462	0.575586														4.31111			86.5332	10
		Ílhavo e o Porto de Aveiro	1.20057	0.921648	1.08359	0.876345	0.754831														4.83697			97.0885	8
																					4.82071
									Economia	Patrimonio natural	Territorio	Inclusao	Qualidade
			0.2112	0.1964	0.1745	0.2067	0.2112		100	92.9924	82.6231	97.8693	100
			0.284	0.2172	0.2222	0.2766			100	76.4789	78.2394	97.3944
			0.2678	0.238	0.2253	0.2689			99.5909	88.5087	83.7858	100
			0.3113	0.2313	0.2354	0.2221			100	74.3013	75.6184	71.346
			0.3937	0.3054	0.3009				100	77.5718	76.4288
			0.2983	0.3311	0.3706				80.4911	89.3416	100
			0.2	0.2	0.2	0.2	0.2
			0.25	0.25	0.25	0.25
			0.25	0.25	0.25	0.25
			0.25	0.25	0.25	0.25
			0.33	0.33	0.33
			0.33	0.33	0.33
			0.3	0.25	0.2	0.1	0.15
			0.3	0.15	0.4	0.15
			0.15	0.4	0.3	0.15
			0.25	0.3	0.2	0.25
			0.3	0.3	0.4
			0.4	0.4	0.2
			quando são os pesos todos iguais
			0.25	0.25	0.25	0.25	0.25	0.25	0.25	0.25	0.25	0.25	0.25	0.25	0.333333	0.333333	0.333333	0.333333	0.333333	0.333333
			0.2112				0.1964				0.1745				0.2067			0.2112
			0.284	0.2172	0.2222	0.2766	0.2678	0.238	0.2253	0.2689	0.3113	0.2313	0.2354	0.2221	0.3937	0.3054	0.3009	0.2983	0.3311	0.3706

## Sheet: AHP_nivel_0 (neutral)
		PROJETOS-ÂNCORA					ÁREAS DE INTERVENÇÃO & OBJETIVOS ESTRATÉGICOS
			Economia				Património natural				Território, centralidade e marca				Inclusão social			+ Qualidade de vida
			1.2. Prepara economia do futuro	1.3. Qualificação mão-de-obra necessidades atuais	1.2. Serviços do presente	1.5. Serviços e infraestruturas de apoio à atividade económica	5.1. Prevenção e mitigação de riscos (erosão, incêndios, cheias)	5.2. Patrimonio natural na otica da utilização para turismo	5.3. Patrimonio natural na otica da Utilização para lazer	5.4. Preservação de ecossistemas/limpeza/embelezamento (qualificação ambiental)	2.1. Acessibilidade e mobilidade	2.2. Afirmação da identidade territorial	2.3. Património construído	2.4. Qualidade do espaço público	3.1. Saúde e educação	3.2. Apoio a grupos vulneráveis	3.3. Inserção socioprofissional	4.2. Desporto e lazer	4.3. Cultura	4.4. Participação cívica
		Regeneração Urbana	0.875	0.0625	0.5625	0.5	0.125	0.4375	0.5	0.625	1.1875	1.625	2.0625	2.8125	0.625	1.0625	0.3125	1.8125	1.1875	0.75	17.125	0.635731
	1	Definição de critérios para as operações e obras de reabilitação e de mecanismos de incentivo ao investimento	1	0	1	0	0	0	0	1	0	1	6	6	0	2	0	1	1	1	21	0.779582
		Impacto	1		1					1		1	2	2		2		1	1	1	13
		Intensidade	1		1					1		1	3	3		1		1	1	1	14
	2	Organização e formalização de um gabinete de gestão urbanística norteador, que permita o controlo prévio das operações urbanísticas a realizar ao abrigo de cada ARU	2	0	1	2	0	0	0	0	2	1	4	4	0	1	0	1	1	0	19	0.705336
		Impacto	1		1	1					1	1	2	2		1		1	1		12
		Intensidade	2		1	2					2	1	2	2		1		1	1		15
	3	Conservação, proteção e valorização do património construído	2	1	1	0	0	0	1	0	0	6	6	1	1	4	1	2	4	0	30	1.11369
		Impacto	1	1	1				1			2	2	1	1	2	1	1	2		16
		Intensidade	2	1	1				1			3	3	1	1	2	1	2	2		20
	4	Reabilitação funcional do espaço público	0	0	0	0	0	1	1	1	6	4	2	6	2	6	0	4	2	1	36	1.33643
		Impacto						1	1	1	2	2	1	2	1	2		2	1	1	17
		Intensidade						1	1	1	3	2	2	3	2	3		2	2	1	23
	5	Revitalização, animação e valorização dos espaços públicos de circulação e/ou permanência - comum às ARU	0	0	0	0	0	0	0	0	1	6	1	4	2	2	1	4	4	4	29	1.07657
		Impacto									1	2	1	2	1	1	1	2	2	2	15
		Intensidade									1	3	1	2	2	2	1	2	2	2	18
	6	Qualificação e monitorização do sistema de drenagem de águas residuais domésticas e pluviais - Gafanha da Nazaré	0	0	0	0	2	0	0	2	0	0	2	2	1	0	0	0	0	0	9	0.334107
		Impacto					2			1			2	2	1						8
		Intensidade					1			2			1	1	1						6
	7	Acompanhamento dos processos de gestão da qualidade do ar	2	0	1	2	0	0	0	2	0	0	0	0	1	0	0	0	0	0	8	0.296984
		Impacto	1		1	2				2					1						7
		Intensidade	2		1	1				1					1						6
	8	Qualificação ambiental e urbana da zona portuária da Gafanha da Nazaré	2	0	1	2	0	0	1	2	0	0	1	1	0	0	0	0	0	0	10	0.37123
		Impacto	1		1	2			1	2			1	1							9
		Intensidade	2		1	1			1	1			1	1							8
	9	Revitalização e valorização dos espaços públicos de circulação e/ou permanência - Gafanha da Nazaré	0	0	0	0	0	0	0	0	0	2	1	2	1	1	1	4	2	4	18	0.668213
		Impacto										2	1	2	1	1	1	2	2	2	14
		Intensidade										1	1	1	1	1	1	2	1	2	11
	10	Articulação com o Projeto Aldeamento Turístico da Vista Alegre, procurando integrar as intervenções de reabilitação do Teatro, do Largo e dos arruamentos circundantes que servem o Complexo do antigo Bairro Operário	2	0	1	0	0	0	1	0	0	4	4	4	0	0	0	2	4	0	22	0.816705
		Impacto	1		1				1			2	2	2				1	2		12
		Intensidade	2		1				1			2	2	2				2	2		14
	11	Articulação das redes urbanas pedonais e cicláveis com as vias deste núcleo, de forma a garantir a plena integração deste na área urbana do Município - Vista Alegre	2	0	1	0	0	0	0	0	4	0	1	4	1	0	0	2	0	0	15	0.556845
		Impacto	1		1						2		1	2	1			2			10
		Intensidade	2		1						2		1	2	1			1			10
	12	Articulação da rede pedonal estruturante do aglomerado com o percurso pedestre, como previsto no PIMTRA - Costa Nova e Barra	0	0	0	0	0	4	4	2	4	1	0	4	1	0	0	4	0	0	24	0.890951
		Impacto						2	2	1	2	1		2	1			2			13
		Intensidade						2	2	2	2	1		2	1			2			14
	13	Intervenção no sentido de suavizar o impacto visual negativo causado pela orientação do edificado (com as traseiras viradas a poente), nomeadamente através de iniciativas de arte urbana, procurando tornar mais aprazível a passagem de quem circula sobre o passadiço ao longo do cordão dunar	0	0	0	0	0	2	0	0	0	0	1	2	0	0	0	2	0	0	7	0.259861
		Impacto						1					1	2				1			5
		Intensidade						2					1	1				2			6
	14	Dinamização do mercado tradicional da Costa Nova e implementação do projeto de reconversão do Mercado da Barra	1	0	2	2	0	0	0	0	0	1	2	1	0	0	2	1	1	0	13	0.482599
		Impacto	1		1	2						1	2	1			1	1	1		11
		Intensidade	1		2	1						1	1	1			2	1	1		11
	15	Requalificação urbana para resolver o acolhimento das autocaravanas nas praias da Barra e Costa Nova	0	0	0	0	0	0	0	0	2	0	0	2	0	0	0	2	0	0	6	0.222738
		Impacto									2			2				2			6
		Intensidade									1			1				1			3
	16	Requalificação urbana do Bairro dos Pescadores da Costa Nova	0	0	0	0	0	0	0	0	0	0	2	2	0	1	0	0	0	2	7	0.259861
		Impacto											2	2		1				1	6
		Intensidade											1	1		1				2	5
		Cultura e Criatividade	2	0.5	2	0.5	0	0.5	0.5	0	0	5	0.5	0.75	1.75	0.75	0.75	2.5	5.5	4.5	28	1.03944
	1	Promover a cooperação institucional e territorial visando ampliar e qualificar a oferta de programas culturais	1	0	1	0	0	0	0	0	0	4	0	0	1	1	0	4	6	6	24	0.890951
		Impacto	1		1							2			1	1		2	2	2	12
		Intensidade	1		1							2			1	1		2	3	3	14
	2	Projetar a identidade cultural ilhavense à escala local, regional e internacional	2	0	4	0	0	0	0	0	0	6	0	0	1	0	0	2	4	4	23	0.853828
		Impacto	2		2							2			1			2	2	2	13
		Intensidade	1		2							3			1			1	2	2	12
	3	Salvaguardar, valorizar e revitalizar os elementos imateriais do património cultural municipal, como reforço da identidade social e cultural	1	0	2	0	0	2	2	0	0	6	2	3	1	0	2	4	6	4	35	1.2993
		Impacto	1		1			1	1			2	1	1	1		1	2	2	2	16
		Intensidade	1		2			2	2			3	2	3	1		2	2	3	2	25
	4	Apostar na formação artística profissional em vários domínios, de forma articulada com a Universidade de Aveiro, enquanto centro de conhecimento	4	2	1	2	0	0	0	0	0	4	0	0	4	2	1	0	6	4	30	1.11369
		Impacto	2	2	1	2						2			2	2	1		2	2	18
		Intensidade	2	1	1	1						2			2	1	1		3	2	16
		Ílhavo Inteligente	1.5	0	1.5	0.5	0	0.5	0.5	0.25	2	1	0	0.25	2.5	2.5	1	2.5	2.5	1.5	20.5	0.761021
	1	Implementação/adaptação de um modelo municipal integrado, baseado na organização interna de informação e na interoperabilidade orientada para a prestação dos serviços públicos	2	0	2	0	0	0	0	0	1	0	0	0	2	2	1	2	2	0	14	0.519722
		Impacto	1		1						1				1	1	1	1	1		8
		Intensidade	2		2						1				2	2	1	2	2		14
	2	Desenvolvimento de uma rede de ligação entre a Administração Pública, o cidadão e as empresas	4	0	4	0	0	0	0	0	1	2	0	0	4	4	2	4	4	6	35	1.2993
		Impacto	2		2						1	2			2	2	1	2	2	2	18
		Intensidade	2		2						1	1			2	2	2	2	2	3	19
	3	Desenvolvimento de soluções de suporte ao transporte público integrado	0	0	0	2	0	2	2	1	6	2	0	1	4	4	1	4	4	0	33	1.22506
		Impacto				2		1	1	1	2	1		1	2	2	1	2	2		18
		Intensidade				1		2	2	1	3	2		1	2	2	1	2	2		21
		Ílhavo Inclusivo	1.5	1	0.75	0.75	1	0	0.25	0.75	2.5	1	2.5	2	4.5	4.5	1.25	4.5	2.5	1.5	32.75	1.21578
	1	Desenvolver estudos demográficos prospetivos – e respetiva atualização – para conhecer em permanência a dimensão e a estrutura etária da população, assim como a sua composição socioeconómica	2	0	2	0	0	0	0	0	2	0	2	2	3	3	3	3	1	0	1.35714	0.0503812
		Impacto	1		1						1		1	1	1	1	1	1	1
		Intensidade	2		2						2		2	2	3	3	3	3	1
	2	Monitorizar a oferta localizada de equipamentos escolares, de saúde, desportivos e sociais, assim como os respetivos usos	0	0	0	0	0	0	0	0	2	0	2	2	3	3	0	3	1	1	1.21429	0.0450779
		Impacto							1		1		1	1	1	1		1	1	1
		Intensidade									2		2	2	3	3		3	1	1
	3	Proceder ao redimensionamento e adequação dos equipamentos de utilização coletiva, com base nos estudos elaborados nos pontos anteriores	0	0	0	1	0	0	0	1	2	0	2	2	6	6	0	6	4	1	2.14286	0.0795492
		Impacto				1				1	1		1	1	2	2		2	2	1
		Intensidade				1				1	2		2	2	3	3		3	2	1
	4	Otimizar a utilização dos equipamentos de utilização coletiva, assegurando uma rede integrada de serviços de interesse geral (SIG), com base nos estudos elaborados	4	4	1	2	4	0	1	2	4	4	4	2	6	6	2	6	4	4	3.5	0.12993
		Impacto	2	2	1	1	2		1	1	2	2	2	1	2	2	2	2	2	2
		Intensidade	2	2	1	2	2		1	2	2	2	2	2	3	3	1	3	2	2
		Parque Central de Ílhavo	0	0	0.5	0.25	0.25	1.5	2.25	1.25	1	3.25	0.25	2.5	3.25	1.5	0.75	4.5	1	2.25	26.25	0.974478
	1	Definição de um modelo de gestão sustentável em função dos agentes envolvidos e dos usos previstos no Plano de Intervenção em Espaço Rural (PIER)	0	0	1	0	1	2	3	1	2	3	0	3	3	1	0	3	1	4	28	1.03944
		Impacto			1		1	1	1	1	1	1		1	1	1		1	1	2	14
		Intensidade			1		1	2	3	1	2	3		3	3	1		3	1	2	26
	2	Requalificação da área da ex-Colónia Agrícola da Gafanha: construção do Parque Municipal de Desporto e Lazer da Senhora dos Campos	0	0	1	0	0	4	6	4	2	4	1	4	4	2	2	6	2	2	44	1.63341
		Impacto			1			2	2	2	2	2	1	2	2	2	2	2	2	1	25
		Intensidade			1			2	3	2	1	2	1	2	2	1	1	3	1	2	24
	3	Identificar as ações e atividades com potencial para a dinamização da área de intervenção	0	0	0	1	0	0	0	0	0	2	0	2	2	1	1	3	1	1	14	0.519722
		Impacto				1						1		1	1	1	1	1	1	1	9
		Intensidade				1						2		2	2	1	1	3	1	1	14
	4	Dinamizar, de forma articulada com outros equipamentos desportivos, as estruturas desportivas do Parque Central de Ílhavo, em conjugação com o projeto Ílhavo um Município inclusivo	0	0	0	0	0	0	0	0	0	4	0	1	4	2	0	6	0	2	19	0.705336
		Impacto										2		1	2	2		2		2	11
		Intensidade										2		1	2	1		3		1	10
		Mar e Ria	3	0	1.5	0.5	3	3	3	3	1	6	0	1.5	1.5	0	0	4	1.5	4	36.5	1.35499
	1	Dinamizar a reformulação de uma estratégia de intervenção para a Ria de Aveiro e acompanhar a sua implementação	2	0	1	0	3	3	3	3	2	6	0	3	2	0	0	2	1	4	35	1.2993
		Impacto	1		1		1	1	1	1	1	2		1	1			1	1	2	15
		Intensidade	2		1		3	3	3	3	2	3		3	2			2	1	2	30
	2	Consubstanciar uma estratégia e um modelo de gestão que articulem as responsabilidades dos diversos agentes e entidades que intervêm no território da Ria	4	0	2	1	3	3	3	3	0	6	0	0	1	0	0	6	2	4	38	1.41067
		Impacto	2		2	1	1	1	1	1		2			1			2	2	2	18
		Intensidade	2		1	1	3	3	3	3		3			1			3	1	2	26
		Turismo de Futuro	1.5	2	3	3	0.5	4.5	3.5	1.5	1.5	4.5	2	3	1	0	0	4.5	4.5	1.5	42	1.55916
	1	Realizar estudos de pesquisa de segmentos de mercado e nichos, para definir estrategicamente os públicos-alvo e o modo de os alcançar e atrair	1	2	2	2	1	3	3	1	1	3	2	2	1	0	0	3	3	1	31	1.15081
		Impacto	1	1	1	1	1	1	1	1	1	1	1	1	1			1	1	1	16
		Intensidade	1	2	2	2	1	3	3	1	1	3	2	2	1			3	3	1	31
	2	Definir as ações e as medidas para adequar a oferta turística do Município aos diferentes públicos-alvo estratégicos a atrair	2	2	4	4	0	6	4	2	2	6	2	4	1	0	0	6	6	2	53	1.96752
		Impacto	2	1	2	2		2	2	1	2	2	2	2	1			2	2	2	27
		Intensidade	1	2	2	2		3	2	2	1	3	1	2	1			3	3	1	29
		Valorização de Capital Humano	5	5	4	3	1	0	0	1	0.5	0.5	0.5	0	2.5	0	3.25	0	0	1	27.25	1.0116
	1	Apostar em instrumentos de articulação do plano de valorização de capital humano com os Municípios vizinhos e ao nível da CIRA, através de um modelo de monitorização	4	6	4	2	0	0	0	0	0	0	0	0	2	0	2	0	0	0	20	0.742459
		Impacto	2	2	2	1									2		2				11
		Intensidade	2	3	2	2									1		1				11
	2	Identificar as necessidades atuais e futuras de conhecimento especializado adequadas ao tecido produtivo do Município	6	6	4	2	1	0	0	1	0	0	0	0	2	0	3	0	0	0	25	0.928074
		Impacto	2	2	2	1	1			1					1		1				11
		Intensidade	3	3	2	2	1			1					2		3				17
	3	Desenvolver um plano integrado de valorização de capital humano, visando a formação de recursos humanos adequados às necessidades do tecido produtivo	4	6	4	4	0	0	0	0	0	0	0	0	4	0	6	0	0	2	30	1.11369
		Impacto	2	2	2	2									2		2			1	13
		Intensidade	2	3	2	2									2		3			2	16
	4	Promover a ligação ao Sistema Científico e Tecnológico, fortalecendo as sinergias entre os centros de conhecimento, as unidades para transferência de tecnologia e as empresas, garantindo as dinâmicas de funcionamento em rede ao nível da Região	6	2	4	4	3	0	0	3	2	2	2	0	2	0	2	0	0	2	34	1.26218
		Impacto	2	1	2	2	1			1	1	1	1		1		1			1	15
		Intensidade	3	2	2	2	3			3	2	2	2		2		2			2	27
		Economia + Competitiva	4.25	1.5	4.25	4	0	0	0	0.25	1	1.5	0	0	0.5	0	1	0	0	0.25	18.5	0.686775
	1	Definir cenários económicos de desenvolvimento setorial, articulando o dinamismo recente na criação de emprego e as atividades económicas de futuro	6	6	6	2	0	0	0	0	0	4	0	0	2	0	2	0	0	1	29	1.07657
		Impacto	2	2	2	1						2			1		1			1	12
		Intensidade	3	3	3	2						2			2		2			1	18
	2	Otimizar e dinamizar as estruturas físicas de suporte ao tecido económico, definindo a vocação dos polos empresariais e industriais	4	0	4	6	0	0	0	0	0	1	0	0	0	0	0	0	0	0	15	0.556845
		Impacto	2		2	2						1									7
		Intensidade	2		2	3						1									8
	3	Definir a função dos eixos viários estruturantes de suporte ao desenvolvimento do tecido produtivo, enquadrando Ílhavo numa perspetiva regional	1	0	1	6	0	0	0	1	4	0	0	0	0	0	0	0	0	0	13	0.482599
		Impacto	1		1	2				1	2										7
		Intensidade	1		1	3				1	2										8
	4	Criação de incentivos para captação de investimento e novas empresas, assim como para a preservação e ajustamento das empresas já existentes	6	0	6	2	0	0	0	0	0	1	0	0	0	0	2	0	0	0	17	0.63109
		Impacto	2		2	2						1					1				8
		Intensidade	3		3	1						1					2				10
		Ílhavo e o Porto de Aveiro	4	0.5	2.5	2	0.5	1	0.5	0.5	0	3	1	2	1	0	1	0.5	0.5	0	20.5	0.761021
	1	Potenciar o Porto de Aveiro enquanto polo dinamizador da economia local e regional e gerador de emprego qualificado	6	1	4	2	0	0	0	0	0	2	0	0	1	0	2	0	1	0	0.428571
		Impacto	2	1	2	2						1			1		2		1
		Intensidade	3	1	2	1						2			1		1		1
	2	Enquadrar a área do Porto de Aveiro e sua envolvente	2	0	1	2	1	2	1	1	0	4	2	4	1	0	0	1	0	0	1.21429
		Impacto	1		1	2	1	2	1	1		2	2	2	1			1
		Intensidade	2		1	1	1	1	1	1		2	1	2	1			1
			23.625	10.5625	20.5625	15	6.375	11.4375	11	9.125	10.6875	27.375	8.8125	14.8125	19.125	10.3125	9.3125	24.8125	19.1875	17.25	26.9375	1	0.445094
		valor dos impactos se os critérios do nivel 1 tivessem o mesmo peso																							soma dos impactos se os critérios do nível 1 tivessem o mesmo impacto. Esta operaçao foi para converter a matriz de impactos a ser usada com apenas o nivel 0
		Regeneração Urbana	1.391	0.0993572	0.894215	0.794858	0.198714	0.695501	0.794858	0.993572	1.88779	2.58329	3.27879	4.47107	0.993572	1.68907	0.496786	2.88136	1.88779	1.19229	1.51244				3.17943	2.68264	12.2209	3.17943	5.96143
		Cultura e Criatividade	1.8208	0.455201	1.8208	0.455201		0.455201	0.455201			4.55201	0.455201	0.682801	1.5932	0.682801	0.682801	2.276	5.00721	4.0968	1.41618				4.55201	0.910401	5.69001	2.9588	11.38
		Ílhavo Inteligente	1.84079		1.84079	0.613598		0.613598	0.613598	0.306799	2.45439	1.2272		0.306799	3.06799	3.06799	1.2272	3.06799	3.06799	1.84079	1.39764				4.29519	1.53399	3.98839	7.36318	7.97677
		Ílhavo Inclusivo	1.16426	0.776175	0.582131	0.582131	0.776175		0.194044	0.582131	1.94044	0.776175	1.94044	1.55235	3.49279	3.49279	0.970219	3.49279	1.94044	1.16426	1.41221				3.1047	1.55235	6.2094	7.9558	6.59749
		Parque Central de Ílhavo			0.493546	0.246773	0.246773	1.48064	2.22096	1.23387	0.987092	3.20805	0.246773	2.46773	3.20805	1.48064	0.740319	4.44192	0.987092	2.22096	1.43951				0.740319	5.18224	6.90965	5.42901	7.64997
		Mar e Ria	2.26089		1.13045	0.376815	2.26089	2.26089	2.26089	2.26089	0.753631	4.52178		1.13045	1.13045			3.01452	1.13045	3.01452	1.5282				3.76815	9.04357	6.40586	1.13045	7.15949
		Turismo de Futuro	0.990682	1.32091	1.98136	1.98136	0.330227	2.97205	2.31159	0.990682	0.990682	2.97205	1.32091	1.98136	0.660455			2.97205	2.97205	0.990682	1.54106				6.27432	6.60455	7.265	0.660455	6.93477
		Valorização de Capital Humano	5.13065	5.13065	4.10452	3.07839	1.02613			1.02613	0.513065	0.513065	0.513065		2.56532		3.33492			1.02613	1.55345				17.4442	2.05226	1.53919	5.90025	1.02613
		Economia + Competitiva	6.74154	2.37937	6.74154	6.34498				0.396561	1.58624	2.37937			0.793122		1.58624			0.396561	1.63031				22.2074	0.396561	3.96561	2.37937	0.396561
		Ílhavo e o Porto de Aveiro	5.63178	0.703973	3.51986	2.81589	0.703973	1.40795	0.703973	0.703973		4.22384	1.40795	2.81589	1.40795		1.40795	0.703973	0.703973		1.60349				12.6715	3.51986	8.44767	2.81589	1.40795
		Matriz para calcular apenas com nível 0						se os critérios do nivel 0 valerem todos o mesmo -->	0.2	0.2	0.2	0.2	0.2
		Nível 0	0.2	0.2	0.2	0.2	0.2																		projeto * nivel1
																							Media se todos criterios valessem o mesmo (considera o nivel 0)		Racio de redestribuição					resultados exercicio
		Regeneração Urbana	0.635886	0.536529	2.44419	0.635886	1.19229															5.44478	5.44478		0.994056						0.2112	0.1964	0.1745	0.2067	0.2112
		Cultura e Criatividade	0.910401	0.18208	1.138	0.591761	2.276															5.09825	5.09825		1.06162						0.284	0.2172	0.2222	0.2766
		Ílhavo Inteligente	0.859037	0.306799	0.797677	1.47264	1.59535															5.0315	5.0315		1.0757						0.2678	0.238	0.2253	0.2689
		Ílhavo Inclusivo	0.62094	0.31047	1.24188	1.59116	1.3195															5.08395	5.08395		1.06461						0.3113	0.2313	0.2354	0.2221
		Parque Central de Ílhavo	0.148064	1.03645	1.38193	1.0858	1.52999															5.18224	5.18224		1.04442						0.3937	0.3054	0.3009
		Mar e Ria	0.753631	1.80871	1.28117	0.226089	1.4319															5.5015	5.5015		0.983806						0.2983	0.3311	0.3706
		Turismo de Futuro	1.25486	1.32091	1.453	0.132091	1.38695															5.54782	5.54782		0.975593
		Valorização de Capital Humano	3.48884	0.410452	0.307839	1.18005	0.205226															5.59241	5.59241		0.967814
		Economia + Competitiva	4.44148	0.0793122	0.793122	0.475873	0.0793122															5.8691	5.8691		0.922187
		Ílhavo e o Porto de Aveiro	2.5343	0.703973	1.68953	0.563178	0.281589															5.77258	5.77258		0.937608
																						5.41241	5.41241		1.00274
		esta é que é a matriz usada nos diversos MCDM!
		Regeneração Urbana	0.632107	0.53334	2.42966	0.632107	1.1852															5.41241	1.08248
		Cultura e Criatividade	0.966502	0.1933	1.20813	0.628226	2.41626															5.41241	1.08248
		Ílhavo Inteligente	0.92407	0.330025	0.858065	1.58412	1.71613															5.41241	1.08248
		Ílhavo Inclusivo	0.661058	0.330529	1.32212	1.69396	1.40475															5.41241	1.08248
		Parque Central de Ílhavo	0.15464	1.08248	1.44331	1.13403	1.59795															5.41241	1.08248
		Mar e Ria	0.741426	1.77942	1.26042	0.222428	1.40871															5.41241	1.08248
		Turismo de Futuro	1.22424	1.28867	1.41754	0.128867	1.3531															5.41241	1.08248
		Valorização de Capital Humano	3.37655	0.397241	0.297931	1.14207	0.198621															5.41241	1.08248
		Economia + Competitiva	4.09588	0.0731407	0.731407	0.438844	0.0731407															5.41241	1.08248
		Ílhavo e o Porto de Aveiro	2.37618	0.66005	1.58412	0.52804	0.26402															5.41241	1.08248
																								Order	Rank
		Regeneração Urbana	0.126421	0.106668	0.485932	0.126421	0.23704														1.08248			100	6
		Cultura e Criatividade	0.1933	0.0386601	0.241626	0.125645	0.483251														1.08248			100	1
		Ílhavo Inteligente	0.184814	0.066005	0.171613	0.316824	0.343226														1.08248			100	1
		Ílhavo Inclusivo	0.132212	0.0661058	0.264423	0.338792	0.28095														1.08248			100	6
		Parque Central de Ílhavo	0.0309281	0.216496	0.288662	0.226806	0.31959														1.08248			100	1
		Mar e Ria	0.148285	0.355885	0.252085	0.0444856	0.281742														1.08248			100	6
		Turismo de Futuro	0.244847	0.257734	0.283507	0.0257734	0.270621														1.08248			100	6
		Valorização de Capital Humano	0.67531	0.0794482	0.0595862	0.228414	0.0397241														1.08248			100	1
		Economia + Competitiva	0.819176	0.0146281	0.146281	0.0877688	0.0146281														1.08248			100	1
		Ílhavo e o Porto de Aveiro	0.475236	0.13201	0.316824	0.105608	0.052804														1.08248			100	6
																					1.08248
		teste com potencia (em vez de multiplicar o impacto do projeto com o peso do criterio)
		Regeneração Urbana	0.912343	0.881862	1.19429	0.912343	1.03457														4.9354			99.3887	3
		Cultura e Criatividade	0.993209	0.719858	1.03854	0.91122	1.19297														4.85579			97.7855	7
		Ílhavo Inteligente	0.984331	0.801142	0.969849	1.09637	1.11406														4.96576			100	1
		Ílhavo Inclusivo	0.920551	0.801386	1.05744	1.11117	1.07033														4.96088			99.9018	2
		Parque Central de Ílhavo	0.688438	1.01598	1.07615	1.02547	1.09828														4.90432			98.7627	5
		Mar e Ria	0.941919	1.12216	1.04738	0.740351	1.07094														4.92275			99.1339	4
		Turismo de Futuro	1.04129	1.05203	1.07228	0.663786	1.06235														4.89173			98.5093	6
		Valorização de Capital Humano	1.27554	0.831402	0.784916	1.02692	0.723777														4.64256			93.4915	9
		Economia + Competitiva	1.32577	0.592696	0.939359	0.848129	0.592696														4.29865			86.5659	10
		Ílhavo e o Porto de Aveiro	1.18898	0.92027	1.09637	0.880103	0.766174														4.8519			97.7072	8
																					4.82297
									Economia	Patrimonio natural	Territorio	Inclusao	Qualidade
			0.2112	0.1964	0.1745	0.2067	0.2112		100	92.9924	82.6231	97.8693	100
			0.284	0.2172	0.2222	0.2766			100	76.4789	78.2394	97.3944
			0.2678	0.238	0.2253	0.2689			99.5909	88.5087	83.7858	100
			0.3113	0.2313	0.2354	0.2221			100	74.3013	75.6184	71.346
			0.3937	0.3054	0.3009				100	77.5718	76.4288
			0.2983	0.3311	0.3706				80.4911	89.3416	100
			0.2	0.2	0.2	0.2	0.2
			0.25	0.25	0.25	0.25
			0.25	0.25	0.25	0.25
			0.25	0.25	0.25	0.25
			0.33	0.33	0.33
			0.33	0.33	0.33
			0.3	0.25	0.2	0.1	0.15
			0.3	0.15	0.4	0.15
			0.15	0.4	0.3	0.15
			0.25	0.3	0.2	0.25
			0.3	0.3	0.4
			0.4	0.4	0.2
			quando são os pesos todos iguais
			0.25	0.25	0.25	0.25	0.25	0.25	0.25	0.25	0.25	0.25	0.25	0.25	0.333333	0.333333	0.333333	0.333333	0.333333	0.333333
			0.2112				0.1964				0.1745				0.2067			0.2112
			0.284	0.2172	0.2222	0.2766	0.2678	0.238	0.2253	0.2689	0.3113	0.2313	0.2354	0.2221	0.3937	0.3054	0.3009	0.2983	0.3311	0.3706

## Sheet: SAW_nivel_0_máximo
	Economia	Património natural	Território, centralidade e marca	Inclusão social	+ Qualidade de vida
cópia da tabela anterior - ilhavo harmonizaçao (média dos scores iniciais)
Regeneração Urbana	0.632107	0.53334	2.42966	0.632107	1.1852
Cultura e Criatividade	0.966502	0.1933	1.20813	0.628226	2.41626
Ílhavo Inteligente	0.92407	0.330025	0.858065	1.58412	1.71613
Ílhavo Inclusivo	0.661058	0.330529	1.32212	1.69396	1.40475
Parque Central de Ílhavo	0.15464	1.08248	1.44331	1.13403	1.59795
Mar e Ria	0.741426	1.77942	1.26042	0.222428	1.40871
Turismo de Futuro	1.22424	1.28867	1.41754	0.128867	1.3531
Valorização de Capital Humano	3.37655	0.397241	0.297931	1.14207	0.198621																					5
Economia + Competitiva	4.09588	0.0731407	0.731407	0.438844	0.0731407
Ílhavo e o Porto de Aveiro	2.37618	0.66005	1.58412	0.52804	0.26402
																										0.25	0.25	0.25	0.25	0.25	0.25
																										0.2112				0.1964
conversao da matriz de impacto numa escala de 1 a 5	Economia	Património natural	Território, centralidade e marca	Inclusão social	+ Qualidade de vida																					Economia	Património natural	Território, centralidade e marca	Inclusão social	+ Qualidade de vida
Regeneração Urbana	1.55581	1.4576	3.3432	1.55581	2.10577															sistema de equação [a(min)+b=1 ///// a(max)+b=5]					pesos	0.2112	0.1964	0.1745	0.2067	0.2112
Cultura e Criatividade	1.88831	1.11948	2.12857	1.55195	3.32987															para transformar os pesos numa escala de 1 a 5						5	3	1	5	5
Ílhavo Inteligente	1.84612	1.25543	1.78049	2.50244	2.6337																				conversao sem arredondar	5	3.38692	1	4.50954	5
Ílhavo Inclusivo	1.58459	1.25593	2.24192	2.61166	2.32408
Parque Central de Ílhavo	1.08104	2.00364	2.36242	2.05489	2.51619																	min	0.0731407				min	0.1745
Mar e Ria	1.66451	2.69664	2.18057	1.14844	2.32802															0.927273		máx	4.09588				máx	0.2112
Turismo de Futuro	2.14459	2.20866	2.3368	1.05541	2.27273																						b	-18.0191
Valorização de Capital Humano	4.28474	1.32227	1.22352	2.06289	1.12477															0.994347							a	108.992							http://www.calculadoraonline.com.br/sistemas-lineares
Economia + Competitiva	5	1	1.65455	1.36364	1
Ílhavo e o Porto de Aveiro	3.29002	1.58359	2.50244	1.45233	1.1898
																				assumindo os mesmos pesos do exercício tambem convertidos numa escala de 1-5
SAW method - todos os critérios são considerados beneficio (relacao com o máximo)	P1,1	P1,2	P1,3	P1,4	P1,5																	ordenaçao
	0.311161	0.540524	1	0.595716	0.632389														1	Regeneração Urbana	10.3179	82.4053	10
SAW weight	1.55581	1.62157	1	2.97858	3.16194														2	Cultura e Criatividade	11.7416	93.776	4
	P2,1	P2,2	P2,3	P2,4	P2,5														3	Ílhavo Inteligente	12.5209	100	1
	0.377662	0.415139	0.636687	0.594238	1														4	Ílhavo Inclusivo	12.1422	96.9749	2
SAW weight	1.88831	1.24542	0.636687	2.97119	5														5	Parque Central de Ílhavo	11.729	93.6752	5
	P3,1	P3,2	P3,3	P3,4	P3,5														6	Mar e Ria	11.0111	87.9416	6
	0.369224	0.465555	0.53257	0.95818	0.790933														7	Turismo de Futuro	10.7339	85.7277	7
SAW weight	1.84612	1.39666	0.53257	4.7909	3.95466														8	Valorização de Capital Humano	11.76	93.923	3
	P4,1	P4,2	P4,3	P4,4	P4,5														9	Economia + Competitiva	10.7196	85.6138	8
	0.316919	0.465741	0.67059	1	0.697949														10	Ílhavo e o Porto de Aveiro	10.3673	82.7999	9
SAW weight	1.58459	1.39722	0.67059	5	3.48975
	P5,1	P5,2	P5,3	P5,4	P5,5																média	90.2837
	0.216208	0.743013	0.706636	0.786815	0.755642																desvio padrao	0.732499
SAW weight	1.08104	2.22904	0.706636	3.93407	3.77821																variancia	0.536555
	P6,1	P6,2	P6,3	P6,4	P6,5
	0.332902	1	0.652242	0.439737	0.699132
SAW weight	1.66451	3	0.652242	2.19869	3.49566
	P7,1	P7,2	P7,3	P7,4	P7,5
	0.428918	0.819041	0.69897	0.404115	0.682527
SAW weight	2.14459	2.45712	0.69897	2.02058	3.41264
	P8,1	P8,2	P8,3	P8,4	P8,5
	0.856947	0.49034	0.365973	0.789876	0.337782
SAW weight	4.28474	1.47102	0.365973	3.94938	1.68891
	P9,1	P9,2	P9,3	P9,4	P9,5
	1	0.370832	0.494899	0.522134	0.300312
SAW weight	5	1.1125	0.494899	2.61067	1.50156
	P10,1	P10,2	P10,3	P10,4	P10,5
	0.658004	0.587247	0.748516	0.556094	0.357311
SAW weight	3.29002	1.76174	0.748516	2.78047	1.78656

## Sheet: SAW_nivel_0_máximo (neutral)
	Economia	Património natural	Território, centralidade e marca	Inclusão social	+ Qualidade de vida
cópia da tabela anterior - ilhavo harmonizaçao (média dos scores iniciais)
Regeneração Urbana	0.632107	0.53334	2.42966	0.632107	1.1852
Cultura e Criatividade	0.966502	0.1933	1.20813	0.628226	2.41626
Ílhavo Inteligente	0.92407	0.330025	0.858065	1.58412	1.71613
Ílhavo Inclusivo	0.661058	0.330529	1.32212	1.69396	1.40475
Parque Central de Ílhavo	0.15464	1.08248	1.44331	1.13403	1.59795
Mar e Ria	0.741426	1.77942	1.26042	0.222428	1.40871
Turismo de Futuro	1.22424	1.28867	1.41754	0.128867	1.3531
Valorização de Capital Humano	3.37655	0.397241	0.297931	1.14207	0.198621																					5
Economia + Competitiva	4.09588	0.0731407	0.731407	0.438844	0.0731407
Ílhavo e o Porto de Aveiro	2.37618	0.66005	1.58412	0.52804	0.26402
																										0.25	0.25	0.25	0.25	0.25	0.25
																										0.2112				0.1964
conversao da matriz de impacto numa escala de 1 a 5	Economia	Património natural	Território, centralidade e marca	Inclusão social	+ Qualidade de vida																					Economia	Património natural	Território, centralidade e marca	Inclusão social	+ Qualidade de vida
Regeneração Urbana	1.55581	1.4576	3.3432	1.55581	2.10577															sistema de equação [a(min)+b=1 ///// a(max)+b=5]					pesos	0.2	0.2	0.2	0.1999	0.2
Cultura e Criatividade	1.88831	1.11948	2.12857	1.55195	3.32987															para transformar os pesos numa escala de 1 a 5						5	5	5	1	5
Ílhavo Inteligente	1.84612	1.25543	1.78049	2.50244	2.6337																				conversao sem arredondar	5	5	5	1	5
Ílhavo Inclusivo	1.58459	1.25593	2.24192	2.61166	2.32408
Parque Central de Ílhavo	1.08104	2.00364	2.36242	2.05489	2.51619																	min	0.0731407				min	0.1999
Mar e Ria	1.66451	2.69664	2.18057	1.14844	2.32802															0.927273		máx	4.09588				máx	0.2
Turismo de Futuro	2.14459	2.20866	2.3368	1.05541	2.27273																						b	-7995
Valorização de Capital Humano	4.28474	1.32227	1.22352	2.06289	1.12477															0.994347							a	40000							http://www.calculadoraonline.com.br/sistemas-lineares
Economia + Competitiva	5	1	1.65455	1.36364	1
Ílhavo e o Porto de Aveiro	3.29002	1.58359	2.50244	1.45233	1.1898
																				assumindo os mesmos pesos do exercício tambem convertidos numa escala de 1-5
SAW method - todos os critérios são considerados beneficio (relacao com o máximo)	P1,1	P1,2	P1,3	P1,4	P1,5																	ordenaçao
	0.311161	0.540524	1	0.595716	0.632389														1	Regeneração Urbana	13.0161	93.9036	3
SAW weight	1.55581	2.70262	5	0.595716	3.16194														2	Cultura e Criatividade	12.7417	91.9239	5
	P2,1	P2,2	P2,3	P2,4	P2,5														3	Ílhavo Inteligente	11.7496	84.7665	8
	0.377662	0.415139	0.636687	0.594238	1														4	Ílhavo Inclusivo	11.756	84.8128	7
SAW weight	1.88831	2.0757	3.18344	0.594238	5														5	Parque Central de Ílhavo	12.8943	93.0251	4
	P3,1	P3,2	P3,3	P3,4	P3,5														6	Mar e Ria	13.8611	100	1
	0.369224	0.465555	0.53257	0.95818	0.790933														7	Turismo de Futuro	13.5514	97.7656	2
SAW weight	1.84612	2.32777	2.66285	0.95818	3.95466														8	Valorização de Capital Humano	11.0451	79.684	10
	P4,1	P4,2	P4,3	P4,4	P4,5														9	Economia + Competitiva	11.3524	81.9007	9
	0.316919	0.465741	0.67059	1	0.697949														10	Ílhavo e o Porto de Aveiro	12.3115	88.8203	6
SAW weight	1.58459	2.3287	3.35295	1	3.48975
	P5,1	P5,2	P5,3	P5,4	P5,5																média	89.6602
	0.216208	0.743013	0.706636	0.786815	0.755642																desvio padrao	0.892884
SAW weight	1.08104	3.71506	3.53318	0.786815	3.77821																variancia	0.797242
	P6,1	P6,2	P6,3	P6,4	P6,5
	0.332902	1	0.652242	0.439737	0.699132
SAW weight	1.66451	5	3.26121	0.439737	3.49566
	P7,1	P7,2	P7,3	P7,4	P7,5
	0.428918	0.819041	0.69897	0.404115	0.682527
SAW weight	2.14459	4.09521	3.49485	0.404115	3.41264
	P8,1	P8,2	P8,3	P8,4	P8,5
	0.856947	0.49034	0.365973	0.789876	0.337782
SAW weight	4.28474	2.4517	1.82986	0.789876	1.68891
	P9,1	P9,2	P9,3	P9,4	P9,5
	1	0.370832	0.494899	0.522134	0.300312
SAW weight	5	1.85416	2.47449	0.522134	1.50156
	P10,1	P10,2	P10,3	P10,4	P10,5
	0.658004	0.587247	0.748516	0.556094	0.357311
SAW weight	3.29002	2.93623	3.74258	0.556094	1.78656

## Sheet: WPM_nivel_0 (maximo)
	Economia	Património natural	Território, centralidade e marca	Inclusão social	+ Qualidade de vida
cópia da tabela anterior - ilhavo harmonizaçao (média dos scores iniciais)
Regeneração Urbana	0.632107	0.53334	2.42966	0.632107	1.1852
Cultura e Criatividade	0.966502	0.1933	1.20813	0.628226	2.41626
Ílhavo Inteligente	0.92407	0.330025	0.858065	1.58412	1.71613
Ílhavo Inclusivo	0.661058	0.330529	1.32212	1.69396	1.40475
Parque Central de Ílhavo	0.15464	1.08248	1.44331	1.13403	1.59795
Mar e Ria	0.741426	1.77942	1.26042	0.222428	1.40871
Turismo de Futuro	1.22424	1.28867	1.41754	0.128867	1.3531
Valorização de Capital Humano	3.37655	0.397241	0.297931	1.14207	0.198621																					5
Economia + Competitiva	4.09588	0.0731407	0.731407	0.438844	0.0731407
Ílhavo e o Porto de Aveiro	2.37618	0.66005	1.58412	0.52804	0.26402
																										0.25	0.25	0.25	0.25	0.25	0.25
																										0.2112				0.1964
Caso: média scores originais, caso os critérios tivessem todos o mesmo peso	Economia	Património natural	Território, centralidade e marca	Inclusão social	+ Qualidade de vida																					Economia	Património natural	Território, centralidade e marca	Inclusão social	+ Qualidade de vida
Regeneração Urbana	1.55581	1.4576	3.3432	1.55581	2.10577															sistema de equação [a(min)+b=1 ///// a(max)+b=5]					pesos	0.2112	0.1964	0.1745	0.2067	0.2112
Cultura e Criatividade	1.88831	1.11948	2.12857	1.55195	3.32987															para transformar os pesos numa escala de 1 a 5						5	3	1	5	5
Ílhavo Inteligente	1.84612	1.25543	1.78049	2.50244	2.6337																				conversao sem arredondar	5	3.38692	1	4.50954	5
Ílhavo Inclusivo	1.58459	1.25593	2.24192	2.61166	2.32408
Parque Central de Ílhavo	1.08104	2.00364	2.36242	2.05489	2.51619																	min	0.0731407				min	0.1745
Mar e Ria	1.66451	2.69664	2.18057	1.14844	2.32802															0.927273		máx	4.09588				máx	0.2112
Turismo de Futuro	2.14459	2.20866	2.3368	1.05541	2.27273																						b	-18.0191
Valorização de Capital Humano	4.28474	1.32227	1.22352	2.06289	1.12477															0.994347							a	108.992							http://www.calculadoraonline.com.br/sistemas-lineares
Economia + Competitiva	5	1	1.65455	1.36364	1
Ílhavo e o Porto de Aveiro	3.29002	1.58359	2.50244	1.45233	1.1898
																				Weighted product method
based on SAW method	P1,1	P1,2	P1,3	P1,4	P1,5
	0.311161	0.540524	1	0.595716	0.632389														1	Regeneração Urbana	3.49534e-06	3.79157	9
WPM weight	0.00291694	0.157923	1	0.0750232	0.10114														2	Cultura e Criatividade	2.59317e-05	28.1293	4
	P2,1	P2,2	P2,3	P2,4	P2,5														3	Ílhavo Inteligente	9.21873e-05	100	1
	0.377662	0.415139	0.636687	0.594238	1														4	Ílhavo Inclusivo	3.58714e-05	38.9114	2
WPM weight	0.00768278	0.0715454	0.636687	0.0740976	1														5	Parque Central de Ílhavo	1.01738e-05	11.0361	5
	P3,1	P3,2	P3,3	P3,4	P3,5														6	Mar e Ria	7.32404e-06	7.94474	7
	0.369224	0.465555	0.53257	0.95818	0.790933														7	Turismo de Futuro	8.89966e-06	9.65388	6
WPM weight	0.00686198	0.100905	0.53257	0.807673	0.309526														8	Valorização de Capital Humano	2.6958e-05	29.2427	3
	P4,1	P4,2	P4,3	P4,4	P4,5														9	Economia + Competitiva	2.39234e-06	2.59509	10
	0.316919	0.465741	0.67059	1	0.697949														10	Ílhavo e o Porto de Aveiro	5.7914e-06	6.28221	8
WPM weight	0.00319698	0.101026	0.67059	1	0.165623
	P5,1	P5,2	P5,3	P5,4	P5,5
	0.216208	0.743013	0.706636	0.786815	0.755642
WPM weight	0.000472451	0.410194	0.706636	0.301552	0.246366
	P6,1	P6,2	P6,3	P6,4	P6,5
	0.332902	1	0.652242	0.439737	0.699132
WPM weight	0.00408865	1	0.652242	0.0164424	0.167031
	P7,1	P7,2	P7,3	P7,4	P7,5
	0.428918	0.819041	0.69897	0.404115	0.682527
WPM weight	0.0145168	0.549437	0.69897	0.0107777	0.148115
	P8,1	P8,2	P8,3	P8,4	P8,5
	0.856947	0.49034	0.365973	0.789876	0.337782
WPM weight	0.462137	0.117894	0.365973	0.307464	0.00439727
	P9,1	P9,2	P9,3	P9,4	P9,5
	1	0.370832	0.494899	0.522134	0.300312
WPM weight	1	0.0509955	0.494899	0.0388071	0.00244266
	P10,1	P10,2	P10,3	P10,4	P10,5
	0.658004	0.587247	0.748516	0.556094	0.357311
WPM weight	0.123351	0.202517	0.748516	0.0531792	0.00582417

## Sheet: WPM_nivel_0 (maximo) (neutral)
	Economia	Património natural	Território, centralidade e marca	Inclusão social	+ Qualidade de vida
cópia da tabela anterior - ilhavo harmonizaçao (média dos scores iniciais)
Regeneração Urbana	0.632107	0.53334	2.42966	0.632107	1.1852
Cultura e Criatividade	0.966502	0.1933	1.20813	0.628226	2.41626
Ílhavo Inteligente	0.92407	0.330025	0.858065	1.58412	1.71613
Ílhavo Inclusivo	0.661058	0.330529	1.32212	1.69396	1.40475
Parque Central de Ílhavo	0.15464	1.08248	1.44331	1.13403	1.59795
Mar e Ria	0.741426	1.77942	1.26042	0.222428	1.40871
Turismo de Futuro	1.22424	1.28867	1.41754	0.128867	1.3531
Valorização de Capital Humano	3.37655	0.397241	0.297931	1.14207	0.198621																					5
Economia + Competitiva	4.09588	0.0731407	0.731407	0.438844	0.0731407
Ílhavo e o Porto de Aveiro	2.37618	0.66005	1.58412	0.52804	0.26402
																										0.25	0.25	0.25	0.25	0.25	0.25
																										0.2112				0.1964
Caso: média scores originais, caso os critérios tivessem todos o mesmo peso	Economia	Património natural	Território, centralidade e marca	Inclusão social	+ Qualidade de vida																					Economia	Património natural	Território, centralidade e marca	Inclusão social	+ Qualidade de vida
Regeneração Urbana	1.55581	1.4576	3.3432	1.55581	2.10577															sistema de equação [a(min)+b=1 ///// a(max)+b=5]					pesos	0.2	0.2	0.2	0.19999	0.2
Cultura e Criatividade	1.88831	1.11948	2.12857	1.55195	3.32987															para transformar os pesos numa escala de 1 a 5						5	5	5	1	5
Ílhavo Inteligente	1.84612	1.25543	1.78049	2.50244	2.6337																				conversao sem arredondar	5	5	5	1	5
Ílhavo Inclusivo	1.58459	1.25593	2.24192	2.61166	2.32408
Parque Central de Ílhavo	1.08104	2.00364	2.36242	2.05489	2.51619																	min	0.0731407				min	0.19999
Mar e Ria	1.66451	2.69664	2.18057	1.14844	2.32802															0.927273		máx	4.09588				máx	0.2
Turismo de Futuro	2.14459	2.20866	2.3368	1.05541	2.27273																						b	-79995
Valorização de Capital Humano	4.28474	1.32227	1.22352	2.06289	1.12477															0.994347							a	400000							http://www.calculadoraonline.com.br/sistemas-lineares
Economia + Competitiva	5	1	1.65455	1.36364	1
Ílhavo e o Porto de Aveiro	3.29002	1.58359	2.50244	1.45233	1.1898
																				Weighted product method
based on SAW method	P1,1	P1,2	P1,3	P1,4	P1,5
	0.311161	0.540524	1	0.595716	0.632389														1	Regeneração Urbana	8.10893e-06	15.1763	3
WPM weight	0.00291694	0.0461398	1	0.595716	0.10114														2	Cultura e Criatividade	5.88951e-06	11.0225	5
	P2,1	P2,2	P2,3	P2,4	P2,5														3	Ílhavo Inteligente	1.90692e-06	3.56889	7
	0.377662	0.415139	0.636687	0.594238	1														4	Ílhavo Inclusivo	1.57349e-06	2.94487	8
WPM weight	0.00768278	0.0123302	0.104624	0.594238	1														5	Parque Central de Ílhavo	3.65402e-06	6.83867	6
	P3,1	P3,2	P3,3	P3,4	P3,5														6	Mar e Ria	3.54496e-05	66.3458	2
	0.369224	0.465555	0.53257	0.95818	0.790933														7	Turismo de Futuro	5.34317e-05	100	1
WPM weight	0.00686198	0.0218702	0.0428434	0.95818	0.309526														8	Valorização de Capital Humano	2.98705e-07	0.559041	9
	P4,1	P4,2	P4,3	P4,4	P4,5														9	Economia + Competitiva	2.65531e-07	0.496955	10
	0.316919	0.465741	0.67059	1	0.697949														10	Ílhavo e o Porto de Aveiro	6.55597e-06	12.2698	4
WPM weight	0.00319698	0.0219139	0.135608	1	0.165623
	P5,1	P5,2	P5,3	P5,4	P5,5
	0.216208	0.743013	0.706636	0.786815	0.755642
WPM weight	0.000472451	0.226455	0.176189	0.786815	0.246366
	P6,1	P6,2	P6,3	P6,4	P6,5
	0.332902	1	0.652242	0.439737	0.699132
WPM weight	0.00408865	1	0.118044	0.439737	0.167031
	P7,1	P7,2	P7,3	P7,4	P7,5
	0.428918	0.819041	0.69897	0.404115	0.682527
WPM weight	0.0145168	0.368578	0.166838	0.404115	0.148115
	P8,1	P8,2	P8,3	P8,4	P8,5
	0.856947	0.49034	0.365973	0.789876	0.337782
WPM weight	0.462137	0.0283456	0.00656514	0.789876	0.00439727
	P9,1	P9,2	P9,3	P9,4	P9,5
	1	0.370832	0.494899	0.522134	0.300312
WPM weight	1	0.00701273	0.0296881	0.522134	0.00244266
	P10,1	P10,2	P10,3	P10,4	P10,5
	0.658004	0.587247	0.748516	0.556094	0.357311
WPM weight	0.123351	0.0698399	0.234967	0.556094	0.00582417

## Sheet: TOPSIS_Nivel_0
			Economia	Património natural	Território, centralidade e marca	Inclusão social	+ Qualidade de vida
		cópia da tabela anterior
		Regeneração Urbana	0.632107	0.53334	2.42966	0.632107	1.1852
		Cultura e Criatividade	0.966502	0.1933	1.20813	0.628226	2.41626
		Ílhavo Inteligente	0.92407	0.330025	0.858065	1.58412	1.71613
		Ílhavo Inclusivo	0.661058	0.330529	1.32212	1.69396	1.40475
		Parque Central de Ílhavo	0.15464	1.08248	1.44331	1.13403	1.59795
		Mar e Ria	0.741426	1.77942	1.26042	0.222428	1.40871
		Turismo de Futuro	1.22424	1.28867	1.41754	0.128867	1.3531
		Valorização de Capital Humano	3.37655	0.397241	0.297931	1.14207	0.198621
		Economia + Competitiva	4.09588	0.0731407	0.731407	0.438844	0.0731407
		Ílhavo e o Porto de Aveiro	2.37618	0.66005	1.58412	0.52804	0.26402
		normalizar de acordo com TOPSIS
		Regeneração Urbana	0.101846	0.199631	0.562435	0.207265	0.274482
		Cultura e Criatividade	0.155724	0.0723531	0.279666	0.205992	0.559584
		Ílhavo Inteligente	0.148888	0.12353	0.198631	0.519426	0.397441
		Ílhavo Inclusivo	0.106511	0.123718	0.306053	0.555442	0.325327
		Parque Central de Ílhavo	0.0249159	0.405177	0.334108	0.371843	0.370071
		Mar e Ria	0.11946	0.666045	0.291772	0.072933	0.326245
		Turismo de Futuro	0.197251	0.482354	0.328142	0.0422549	0.313367
		Valorização de Capital Humano	0.544035	0.148689	0.0689672	0.374479	0.0459988
		Economia + Competitiva	0.659935	0.0273769	0.169311	0.143895	0.0169387
		Ílhavo e o Porto de Aveiro	0.382854	0.247059	0.366704	0.173142	0.0611447
																					Si+	Si-	Pi	Rank			Economia	Património natural	Território, centralidade e marca	Inclusão social	+ Qualidade de vida
		Regeneração Urbana	0.0215099	0.0392076	0.098145	0.0428416	0.0579706														0.163016	0.132137	0.44769	6	49.8184	pesos	0.2112	0.1964	0.1745	0.2067	0.2112
		Cultura e Criatividade	0.032889	0.0142102	0.0488018	0.0425786	0.118184														0.164469	0.148362	0.474256	4	52.7746
		Ílhavo Inteligente	0.0314451	0.0242612	0.0346611	0.107365	0.0839395														0.169423	0.131517	0.43702	7	48.6311
		Ílhavo Inclusivo	0.0224951	0.0242983	0.0534063	0.11481	0.0687091														0.176707	0.126852	0.417881	8	46.5013
		Parque Central de Ílhavo	0.00526224	0.0795769	0.0583018	0.0768599	0.0781591														0.189306	0.0851741	0.31031	10	34.531
		Mar e Ria	0.0252299	0.130811	0.0509143	0.0150753	0.0689029														0.185965	0.122495	0.397119	9	44.1909
		Turismo de Futuro	0.0416594	0.0947343	0.0572607	0.00873408	0.0661831														0.153292	0.135107	0.468472	5	52.131
		Valorização de Capital Humano	0.1149	0.0292025	0.0120348	0.0774048	0.00971495														0.0769426	0.207182	0.729194	2	81.1439
		Economia + Competitiva	0.139378	0.00537681	0.0295448	0.0297431	0.00357746														0.0273492	0.242483	0.898643	1	100
		Ílhavo e o Porto de Aveiro	0.0808588	0.0485225	0.0639898	0.0357884	0.0129138														0.0938323	0.176009	0.652268	3	72.5836
		calculate ideal worst	0.00526224	0.130811	0.098145	0.11481	0.118184
		calculate ideal best	0.139378	0.00537681	0.0120348	0.00873408	0.00357746

## Sheet: TOPSIS_Nivel_0 (neutral)
			Economia	Património natural	Território, centralidade e marca	Inclusão social	+ Qualidade de vida
		cópia da tabela anterior
		Regeneração Urbana	0.632107	0.53334	2.42966	0.632107	1.1852
		Cultura e Criatividade	0.966502	0.1933	1.20813	0.628226	2.41626
		Ílhavo Inteligente	0.92407	0.330025	0.858065	1.58412	1.71613
		Ílhavo Inclusivo	0.661058	0.330529	1.32212	1.69396	1.40475
		Parque Central de Ílhavo	0.15464	1.08248	1.44331	1.13403	1.59795
		Mar e Ria	0.741426	1.77942	1.26042	0.222428	1.40871
		Turismo de Futuro	1.22424	1.28867	1.41754	0.128867	1.3531
		Valorização de Capital Humano	3.37655	0.397241	0.297931	1.14207	0.198621
		Economia + Competitiva	4.09588	0.0731407	0.731407	0.438844	0.0731407
		Ílhavo e o Porto de Aveiro	2.37618	0.66005	1.58412	0.52804	0.26402
		normalizar de acordo com TOPSIS
		Regeneração Urbana	0.101846	0.199631	0.562435	0.207265	0.274482
		Cultura e Criatividade	0.155724	0.0723531	0.279666	0.205992	0.559584
		Ílhavo Inteligente	0.148888	0.12353	0.198631	0.519426	0.397441
		Ílhavo Inclusivo	0.106511	0.123718	0.306053	0.555442	0.325327
		Parque Central de Ílhavo	0.0249159	0.405177	0.334108	0.371843	0.370071
		Mar e Ria	0.11946	0.666045	0.291772	0.072933	0.326245
		Turismo de Futuro	0.197251	0.482354	0.328142	0.0422549	0.313367
		Valorização de Capital Humano	0.544035	0.148689	0.0689672	0.374479	0.0459988
		Economia + Competitiva	0.659935	0.0273769	0.169311	0.143895	0.0169387
		Ílhavo e o Porto de Aveiro	0.382854	0.247059	0.366704	0.173142	0.0611447
																					Si+	Si-	Pi	Rank			Economia	Património natural	Território, centralidade e marca	Inclusão social	+ Qualidade de vida
		Regeneração Urbana	0.0203692	0.0399262	0.112487	0.0414529	0.0548964														0.164706	0.130533	0.442126	7	49.4942	pesos	0.2	0.2	0.2	0.2	0.2
		Cultura e Criatividade	0.0311449	0.0144706	0.0559332	0.0411985	0.111917														0.157724	0.151216	0.489467	4	54.7938
		Ílhavo Inteligente	0.0297775	0.0247059	0.0397262	0.103885	0.0794882														0.162444	0.13706	0.457622	6	51.2289
		Ílhavo Inclusivo	0.0213021	0.0247437	0.0612106	0.111088	0.0650655														0.170907	0.129828	0.431702	8	48.3272
		Parque Central de Ílhavo	0.00498318	0.0810355	0.0668216	0.0743686	0.0740143														0.184349	0.0871341	0.320956	10	35.9297
		Mar e Ria	0.023892	0.133209	0.0583545	0.0145866	0.065249														0.183985	0.121566	0.397858	9	44.5386
		Turismo de Futuro	0.0394502	0.0964708	0.0656283	0.00845097	0.0626734														0.151805	0.133014	0.467012	5	52.28
		Valorização de Capital Humano	0.108807	0.0297378	0.0137934	0.0748958	0.00919976														0.0746637	0.207574	0.735458	2	82.3314
		Economia + Competitiva	0.131987	0.00547537	0.0338623	0.028779	0.00338775														0.0285655	0.239126	0.893289	1	100
		Ílhavo e o Porto de Aveiro	0.0765708	0.0494119	0.0733408	0.0346284	0.0122289														0.0964918	0.171648	0.640143	3	71.6614
		calculate ideal worst	0.00498318	0.133209	0.112487	0.111088	0.111917
		calculate ideal best	0.131987	0.00547537	0.0137934	0.00845097	0.00338775

## Sheet: Comparacao_MCDM_Nivel_0
Case-A_Alternatives	AHP	AHP	SAW (minimo)	SAW (minimo)	TOPSIS	TOPSIS	SAW (máximo)	SAW (máximo)	WPM min	WPM min	WPM max	WPM max		Matriz impacto	Matriz impacto
Regeneração Urbana	93.047	10	85.2032	3	49.8184	6	82.4053	10	68.4437	2	3.79157	9		49.314	9			ahp-saw minimo	ahp-saw maximo	ahp-topsis	ahp-wpm	saw min -topsis	saw min - saw max	saw min -wpm	topsis-wpm	topsis - saw max
Cultura e Criatividade	97.496	4	80.4866	8	52.7746	4	93.776	4	9.22556	7	28.1293	4		75.6136	4		corr. Pontuaçao	0.118356	0.472589	0.642898	-0.13709	0.689077	-0.697859	0.87314	0.54745	-0.327235
Ílhavo Inteligente	98.0777	3	73.131	10	48.6311	7	100	1	2.59509	10	100	1		78.5929	3		corr. Rank	-0.284848	0.50303	0.648485	-0.369697	0.381818	-0.927273	0.975758	0.321212	-0.284848
Ílhavo Inclusivo	96.514	5	76.8238	9	46.5013	8	96.9749	2	6.66921	9	38.9114	2		70.679	5
Parque Central de Ílhavo	95.3493	9	84.5146	6	34.531	10	93.6752	5	23.5146	6	11.0361	5		55.314	8
Mar e Ria	95.3939	8	85.1959	4	44.1909	9	87.9416	6	32.6642	4	7.94474	7		48.2645	10			ahp - matriz	saw min - matriz	saw max - matriz	topsis - matriz	WPM min - matriz	WPM max - matriz
Turismo de Futuro	95.565	7	84.7476	5	52.131	5	85.7277	7	26.8813	5	9.65388	6		55.5152	7		corr. Pontuaçao	0.938254	0.248973	0.306619	0.791983	0.0797095	0.282998
Valorização de Capital Humano	100	1	84.2473	7	81.1439	2	93.923	3	8.87432	8	29.2427	3		97.5473	2		corr. Rank	0.951515	-0.224242	0.406061	0.684848	-0.284848	0.284848
Economia + Competitiva	99.2911	2	100	1	100	1	85.6138	8	100	1	2.59509	10		100	1
Ílhavo e o Porto de Aveiro	95.6893	6	86.646	2	72.5836	3	82.7999	9	41.3085	3	6.28221	8		67.6264	6
							se considerarmos os impactos do projeto nos tres critérios com maior ponderaçao
Nível 0	0.2112	0.1964	0.1745	0.2067	0.2112			Matriz_impacto
Regeneração Urbana	0.635886	0.536529	2.44419	0.635886	1.19229		2.46406	9		49.314
Cultura e Criatividade	0.910401	0.18208	1.138	0.591761	2.276		3.77816	4		75.6136
Ílhavo Inteligente	0.859037	0.306799	0.797677	1.47264	1.59535		3.92703	3		78.5929
Ílhavo Inclusivo	0.62094	0.31047	1.24188	1.59116	1.3195		3.5316	5		70.679
Parque Central de Ílhavo	0.148064	1.03645	1.38193	1.0858	1.52999		2.76386	8		55.314
Mar e Ria	0.753631	1.80871	1.28117	0.226089	1.4319		2.41162	10		48.2645
Turismo de Futuro	1.25486	1.32091	1.453	0.132091	1.38695		2.77391	7		55.5152
Valorização de Capital Humano	3.48884	0.410452	0.307839	1.18005	0.205226		4.87412	2		97.5473
Economia + Competitiva	4.44148	0.0793122	0.793122	0.475873	0.0793122		4.99667	1		100
Ílhavo e o Porto de Aveiro	2.5343	0.703973	1.68953	0.563178	0.281589		3.37907	6		67.6264
	15.6475	6.69569	12.5283	7.95452	11.2981
	10.3344
		Regeneração Urbana	Cultura e Criatividade	Ílhavo Inteligente	Ílhavo Inclusivo	Parque Central de Ílhavo	Mar e Ria	Turismo de Futuro	Valorização de Capital Humano	Economia + Competitiva	Ílhavo e o Porto de Aveiro
Economia	0.2112	0.632107	0.966502	0.92407	0.661058	0.15464	0.741426	1.22424	3.37655	4.09588	2.37618
Património natural	0.1964	0.53334	0.1933	0.330025	0.330529	1.08248	1.77942	1.28867	0.397241	0.0731407	0.66005
Território, centralidade e marca	0.1745	2.42966	1.20813	0.858065	1.32212	1.44331	1.26042	1.41754	0.297931	0.731407	1.58412
Inclusão social	0.2067	0.632107	0.628226	1.58412	1.69396	1.13403	0.222428	0.128867	1.14207	0.438844	0.52804
+ Qualidade de vida	0.2112	1.1852	2.41626	1.71613	1.40475	1.59795	1.40871	1.3531	0.198621	0.0731407	0.26402
		5.41241	5.41241	5.41241	5.41241	5.41241	5.41241	5.41241	5.41241	5.41241	5.41241
		Regeneração Urbana	Cultura e Criatividade	Ílhavo Inteligente	Ílhavo Inclusivo	Parque Central de Ílhavo	Mar e Ria	Turismo de Futuro	Valorização de Capital Humano	Economia + Competitiva	Ílhavo e o Porto de Aveiro
correlação		-0.797185	0.204234	0.485706	-0.0119188	-0.387714	-0.344426	-0.331869	0.467526	0.29056	-0.177773
Economia	0.2112	0.116788	0.178571	0.170732	0.122137	0.0285714	0.136986	0.22619	0.623853	0.756757	0.439024
Património natural	0.1964	0.0985401	0.0357143	0.0609756	0.0610687	0.2	0.328767	0.238095	0.0733945	0.0135135	0.121951
Território, centralidade e marca	0.1745	0.448905	0.223214	0.158537	0.244275	0.266667	0.232877	0.261905	0.0550459	0.135135	0.292683
Inclusão social	0.2067	0.116788	0.116071	0.292683	0.312977	0.209524	0.0410959	0.0238095	0.211009	0.0810811	0.097561
+ Qualidade de vida	0.2112	0.218978	0.446429	0.317073	0.259542	0.295238	0.260274	0.25	0.0366972	0.0135135	0.0487805
		-0.797185	0.204234	0.485706	-0.0119188	-0.387714	-0.344426	-0.331869	0.467526	0.29056	-0.177773

## Sheet: Comparacao_NeutralScenario
Rank comparision	AHP_1	AHP_neutral	SAW_1	SAW_neutral	WPM_1	WPM_Neutral	TOPSIS_1	TOPSIS_neutral
	10	10	10	3	9	3	6	7
	4	4	4	5	4	5	4	4
	3	3	1	8	1	7	7	6
	5	5	2	7	2	8	8	8
	9	9	5	4	5	6	10	10
	8	8	6	1	7	2	9	9
	7	7	7	2	6	1	5	5
	1	1	3	10	3	9	2	2
	2	2	8	9	10	10	1	1
	6	6	9	6	8	4	3	3
correlate	AHP	SAW	WPM	TOPSIS
	1	-0.418182	-0.284848	0.987879
Municipio A

[truncated: 3 more sheets: Comparacao_de_3_MCDM_Nivel_0, SAW_nivel_0_minimo, WPM_nivel_0]
