# Supplementary material
Source: Research Square preprint supplement (doi:10.21203/rs.3.rs-9567597/v1)
Supplement: Supplementary file 3 [file 938875ec2218785b50425de2.xlsx]

## Sheet: respostas_original
id	matrix	session_id	matrixid	r2	consistent	complete	retries	dim	vetor_1	vetor_2	vetor_3	vetor_4	vetor_5
1	1.00,1.00,2.00,0.50,2.00,1.00,1.00,2.00,2.00,2.00,0.50,0.50,1.00,0.50,2.00,2.00,0.50,2.00,1.00,2.00,0.50,0.50,0.50,0.50,1.00	57599063e1a4e	0	0.6958	1	1	0	5	0.2171	0.2838	0.1419	0.2508	0.1063
2	1.00,0.33,3.00,0.33,0.50,3.00,1.00,2.00,0.50,0.50,0.33,0.50,1.00,0.33,0.33,3.00,2.00,3.00,1.00,1.00,2.00,2.00,3.00,1.00,1.00	57599061ba86b	0	0.7434	1	1	0	5	0.1339	0.1935	0.082	0.306	0.2846
3	1.00,0.33,0.25,0.25,0.33,3.00,1.00,3.00,0.50,3.00,4.00,0.33,1.00,0.25,0.33,4.00,2.00,4.00,1.00,4.00,3.00,0.33,3.00,0.25,1.00	575990735e77f	0	0.6600	1	1	0	5	0.0644	0.257	0.1177	0.4056	0.1553
5	1.00,4.00,3.00,0.50,0.25,0.25,1.00,2.00,0.50,0.25,0.33,0.50,1.00,0.50,0.33,2.00,2.00,2.00,1.00,0.33,4.00,4.00,3.00,3.00,1.00	5759908bc9f88	0	0.6470	1	1	0	5	0.1917	0.1016	0.0846	0.191	0.431
6	1.00,3.00,2.00,1.00,2.00,0.33,1.00,3.00,0.33,0.50,0.50,0.33,1.00,0.33,0.33,1.00,3.00,3.00,1.00,2.00,0.50,2.00,3.00,0.50,1.00	575990795b95b	0	0.7226	1	1	0	5	0.2893	0.1296	0.0863	0.306	0.1887
7	1.00,1.00,3.00,0.33,3.00,1.00,1.00,3.00,0.33,3.00,0.33,0.33,1.00,0.33,0.33,3.00,3.00,3.00,1.00,3.00,0.33,0.33,3.00,0.33,1.00	575990d88a544	0	0.6442	1	1	0	5	0.2034	0.2034	0.0739	0.4017	0.1176
9	1.00,4.00,4.00,4.00,4.00,0.25,1.00,4.00,1.00,0.50,0.25,0.25,1.00,0.25,0.33,0.25,1.00,4.00,1.00,3.00,0.25,2.00,3.00,0.33,1.00	575990a45f627	0	0.6219	1	1	0	5	0.4591	0.1409	0.0587	0.1975	0.1438
10	1.00,2.00,3.00,2.00,2.00,0.50,1.00,3.00,0.33,3.00,0.33,0.33,1.00,3.00,0.33,0.50,3.00,0.33,1.00,0.33,0.50,0.33,3.00,3.00,1.00	575990860a571	0	0.3188	0	1	2	5	0.2915	0.2205	0.1272	0.1632	0.1976
11	1.00,0.33,2.00,0.33,0.25,3.00,1.00,3.00,0.33,0.33,0.50,0.33,1.00,0.33,0.33,3.00,3.00,3.00,1.00,3.00,4.00,3.00,3.00,0.33,1.00	575990841ba16	0	0.6501	1	1	1	5	0.0982	0.1704	0.0762	0.3882	0.2671
14	1.00,1.00,3.00,3.00,3.00,1.00,1.00,3.00,1.00,3.00,0.33,0.33,1.00,0.33,1.00,0.33,1.00,3.00,1.00,3.00,0.33,0.33,1.00,0.33,1.00	57599077e5850	0	0.8534	1	1	1	5	0.3362	0.2656	0.0885	0.2212	0.0885
17	1.00,0.50,0.50,0.50,0.33,2.00,1.00,3.00,2.00,1.00,2.00,0.33,1.00,1.00,1.00,2.00,0.50,1.00,1.00,2.00,3.00,1.00,1.00,0.50,1.00	575990a34f492	0	0.6025	1	1	0	5	0.0979	0.3098	0.1683	0.2158	0.2083
22	1.00,2.00,3.00,1.00,0.50,0.50,1.00,1.00,0.50,0.33,0.33,1.00,1.00,0.50,0.33,1.00,2.00,2.00,1.00,1.00,2.00,3.00,3.00,1.00,1.00	57599092c9720	0	0.9181	1	1	0	5	0.2274	0.109	0.1021	0.239	0.3226
31	1.00,1.00,0.50,2.00,3.00,1.00,1.00,2.00,2.00,2.00,2.00,0.50,1.00,0.50,3.00,0.50,0.50,2.00,1.00,2.00,0.33,0.50,0.33,0.50,1.00	575990a620e8d	0	0.6127	1	1	0	5	0.2369	0.2701	0.2168	0.1875	0.0886
38	1.00,0.33,3.00,3.00,0.33,3.00,1.00,4.00,2.00,3.00,0.33,0.25,1.00,0.50,0.50,0.33,0.50,2.00,1.00,1.00,3.00,0.33,2.00,1.00,1.00	575990bbd8a50	0	0.6463	1	1	2	5	0.1951	0.3839	0.0765	0.1444	0.2001
40	1.00,0.33,1.00,0.33,0.50,3.00,1.00,1.00,0.33,0.50,1.00,1.00,1.00,0.33,0.33,3.00,3.00,3.00,1.00,0.50,2.00,2.00,3.00,2.00,1.00	5759907e6fd25	0	0.7285	1	1	0	5	0.1033	0.1615	0.1097	0.2938	0.3318
67	1.00,2.00,2.00,1.00,0.50,0.50,1.00,0.50,0.50,0.50,0.50,2.00,1.00,0.50,0.50,1.00,2.00,2.00,1.00,1.00,2.00,2.00,2.00,1.00,1.00	575990aaac58e	0	0.7940	1	1	0	5	0.2163	0.1091	0.1447	0.2449	0.2849
72	1.00,2.00,2.00,1.00,2.00,0.50,1.00,1.00,0.50,1.00,0.50,1.00,1.00,0.50,0.50,1.00,2.00,2.00,1.00,2.00,0.50,1.00,2.00,0.50,1.00	575990b2012ec	0	0.8883	1	1	0	5	0.283	0.1415	0.1261	0.283	0.1665
73	1.00,3.00,3.00,3.00,3.00,0.33,1.00,3.00,3.00,3.00,0.33,0.33,1.00,0.33,3.00,0.33,0.33,3.00,1.00,3.00,0.33,0.33,0.33,0.33,1.00	575990a55440f	0	0.6045	1	1	1	5	0.3882	0.2511	0.1161	0.1722	0.0724
80	1.00,3.00,3.00,0.33,3.00,0.33,1.00,3.00,0.33,3.00,0.33,0.33,1.00,0.50,3.00,3.00,3.00,2.00,1.00,4.00,0.33,0.33,0.33,0.25,1.00	575990a6b6c59	0	0.6484	1	1	0	5	0.253	0.1741	0.1277	0.381	0.0641
89	1.00,0.33,4.00,3.00,3.00,3.00,1.00,4.00,4.00,2.00,0.25,0.25,1.00,0.25,0.25,0.33,0.25,4.00,1.00,2.00,0.33,0.50,4.00,0.50,1.00	575990d33e237	0	0.6398	1	1	1	5	0.2576	0.3947	0.0551	0.1534	0.1391
92	1.00,0.33,1.00,0.33,1.00,3.00,1.00,3.00,1.00,1.00,1.00,0.33,1.00,0.33,1.00,3.00,1.00,3.00,1.00,2.00,1.00,1.00,1.00,0.50,1.00	575990bd50bba	0	0.8941	1	1	0	5	0.117	0.2844	0.117	0.3177	0.1639
103	1.00,0.33,1.00,0.33,4.00,3.00,1.00,1.00,1.00,4.00,1.00,1.00,1.00,0.33,1.00,3.00,1.00,3.00,1.00,4.00,0.25,0.25,1.00,0.25,1.00	575990c388ede	0	0.7712	1	1	0	5	0.1514	0.2828	0.1458	0.34	0.08
113	1.00,1.00,1.00,1.00,1.00,1.00,1.00,1.00,1.00,1.00,1.00,1.00,1.00,1.00,1.00,1.00,1.00,1.00,1.00,1.00,1.00,1.00,1.00,1.00,1.00	5759911da18e6	0	1.0000	1	1	1	5	0.2	0.2	0.2	0.2	0.2
139	1.00,0.25,2.00,0.33,0.25,4.00,1.00,4.00,0.33,0.33,0.50,0.25,1.00,0.25,0.25,3.00,3.00,4.00,1.00,3.00,4.00,3.00,4.00,0.33,1.00	575996c2b7239	0	0.6880	1	1	1	5	0.0893	0.1874	0.0606	0.3944	0.2683
145	1.00,2.00,3.00,3.00,2.00,0.50,1.00,1.00,2.00,1.00,0.33,1.00,1.00,2.00,1.00,0.33,0.50,0.50,1.00,0.50,0.50,1.00,1.00,2.00,1.00	575999fa1db6a	0	0.8999	1	1	0	5	0.3728	0.181	0.1685	0.0967	0.181
151	1.00,4.00,4.00,4.00,4.00,0.25,1.00,0.25,0.25,4.00,0.25,4.00,1.00,0.25,4.00,0.25,4.00,4.00,1.00,4.00,0.25,0.25,0.25,0.25,1.00	5759aa8cd749a	0	0.5308	0	1	2	5	0.4308	0.1011	0.1622	0.2514	0.0545
152	1.00,4.00,4.00,4.00,4.00,0.25,1.00,4.00,4.00,0.25,0.25,0.25,1.00,4.00,0.25,0.25,0.25,0.25,1.00,0.25,0.25,4.00,4.00,4.00,1.00	5759aa7e43154	0	0.5308	0	1	2	5	0.4308	0.1622	0.1011	0.0545	0.2514
153	1.00,3.00,3.00,1.00,1.00,0.33,1.00,0.33,0.33,0.50,0.33,3.00,1.00,0.33,3.00,1.00,3.00,3.00,1.00,3.00,1.00,2.00,0.33,0.33,1.00	5759aaaf41d27	0	0.6375	1	1	1	5	0.273	0.0775	0.1871	0.3201	0.1423
155	1.00,3.00,3.00,1.00,1.00,0.33,1.00,1.00,0.50,0.50,0.33,1.00,1.00,0.50,0.50,1.00,2.00,2.00,1.00,2.00,1.00,2.00,2.00,0.50,1.00	5759aa8b928c3	0	0.8808	1	1	0	5	0.285	0.1112	0.1112	0.2806	0.212
157	1.00,1.00,0.50,1.00,0.50,1.00,1.00,0.50,4.00,4.00,2.00,2.00,1.00,3.00,2.00,1.00,0.25,0.33,1.00,0.50,2.00,0.25,0.50,2.00,1.00	5759aaa718cfc	0	0.6411	1	1	0	5	0.139	0.281	0.3212	0.0939	0.1649
158	1.00,1.00,0.50,1.00,0.33,1.00,1.00,0.33,1.00,0.33,2.00,3.00,1.00,1.00,0.33,1.00,1.00,1.00,1.00,0.33,3.00,3.00,3.00,3.00,1.00	5759aaafb73f1	0	0.8345	1	1	1	5	0.1215	0.1158	0.2081	0.1387	0.416
162	1.00,0.50,1.00,0.50,0.50,2.00,1.00,2.00,0.50,1.00,1.00,0.50,1.00,1.00,1.00,2.00,2.00,1.00,1.00,1.00,2.00,1.00,1.00,1.00,1.00	5759aae814ba9	0	0.6233	1	1	0	5	0.1256	0.2261	0.1728	0.2578	0.2178
166	1.00,3.00,3.00,2.00,3.00,0.33,1.00,2.00,0.50,2.00,0.33,0.50,1.00,0.50,2.00,0.50,2.00,2.00,1.00,3.00,0.33,0.50,0.50,0.33,1.00	5759aad5b86e7	0	0.8422	1	1	0	5	0.3832	0.1617	0.1239	0.2449	0.0863
168	1.00,0.50,0.50,0.50,1.00,2.00,1.00,0.50,0.50,2.00,2.00,2.00,1.00,0.50,3.00,2.00,2.00,2.00,1.00,3.00,1.00,0.50,0.33,0.33,1.00	5759aa901b810	0	0.8581	1	1	0	5	0.12	0.1817	0.2581	0.3396	0.1006
170	1.00,4.00,4.00,4.00,4.00,0.25,1.00,1.00,0.33,0.50,0.25,1.00,1.00,0.33,0.50,0.25,3.00,3.00,1.00,2.00,0.25,2.00,2.00,0.50,1.00	5759aac5d9357	0	0.8160	1	1	0	5	0.4752	0.0847	0.0847	0.2165	0.1389
177	1.00,2.00,2.00,0.50,2.00,0.50,1.00,0.50,0.50,0.50,0.50,2.00,1.00,0.50,0.50,2.00,2.00,2.00,1.00,2.00,0.50,2.00,2.00,0.50,1.00	5759aa92d6635	0	0.7072	1	1	0	5	0.2422	0.1078	0.1433	0.32	0.1867
180	1.00,2.00,2.00,3.00,1.00,0.50,1.00,0.50,3.00,0.33,0.50,2.00,1.00,2.00,2.00,0.33,0.33,0.50,1.00,0.33,1.00,3.00,0.50,3.00,1.00	5759aac2b6fa8	0	0.6984	1	1	0	5	0.2897	0.1405	0.2415	0.0812	0.2471
182	1.00,3.00,2.00,2.00,4.00,0.33,1.00,4.00,4.00,4.00,0.50,0.25,1.00,4.00,2.00,0.50,0.25,0.25,1.00,1.00,0.25,0.25,0.50,1.00,1.00	5759ab5647ce4	0	0.6439	1	1	0	5	0.3553	0.3045	0.175	0.089	0.0761
184	1.00,0.50,2.00,0.25,2.00,2.00,1.00,4.00,0.50,2.00,0.50,0.25,1.00,0.33,1.00,4.00,2.00,3.00,1.00,2.00,0.50,0.50,1.00,0.50,1.00	5759aa9137d69	0	0.7269	1	1	2	5	0.1542	0.2585	0.0933	0.3761	0.1179
213	1.00,3.00,3.00,1.00,2.00,0.33,1.00,0.50,0.50,0.50,0.33,2.00,1.00,0.33,0.50,1.00,2.00,3.00,1.00,0.50,0.50,2.00,2.00,2.00,1.00	5759ab7b23973	0	0.7722	1	1	0	5	0.3166	0.0945	0.1181	0.2299	0.2409
227	1.00,1.00,3.00,4.00,3.00,1.00,1.00,4.00,1.00,3.00,0.33,0.25,1.00,0.33,1.00,0.25,1.00,3.00,1.00,1.00,0.33,0.33,1.00,1.00,1.00	5759aae6d3a78	0	0.7591	1	1	1	5	0.3501	0.285	0.0848	0.1725	0.1076
236	1.00,3.00,3.00,1.00,4.00,0.33,1.00,2.00,0.50,3.00,0.33,0.50,1.00,1.00,3.00,1.00,2.00,1.00,1.00,3.00,0.25,0.33,0.33,0.33,1.00	5759aae8da8cb	0	0.8130	1	1	0	5	0.3475	0.1756	0.1598	0.2494	0.0677
238	1.00,1.00,2.00,0.50,2.00,1.00,1.00,2.00,0.50,2.00,0.50,0.50,1.00,0.50,2.00,2.00,2.00,2.00,1.00,2.00,0.50,0.50,0.50,0.50,1.00	5759aae02b60d	0	0.7520	1	1	0	5	0.2111	0.2111	0.1444	0.3244	0.1089
242	1.00,2.00,4.00,1.00,2.00,0.50,1.00,2.00,1.00,4.00,0.25,0.50,1.00,1.00,1.00,1.00,1.00,1.00,1.00,3.00,0.50,0.25,1.00,0.33,1.00	5759aaf119c56	0	0.6779	1	1	0	5	0.3172	0.2362	0.123	0.2266	0.0971
246	1.00,2.00,3.00,2.00,2.00,0.50,1.00,2.00,1.00,1.00,0.33,0.50,1.00,0.50,2.00,0.50,1.00,2.00,1.00,1.00,0.50,1.00,0.50,1.00,1.00	5759aaca739c9	0	0.7352	1	1	0	5	0.3438	0.1837	0.1406	0.1837	0.1484
247	1.00,2.00,3.00,2.00,0.50,0.50,1.00,2.00,1.00,0.50,0.33,0.50,1.00,0.33,0.50,0.50,1.00,3.00,1.00,2.00,2.00,2.00,2.00,0.50,1.00	5759aa9639222	0	0.6771	1	1	0	5	0.2672	0.1538	0.085	0.2387	0.2553
251	1.00,1.00,4.00,1.00,1.00,1.00,1.00,4.00,1.00,1.00,0.25,0.25,1.00,1.00,1.00,1.00,1.00,1.00,1.00,1.00,1.00,1.00,1.00,1.00,1.00	5759ab275fd2f	0	0.6028	1	1	0	5	0.2468	0.2468	0.1217	0.1923	0.1923
262	1.00,3.00,1.00,2.00,3.00,0.33,1.00,1.00,1.00,1.00,1.00,1.00,1.00,1.00,1.00,0.50,1.00,1.00,1.00,1.00,0.33,1.00,1.00,1.00,1.00	5759aadf01cb3	0	0.7786	1	1	1	5	0.3413	0.1515	0.1936	0.1621	0.1515
265	1.00,3.00,3.00,3.00,3.00,0.33,1.00,2.00,0.33,0.33,0.33,0.50,1.00,0.25,0.33,0.33,3.00,4.00,1.00,0.50,0.33,3.00,3.00,2.00,1.00	5759ac0419e99	0	0.6675	1	1	0	5	0.3963	0.1014	0.074	0.197	0.2313
267	1.00,3.00,4.00,4.00,3.00,0.33,1.00,1.00,1.00,3.00,0.25,1.00,1.00,0.50,1.00,0.25,1.00,2.00,1.00,2.00,0.33,0.33,1.00,0.50,1.00	5759ab2ec3095		0.7886	1	1	1	5	0.4502	0.1731	0.1112	0.1677	0.0978
275	1.00,2.00,0.33,0.33,0.50,0.50,1.00,0.33,0.33,0.33,3.00,3.00,1.00,0.33,3.00,3.00,3.00,3.00,1.00,3.00,2.00,3.00,0.33,0.33,1.00	5759aaae53667	0	0.6918	1	1	1	5	0.1091	0.0776	0.2583	0.3955	0.1595
279	1.00,0.33,1.00,0.50,1.00,3.00,1.00,2.00,2.00,2.00,1.00,0.50,1.00,1.00,1.00,2.00,0.50,1.00,1.00,1.00,1.00,0.50,1.00,1.00,1.00	5759aaa0ddafa	0	0.9093	1	1	0	5	0.1334	0.3516	0.1633	0.1883	0.1633
297	1.00,1.00,4.00,1.00,1.00,1.00,1.00,2.00,0.33,1.00,0.25,0.50,1.00,0.33,0.33,1.00,3.00,3.00,1.00,3.00,1.00,1.00,3.00,0.33,1.00	5759ab3119eab	0	0.7603	1	1	1	5	0.2376	0.1624	0.0753	0.3469	0.1778
4	1.00,1.00,1.00,1.00,1.00,2.00,1.00,0.50,1.00	57599063e1a4e	1.0	0.6733	1	1	1	3	0.3278	0.4111	0.2611
8	1.00,1.00,0.33,1.00,1.00,1.00,3.00,1.00,1.00	57599061ba86b	1.0	0.6844	1	1	0	3	0.2254	0.3206	0.454
12	1.00,0.50,2.00,2.00,1.00,0.50,0.50,2.00,1.00	575990735e77f	1.0	1.0000	1	1	0	3	0.3333	0.3333	0.3333
13	1.00,2.00,2.00,0.50,1.00,0.50,0.50,2.00,1.00	57599063e1a4e	1.1	0.8227	1	1	0	3	0.4905	0.1976	0.3119
15	1.00,2.00,2.00,0.50,1.00,1.00,0.50,1.00,1.00	57599061ba86b	1.1	1.0000	1	1	0	3	0.5	0.25	0.25
16	1.00,3.00,3.00,0.33,1.00,0.33,0.33,3.00,1.00	5759908bc9f88	1.0	0.7472	1	1	0	3	0.5736	0.1399	0.2864
18	1.00,0.25,0.33,4.00,1.00,4.00,3.00,0.25,1.00	575990735e77f	1.1	0.7851	1	1	0	3	0.1181	0.6389	0.2431
19	1.00,3.00,2.00,0.33,1.00,1.00,0.50,1.00,1.00	575990d88a544	1.0	0.9504	1	1	1	3	0.5485	0.2106	0.2409
20	1.00,2.00,0.50,0.50,1.00,0.50,2.00,2.00,1.00	575990a45f627	1.0	0.8227	1	1	0	3	0.3119	0.1976	0.4905
21	1.00,3.00,0.50,0.33,1.00,0.33,2.00,3.00,1.00	575990795b95b	1.0	0.8833	1	1	0	3	0.3338	0.1416	0.5247
23	1.00,0.50,0.50,2.00,1.00,2.00,2.00,0.50,1.00	57599063e1a4e	1.2	0.8227	1	1	0	3	0.1976	0.4905	0.3119
24	1.00,1.00,2.00,1.00,1.00,2.00,0.50,0.50,1.00	57599061ba86b	1.2	1.0000	1	1	0	3	0.4	0.4	0.2
25	1.00,4.00,0.50,0.25,1.00,0.33,2.00,3.00,1.00	575990735e77f	1.2	0.7969	1	1	0	3	0.3601	0.1279	0.5119
26	1.00,0.33,0.33,3.00,1.00,0.50,3.00,2.00,1.00	5759908bc9f88	1.1	0.8833	1	1	0	3	0.1416	0.3338	0.5247
27	1.00,0.33,0.50,3.00,1.00,2.00,2.00,0.50,1.00	575990795b95b	1.1	0.9774	1	1	0	3	0.1638	0.539	0.2973
28	1.00,3.00,3.00,0.33,1.00,0.50,0.33,2.00,1.00	575990841ba16	1.0	0.8823	1	1	0	3	0.5889	0.1593	0.2519
29	1.00,3.00,2.00,0.33,1.00,2.00,0.50,0.50,1.00	575990860a571	1.0	0.6831	1	1	0	3	0.5374	0.268	0.1946
30	1.00,3.00,1.00,0.33,1.00,0.50,1.00,2.00,1.00	57599077e5850	1.0	0.9503	1	1	0	3	0.4429	0.1698	0.3873
32	1.00,0.50,1.00,2.00,1.00,2.00,1.00,0.50,1.00	575990a45f627	1.1	1.0000	1	1	0	3	0.25	0.5	0.25
33	1.00,2.00,1.00,0.50,1.00,0.50,1.00,2.00,1.00	57599063e1a4e	1.3	1.0000	1	1	0	3	0.4	0.2	0.4
34	1.00,3.00,0.50,0.33,1.00,0.50,2.00,2.00,1.00	575990735e77f	1.3	0.6857	1	1	0	3	0.35	0.1722	0.4778
35	1.00,3.00,3.00,0.33,1.00,1.00,0.33,1.00,1.00	575990d88a544	1.1	1.0000	1	1	0	3	0.6	0.2	0.2
36	1.00,0.50,0.25,2.00,1.00,0.25,4.00,4.00,1.00	5759908bc9f88	1.2	0.9029	1	1	0	3	0.1335	0.2114	0.6551
37	1.00,1.00,4.00,1.00,1.00,1.00,0.25,1.00,1.00	57599061ba86b	1.3	0.6951	1	1	0	3	0.4815	0.3148	0.2037
39	1.00,3.00,1.00,0.33,1.00,0.50,1.00,2.00,1.00	575990a34f492	1.0	0.9503	1	1	0	3	0.4429	0.1698	0.3873
41	1.00,0.33,0.50,3.00,1.00,3.00,2.00,0.33,1.00	575990795b95b	1.2	0.8823	1	1	0	3	0.1593	0.5889	0.2519
42	1.00,4.00,0.25,0.25,1.00,0.25,4.00,4.00,1.00	5759908bc9f88	1.3	0.6912	1	1	0	3	0.2672	0.1085	0.6243
43	1.00,1.00,2.00,1.00,1.00,2.00,0.50,0.50,1.00	57599063e1a4e	1.4	1.0000	1	1	0	3	0.4	0.4	0.2
44	1.00,1.00,0.50,1.00,1.00,0.33,2.00,3.00,1.00	575990735e77f	1.4	0.9504	1	1	1	3	0.2409	0.2106	0.5485
45	1.00,1.00,1.00,1.00,1.00,0.33,1.00,3.00,1.00	575990d88a544	1.2	0.6844	1	1	0	3	0.3206	0.2254	0.454
46	1.00,0.33,3.00,3.00,1.00,3.00,0.33,0.33,1.00	575990841ba16	1.1	0.7472	1	1	0	3	0.2864	0.5736	0.1399
47	1.00,3.00,1.00,0.33,1.00,1.00,1.00,1.00,1.00	57599077e5850	1.1	0.6844	1	1	0	3	0.454	0.2254	0.3206
48	1.00,0.50,3.00,2.00,1.00,4.00,0.33,0.25,1.00	575990860a571	1.1	0.9667	1	1	0	3	0.3202	0.5571	0.1226
49	1.00,1.00,2.00,1.00,1.00,2.00,0.50,0.50,1.00	57599092c9720	1.0	1.0000	1	1	0	3	0.4	0.4	0.2
50	1.00,1.00,0.33,1.00,1.00,0.33,3.00,3.00,1.00	57599061ba86b	1.4	1.0000	1	1	0	3	0.2	0.2	0.6
51	1.00,0.33,0.50,3.00,1.00,2.00,2.00,0.50,1.00	5759908bc9f88	1.4	0.9774	1	1	0	3	0.1638	0.539	0.2973
52	1.00,3.00,3.00,0.33,1.00,3.00,0.33,0.33,1.00	575990a620e8d	1.0	0.7472	1	1	0	3	0.5736	0.2864	0.1399
53	1.00,2.00,0.50,0.50,1.00,1.00,2.00,1.00,1.00	575990a45f627	1.2	0.2913	0	1	1	3	0.3286	0.2643	0.4071
54	1.00,1.00,1.00,1.00,1.00,1.00,1.00,1.00,1.00	575990d88a544	1.3	1.0000	1	1	0	3	0.3333	0.3333	0.3333
55	1.00,0.50,0.50,2.00,1.00,2.00,2.00,0.50,1.00	575990a34f492	1.1	0.8227	1	1	0	3	0.1976	0.4905	0.3119
56	1.00,1.00,0.33,1.00,1.00,0.33,3.00,3.00,1.00	575990bbd8a50	1.0	1.0000	1	1	1	3	0.2	0.2	0.6
57	1.00,2.00,2.00,0.50,1.00,1.00,0.50,1.00,1.00	575990795b95b	1.3	1.0000	1	1	1	3	0.5	0.25	0.25
58	1.00,2.00,2.00,0.50,1.00,0.50,0.50,2.00,1.00	575990a45f627	1.3	0.8227	1	1	0	3	0.4905	0.1976	0.3119
59	1.00,0.33,0.33,3.00,1.00,0.33,3.00,3.00,1.00	575990860a571	1.2	0.7472	1	1	0	3	0.1399	0.2864	0.5736
60	1.00,4.00,3.00,0.25,1.00,3.00,0.33,0.33,1.00	575990841ba16	1.2	0.6447	1	1	0	3	0.6034	0.258	0.1386
61	1.00,3.00,4.00,0.33,1.00,2.00,0.25,0.50,1.00	575990a34f492	1.2	0.9665	1	1	0	3	0.6232	0.2395	0.1373
62	1.00,0.50,1.00,2.00,1.00,2.00,1.00,0.50,1.00	57599092c9720	1.1	1.0000	1	1	0	3	0.25	0.5	0.25
63	1.00,3.00,0.33,0.33,1.00,0.33,3.00,3.00,1.00	5759907e6fd25	1.0	0.7472	1	1	0	3	0.2864	0.1399	0.5736
64	1.00,0.33,0.33,3.00,1.00,3.00,3.00,0.33,1.00	575990d88a544	1.4	0.7472	1	1	0	3	0.1399	0.5736	0.2864
65	1.00,0.33,0.33,3.00,1.00,0.50,3.00,2.00,1.00	575990795b95b	1.4	0.8833	1	1	0	3	0.1416	0.3338	0.5247
66	1.00,0.50,0.50,2.00,1.00,2.00,2.00,0.50,1.00	575990bbd8a50	1.1	0.8227	1	1	1	3	0.1976	0.4905	0.3119
68	1.00,3.00,2.00,0.33,1.00,0.50,0.50,2.00,1.00	575990a34f492	1.3	0.9774	1	1	0	3	0.539	0.1638	0.2973
69	1.00,1.00,1.00,1.00,1.00,2.00,1.00,0.50,1.00	575990a45f627	1.4	0.6733	1	1	0	3	0.3278	0.4111	0.2611
70	1.00,2.00,2.00,0.50,1.00,3.00,0.50,0.33,1.00	575990a620e8d	1.1	0.6857	1	1	1	3	0.4778	0.35	0.1722
71	1.00,3.00,3.00,0.33,1.00,0.50,0.33,2.00,1.00	575990860a571	1.3	0.8823	1	1	0	3	0.5889	0.1593	0.2519
74	1.00,1.00,1.00,1.00,1.00,2.00,1.00,0.50,1.00	575990a34f492	1.4	0.6733	1	1	0	3	0.3278	0.4111	0.2611
75	1.00,1.00,0.50,1.00,1.00,0.50,2.00,2.00,1.00	57599092c9720	1.2	1.0000	1	1	0	3	0.25	0.25	0.5
76	1.00,2.00,2.00,0.50,1.00,3.00,0.50,0.33,1.00	575990841ba16	1.3	0.6857	1	1	0	3	0.4778	0.35	0.1722
77	1.00,1.00,4.00,1.00,1.00,3.00,0.25,0.33,1.00	575990bbd8a50	1.2	0.9808	1	1	0	3	0.4577	0.416	0.1263
78	1.00,1.00,1.00,1.00,1.00,1.00,1.00,1.00,1.00	57599092c9720	1.3	1.0000	1	1	0	3	0.3333	0.3333	0.3333
79	1.00,1.00,3.00,1.00,1.00,3.00,0.33,0.33,1.00	57599077e5850	1.2	1.0000	1	1	0	3	0.4286	0.4286	0.1429
81	1.00,0.50,0.50,2.00,1.00,1.00,2.00,1.00,1.00	5759907e6fd25	1.1	1.0000	1	1	0	3	0.2	0.4	0.4
82	1.00,0.50,3.00,2.00,1.00,3.00,0.33,0.33,1.00	575990860a571	1.4	0.8833	1	1	0	3	0.3338	0.5247	0.1416
83	1.00,0.33,0.33,3.00,1.00,3.00,3.00,0.33,1.00	575990841ba16	1.4	0.7472	1	1	0	3	0.1399	0.5736	0.2864
84	1.00,1.00,1.00,1.00,1.00,1.00,1.00,1.00,1.00	57599092c9720	1.4	1.0000	1	1	0	3	0.3333	0.3333	0.3333
85	1.00,4.00,3.00,0.25,1.00,0.25,0.33,4.00,1.00	575990bbd8a50	1.3	0.7890	1	1	0	3	0.594	0.1093	0.2968
86	1.00,2.00,3.00,0.50,1.00,1.00,0.33,1.00,1.00	575990a620e8d	1.2	0.9504	1	1	0	3	0.5485	0.2409	0.2106
87	1.00,1.00,0.50,1.00,1.00,0.33,2.00,3.00,1.00	5759907e6fd25	1.2	0.9504	1	1	0	3	0.2409	0.2106	0.5485
88	1.00,0.50,0.33,2.00,1.00,0.33,3.00,3.00,1.00	575990bbd8a50	1.4	0.8823	1	1	0	3	0.1593	0.2519	0.5889
90	1.00,0.33,0.33,3.00,1.00,3.00,3.00,0.33,1.00	575990a55440f	1.0	0.7472	1	1	0	3	0.1399	0.5736	0.2864
91	1.00,3.00,0.33,0.33,1.00,0.50,3.00,2.00,1.00	575990aaac58e	1.0	0.5342	0	1	1	3	0.3042	0.1721	0.5237
93	1.00,1.00,2.00,1.00,1.00,2.00,0.50,0.50,1.00	575990a620e8d	1.3	1.0000	1	1	0	3	0.4	0.4	0.2
94	1.00,3.00,3.00,0.33,1.00,1.00,0.33,1.00,1.00	57599077e5850	1.3	1.0000	1	1	0	3	0.6	0.2	0.2
95	1.00,3.00,1.00,0.33,1.00,1.00,1.00,1.00,1.00	5759907e6fd25	1.3	0.6844	1	1	0	3	0.454	0.2254	0.3206
96	1.00,3.00,2.00,0.33,1.00,0.50,0.50,2.00,1.00	575990b2012ec	1.0	0.9774	1	1	0	3	0.539	0.1638	0.2973
97	1.00,0.33,1.00,3.00,1.00,3.00,1.00,0.33,1.00	575990a620e8d	1.4	1.0000	1	1	0	3	0.2	0.6	0.2
98	1.00,1.00,1.00,1.00,1.00,2.00,1.00,0.50,1.00	5759907e6fd25	1.4	0.6733	1	1	0	3	0.3278	0.4111	0.2611
99	1.00,3.00,3.00,0.33,1.00,4.00,0.33,0.25,1.00	575990d33e237	1.0	0.6510	1	1	0	3	0.5603	0.3118	0.1279
100	1.00,3.00,3.00,0.33,1.00,3.00,0.33,0.33,1.00	575990a55440f	1.1	0.7472	1	1	0	3	0.5736	0.2864	0.1399
101	1.00,1.00,3.00,1.00,1.00,3.00,0.33,0.33,1.00	57599077e5850	1.4	1.0000	1	1	0	3	0.4286	0.4286	0.1429
102	1.00,0.50,0.33,2.00,1.00,0.50,3.00,2.00,1.00	575990a6b6c59	1.0	0.9774	1	1	1	3	0.1638	0.2973	0.539
104	1.00,0.33,0.33,3.00,1.00,0.33,3.00,3.00,1.00	575990a55440f	1.2	0.7472	1	1	0	3	0.1399	0.2864	0.5736
105	1.00,0.50,0.33,2.00,1.00,0.33,3.00,3.00,1.00	575990b2012ec	1.1	0.8823	1	1	0	3	0.1593	0.2519	0.5889
106	1.00,3.00,2.00,0.33,1.00,2.00,0.50,0.50,1.00	575990bd50bba	1.0	0.6831	1	1	0	3	0.5374	0.268	0.1946
107	1.00,0.50,2.00,2.00,1.00,2.00,0.50,0.50,1.00	575990aaac58e	1.1	0.8227	1	1	0	3	0.3119	0.4905	0.1976
108	1.00,4.00,4.00,0.25,1.00,0.33,0.25,3.00,1.00	575990a55440f	1.3	0.7851	1	1	0	3	0.6389	0.1181	0.2431
109	1.00,0.25,0.25,4.00,1.00,4.00,4.00,0.25,1.00	575990d33e237	1.1	0.6912	1	1	0	3	0.1085	0.6243	0.2672
110	1.00,0.50,1.00,2.00,1.00,2.00,1.00,0.50,1.00	575990bd50bba	1.1	1.0000	1	1	0	3	0.25	0.5	0.25
111	1.00,1.00,0.33,1.00,1.00,0.50,3.00,2.00,1.00	575990b2012ec	1.2	0.9504	1	1	0	3	0.2106	0.2409	0.5485
112	1.00,0.25,4.00,4.00,1.00,4.00,0.25,0.25,1.00	575990c388ede	1.0	0.6912	1	1	0	3	0.2672	0.6243	0.1085
114	1.00,0.33,2.00,3.00,1.00,3.00,0.50,0.33,1.00	575990a6b6c59	1.1	0.8823	1	1	1	3	0.2519	0.5889	0.1593
115	1.00,3.00,3.00,0.33,1.00,0.33,0.33,3.00,1.00	575990a55440f	1.4	0.7472	1	1	0	3	0.5736	0.1399	0.2864
116	1.00,4.00,4.00,0.25,1.00,4.00,0.25,0.25,1.00	575990d33e237	1.2	0.6912	1	1	0	3	0.6243	0.2672	0.1085
117	1.00,4.00,3.00,0.25,1.00,0.50,0.33,2.00,1.00	575990b2012ec	1.3	0.9665	1	1	0	3	0.6232	0.1373	0.2395
118	1.00,1.00,0.33,1.00,1.00,0.33,3.00,3.00,1.00	575990aaac58e	1.2	1.0000	1	1	0	3	0.2	0.2	0.6
119	1.00,0.25,0.25,4.00,1.00,4.00,4.00,0.25,1.00	575990c388ede	1.1	0.6912	1	1	0	3	0.1085	0.6243	0.2672
120	1.00,1.00,0.33,1.00,1.00,0.33,3.00,3.00,1.00	575990b2012ec	1.4	1.0000	1	1	0	3	0.2	0.2	0.6
121	1.00,1.00,1.00,1.00,1.00,1.00,1.00,1.00,1.00	5759911da18e6	1.0	1.0000	1	1	0	3	0.3333	0.3333	0.3333
122	1.00,1.00,1.00,1.00,1.00,1.00,1.00,1.00,1.00	575990bd50bba	1.2	1.0000	1	1	0	3	0.3333	0.3333	0.3333
123	1.00,4.00,4.00,0.25,1.00,0.25,0.25,4.00,1.00	575990d33e237	1.3	0.6912	1	1	0	3	0.6243	0.1085	0.2672
124	1.00,0.50,0.33,2.00,1.00,0.50,3.00,2.00,1.00	575990aaac58e	1.3	0.9774	1	1	0	3	0.1638	0.2973	0.539
125	1.00,0.25,4.00,4.00,1.00,4.00,0.25,0.25,1.00	575990d33e237	1.4	0.6912	1	1	0	3	0.2672	0.6243	0.1085
126	1.00,2.00,2.00,0.50,1.00,1.00,0.50,1.00,1.00	575990bd50bba	1.3	1.0000	1	1	0	3	0.5	0.25	0.25
127	1.00,0.25,4.00,4.00,1.00,4.00,0.25,0.25,1.00	575990c388ede	1.2	0.6912	1	1	0	3	0.2672	0.6243	0.1085
128	1.00,0.50,0.50,2.00,1.00,1.00,2.00,1.00,1.00	575990aaac58e	1.4	1.0000	1	1	0	3	0.2	0.4	0.4
129	1.00,1.00,1.00,1.00,1.00,1.00,1.00,1.00,1.00	5759911da18e6	1.1	1.0000	1	1	0	3	0.3333	0.3333	0.3333
130	1.00,0.33,0.50,3.00,1.00,1.00,2.00,1.00,1.00	575990bd50bba	1.4	0.9503	1	1	0	3	0.1698	0.4429	0.3873
131	1.00,4.00,4.00,0.25,1.00,0.25,0.25,4.00,1.00	575990c388ede	1.3	0.6912	1	1	0	3	0.6243	0.1085	0.2672
132	1.00,0.33,0.33,3.00,1.00,2.00,3.00,0.50,1.00	575990a6b6c59	1.2	0.8833	1	1	0	3	0.1416	0.5247	0.3338
133	1.00,4.00,3.00,0.25,1.00,0.25,0.33,4.00,1.00	575990a6b6c59	1.3	0.7890	1	1	0	3	0.594	0.1093	0.2968
134	1.00,0.25,0.25,4.00,1.00,4.00,4.00,0.25,1.00	575990c388ede	1.4	0.6912	1	1	0	3	0.1085	0.6243	0.2672
135	1.00,0.33,4.00,3.00,1.00,4.00,0.25,0.25,1.00	575990a6b6c59	1.4	0.7890	1	1	0	3	0.2968	0.594	0.1093
136	1.00,1.00,1.00,1.00,1.00,1.00,1.00,1.00,1.00	5759911da18e6	1.2	1.0000	1	1	0	3	0.3333	0.3333	0.3333
137	1.00,1.00,1.00,1.00,1.00,1.00,1.00,1.00,1.00	5759911da18e6	1.3	1.0000	1	1	0	3	0.3333	0.3333	0.3333
138	1.00,1.00,1.00,1.00,1.00,1.00,1.00,1.00,1.00	5759911da18e6	1.4	1.0000	1	1	0	3	0.3333	0.3333	0.3333
140	1.00,0.33,0.33,3.00,1.00,0.33,3.00,3.00,1.00	575996c2b7239	1.0	0.7472	1	1	0	3	0.1399	0.2864	0.5736
141	1.00,4.00,4.00,0.25,1.00,3.00,0.25,0.33,1.00	575996c2b7239	1.1	0.7851	1	1	1	3	0.6389	0.2431	0.1181
142	1.00,3.00,4.00,0.33,1.00,0.33,0.25,3.00,1.00	575996c2b7239	1.2	0.6447	1	1	0	3	0.6034	0.1386	0.258
143	1.00,0.33,3.00,3.00,1.00,3.00,0.33,0.33,1.00	575996c2b7239	1.3	0.7472	1	1	0	3	0.2864	0.5736	0.1399
144	1.00,3.00,3.00,0.33,1.00,0.33,0.33,3.00,1.00	575996c2b7239	1.4	0.7472	1	1	0	3	0.5736	0.1399	0.2864
146	1.00,2.00,1.00,0.50,1.00,1.00,1.00,1.00,1.00	575999fa1db6a	1.0	0.6733	1	1	0	3	0.4111	0.2611	0.3278
147	1.00,0.25,0.25,4.00,1.00,1.00,4.00,1.00,1.00	575999fa1db6a	1.1	1.0000	1	1	0	3	0.1111	0.4444	0.4444
148	1.00,2.00,4.00,0.50,1.00,1.00,0.25,1.00,1.00	575999fa1db6a	1.2	0.9004	1	1	0	3	0.5794	0.2341	0.1865
149	1.00,4.00,2.00,0.25,1.00,1.00,0.50,1.00,1.00	575999fa1db6a	1.3	0.9004	1	1	0	3	0.5794	0.1865	0.2341
150	1.00,0.50,2.00,2.00,1.00,3.00,0.50,0.33,1.00	575999fa1db6a	1.4	0.9774	1	1	0	3	0.2973	0.539	0.1638
154	1.00,4.00,4.00,0.25,1.00,0.25,0.25,4.00,1.00	5759aa7e43154	1.0	0.6912	1	1	0	3	0.6243	0.1085	0.2672
156	1.00,3.00,3.00,0.33,1.00,3.00,0.33,0.33,1.00	5759aaaf41d27	1.0	0.7472	1	1	0	3	0.5736	0.2864	0.1399
159	1.00,4.00,4.00,0.25,1.00,4.00,0.25,0.25,1.00	5759aa7e43154	1.1	0.6912	1	1	0	3	0.6243	0.2672	0.1085
160	1.00,3.00,0.33,0.33,1.00,3.00,3.00,0.33,1.00	5759aaaf41d27	1.1	1.0000	1	1	0	3	0.3333	0.3333	0.3333
161	1.00,4.00,0.33,0.25,1.00,0.25,3.00,4.00,1.00	5759aa8cd749a	1.0	0.7890	1	1	0	3	0.2968	0.1093	0.594
163	1.00,4.00,4.00,0.25,1.00,3.00,0.25,0.33,1.00	5759aaaf41d27	1.2	0.7851	1	1	0	3	0.6389	0.2431	0.1181
164	1.00,0.33,0.33,3.00,1.00,0.33,3.00,3.00,1.00	5759aaafb73f1	1.0	0.7472	1	1	0	3	0.1399	0.2864	0.5736
165	1.00,3.00,1.00,0.33,1.00,0.50,1.00,2.00,1.00	5759aa8b928c3	1.0	0.9503	1	1	1	3	0.4429	0.1698	0.3873
167	1.00,0.25,0.25,4.00,1.00,0.25,4.00,4.00,1.00	5759aa7e43154	1.2	0.6912	1	1	0	3	0.1085	0.2672	0.6243
169	1.00,3.00,0.33,0.33,1.00,0.33,3.00,3.00,1.00	5759aaaf41d27	1.3	0.7472	1	1	0	3	0.2864	0.1399	0.5736
171	1.00,3.00,0.33,0.33,1.00,0.33,3.00,3.00,1.00	5759aaafb73f1	1.1	0.7472	1	1	0	3	0.2864	0.1399	0.5736
172	1.00,0.50,2.00,2.00,1.00,2.00,0.50,0.50,1.00	5759aaa718cfc	1.0	0.8227	1	1	1	3	0.3119	0.4905	0.1976
173	1.00,4.00,4.00,0.25,1.00,0.25,0.25,4.00,1.00	5759aa7e43154	1.3	0.6912	1	1	0	3	0.6243	0.1085	0.2672
174	1.00,0.25,4.00,4.00,1.00,4.00,0.25,0.25,1.00	5759aa8cd749a	1.1	0.6912	1	1	0	3	0.2672	0.6243	0.1085
175	1.00,1.00,1.00,1.00,1.00,1.00,1.00,1.00,1.00	5759aa8b928c3	1.1	1.0000	1	1	0	3	0.3333	0.3333	0.3333
176	1.00,2.00,3.00,0.50,1.00,2.00,0.33,0.50,1.00	5759aae814ba9	1.0	0.9774	1	1	0	3	0.539	0.2973	0.1638
178	1.00,0.33,0.33,3.00,1.00,3.00,3.00,0.33,1.00	5759aaaf41d27	1.4	0.7472	1	1	0	3	0.1399	0.5736	0.2864
179	1.00,0.33,3.00,3.00,1.00,3.00,0.33,0.33,1.00	5759aa901b810	1.0	0.7472	1	1	0	3	0.2864	0.5736	0.1399
181	1.00,0.25,0.25,4.00,1.00,0.25,4.00,4.00,1.00	5759aa7e43154	1.4	0.6912	1	1	0	3	0.1085	0.2672	0.6243
183	1.00,0.50,0.33,2.00,1.00,0.33,3.00,3.00,1.00	5759aa8b928c3	1.2	0.8823	1	1	0	3	0.1593	0.2519	0.5889
185	1.00,4.00,0.25,0.25,1.00,0.25,4.00,4.00,1.00	5759aa8cd749a	1.2	0.6912	1	1	0	3	0.2672	0.1085	0.6243
186	1.00,0.33,2.00,3.00,1.00,3.00,0.50,0.33,1.00	5759aaafb73f1	1.2	0.8823	1	1	0	3	0.2519	0.5889	0.1593
187	1.00,3.00,2.00,0.33,1.00,2.00,0.50,0.50,1.00	5759aae814ba9	1.1	0.6831	1	1	0	3	0.5374	0.268	0.1946
188	1.00,2.00,1.00,0.50,1.00,1.00,1.00,1.00,1.00	5759aa901b810	1.1	0.6733	1	1	0	3	0.4111	0.2611	0.3278
189	1.00,4.00,2.00,0.25,1.00,0.33,0.50,3.00,1.00	5759aac5d9357	1.0	0.9667	1	1	0	3	0.5571	0.1226	0.3202
190	1.00,2.00,2.00,0.50,1.00,2.00,0.50,0.50,1.00	5759aad5b86e7	1.0	0.8227	1	1	0	3	0.4905	0.3119	0.1976
191	1.00,0.33,0.33,3.00,1.00,0.33,3.00,3.00,1.00	5759aac2b6fa8	1.0	0.7472	1	1	0	3	0.1399	0.2864	0.5736
192	1.00,4.00,4.00,0.25,1.00,4.00,0.25,0.25,1.00	5759aa8cd749a	1.3	0.6912	1	1	0	3	0.6243	0.2672	0.1085
193	1.00,0.33,0.33,3.00,1.00,2.00,3.00,0.50,1.00	5759aaafb73f1	1.3	0.8833	1	1	0	3	0.1416	0.5247	0.3338
194	1.00,3.00,0.50,0.33,1.00,0.33,2.00,3.00,1.00	5759aa8b928c3	1.3	0.8833	1	1	0	3	0.3338	0.1416	0.5247
195	1.00,0.25,0.25,4.00,1.00,0.33,4.00,3.00,1.00	5759ab5647ce4	1.0	0.7890	1	1	0	3	0.1093	0.2968	0.594
196	1.00,1.00,1.00,1.00,1.00,1.00,1.00,1.00,1.00	5759aae814ba9	1.2	1.0000	1	1	0	3	0.3333	0.3333	0.3333
197	1.00,1.00,1.00,1.00,1.00,1.00,1.00,1.00,1.00	5759aac5d9357	1.1	1.0000	1	1	0	3	0.3333	0.3333	0.3333
198	1.00,2.00,0.50,0.50,1.00,0.50,2.00,2.00,1.00	5759aa92d6635	1.0	0.8227	1	1	0	3	0.3119	0.1976	0.4905
199	1.00,1.00,0.50,1.00,1.00,0.50,2.00,2.00,1.00	5759aa8b928c3	1.4	1.0000	1	1	0	3	0.25	0.25	0.5
200	1.00,2.00,3.00,0.50,1.00,3.00,0.33,0.33,1.00	5759aa901b810	1.2	0.8833	1	1	0	3	0.5247	0.3338	0.1416
201	1.00,2.00,2.00,0.50,1.00,2.00,0.50,0.50,1.00	5759aad5b86e7	1.1	0.8227	1	1	0	3	0.4905	0.3119	0.1976
202	1.00,0.25,4.00,4.00,1.00,4.00,0.25,0.25,1.00	5759aa8cd749a	1.4	0.6912	1	1	0	3	0.2672	0.6243	0.1085
203	1.00,0.25,0.33,4.00,1.00,1.00,3.00,1.00,1.00	5759ab5647ce4	1.1	0.9808	1	1	0	3	0.1263	0.4577	0.416
204	1.00,2.00,1.00,0.50,1.00,1.00,1.00,1.00,1.00	5759aae814ba9	1.3	0.6733	1	1	0	3	0.4111	0.2611	0.3278
205	1.00,3.00,0.50,0.33,1.00,0.50,2.00,2.00,1.00	5759aac2b6fa8	1.1	0.6857	1	1	1	3	0.35	0.1722	0.4778
206	1.00,1.00,2.00,1.00,1.00,2.00,0.50,0.50,1.00	5759aac5d9357	1.2	1.0000	1	1	0	3	0.4	0.4	0.2
207	1.00,0.50,2.00,2.00,1.00,0.50,0.50,2.00,1.00	5759aa9137d69	1.0	1.0000	1	1	0	3	0.3333	0.3333	0.3333
208	1.00,0.50,2.00,2.00,1.00,0.50,0.50,2.00,1.00	5759ab5647ce4	1.2	1.0000	1	1	0	3	0.3333	0.3333	0.3333
209	1.00,0.50,1.00,2.00,1.00,1.00,1.00,1.00,1.00	5759aae814ba9	1.4	0.6733	1	1	0	3	0.2611	0.4111	0.3278
210	1.00,0.25,0.33,4.00,1.00,4.00,3.00,0.25,1.00	5759aaa718cfc	1.1	0.7851	1	1	0	3	0.1181	0.6389	0.2431
211	1.00,2.00,2.00,0.50,1.00,3.00,0.50,0.33,1.00	5759aa92d6635	1.1	0.6857	1	1	0	3	0.4778	0.35	0.1722
212	1.00,0.33,0.33,3.00,1.00,2.00,3.00,0.50,1.00	5759aac2b6fa8	1.2	0.8833	1	1	0	3	0.1416	0.5247	0.3338
214	1.00,1.00,0.33,1.00,1.00,0.33,3.00,3.00,1.00	5759aaafb73f1	1.4	1.0000	1	1	0	3	0.2	0.2	0.6
215	1.00,2.00,2.00,0.50,1.00,0.50,0.50,2.00,1.00	5759aad5b86e7	1.2	0.8227	1	1	0	3	0.4905	0.1976	0.3119
216	1.00,2.00,2.00,0.50,1.00,0.50,0.50,2.00,1.00	5759ab5647ce4	1.3	0.8227	1	1	0	3	0.4905	0.1976	0.3119
217	1.00,3.00,3.00,0.33,1.00,1.00,0.33,1.00,1.00	5759aac5d9357	1.3	1.0000	1	1	0	3	0.6	0.2	0.2
218	1.00,0.33,3.00,3.00,1.00,3.00,0.33,0.33,1.00	5759aa92d6635	1.2	0.7472	1	1	0	3	0.2864	0.5736	0.1399
219	1.00,1.00,2.00,1.00,1.00,2.00,0.50,0.50,1.00	5759aad5b86e7	1.3	1.0000	1	1	0	3	0.4	0.4	0.2
220	1.00,1.00,3.00,1.00,1.00,3.00,0.33,0.33,1.00	5759aaa718cfc	1.2	1.0000	1	1	0	3	0.4286	0.4286	0.1429
221	1.00,3.00,0.50,0.33,1.00,0.33,2.00,3.00,1.00	5759aa9137d69	1.1	0.8833	1	1	0	3	0.3338	0.1416	0.5247
222	1.00,3.00,3.00,0.33,1.00,0.50,0.33,2.00,1.00	5759aac5d9357	1.4	0.8823	1	1	0	3	0.5889	0.1593	0.2519
223	1.00,3.00,3.00,0.33,1.00,0.33,0.33,3.00,1.00	5759aac2b6fa8	1.3	0.7472	1	1	0	3	0.5736	0.1399	0.2864
224	1.00,2.00,2.00,0.50,1.00,0.50,0.50,2.00,1.00	5759ab5647ce4	1.4	0.8227	1	1	0	3	0.4905	0.1976	0.3119
225	1.00,1.00,0.50,1.00,1.00,0.50,2.00,2.00,1.00	5759aa901b810	1.3	1.0000	1	1	1	3	0.25	0.25	0.5
226	1.00,2.00,0.50,0.50,1.00,0.50,2.00,2.00,1.00	5759ab7b23973	1.0	0.8227	1	1	0	3	0.3119	0.1976	0.4905
228	1.00,1.00,2.00,1.00,1.00,2.00,0.50,0.50,1.00	5759aad5b86e7	1.4	1.0000	1	1	0	3	0.4	0.4	0.2
229	1.00,2.00,3.00,0.50,1.00,3.00,0.33,0.33,1.00	5759aac2b6fa8	1.4	0.8833	1	1	0	3	0.5247	0.3338	0.1416
230	1.00,0.50,0.33,2.00,1.00,0.50,3.00,2.00,1.00	5759aaa718cfc	1.3	0.9774	1	1	0	3	0.1638	0.2973	0.539
231	1.00,0.33,0.33,3.00,1.00,1.00,3.00,1.00,1.00	5759aa901b810	1.4	1.0000	1	1	0	3	0.1429	0.4286	0.4286
232	1.00,2.00,0.33,0.50,1.00,0.50,3.00,2.00,1.00	5759aa9137d69	1.2	0.6831	1	1	0	3	0.268	0.1946	0.5374
233	1.00,1.00,0.50,1.00,1.00,0.33,2.00,3.00,1.00	5759aaa718cfc	1.4	0.9504	1	1	0	3	0.2409	0.2106	0.5485
234	1.00,0.33,1.00,3.00,1.00,0.50,1.00,2.00,1.00	5759ab7b23973	1.1	0.3327	0	1	1	3	0.2333	0.3667	0.4
235	1.00,3.00,3.00,0.33,1.00,4.00,0.33,0.25,1.00	5759aa92d6635	1.3	0.6510	1	1	0	3	0.5603	0.3118	0.1279
237	1.00,3.00,0.50,0.33,1.00,0.50,2.00,2.00,1.00	5759aa9137d69	1.3	0.6857	1	1	0	3	0.35	0.1722	0.4778
239	1.00,3.00,1.00,0.33,1.00,1.00,1.00,1.00,1.00	5759aae6d3a78	1.0	0.6844	1	1	0	3	0.454	0.2254	0.3206
240	1.00,0.50,0.33,2.00,1.00,0.33,3.00,3.00,1.00	5759ab7b23973	1.2	0.8823	1	1	0	3	0.1593	0.2519	0.5889
241	1.00,1.00,1.00,1.00,1.00,0.33,1.00,3.00,1.00	5759aa92d6635	1.4	0.6844	1	1	0	3	0.3206	0.2254	0.454
243	1.00,0.33,1.00,3.00,1.00,1.00,1.00,1.00,1.00	5759aae6d3a78	1.1	0.6844	1	1	0	3	0.2254	0.454	0.3206
244	1.00,0.50,3.00,2.00,1.00,2.00,0.33,0.50,1.00	5759aa9137d69	1.4	0.6857	1	1	0	3	0.35	0.4778	0.1722
245	1.00,2.00,0.33,0.50,1.00,0.33,3.00,3.00,1.00	5759ab7b23973	1.3	0.8823	1	1	0	3	0.2519	0.1593	0.5889
248	1.00,3.00,3.00,0.33,1.00,1.00,0.33,1.00,1.00	5759ab7b23973	1.4	1.0000	1	1	0	3	0.6	0.2	0.2
249	1.00,1.00,1.00,1.00,1.00,1.00,1.00,1.00,1.00	5759aae6d3a78	1.2	1.0000	1	1	0	3	0.3333	0.3333	0.3333
250	1.00,3.00,1.00,0.33,1.00,2.00,1.00,0.50,1.00	5759aae8da8cb	1.0	0.3311	0	1	1	3	0.4484	0.2884	0.2632
252	1.00,3.00,1.00,0.33,1.00,3.00,1.00,0.33,1.00	5759aaf119c56	1.0	0.2492	0	1	1	3	0.4403	0.3245	0.2352
253	1.00,1.00,1.00,1.00,1.00,1.00,1.00,1.00,1.00	5759aae6d3a78	1.3	1.0000	1	1	0	3	0.3333	0.3333	0.3333
254	1.00,1.00,1.00,1.00,1.00,1.00,1.00,1.00,1.00	5759aae6d3a78	1.4	1.0000	1	1	0	3	0.3333	0.3333	0.3333
255	1.00,1.00,1.00,1.00,1.00,1.00,1.00,1.00,1.00	5759aae8da8cb	1.1	1.0000	1	1	0	3	0.3333	0.3333	0.3333
256	1.00,3.00,1.00,0.33,1.00,0.50,1.00,2.00,1.00	5759aae02b60d	1.0	0.9503	1	1	0	3	0.4429	0.1698	0.3873
257	1.00,2.00,0.50,0.50,1.00,0.50,2.00,2.00,1.00	5759aa9639222	1.0	0.8227	1	1	0	3	0.3119	0.1976	0.4905
258	1.00,3.00,2.00,0.33,1.00,1.00,0.50,1.00,1.00	5759aae8da8cb	1.2	0.9504	1	1	0	3	0.5485	0.2106	0.2409
259	1.00,0.50,1.00,2.00,1.00,3.00,1.00,0.33,1.00	5759aaf119c56	1.1	0.9504	1	1	0	3	0.2409	0.5485	0.2106
260	1.00,4.00,1.00,0.25,1.00,0.50,1.00,2.00,1.00	5759aaca739c9	1.0	0.8999	1	1	0	3	0.472	0.1513	0.3767
261	1.00,1.00,1.00,1.00,1.00,1.00,1.00,1.00,1.00	5759ab275fd2f	1.0	1.0000	1	1	0	3	0.3333	0.3333	0.3333
263	1.00,3.00,3.00,0.33,1.00,0.50,0.33,2.00,1.00	5759aa9639222	1.1	0.8823	1	1	0	3	0.5889	0.1593	0.2519
264	1.00,3.00,3.00,0.33,1.00,1.00,0.33,1.00,1.00	5759aae8da8cb	1.3	1.0000	1	1	0	3	0.6	0.2	0.2
266	1.00,1.00,1.00,1.00,1.00,1.00,1.00,1.00,1.00	5759aadf01cb3	1.0	1.0000	1	1	0	3	0.3333	0.3333	0.3333
268	1.00,1.00,1.00,1.00,1.00,3.00,1.00,0.33,1.00	5759aaf119c56	1.2	0.6844	1	1	1	3	0.3206	0.454	0.2254
269	1.00,1.00,1.00,1.00,1.00,1.00,1.00,1.00,1.00	5759ab275fd2f	1.1	1.0000	1	1	0	3	0.3333	0.3333	0.3333
270	1.00,0.25,0.33,4.00,1.00,1.00,3.00,1.00,1.00	5759aadf01cb3	1.1	0.9808	1	1	0	3	0.1263	0.4577	0.416
271	1.00,3.00,1.00,0.33,1.00,1.00,1.00,1.00,1.00	5759aaf119c56	1.3	0.6844	1	1	0	3	0.454	0.2254	0.3206
272	1.00,0.50,0.50,2.00,1.00,0.50,2.00,2.00,1.00	5759aa9639222	1.2	0.8227	1	1	0	3	0.1976	0.3119	0.4905
273	1.00,2.00,2.00,0.50,1.00,1.00,0.50,1.00,1.00	5759aae8da8cb	1.4	1.0000	1	1	0	3	0.5	0.25	0.25
274	1.00,1.00,1.00,1.00,1.00,2.00,1.00,0.50,1.00	5759aaca739c9	1.1	0.6733	1	1	0	3	0.3278	0.4111	0.2611
276	1.00,3.00,3.00,0.33,1.00,0.33,0.33,3.00,1.00	5759ac0419e99	1.0	0.7472	1	1	0	3	0.5736	0.1399	0.2864
277	1.00,1.00,1.00,1.00,1.00,1.00,1.00,1.00,1.00	5759aaf119c56	1.4	1.0000	1	1	0	3	0.3333	0.3333	0.3333
278	1.00,1.00,1.00,1.00,1.00,0.33,1.00,3.00,1.00	5759aadf01cb3	1.2	0.6844	1	1	0	3	0.3206	0.2254	0.454
280	1.00,1.00,0.33,1.00,1.00,1.00,3.00,1.00,1.00	5759ab2ec3095	1.0	0.6844	1	1	0	3	0.2254	0.3206	0.454
281	1.00,1.00,1.00,1.00,1.00,1.00,1.00,1.00,1.00	5759aae02b60d	1.1	1.0000	1	1	0	3	0.3333	0.3333	0.3333
282	1.00,3.00,4.00,0.33,1.00,1.00,0.25,1.00,1.00	5759aadf01cb3	1.3	0.9808	1	1	0	3	0.6327	0.1924	0.1749
283	1.00,0.33,0.33,3.00,1.00,0.50,3.00,2.00,1.00	5759ac0419e99	1.1	0.8833	1	1	0	3	0.1416	0.3338	0.5247
284	1.00,2.00,2.00,0.50,1.00,2.00,0.50,0.50,1.00	5759aa9639222	1.3	0.8227	1	1	0	3	0.4905	0.3119	0.1976
285	1.00,1.00,1.00,1.00,1.00,2.00,1.00,0.50,1.00	5759aaca739c9	1.2	0.6733	1	1	0	3	0.3278	0.4111	0.2611
286	1.00,2.00,2.00,0.50,1.00,1.00,0.50,1.00,1.00	5759aae02b60d	1.2	1.0000	1	1	1	3	0.5	0.25	0.25
287	1.00,3.00,0.25,0.33,1.00,0.25,4.00,4.00,1.00	5759ac0419e99	1.2	0.7851	1	1	0	3	0.2431	0.1181	0.6389
288	1.00,2.00,1.00,0.50,1.00,1.00,1.00,1.00,1.00	5759aaa0ddafa	1.0	0.6733	1	1	0	3	0.4111	0.2611	0.3278
289	1.00,1.00,2.00,1.00,1.00,2.00,0.50,0.50,1.00	5759ab2ec3095	1.1	1.0000	1	1	0	3	0.4	0.4	0.2
290	1.00,3.00,1.00,0.33,1.00,0.33,1.00,3.00,1.00	5759aadf01cb3	1.4	1.0000	1	1	1	3	0.4286	0.1429	0.4286
291	1.00,0.25,1.00,4.00,1.00,1.00,1.00,1.00,1.00	5759ab275fd2f	1.2	0.6951	1	1	0	3	0.2037	0.4815	0.3148
292	1.00,1.00,0.50,1.00,1.00,0.50,2.00,2.00,1.00	5759aa9639222	1.4	1.0000	1	1	1	3	0.25	0.25	0.5
293	1.00,4.00,0.50,0.25,1.00,0.33,2.00,3.00,1.00	5759ac0419e99	1.3	0.7969	1	1	0	3	0.3601	0.1279	0.5119
294	1.00,0.33,0.50,3.00,1.00,2.00,2.00,0.50,1.00	5759aaa0ddafa	1.1	0.9774	1	1	0	3	0.1638	0.539	0.2973
295	1.00,1.00,0.33,1.00,1.00,0.33,3.00,3.00,1.00	5759aaae53667	1.0	1.0000	1	1	0	3	0.2	0.2	0.6
296	1.00,1.00,1.00,1.00,1.00,2.00,1.00,0.50,1.00	5759aae02b60d	1.3	0.6733	1	1	0	3	0.3278	0.4111	0.2611
298	1.00,0.50,0.33,2.00,1.00,0.33,3.00,3.00,1.00	5759ac0419e99	1.4	0.8823	1	1	0	3	0.1593	0.2519	0.5889
299	1.00,2.00,2.00,0.50,1.00,0.50,0.50,2.00,1.00	5759aaca739c9	1.3	0.8227	1	1	0	3	0.4905	0.1976	0.3119
300	1.00,1.00,1.00,1.00,1.00,1.00,1.00,1.00,1.00	5759aae02b60d	1.4	1.0000	1	1	0	3	0.3333	0.3333	0.3333
301	1.00,2.00,1.00,0.50,1.00,1.00,1.00,1.00,1.00	5759ab2ec3095	1.2	0.6733	1	1	0	3	0.4111	0.2611	0.3278
302	1.00,1.00,1.00,1.00,1.00,1.00,1.00,1.00,1.00	5759ab275fd2f	1.3	1.0000	1	1	0	3	0.3333	0.3333	0.3333
303	1.00,3.00,2.00,0.33,1.00,0.50,0.50,2.00,1.00	5759aaa0ddafa	1.2	0.9774	1	1	0	3	0.539	0.1638	0.2973
304	1.00,0.33,0.25,3.00,1.00,3.00,4.00,0.33,1.00	5759aaae53667	1.1	0.6510	1	1	0	3	0.1279	0.5603	0.3118
305	1.00,1.00,0.50,1.00,1.00,1.00,2.00,1.00,1.00	5759ab3119eab	1.0	0.6733	1	1	0	3	0.2611	0.3278	0.4111
306	1.00,1.00,0.50,1.00,1.00,1.00,2.00,1.00,1.00	5759aaca739c9	1.4	0.6733	1	1	1	3	0.2611	0.3278	0.4111
307	1.00,1.00,1.00,1.00,1.00,1.00,1.00,1.00,1.00	5759ab275fd2f	1.4	1.0000	1	1	0	3	0.3333	0.3333	0.3333
308	1.00,0.33,0.33,3.00,1.00,0.33,3.00,3.00,1.00	5759aaae53667	1.2	0.7472	1	1	0	3	0.1399	0.2864	0.5736
309	1.00,3.00,0.50,0.33,1.00,0.33,2.00,3.00,1.00	5759aaa0ddafa	1.3	0.8833	1	1	0	3	0.3338	0.1416	0.5247
310	1.00,1.00,1.00,1.00,1.00,0.50,1.00,2.00,1.00	5759ab2ec3095	1.3	0.6733	1	1	1	3	0.3278	0.2611	0.4111
311	1.00,3.00,3.00,0.33,1.00,1.00,0.33,1.00,1.00	5759ab3119eab	1.1	1.0000	1	1	0	3	0.6	0.2	0.2
312	1.00,3.00,3.00,0.33,1.00,2.00,0.33,0.50,1.00	5759aaa0ddafa	1.4	0.8823	1	1	0	3	0.5889	0.2519	0.1593
313	1.00,0.33,0.33,3.00,1.00,2.00,3.00,0.50,1.00	5759aaae53667	1.3	0.8833	1	1	0	3	0.1416	0.5247	0.3338
314	1.00,1.00,0.33,1.00,1.00,0.50,3.00,2.00,1.00	5759ab2ec3095	1.4	0.9504	1	1	0	3	0.2106	0.2409	0.5485
315	1.00,3.00,1.00,0.33,1.00,0.33,1.00,3.00,1.00	5759ab3119eab	1.2	1.0000	1	1	0	3	0.4286	0.1429	0.4286
316	1.00,3.00,3.00,0.33,1.00,0.33,0.33,3.00,1.00	5759aaae53667	1.4	0.7472	1	1	1	3	0.5736	0.1399	0.2864
317	1.00,1.00,1.00,1.00,1.00,3.00,1.00,0.33,1.00	5759ab3119eab	1.3	0.6844	1	1	0	3	0.3206	0.454	0.2254
318	1.00,1.00,0.33,1.00,1.00,0.33,3.00,3.00,1.00	5759ab3119eab	1.4	1.0000	1	1	0	3	0.2	0.2	0.6

## Sheet: MATRIZ_informatico_alterada
PROJETOS-ÂNCORA	ÁREAS DE INTERVENÇÃO & OBJETIVOS ESTRATÉGICOS
	Tecido económico e competitividade			Ambiente e recursos naturais			Território e centralidade			Condições de suporte social			Ação cívica e cooperação institucional					este quadro não corresponde ao original. Foi alterado para comparar os mcdm
	1.1. Apoiar e apostar em novos investimentos	1.2. Adequar a mão-de-obra às atividades económicas	1.3. Assegurar infraestruturas, serviços e outros apoios às empresas	5.1. Preservação ambiental	5.2. Extrair valor dos recursos naturais para o turismo	5.3. Valorizar os recursos naturais para uso dos residentes	2.1. Qualificar o património construído	2.3. Qualificar o espaço público	2.4. Promover a acessibilidade e a conetividade	3.1. Saúde e educação	3.2. Apoio a grupos vulneráveis	Promover a inserção profissional	4.2. Desporto e lazer	4.3. Cultura	4.4. Educação e Participação cívica
Radar de oportunidades	18	9	10	1	6	5	3	3	3	4	2	5	3	3	9	84	34.6667
1. Competências e ferramentas necessárias para responder às exigências do tecido económico e social	6	2	4	0	2	1	1	1	1	1	0	1	1	1	1	23	40	17
Impacto	2	1	2		1	1	1	1	1	1		1	1	1	1	15	18	3
Intensidade	3	2	2		2	1	1	1	1	1		1	1	1	1	18	32	14
2. Qualificar as áreas de intervenção e a rede de parceiros; promover investimentos com potencial de afirmação do Município	6	4	4	1	2	2	1	1	2	2	1	2	1	1	4	34	38	4
Impacto	2	2	2	1	1	1	1	1	1	1	1	1	1	1	2	19	17	-2
Intensidade	3	2	2	1	2	2	1	1	2	2	1	2	1	1	2	25	29	4
3. Reunir valências para a execução dos projetos de apoio ao tecido económico e social (espaço contacto e sessões de esclarecimento)	6	3	2	0	2	2	1	1	0	1	1	2	1	1	4	27	26	-1
Impacto	2	1	1		1	1	1	1		1	1	1	1	1	2	15	16	1
Intensidade	3	3	2		2	2	1	1		1	1	2	1	1	2	22	17	-5
Plano de gestão florestal	19	3	6	20	10	10	1	4	4	5	2	3	3	3	16	109	23
1. Estratégia de concertação para atuar sobre a floresta	6	2	2	6	2	6	0	1	1	2	1	1	1	1	6	38	38	0
Impacto	2	1	1	2	2	2		1	1	1	1	1	1	1	2	19	16	-3
Intensidade	3	2	2	3	1	3		1	1	2	1	1	1	1	3	25	22	-3
2. Adequar os instrumentos de gestão territorial e definir os princípios, os critérios e os indicadores para uma gestão florestal	6	0	2	6	2	2	1	1	2	0	0	0	0	0	4	26	29	3
Impacto	2		1	2	2	2	1	1	2						2	15	17	2
Intensidade	3		2	3	1	1	1	1	1						2	15	16	1
3. Desenvolver, implementar e promover a participação em iniciativas locais	1	0	0	6	2	0	0	0	0	1	0	1	1	1	4	17	18	1
Impacto	1			2	2					1		1	1	1	2	11	10	-1
Intensidade	1			3	1					1		1	1	1	2	11	11	0
4. Apostar em medidas de valorização dos produtos, subprodutos, produções e espaços florestais	6	1	2	2	4	2	0	2	1	2	1	1	1	1	2	28	19	-9	-14.5556
Impacto	2	1	1	1	2	2		1	1	2	1	1	1	1	2	19	12	-7
Intensidade	3	1	2	2	2	1		2	1	1	1	1	1	1	1	20	13	-7
Dinamização das atividades económicas	18	10	16	1	12	4	1	2	6	2	0	5	2	2	3	84	20.6667	-63.3333
1. Afirmar o perfil de especialização das atividades económicas	6	6	6	1	4	1	0	1	1	1	0	1	1	1	1	31	24	-7
Impacto	2	2	2	1	2	1		1	1	1		1	1	1	1	17	11	-6
Intensidade	3	3	3	1	2	1		1	1	1		1	1	1	1	20	16	-4
2. Criar condições para a captação de investimento e reconhecimento de oportunidades de emprego no Município	6	2	6	0	2	1	1	1	4	1	0	2	1	1	1	29	22	-7
Impacto	2	1	2		1	1	1	1	2	1		1	1	1	1	16	11	-5
Intensidade	3	2	3		2	1	1	1	2	1		2	1	1	1	21	14	-7
3. Apostar na valorização das condições de contexto do território municipal e regional	6	2	4	0	6	2	0	0	1	0	0	2	0	0	1	24	16	-8
Impacto	2	1	2		2	2			1			1			1	12	10	-2
Intensidade	3	2	2		3	1			1			2			1	15	12	-3
Gestão de competências (capital humano)	8	14	7	1	8	0	0	0	1	8	2	11	2	3	9	74	25.6667	-48.3333
1. Identificar as necessidades técnico-profissionais (formação e conhecimento especializado)	3	6	2	0	2	0	0	0	0	2	1	4	1	1	1	23	28	5
Impacto	1	2	1		1					2	1	2	1	1	1	13	12	-1
Intensidade	3	3	2		2					1	1	2	1	1	1	17	17	0
2. Plano integrado de gestão de competências para valorização contínua dos recursos humanos	3	6	4	0	4	0	0	0	1	4	1	6	1	1	2	33	25	-8
Impacto	1	2	2		2				1	2	1	2	1	1	2	17	10	-7
Intensidade	3	3	2		2				1	2	1	3	1	1	1	20	16	-4
3. Reforçar as ligações e a rede de parceiros institucionais (empresariais, industriais, espaços de incubação e Unidades de I&D)	2	2	1	1	2	0	0	0	0	2	0	1	0	1	6	18	24	6
Impacto	1	2	1	1	1					1		1		1	2	11	11	0
Intensidade	2	1	1	1	2					2		1		1	3	14	14	0
Regeneração urbana e Mobilidade	10	1	3	2	6	4	14	22	11	6	6	1	7	13	8	114	14.1667	-99.8333
3. Reabilitação do património construído e reabilitação funcional	4	0	1	0	1	1	6	6	4	0	2	0	0	0	0	25	7	-18
Impacto	2		1		1	1	2	2	2		2					13	5	-8
Intensidade	2		1		1	1	3	3	2		1					14	4	-10
4. Afirmar os valores patrimoniais e simbólicos	2	0	0	1	2	1	6	6	0	2	0	0	2	6	1	29	15	-14
Impacto	2			1	1	1	2	2		1			2	2	1	15	8	-7
Intensidade	1			1	2	1	3	3		2			1	3	1	18	9	-9
5. Promover a acessibilidade e desenvolver medidas de gestão da mobilidade	2	0	2	0	2	1	2	4	6	4	4	1	1	1	1	31	19	-12
Impacto	2		2		1	1	1	2	2	2	2	1	1	1	1	19	12	-7
Intensidade	1		1		2	1	2	2	3	2	2	1	1	1	1	20	14	-6
6. Organizar ações de animação e valorização dos espaços públicos	2	1	0	1	1	1	0	6	1	0	0	0	4	6	6	29	22	-7
Impacto	1	1		1	1	1		2	1				2	2	2	14	14	0
Intensidade	2	1		1	1	1		3	1				2	3	3	18	14	-4
Consolidação e requalificação da rede de equipamentos e serviços coletivos	6	6	4	0	2	1	5	1	4	13	12	6	10	6	6	82	25	-57	5.46667
1. Desenvolver e atualizar estudos demográficos prospetivos	2	2	2	0	2	0	1	0	0	3	2	1	2	2	0	19	17	-2
Impacto	1	1	1		1		1			1	1	1	1	1		10	12	2
Intensidade	2	2	2		2		1			3	2	1	2	2		19	14	-5
2. Identificar as respostas atualmente existentes e avaliar a sua adequação face às necessidades socioeconómicas de médio e longo prazo	2	4	2	0	0	1	4	1	2	6	6	1	6	2	2	39	38	-1
Impacto	2	2	2			1	2	1	2	2	2	1	2	2	2	23	21	-2
Intensidade	1	2	1			1	2	1	1	3	3	1	3	1	1	21	22	1
3. Apoiar a articulação interinstitucional e a mobilização da comunidade (novas lógicas de organização)	2	0	0	0	0	0	0	0	2	4	4	4	2	2	4	24	20	-4
Impacto	2								2	2	2	2	2	2	2	16	10	-6
Intensidade	1								1	2	2	2	1	1	2	12	13	1
Estratégia de comunicação e marketing	19	4	6	6	13	6	4	4	3	6	1	1	21	21	18	133	29.2	-103.8	8.86667
1. Consolidar as parcerias institucionais e territoriais	2	1	1	0	2	1	0	0	0	1	0	0	3	3	4	18	19	1
Impacto	1	1	1		1	1				1			1	1	2	10	13	3
Intensidade	2	1	1		2	1				1			3	3	2	16	10	-6
2. Melhorar os mecanismos de comunicação e interação dos agentes locais	3	0	1	0	1	1	0	0	0	1	1	0	4	4	4	20	21	1
Impacto	1		1		1	1				1	1		2	2	2	12	8	-4
Intensidade	3		1		1	1				1	1		2	2	2	14	12	-2
3. Desenvolver uma campanha de divulgação da marca e destino Sertã	4	1	2	4	4	2	1	2	0	2	0	0	6	6	2	36	51	15
Impacto	2	1	1	2	2	2	1	1		2			2	2	2	20	23	3
Intensidade	2	1	2	2	2	1	1	2		1			3	3	1	21	32	11
4. Desenvolver e promover produtos turísticos de qualidade nacional e internacional	6	2	2	2	6	2	3	2	3	2	0	1	4	4	2	41	36	-5
Impacto	2	1	1	1	2	1	1	1	1	1		1	2	2	1	18	18	0
Intensidade	3	2	2	2	3	2	3	2	3	2		1	2	2	2	31	19	-12
5. Apoiar na programação integrada e na estratégia de comunicação	4	0	0	0	0	0	0	0	0	0	0	0	4	4	6	18	19	1
Impacto	2												2	2	2	8	7	-1
Intensidade	2												2	2	3	9	16	7
	98	47	52	31	57	30	28	36	32	44	25	32	48	51	69			0
cópia da tabela anterior
Radar de oportunidades	18	9	10	1	6	5	3	3	3	4	2	5	3	3	9
Plano de gestão florestal	19	3	6	20	10	10	1	4	4	5	2	3	3	3	16
Dinamização das atividades económicas	18	10	16	1	12	4	1	2	6	2		5	2	2	3
Gestão de competências (capital humano)	8	14	7	1	8				1	8	2	11	2	3	9
Regeneração urbana e Mobilidade	10	1	3	2	6	4	14	22	11	6	6	1	7	13	8
Consolidação e requalificação da rede de equipamentos e serviços coletivos	6	6	4		2	1	5	1	4	13	12	6	10	6	6
Estratégia de comunicação e marketing	19	4	6	6	13	6	4	4	3	6	1	1	21	21	18
																			ordenação
																			geomean normalizado		index	rank
																		Radar de oportunidades	4.66291	8.43444	61.8779	7
																		Plano de gestão florestal	6.10309	11.0395	80.9894	2
TESTE AGREGAÇÃO																		Dinamização das atividades económicas	4.73692	8.56832	62.8601	5
NIVEL I																		Gestão de competências (capital humano)	5.60432	10.1373	74.3706	3
																		Regeneração urbana e Mobilidade	5.38865	9.74718	71.5086	4
geomean normalizado	0.236612			0.198365			0.135546			0.253554			0.175923					Consolidação e requalificação da rede de equipamentos e serviços coletivos	4.66737	8.4425	61.937	6
																		Estratégia de comunicação e marketing	7.53566	13.6308	100	1
TESTE AGREGAÇÃO																			5.52842	10
NIVEL II
geomean normalizado	0.374792	0.268772	0.356436	0.305656	0.398438	0.295906	0.338605	0.320804	0.340592	0.438992	0.239826	0.321182	0.3064	0.35418	0.339419
																						racio rate for geomean
multiplicar pelo racio de distribuição
Radar de oportunidades	15.9584	7.97918	8.86575	0.886575	5.31945	4.43288	2.65973	2.65973	2.65973	3.5463	1.77315	4.43288	2.65973	2.65973	7.97918			P1	15.3257			4.86072	0.886575
Plano de gestão florestal	17.6219	2.78241	5.56482	18.5494	9.2747	9.2747	0.92747	3.70988	3.70988	4.63735	1.85494	2.78241	2.78241	2.78241	14.8395			P2	19.0225			4.6464	0.92747
Dinamização das atividades económicas	18.3291	10.1829	16.2926	1.01829	12.2194	4.07314	1.01829	2.03657	6.10971	2.03657		5.09143	2.03657	2.03657	3.05486			P3	13.3424			4.23201	1.01829
Gestão de competências (capital humano)	10.9051	19.0839	9.54197	1.36314	10.9051				1.36314	10.9051	2.72628	14.9945	2.72628	4.08942	12.2682			P4	11.8085			3.16138	1.36314
Regeneração urbana e Mobilidade	8.80592	0.880592	2.64178	1.76118	5.28355	3.52237	12.3283	19.373	9.68651	5.28355	5.28355	0.880592	6.16414	11.4477	7.04473			P5	17.7394			4.89375	0.880592
Consolidação e requalificação da rede de equipamentos e serviços coletivos	6.11905	6.11905	4.07936		2.03968	1.01984	5.09921	1.01984	4.07936	13.2579	12.2381	6.11905	10.1984	6.11905	6.11905			P6	13.4711			4.22556	1.01984
Estratégia de comunicação e marketing	19.749	4.15769	6.23653	6.23653	13.5125	6.23653	4.15769	4.15769	3.11827	6.23653	1.03942	1.03942	21.8279	21.8279	18.7096			P7	20.2432			4.14595	1.03942
																			15.8504			4.3094
TESTE GEOMEAN (NIVEL II) / normalizado
multiplicar pelo peso nivel II
Radar de oportunidades	5.98106	2.14458	3.16008	0.270987	2.11947	1.31172	0.900595	0.853251	0.90588	1.5568	0.425248	1.42376	0.814941	0.942022	2.70829
Plano de gestão florestal	6.60455	0.747833	1.9835	5.66973	3.69539	2.74444	0.314045	1.19014	1.26355	2.03576	0.444863	0.893659	0.852531	0.985474	5.03682
Dinamização das atividades económicas	6.86961	2.73687	5.80726	0.311245	4.86868	1.20527	0.344796	0.65334	2.08092	0.894038		1.63527	0.624006	0.721313	1.03688
Gestão de competências (capital humano)	4.08714	5.12923	3.40111	0.416652	4.34501				0.464273	4.78726	0.653833	4.81597	0.835333	1.44839	4.16408
Regeneração urbana e Mobilidade	3.30038	0.236678	0.941625	0.538316	2.10517	1.04229	4.17441	6.21494	3.29914	2.31944	1.26713	0.28283	1.8887	4.05455	2.39112
Consolidação e requalificação da rede de equipamentos e serviços coletivos	2.29337	1.64463	1.45403		0.812686	0.301777	1.72661	0.327169	1.3894	5.82013	2.93501	1.96533	3.1248	2.16724	2.07692
Estratégia de comunicação e marketing	7.40177	1.11747	2.22293	1.90623	5.38388	1.84543	1.40781	1.3338	1.06206	2.73779	0.249281	0.333843	6.68807	7.731	6.3504
																		Regeneração urbana e Mobilidade	72.1138			1
																		Estratégia de comunicação e marketing	80.677			2
																		Plano de gestão florestal	81.6748			3
																		Radar de oportunidades	83.2021			4
																		Rede de equipamentos e serviços coletivos	83.2816			5
																		Dinamização das atividades económicas	84.5227			6
																		Gestão de competências	100			7
