# Supplementary material
Source: Research Square preprint supplement (doi:10.21203/rs.3.rs-9567597/v1)
Supplement: Supplementary file 4 [file 94f01e8738bf40f5fabbb7c0.xlsx]

## Sheet: respostas_original
id	matrix	session_id	matrixid	r2	consistent	complete	retries	dim	vetor_1	vetor_2	vetor_3	vetor_4	vetor_5
1	1.00,0.33,0.33,0.33,0.33,3.00,1.00,0.33,0.33,0.33,3.00,3.00,1.00,0.33,0.33,3.00,3.00,3.00,1.00,0.33,3.00,3.00,3.00,3.00,1.00	559eb3d3796c9	0	0.6045	1	1	0	5	0.0724	0.1161	0.1722	0.2511	0.3882
2	1.00,0.33,0.33,3.00,3.00,1.00,3.00,3.00,3.00,0.33,1.00,3.00,0.33,0.33,0.33,1.00	559eb3d3796c9	1.0	0.6529	1	1	0	4	0.1686	0.463	0.2725	0.0959
3	1.00,3.00,2.00,2.00,2.00,0.33,1.00,0.50,0.50,0.50,0.50,2.00,1.00,2.00,1.00,0.50,2.00,0.50,1.00,0.50,0.50,2.00,1.00,2.00,1.00	559eaf66667b9	0	0.8753	1	1	1	5	0.3439	0.0969	0.2086	0.142	0.2086
4	1.00,0.50,2.00,2.00,3.00,2.00,1.00,3.00,2.00,2.00,0.50,0.33,1.00,0.50,2.00,0.50,0.50,2.00,1.00,0.50,0.33,0.50,0.50,2.00,1.00	559eb38c8eb73	0	0.6562	1	1	0	5	0.2524	0.3339	0.1305	0.1439	0.1393
5	1.00,4.00,0.33,1.00,0.33,0.25,1.00,1.00,0.33,3.00,3.00,1.00,1.00,0.33,1.00,1.00,3.00,3.00,1.00,1.00,3.00,0.33,1.00,1.00,1.00	559eb3c414fb5	0	0.1390	0	1	2	5	0.1856	0.172	0.1755	0.2694	0.1976
6	1.00,0.33,1.00,0.50,0.50,3.00,1.00,2.00,3.00,2.00,1.00,0.50,1.00,0.33,0.50,2.00,0.33,3.00,1.00,1.00,2.00,0.50,2.00,1.00,1.00	559eb3d815baf	0	0.7378	1	1	0	5	0.1066	0.369	0.1134	0.2104	0.2007
7	1.00,0.50,2.00,0.33,2.00,2.00,1.00,2.00,0.33,0.50,0.50,0.50,1.00,0.50,2.00,3.00,3.00,2.00,1.00,3.00,0.50,2.00,0.50,0.33,1.00	559eb3d8dd52d	0	0.6136	1	1	0	5	0.1699	0.1775	0.1423	0.3754	0.135
8	1.00,3.00,1.00,1.00,0.25,0.33,1.00,1.00,1.00,1.00,1.00,1.00,1.00,0.33,1.00,1.00,1.00,3.00,1.00,1.00,4.00,1.00,1.00,1.00,1.00	559eb3e4b7710	0	0.1864	0	1	2	5	0.1995	0.1594	0.1469	0.2348	0.2594
9	1.00,0.50,0.33,4.00,3.00,2.00,1.00,2.00,4.00,3.00,3.00,0.50,1.00,3.00,1.00,0.25,0.25,0.33,1.00,0.33,0.33,0.33,1.00,3.00,1.00	559eb3e3e29b8	0	0.7214	1	1	0	5	0.2087	0.3492	0.2367	0.0626	0.1428
10	1.00,2.00,2.00,0.33,0.50,0.50,1.00,2.00,0.33,0.33,0.50,0.50,1.00,0.33,0.33,3.00,3.00,3.00,1.00,2.00,2.00,3.00,3.00,0.50,1.00	559eb3d767ed6	0	0.8377	1	1	0	5	0.1577	0.1144	0.0857	0.3794	0.2628
11	1.00,0.33,2.00,0.33,0.25,3.00,1.00,3.00,0.25,0.33,0.50,0.33,1.00,0.25,0.25,3.00,4.00,4.00,1.00,2.00,4.00,3.00,4.00,0.50,1.00	559eb3d0a5c75	0	0.7645	1	1	0	5	0.0953	0.1569	0.0651	0.3917	0.291
12	1.00,3.00,2.00,1.00,1.00,0.33,1.00,0.50,0.50,0.50,0.50,2.00,1.00,2.00,0.50,1.00,2.00,0.50,1.00,0.50,1.00,2.00,2.00,2.00,1.00	559eb3da0c756	0	0.7499	1	1	0	5	0.2668	0.098	0.1895	0.1682	0.2775
13	1.00,1.00,3.00,3.00,3.00,1.00,1.00,4.00,3.00,3.00,0.33,0.25,1.00,0.33,0.33,0.33,0.33,3.00,1.00,3.00,0.33,0.33,3.00,0.33,1.00	559eb3dd03eb2	0	0.7518	1	1	0	5	0.3144	0.3287	0.0688	0.1721	0.116
14	1.00,0.50,1.00,0.50,1.00,2.00,1.00,2.00,3.00,1.00,1.00,0.50,1.00,1.00,0.33,2.00,0.33,1.00,1.00,1.00,1.00,1.00,3.00,1.00,1.00	559eb3e7ce917	0	0.5866	0	1	2	5	0.1451	0.3056	0.1297	0.1791	0.2405
15	1.00,0.33,0.33,0.33,3.00,1.00,0.25,0.33,3.00,4.00,1.00,3.00,3.00,3.00,0.33,1.00	559eb3d3796c9	1.1	0.6537	1	1	0	4	0.0963	0.1555	0.4861	0.262
16	1.00,4.00,4.00,0.50,4.00,0.25,1.00,1.00,0.50,1.00,0.25,1.00,1.00,1.00,2.00,2.00,2.00,1.00,1.00,1.00,0.25,1.00,0.50,1.00,1.00	559eb3963b819	0	0.6899	1	1	1	5	0.3628	0.1094	0.1567	0.25	0.1211
17	1.00,0.33,0.50,1.00,0.50,3.00,1.00,2.00,2.00,1.00,2.00,0.50,1.00,1.00,0.50,1.00,0.50,1.00,1.00,0.50,2.00,1.00,2.00,2.00,1.00	559eb3d7662ef	0	0.9127	1	1	0	5	0.1147	0.3025	0.1624	0.1401	0.2803
18	1.00,2.00,2.00,0.50,0.50,1.00,1.00,1.00,0.50,1.00,1.00,0.50,2.00,1.00,2.00,1.00	559eb3d815baf	1.0	0.5945	0	1	1	4	0.2875	0.2062	0.1646	0.3417
19	1.00,0.50,0.50,0.50,0.33,2.00,1.00,0.50,0.50,0.50,2.00,2.00,1.00,0.50,0.50,2.00,2.00,2.00,1.00,0.50,3.00,2.00,2.00,2.00,1.00	559eb3d7b0145	0	0.8243	1	1	0	5	0.0958	0.1408	0.1842	0.2397	0.3395
20	1.00,0.33,0.33,0.50,0.33,3.00,1.00,0.33,0.50,0.33,3.00,3.00,1.00,3.00,0.33,2.00,2.00,0.33,1.00,0.50,3.00,3.00,3.00,2.00,1.00	559eb35aab9a4	0	0.6582	1	1	1	5	0.0781	0.1257	0.2667	0.1581	0.3714
21	1.00,0.50,1.00,1.00,0.50,2.00,1.00,3.00,1.00,1.00,1.00,0.33,1.00,2.00,1.00,1.00,1.00,0.50,1.00,1.00,2.00,1.00,1.00,1.00,1.00	559eb3d05a472	0	0.4140	0	1	2	5	0.141	0.2794	0.1878	0.1739	0.2179
22	1.00,0.50,0.50,0.33,0.25,2.00,1.00,0.33,1.00,0.50,2.00,3.00,1.00,1.00,1.00,3.00,1.00,1.00,1.00,1.00,4.00,2.00,1.00,1.00,1.00	559eb3968ff70	0	0.7988	1	1	0	5	0.0848	0.1502	0.265	0.2283	0.2717
23	1.00,2.00,0.50,0.50,0.50,1.00,0.50,0.50,2.00,2.00,1.00,0.50,2.00,2.00,2.00,1.00	559eb38c8eb73	1.0	0.7481	1	1	1	4	0.1981	0.1397	0.2748	0.3873
24	1.00,0.50,0.50,0.50,2.00,1.00,0.50,0.50,2.00,2.00,1.00,0.50,2.00,2.00,2.00,1.00	559eb3d767ed6	1.0	0.7481	1	1	0	4	0.1397	0.1981	0.2748	0.3873
25	1.00,0.33,1.00,1.00,1.00,3.00,1.00,1.00,3.00,1.00,1.00,1.00,1.00,1.00,1.00,1.00,0.33,1.00,1.00,0.33,1.00,1.00,1.00,3.00,1.00	559eb41b6bef1	0	0.6773	1	1	0	5	0.1551	0.2931	0.1915	0.1244	0.2359
26	1.00,1.00,3.00,1.00,0.25,1.00,1.00,2.00,0.33,0.25,0.33,0.50,1.00,0.33,0.50,1.00,3.00,3.00,1.00,0.33,4.00,4.00,2.00,3.00,1.00	559eb3e1e84d7	0	0.6042	1	1	1	5	0.1596	0.1179	0.0924	0.2088	0.4213
27	1.00,3.00,0.33,0.25,0.33,1.00,0.33,0.33,3.00,3.00,1.00,1.00,4.00,3.00,1.00,1.00	559eb3d8dd52d	1.0	0.7402	1	1	0	4	0.1604	0.0985	0.3555	0.3855
28	1.00,3.00,3.00,3.00,0.33,1.00,0.33,0.33,0.33,3.00,1.00,0.33,0.33,3.00,3.00,1.00	559eb3c414fb5	1.0	0.6529	1	1	1	4	0.463	0.0959	0.1686	0.2725
29	1.00,3.00,2.00,0.50,0.33,1.00,0.50,0.50,0.50,2.00,1.00,0.50,2.00,2.00,2.00,1.00	559eb3da0c756	1.0	0.7443	1	1	0	4	0.2999	0.1257	0.1906	0.3838
30	1.00,4.00,3.00,0.33,0.25,1.00,0.33,0.33,0.33,3.00,1.00,3.00,3.00,3.00,0.33,1.00	559eb3d3796c9	1.2	0.5157	0	1	1	4	0.324	0.0721	0.3006	0.3032
31	1.00,1.00,2.00,0.50,0.25,1.00,1.00,3.00,0.50,0.33,0.50,0.33,1.00,0.33,0.33,2.00,2.00,3.00,1.00,0.33,4.00,3.00,3.00,3.00,1.00	559eb3d451778	0	0.7414	1	1	0	5	0.1251	0.1492	0.0797	0.2187	0.4273
32	1.00,0.25,1.00,1.00,0.33,4.00,1.00,3.00,3.00,1.00,1.00,0.33,1.00,1.00,1.00,1.00,0.33,1.00,1.00,1.00,3.00,1.00,1.00,1.00,1.00	559eb3e90973e	0	0.8549	1	1	0	5	0.1097	0.3662	0.1462	0.1462	0.2319
33	1.00,0.33,1.00,1.00,0.33,3.00,1.00,1.00,1.00,1.00,1.00,1.00,1.00,0.33,1.00,1.00,1.00,3.00,1.00,0.50,3.00,1.00,1.00,2.00,1.00	559eb40060fc5	0	0.4933	0	1	2	5	0.1211	0.2311	0.1616	0.2177	0.2686
34	1.00,1.00,1.00,0.33,1.00,1.00,0.50,0.50,1.00,2.00,1.00,0.50,3.00,2.00,2.00,1.00	559eaf66667b9	1.0	0.8358	1	1	1	4	0.1746	0.1647	0.2341	0.4266
35	1.00,4.00,4.00,4.00,0.25,1.00,2.00,0.50,0.25,0.50,1.00,0.50,0.25,2.00,2.00,1.00	559eb3d815baf	1.1	0.8542	1	1	0	4	0.554	0.1454	0.101	0.1996
36	1.00,1.00,2.00,1.00,2.00,1.00,1.00,2.00,1.00,2.00,0.50,0.50,1.00,0.50,0.50,1.00,1.00,2.00,1.00,2.00,0.50,0.50,2.00,0.50,1.00	559eb431c970c	0	0.8788	1	1	0	5	0.2478	0.2478	0.1106	0.2478	0.1461
37	1.00,3.00,4.00,4.00,0.33,1.00,3.00,4.00,0.25,0.33,1.00,1.00,0.25,0.25,1.00,1.00	559eb3e4b7710	1.0	0.8632	1	1	0	4	0.5111	0.2833	0.1051	0.1005
38	1.00,0.33,1.00,0.33,0.50,3.00,1.00,2.00,0.50,2.00,1.00,0.50,1.00,0.33,0.33,3.00,2.00,3.00,1.00,2.00,2.00,0.50,3.00,0.50,1.00	559eaf4cd13ea	0	0.8529	1	1	0	5	0.0975	0.2522	0.0995	0.3559	0.1949
39	1.00,0.25,0.25,0.25,0.25,4.00,1.00,4.00,1.00,1.00,4.00,0.25,1.00,0.25,2.00,4.00,1.00,4.00,1.00,1.00,4.00,1.00,0.50,1.00,1.00	559eb3c3b593d	0	0.6864	1	1	0	5	0.055	0.2815	0.1723	0.2815	0.2097
40	1.00,1.00,2.00,1.00,1.00,1.00,2.00,2.00,0.50,0.50,1.00,1.00,1.00,0.50,1.00,1.00	559eb3d0a5c75	1.0	0.8352	1	1	0	4	0.2881	0.3381	0.169	0.2048
41	1.00,3.00,2.00,1.00,0.33,1.00,0.50,0.50,0.50,2.00,1.00,2.00,1.00,2.00,0.50,1.00	559eb3d05a472	1.0	0.7902	1	1	0	4	0.3625	0.1197	0.2802	0.2375
42	1.00,3.00,3.00,2.00,0.33,1.00,0.50,0.50,0.33,2.00,1.00,0.50,0.50,2.00,2.00,1.00	559eb3d767ed6	1.1	0.8923	1	1	0	4	0.4495	0.1202	0.1707	0.2596
43	1.00,3.00,3.00,1.00,2.00,0.33,1.00,3.00,0.33,1.00,0.33,0.33,1.00,0.33,0.50,1.00,3.00,3.00,1.00,3.00,0.50,1.00,2.00,0.33,1.00	559eb414bdb9b	0	0.8107	1	1	0	5	0.3052	0.1439	0.0813	0.3318	0.1378
44	1.00,2.00,1.00,1.00,0.50,1.00,1.00,0.50,1.00,1.00,1.00,2.00,1.00,2.00,0.50,1.00	559eb3e7ce917	1.0	0.4602	0	1	1	4	0.2817	0.1766	0.2956	0.246
45	1.00,4.00,4.00,1.00,0.25,1.00,0.33,0.33,0.25,3.00,1.00,0.25,1.00,3.00,4.00,1.00	559eb3963b819	1.0	0.7828	1	1	0	4	0.3948	0.0889	0.1442	0.3721
46	1.00,4.00,1.00,3.00,0.25,1.00,1.00,2.00,1.00,1.00,1.00,3.00,0.33,0.50,0.33,1.00	559eaf66667b9	1.1	0.7181	1	1	0	4	0.409	0.1932	0.2936	0.1043
47	1.00,3.00,2.00,1.00,0.33,1.00,1.00,0.33,0.50,1.00,1.00,0.33,1.00,3.00,3.00,1.00	559eb3d8dd52d	1.1	0.9690	1	1	0	4	0.3472	0.1276	0.1423	0.3829
48	1.00,0.50,4.00,4.00,2.00,1.00,4.00,4.00,0.25,0.25,1.00,4.00,0.25,0.25,0.25,1.00	559eb3e3e29b8	1.0	0.7027	1	1	0	4	0.319	0.4529	0.1531	0.0751
49	1.00,0.50,0.50,2.00,2.00,1.00,2.00,2.00,2.00,0.50,1.00,1.00,0.50,0.50,1.00,1.00	559eb3d815baf	1.2	0.6577	1	1	0	4	0.2066	0.3854	0.2381	0.1699
50	1.00,4.00,3.00,0.25,1.00,0.33,0.33,3.00,1.00	559eb3d3796c9	1.3	0.8770	1	1	0	3	0.608	0.1199	0.2721
51	1.00,2.00,2.00,0.50,0.50,1.00,2.00,0.50,0.50,0.50,1.00,0.50,2.00,2.00,2.00,1.00	559eb3d7b0145	1.0	0.7481	1	1	0	4	0.2748	0.1981	0.1397	0.3873
52	1.00,1.00,1.00,1.00,1.00,1.00,1.00,3.00,1.00,1.00,1.00,0.50,1.00,0.33,2.00,1.00	559eb3e90973e	1.0	0.2321	0	1	1	4	0.233	0.3239	0.2102	0.233
53	1.00,0.25,0.25,2.00,0.33,4.00,1.00,0.25,3.00,4.00,4.00,4.00,1.00,3.00,3.00,0.50,0.33,0.33,1.00,0.33,3.00,0.25,0.33,3.00,1.00	559eb3c4d8369	0	0.5955	0	1	2	5	0.0887	0.2637	0.4127	0.0746	0.1604
54	1.00,2.00,2.00,2.00,0.50,1.00,1.00,0.50,0.50,1.00,1.00,0.50,0.50,2.00,2.00,1.00	559eb38c8eb73	1.1	0.8504	1	1	0	4	0.3917	0.1646	0.1646	0.2792
55	1.00,3.00,3.00,0.50,0.33,1.00,3.00,0.50,0.33,0.33,1.00,0.50,2.00,2.00,2.00,1.00	559eb3da0c756	1.1	0.6114	1	1	0	4	0.3199	0.1955	0.1137	0.3709
56	1.00,4.00,0.25,0.25,0.50,0.25,1.00,4.00,4.00,0.33,4.00,0.25,1.00,4.00,0.33,4.00,0.25,0.25,1.00,0.33,2.00,3.00,3.00,3.00,1.00	559eb440a5b8a	0	0.2396	0	1	2	5	0.1619	0.2141	0.1925	0.1259	0.3057
57	1.00,0.50,0.50,0.50,2.00,1.00,1.00,1.00,2.00,1.00,1.00,1.00,2.00,1.00,1.00,1.00	559eb431c970c	1.0	1.0000	1	1	0	4	0.1429	0.2857	0.2857	0.2857
58	1.00,4.00,3.00,0.50,0.25,1.00,3.00,2.00,0.33,0.33,1.00,0.50,2.00,0.50,2.00,1.00	559eb35aab9a4	1.0	0.4305	0	1	1	4	0.3558	0.2686	0.0966	0.279
59	1.00,0.25,0.33,4.00,1.00,3.00,3.00,0.33,1.00	559eb3d3796c9	1.4	0.8770	1	1	0	3	0.1199	0.608	0.2721
60	1.00,0.33,0.50,0.50,3.00,1.00,0.25,3.00,2.00,4.00,1.00,0.50,2.00,0.33,2.00,1.00	559eb3e1e84d7	1.0	0.2553	0	1	1	4	0.1043	0.3045	0.3306	0.2605
61	1.00,0.33,0.33,0.33,3.00,1.00,0.33,0.33,3.00,3.00,1.00,0.33,3.00,3.00,3.00,1.00	559eb41b6bef1	1.0	0.6529	1	1	0	4	0.0959	0.1686	0.2725	0.463
62	1.00,0.33,0.50,0.50,3.00,1.00,3.00,2.00,2.00,0.33,1.00,1.00,2.00,0.50,1.00,1.00	559eaf66667b9	1.2	0.8898	1	1	0	4	0.1202	0.4566	0.202	0.2212
63	1.00,2.00,1.00,2.00,1.00,0.50,1.00,2.00,2.00,2.00,1.00,0.50,1.00,2.00,2.00,0.50,0.50,0.50,1.00,0.50,1.00,0.50,0.50,2.00,1.00	559eb3e700fe0	0	0.6021	1	1	1	5	0.2541	0.2554	0.2182	0.1048	0.1674
64	1.00,3.00,2.00,2.00,0.33,1.00,0.50,0.50,0.50,2.00,1.00,1.00,0.50,2.00,1.00,1.00	559eb3d767ed6	1.2	0.9705	1	1	0	4	0.4231	0.1225	0.2272	0.2272
65	1.00,4.00,4.00,0.25,1.00,2.00,0.25,0.50,1.00	559eb3d815baf	1.3	0.9029	1	1	1	3	0.6551	0.2114	0.1335
66	1.00,0.33,2.00,0.50,3.00,1.00,2.00,2.00,0.50,0.50,1.00,1.00,2.00,0.50,1.00,1.00	559eb3d05a472	1.1	0.7082	1	1	0	4	0.1853	0.417	0.17	0.2277
67	1.00,3.00,3.00,1.00,0.33,1.00,2.00,2.00,0.33,0.50,1.00,2.00,1.00,0.50,0.50,1.00	559eb3dd03eb2	1.0	0.4716	0	1	1	4	0.4008	0.2415	0.178	0.1796
68	1.00,0.50,0.50,0.50,2.00,1.00,2.00,1.00,2.00,0.50,1.00,1.00,2.00,1.00,1.00,1.00	559eb3d451778	1.0	0.8395	1	1	1	4	0.1409	0.3373	0.2401	0.2817
69	1.00,0.50,0.50,0.50,2.00,1.00,2.00,0.50,2.00,0.50,1.00,0.50,2.00,2.00,2.00,1.00	559eb3d7b0145	1.1	0.7481	1	1	0	4	0.1397	0.2748	0.1981	0.3873
70	1.00,4.00,3.00,1.00,0.25,1.00,0.50,0.33,0.33,2.00,1.00,0.33,1.00,3.00,3.00,1.00	559eb3e3e29b8	1.1	0.9429	1	1	0	4	0.3905	0.0971	0.1468	0.3655
71	1.00,4.00,4.00,4.00,0.25,1.00,3.00,3.00,0.25,0.33,1.00,0.33,0.25,0.33,3.00,1.00	559eb3c414fb5	1.1	0.6942	1	1	0	4	0.5302	0.238	0.0831	0.1486
72	1.00,1.00,2.00,1.00,1.00,1.00,0.50,1.00,1.00	559eb3d767ed6	1.3	0.6733	1	1	0	3	0.4111	0.3278	0.2611
73	1.00,0.50,0.50,0.50,2.00,1.00,2.00,2.00,2.00,0.50,1.00,0.33,2.00,0.50,3.00,1.00	559eb3da0c756	1.2	0.6355	1	1	0	4	0.1376	0.3788	0.1816	0.302
74	1.00,2.00,1.00,2.00,0.50,1.00,4.00,1.00,1.00,0.25,1.00,1.00,0.50,1.00,1.00,1.00	559eb3d0a5c75	1.1	0.3108	0	1	1	4	0.3367	0.2933	0.1838	0.1862
75	1.00,1.00,0.33,1.00,1.00,1.00,3.00,1.00,1.00	559eb3d815baf	1.4	0.6844	1	1	0	3	0.2254	0.3206	0.454
76	1.00,1.00,1.00,0.50,1.00,1.00,1.00,0.33,1.00,1.00,1.00,1.00,2.00,3.00,1.00,1.00	559eb3e90973e	1.1	0.7192	1	1	0	4	0.1983	0.1836	0.2424	0.3757
77	1.00,3.00,0.50,0.33,1.00,0.33,2.00,3.00,1.00	559eaf66667b9	1.3	0.8833	1	1	0	3	0.3338	0.1416	0.5247
78	1.00,1.00,0.50,2.00,1.00,1.00,1.00,2.00,2.00,1.00,1.00,2.00,0.50,0.50,0.50,1.00	559eb3d7662ef	1.0	0.8395	1	1	1	4	0.2401	0.2817	0.3373	0.1409
79	1.00,1.00,0.33,1.00,1.00,1.00,0.33,1.00,3.00,3.00,1.00,1.00,1.00,1.00,1.00,1.00	559eb41b6bef1	1.1	0.7771	1	1	0	4	0.1771	0.1771	0.4062	0.2396
80	1.00,2.00,0.50,0.33,0.50,1.00,0.33,0.33,2.00,3.00,1.00,0.50,3.00,3.00,2.00,1.00	559eb431c970c	1.1	0.8765	1	1	0	4	0.1651	0.1072	0.2832	0.4445
81	1.00,1.00,1.00,1.00,1.00,0.50,1.00,2.00,1.00	559eb3d767ed6	1.4	0.6733	1	1	0	3	0.3278	0.2611	0.4111
82	1.00,3.00,3.00,0.33,0.33,1.00,3.00,4.00,0.33,0.33,1.00,0.33,3.00,0.25,3.00,1.00	559eb3963b819	1.1	0.3603	0	1	1	4	0.3069	0.3239	0.0757	0.2935
83	1.00,3.00,0.50,2.00,2.00,0.33,1.00,0.50,0.33,0.50,2.00,2.00,1.00,0.50,3.00,0.50,3.00,2.00,1.00,2.00,0.50,2.00,0.33,0.50,1.00	559eb3a34ae7f	0	0.7041	1	1	1	5	0.2631	0.0838	0.2685	0.2631	0.1214
84	1.00,3.00,0.33,0.33,0.25,0.33,1.00,0.50,0.33,0.33,3.00,2.00,1.00,0.25,1.00,3.00,3.00,4.00,1.00,1.00,4.00,3.00,1.00,1.00,1.00	559eb3ddd0c2b	0	0.6249	1	1	1	5	0.1142	0.0786	0.1885	0.3444	0.2742
85	1.00,3.00,1.00,0.25,0.33,1.00,0.50,0.33,1.00,2.00,1.00,0.33,4.00,3.00,3.00,1.00	559eb414bdb9b	1.0	0.7080	1	1	0	4	0.2009	0.1071	0.184	0.508
86	1.00,1.00,1.00,1.00,1.00,1.00,1.00,1.00,1.00	559eaf66667b9	1.4	1.0000	1	1	0	3	0.3333	0.3333	0.3333
87	1.00,0.50,0.50,0.50,2.00,1.00,2.00,0.50,2.00,0.50,1.00,2.00,2.00,2.00,0.50,1.00	559eb38c8eb73	1.2	0.4745	0	1	1	4	0.1295	0.2902	0.2902	0.2902
88	1.00,2.00,2.00,2.00,0.50,1.00,0.50,0.50,0.50,2.00,1.00,0.50,0.50,2.00,2.00,1.00	559eb3e700fe0	1.0	0.7481	1	1	0	4	0.3873	0.1397	0.1981	0.2748
89	1.00,3.00,3.00,2.00,0.33,1.00,2.00,2.00,0.33,0.50,1.00,1.00,0.50,0.50,1.00,1.00	559eb3d05a472	1.2	0.7918	1	1	0	4	0.4559	0.2432	0.1408	0.1601
90	1.00,0.50,0.50,2.00,1.00,2.00,2.00,0.50,1.00	559eb3da0c756	1.3	0.8227	1	1	0	3	0.1976	0.4905	0.3119
91	1.00,1.00,1.00,0.33,1.00,1.00,0.33,0.33,1.00,3.00,1.00,0.33,3.00,3.00,3.00,1.00	559eb3e7ce917	1.1	0.8007	1	1	0	4	0.1615	0.1302	0.224	0.4844
92	1.00,2.00,2.00,1.00,2.00,0.50,1.00,3.00,0.50,1.00,0.50,0.33,1.00,0.50,0.50,1.00,2.00,2.00,1.00,2.00,0.50,1.00,2.00,0.50,1.00	559eb3e3dbe27	0	0.7197	1	1	0	5	0.279	0.1795	0.1031	0.279	0.1595
93	1.00,2.00,2.00,2.00,0.50,1.00,0.50,0.50,0.50,2.00,1.00,2.00,0.50,2.00,0.50,1.00	559eb3d7b0145	1.2	0.7481	1	1	0	4	0.3873	0.1397	0.2748	0.1981
94	1.00,4.00,1.00,3.00,0.33,0.25,1.00,0.33,0.33,0.33,1.00,3.00,1.00,0.50,1.00,0.33,3.00,2.00,1.00,0.33,3.00,3.00,1.00,3.00,1.00	559eb439a9090	0	0.6211	1	1	2	5	0.2293	0.0665	0.1956	0.1776	0.3311
95	1.00,0.25,1.00,1.00,4.00,1.00,4.00,3.00,1.00,0.25,1.00,0.33,1.00,0.33,3.00,1.00	559eb3d8dd52d	1.2	0.8979	1	1	0	4	0.1445	0.531	0.1132	0.2114
96	1.00,1.00,1.00,2.00,1.00,1.00,3.00,4.00,1.00,0.33,1.00,0.25,0.50,0.25,4.00,1.00	559eb3c3b593d	1.0	0.4906	0	1	1	4	0.2649	0.3895	0.1401	0.2055
97	1.00,3.00,1.00,3.00,0.33,1.00,0.33,1.00,1.00,3.00,1.00,3.00,0.33,1.00,0.33,1.00	559eb3c414fb5	1.2	1.0000	1	1	1	4	0.375	0.125	0.375	0.125
98	1.00,3.00,3.00,3.00,3.00,0.33,1.00,2.00,1.00,2.00,0.33,0.50,1.00,1.00,1.00,0.33,1.00,1.00,1.00,1.00,0.33,0.50,1.00,1.00,1.00	559eb4012c584	0	0.9112	1	1	0	5	0.4214	0.1905	0.1238	0.1405	0.1238
99	1.00,1.00,1.00,1.00,1.00,1.00,1.00,1.00,1.00,1.00,1.00,1.00,1.00,1.00,1.00,1.00	559eb3968ff70	1.0	1.0000	1	1	1	4	0.25	0.25	0.25	0.25
100	1.00,3.00,4.00,0.33,0.33,1.00,3.00,0.33,0.25,0.33,1.00,0.33,3.00,3.00,3.00,1.00	559eb440a5b8a	1.0	0.6570	1	1	1	4	0.2894	0.1621	0.0894	0.4591
101	1.00,1.00,0.33,1.00,1.00,0.33,3.00,3.00,1.00	559eb3c414fb5	1.3	1.0000	1	1	0	3	0.2	0.2	0.6
102	1.00,0.25,0.25,0.25,4.00,1.00,0.33,0.25,4.00,3.00,1.00,0.25,4.00,4.00,4.00,1.00	559eb3dd03eb2	1.1	0.6187	1	1	0	4	0.0737	0.1579	0.2483	0.5201
103	1.00,4.00,4.00,4.00,0.25,1.00,4.00,3.00,0.25,0.25,1.00,0.33,0.25,0.33,3.00,1.00	559eb3e3e29b8	1.2	0.6795	1	1	0	4	0.5253	0.2538	0.0777	0.1431
104	1.00,4.00,2.00,3.00,0.25,1.00,0.50,0.33,0.50,2.00,1.00,0.50,0.33,3.00,2.00,1.00	559eb3c4d8369	1.0	0.8594	1	1	0	4	0.4661	0.095	0.1813	0.2576
105	1.00,3.00,3.00,0.25,0.33,1.00,0.25,0.25,0.33,4.00,1.00,0.33,4.00,4.00,3.00,1.00	559eb3e1e84d7	1.1	0.6254	1	1	0	4	0.2442	0.0783	0.178	0.4996
106	1.00,0.50,0.50,2.00,1.00,2.00,2.00,0.50,1.00	559eb3d7b0145	1.3	0.8227	1	1	0	3	0.1976	0.4905	0.3119
107	1.00,4.00,4.00,1.00,0.25,1.00,2.00,0.50,0.25,0.50,1.00,0.50,1.00,2.00,2.00,1.00	559eb3e700fe0	1.1	0.8694	1	1	0	4	0.4278	0.1556	0.1111	0.3056
108	1.00,1.00,3.00,3.00,1.00,1.00,3.00,4.00,0.33,0.33,1.00,3.00,0.33,0.25,0.33,1.00	559eb3e4b7710	1.1	0.8512	1	1	1	4	0.361	0.3837	0.1658	0.0895
109	1.00,3.00,2.00,1.00,0.33,1.00,0.50,0.33,0.50,2.00,1.00,0.50,1.00,3.00,2.00,1.00	559eb431c970c	1.2	0.9830	1	1	0	4	0.3507	0.1093	0.1892	0.3507
110	1.00,1.00,1.00,0.50,1.00,1.00,1.00,1.00,1.00,1.00,1.00,1.00,2.00,1.00,1.00,1.00	559eb3e90973e	1.2	0.4950	0	1	1	4	0.2107	0.2464	0.2464	0.2964
111	1.00,2.00,0.25,0.50,1.00,0.25,4.00,4.00,1.00	559eb3e3e29b8	1.3	0.9029	1	1	0	3	0.2114	0.1335	0.6551
112	1.00,2.00,0.33,0.33,0.50,1.00,0.33,1.00,3.00,3.00,1.00,0.33,3.00,1.00,3.00,1.00	559eb40060fc5	1.0	0.4730	0	1	1	4	0.1539	0.164	0.292	0.3902
113	1.00,0.25,1.00,0.25,4.00,1.00,1.00,1.00,1.00,1.00,1.00,1.00,4.00,1.00,1.00,1.00	559eb3c3b593d	1.1	0.7673	1	1	0	4	0.126	0.3163	0.2413	0.3163
114	1.00,0.50,0.50,2.00,1.00,2.00,2.00,0.50,1.00	559eb3d05a472	1.3	0.8227	1	1	0	3	0.1976	0.4905	0.3119
115	1.00,1.00,0.50,1.00,1.00,0.50,2.00,2.00,1.00	559eb3d7b0145	1.4	1.0000	1	1	0	3	0.25	0.25	0.5
116	1.00,1.00,0.33,1.00,1.00,0.33,3.00,3.00,1.00	559eb3c414fb5	1.4	1.0000	1	1	0	3	0.2	0.2	0.6
117	1.00,0.50,0.50,2.00,2.00,1.00,0.50,1.00,2.00,2.00,1.00,0.50,0.50,1.00,2.00,1.00	559eb3d7662ef	1.1	0.0921	0	1	1	4	0.2156	0.2333	0.2923	0.2588
118	1.00,2.00,2.00,1.00,3.00,0.50,1.00,1.00,1.00,1.00,0.50,1.00,1.00,1.00,2.00,1.00,1.00,1.00,1.00,1.00,0.33,1.00,0.50,1.00,1.00	559eb41bcadc1	0	0.7568	1	1	0	5	0.3144	0.1647	0.1897	0.1947	0.1365
119	1.00,2.00,1.00,0.50,1.00,0.50,1.00,2.00,1.00	559eb431c970c	1.3	1.0000	1	1	0	3	0.4	0.2	0.4
120	1.00,3.00,0.50,0.25,0.33,1.00,0.33,0.25,2.00,3.00,1.00,0.50,4.00,4.00,2.00,1.00	559eb3d451778	1.1	0.8294	1	1	0	4	0.1661	0.0871	0.2641	0.4827
121	1.00,1.00,0.50,1.00,1.00,0.50,2.00,2.00,1.00	559eb3da0c756	1.4	1.0000	1	1	0	3	0.25	0.25	0.5
122	1.00,0.33,0.25,3.00,1.00,0.25,4.00,4.00,1.00	559eb3e3e29b8	1.4	0.7851	1	1	0	3	0.1181	0.2431	0.6389
123	1.00,2.00,0.50,1.00,0.50,1.00,0.33,1.00,2.00,3.00,1.00,1.00,1.00,1.00,1.00,1.00	559eb3968ff70	1.1	0.7624	1	1	0	4	0.2336	0.1554	0.369	0.242
124	1.00,3.00,1.00,2.00,0.33,1.00,1.00,1.00,1.00,1.00,1.00,1.00,0.50,1.00,1.00,1.00	559eb3d0a5c75	1.2	0.7192	1	1	1	4	0.3757	0.1836	0.2424	0.1983
125	1.00,0.33,0.50,3.00,3.00,1.00,3.00,3.00,2.00,0.33,1.00,2.00,0.33,0.33,0.50,1.00	559eb35aab9a4	1.1	0.7163	1	1	0	4	0.1895	0.4768	0.2262	0.1076
126	1.00,3.00,3.00,0.33,1.00,0.33,0.33,3.00,1.00	559eb38c8eb73	1.3	0.7472	1	1	0	3	0.5736	0.1399	0.2864
127	1.00,3.00,3.00,3.00,0.33,1.00,3.00,3.00,0.33,0.33,1.00,2.00,0.33,0.33,0.50,1.00	559eb3e700fe0	1.2	0.7371	1	1	0	4	0.469	0.2786	0.1484	0.104
128	1.00,4.00,4.00,4.00,0.25,1.00,0.33,1.00,0.25,3.00,1.00,0.25,0.25,1.00,4.00,1.00	559eb3963b819	1.2	0.6400	1	1	0	4	0.5211	0.1124	0.1558	0.2106
129	1.00,0.25,0.25,0.25,4.00,1.00,4.00,4.00,4.00,0.25,1.00,0.33,4.00,0.25,3.00,1.00	559eb440a5b8a	1.1	0.6187	1	1	0	4	0.0737	0.5201	0.1579	0.2483
130	1.00,0.50,1.00,2.00,1.00,1.00,1.00,1.00,1.00	559eb3e90973e	1.3	0.6733	1	1	0	3	0.2611	0.4111	0.3278
131	1.00,3.00,3.00,3.00,3.00,0.33,1.00,3.00,3.00,3.00,0.33,0.33,1.00,0.50,3.00,0.33,0.33,2.00,1.00,4.00,0.33,0.33,0.33,0.25,1.00	559eb560f0b10	0	0.6032	1	1	0	5	0.3903	0.2531	0.1191	0.1677	0.0698
132	1.00,1.00,1.00,1.00,1.00,1.00,1.00,1.00,1.00,1.00,1.00,1.00,1.00,1.00,1.00,1.00	559eb414bdb9b	1.1	1.0000	1	1	1	4	0.25	0.25	0.25	0.25
133	1.00,1.00,0.50,0.33,1.00,1.00,1.00,3.00,2.00,1.00,1.00,4.00,3.00,0.33,0.25,1.00	559eb3e7ce917	1.2	0.4713	0	1	1	4	0.1662	0.2916	0.3573	0.1849
134	1.00,0.25,0.33,0.50,4.00,1.00,3.00,3.00,3.00,0.33,1.00,3.00,2.00,0.33,0.33,1.00	559eb3dd03eb2	1.2	0.8300	1	1	0	4	0.0921	0.4911	0.272	0.1447
135	1.00,0.50,0.50,2.00,1.00,0.50,2.00,2.00,1.00	559eb431c970c	1.4	0.8227	1	1	0	3	0.1976	0.3119	0.4905
136	1.00,2.00,0.50,0.50,1.00,0.50,2.00,2.00,1.00	559eb3e700fe0	1.3	0.8227	1	1	0	3	0.3119	0.1976	0.4905
137	1.00,0.33,1.00,3.00,1.00,1.00,1.00,1.00,1.00	559eb3e90973e	1.4	0.6844	1	1	0	3	0.2254	0.454	0.3206
138	1.00,2.00,2.00,0.50,1.00,0.50,0.50,2.00,1.00	559eb3d05a472	1.4	0.8227	1	1	0	3	0.4905	0.1976	0.3119
139	1.00,0.50,0.50,2.00,1.00,0.50,2.00,2.00,1.00	559eb3d0a5c75	1.3	0.8227	1	1	0	3	0.1976	0.3119	0.4905
140	1.00,3.00,3.00,4.00,0.33,1.00,0.50,0.50,0.33,2.00,1.00,3.00,0.25,2.00,0.33,1.00	559eb3e1e84d7	1.2	0.7700	1	1	0	4	0.497	0.1153	0.2459	0.1418
141	1.00,0.50,3.00,2.00,1.00,2.00,0.33,0.50,1.00	559eb3d8dd52d	1.3	0.6857	1	1	0	3	0.35	0.4778	0.1722
142	1.00,2.00,2.00,0.50,0.50,1.00,2.00,0.50,0.50,0.50,1.00,0.50,2.00,2.00,2.00,1.00	559eb3a34ae7f	1.0	0.7481	1	1	0	4	0.2748	0.1981	0.1397	0.3873
143	1.00,0.50,0.50,1.00,2.00,1.00,2.00,2.00,2.00,0.50,1.00,1.00,1.00,0.50,1.00,1.00	559eb3d7662ef	1.2	0.8416	1	1	1	4	0.1694	0.3944	0.2389	0.1972
144	1.00,1.00,0.25,0.25,1.00,1.00,1.00,4.00,4.00,1.00,1.00,0.25,4.00,0.25,4.00,1.00	559eb3c3b593d	1.2	0.2886	0	1	1	4	0.1233	0.3237	0.2283	0.3247
145	1.00,0.33,3.00,3.00,3.00,1.00,3.00,3.00,0.33,0.33,1.00,3.00,0.33,0.33,0.33,1.00	559eb41b6bef1	1.2	0.6529	1	1	0	4	0.2725	0.463	0.1686	0.0959
146	1.00,1.00,0.50,2.00,2.00,1.00,1.00,0.50,2.00,2.00,2.00,2.00,1.00,4.00,3.00,0.50,0.50,0.25,1.00,0.50,0.50,0.50,0.33,2.00,1.00	559eb3c9146f9	0	0.9542	1	1	0	5	0.2021	0.2021	0.3807	0.0893	0.1257
147	1.00,0.50,0.25,2.00,1.00,0.25,4.00,4.00,1.00	559eb3d0a5c75	1.4	0.9029	1	1	0	3	0.1335	0.2114	0.6551
148	1.00,0.50,0.33,2.00,1.00,1.00,3.00,1.00,1.00	559eb3e7ce917	1.3	0.9503	1	1	0	3	0.1698	0.3873	0.4429
149	1.00,3.00,0.50,0.33,1.00,0.50,2.00,2.00,1.00	559eb3e700fe0	1.4	0.6857	1	1	0	3	0.35	0.1722	0.4778
150	1.00,4.00,4.00,0.25,1.00,0.25,0.25,4.00,1.00	559eb3963b819	1.3	0.6912	1	1	0	3	0.6243	0.1085	0.2672
151	1.00,4.00,3.00,3.00,4.00,0.25,1.00,0.33,0.33,1.00,0.33,3.00,1.00,0.50,1.00,0.33,3.00,2.00,1.00,0.50,0.25,1.00,1.00,2.00,1.00	559eb4120ed9e	0	0.7614	1	1	1	5	0.4353	0.0853	0.1493	0.1779	0.1522
152	1.00,1.00,2.00,1.00,1.00,2.00,0.50,0.50,1.00	559eb38c8eb73	1.4	1.0000	1	1	0	3	0.4	0.4	0.2
153	1.00,1.00,0.33,0.50,1.00,1.00,1.00,1.00,3.00,1.00,1.00,1.00,2.00,1.00,1.00,1.00	559eb3968ff70	1.2	0.7191	1	1	0	4	0.1589	0.2446	0.3161	0.2804
154	1.00,0.50,3.00,2.00,1.00,2.00,0.33,0.50,1.00	559eb3dd03eb2	1.3	0.6857	1	1	1	3	0.35	0.4778	0.1722
155	1.00,0.50,0.33,2.00,1.00,0.33,3.00,3.00,1.00	559eb3d8dd52d	1.4	0.8823	1	1	0	3	0.1593	0.2519	0.5889
156	1.00,2.00,2.00,0.50,1.00,1.00,0.50,1.00,1.00	559eb3d7662ef	1.3	1.0000	1	1	0	3	0.5	0.25	0.25
157	1.00,3.00,3.00,0.25,0.33,1.00,3.00,0.33,0.33,0.33,1.00,0.33,4.00,3.00,3.00,1.00	559eb440a5b8a	1.2	0.5695	0	1	1	4	0.254	0.1673	0.0945	0.4842
158	1.00,0.50,1.00,2.00,1.00,0.33,1.00,3.00,1.00	559eb3e7ce917	1.4	0.3311	0	1	1	3	0.2632	0.2884	0.4484
159	1.00,0.50,0.50,0.50,2.00,1.00,2.00,2.00,2.00,0.50,1.00,0.50,2.00,0.50,2.00,1.00	559eb3e3dbe27	1.0	0.7481	1	1	0	4	0.1397	0.3873	0.1981	0.2748
160	1.00,0.33,3.00,3.00,1.00,0.33,0.33,3.00,1.00	559eb3e1e84d7	1.3	1.0000	1	1	0	3	0.3333	0.3333	0.3333
161	1.00,2.00,3.00,3.00,0.50,1.00,0.33,0.33,0.33,3.00,1.00,0.33,0.33,3.00,3.00,1.00	559eb560f0b10	1.0	0.5210	0	1	1	4	0.4339	0.1147	0.1737	0.2776
162	1.00,1.00,2.00,1.00,1.00,2.00,0.50,0.50,1.00	559eb3d7662ef	1.4	1.0000	1	1	0	3	0.4	0.4	0.2
163	1.00,0.25,0.25,0.25,4.00,1.00,4.00,0.25,4.00,0.25,1.00,0.25,4.00,4.00,4.00,1.00	559eb3ddd0c2b	1.0	0.5838	0	1	1	4	0.0731	0.2662	0.151	0.5097
164	1.00,0.25,4.00,4.00,1.00,4.00,0.25,0.25,1.00	559eb3dd03eb2	1.4	0.6912	1	1	0	3	0.2672	0.6243	0.1085
165	1.00,4.00,4.00,0.25,1.00,3.00,0.25,0.33,1.00	559eb3e1e84d7	1.4	0.7851	1	1	0	3	0.6389	0.2431	0.1181
166	1.00,1.00,3.00,1.00,1.00,0.33,0.33,3.00,1.00	559eb41b6bef1	1.3	0.2492	0	1	1	3	0.4403	0.2352	0.3245
167	1.00,1.00,1.00,1.00,1.00,1.00,2.00,2.00,1.00,0.50,1.00,1.00,1.00,0.50,1.00,1.00	559eb414bdb9b	1.2	0.7604	1	1	1	4	0.2458	0.3458	0.2042	0.2042
168	1.00,2.00,2.00,2.00,0.50,1.00,2.00,0.50,0.50,0.50,1.00,0.33,0.50,2.00,3.00,1.00	559eb3d451778	1.2	0.7443	1	1	0	4	0.3838	0.1906	0.1257	0.2999
169	1.00,0.25,1.00,4.00,4.00,1.00,3.00,1.00,1.00,0.33,1.00,0.33,0.25,1.00,3.00,1.00	559eb40060fc5	1.1	0.2937	0	1	1	4	0.2533	0.39	0.1167	0.24
170	1.00,0.33,0.25,0.33,3.00,1.00,0.50,0.50,4.00,2.00,1.00,2.00,3.00,2.00,0.50,1.00	559eb35aab9a4	1.2	0.9142	1	1	1	4	0.0879	0.2032	0.4262	0.2827
171	1.00,1.00,0.50,1.00,1.00,3.00,2.00,0.33,1.00	559eb3963b819	1.4	0.3311	0	1	1	3	0.2632	0.4484	0.2884
172	1.00,0.25,0.33,4.00,1.00,4.00,3.00,0.25,1.00	559eb440a5b8a	1.3	0.7851	1	1	0	3	0.1181	0.6389	0.2431
173	1.00,0.50,4.00,2.00,1.00,3.00,0.25,0.33,1.00	559eb3c3b593d	1.3	0.7969	1	1	1	3	0.3601	0.5119	0.1279
174	1.00,1.00,0.25,0.33,1.00,1.00,0.50,0.25,4.00,2.00,1.00,4.00,3.00,4.00,0.25,1.00	559eb3e4b7710	1.2	0.6119	1	1	0	4	0.1052	0.1327	0.4777	0.2844
175	1.00,2.00,1.00,0.50,1.00,1.00,1.00,1.00,1.00	559eb3968ff70	1.3	0.6733	1	1	0	3	0.4111	0.2611	0.3278
176	1.00,0.25,0.33,4.00,1.00,0.33,3.00,3.00,1.00	559eb440a5b8a	1.4	0.6510	1	1	0	3	0.1279	0.3118	0.5603
177	1.00,1.00,4.00,1.00,1.00,0.25,0.25,4.00,1.00	559eb41b6bef1	1.4	0.2221	0	1	1	3	0.4577	0.2196	0.3228
178	1.00,0.50,0.50,0.50,2.00,1.00,2.00,2.00,2.00,0.50,1.00,2.00,2.00,0.50,0.50,1.00	559eb3a34ae7f	1.1	0.7481	1	1	0	4	0.1397	0.3873	0.2748	0.1981
179	1.00,3.00,2.00,0.33,1.00,0.50,0.50,2.00,1.00	559eb35aab9a4	1.3	0.9774	1	1	0	3	0.539	0.1638	0.2973
180	1.00,0.33,0.33,0.33,3.00,1.00,3.00,3.00,3.00,0.33,1.00,1.00,3.00,0.33,1.00,1.00	559eb560f0b10	1.1	0.7199	1	1	0	4	0.0979	0.4812	0.2104	0.2104
181	1.00,2.00,2.00,0.50,1.00,1.00,0.50,1.00,1.00	559eb414bdb9b	1.3	1.0000	1	1	0	3	0.5	0.25	0.25
182	1.00,0.33,0.33,3.00,1.00,1.00,3.00,1.00,1.00	559eb3968ff70	1.4	1.0000	1	1	0	3	0.1429	0.4286	0.4286
183	1.00,0.25,0.25,4.00,1.00,1.00,4.00,1.00,1.00	559eb3c3b593d	1.4	1.0000	1	1	0	3	0.1111	0.4444	0.4444
184	1.00,3.00,0.33,2.00,0.33,1.00,1.00,1.00,3.00,1.00,1.00,1.00,0.50,1.00,1.00,1.00	559eb439a9090	1.0	0.2309	0	1	1	4	0.3017	0.1839	0.3218	0.1925
185	1.00,0.33,0.33,3.00,1.00,3.00,3.00,0.33,1.00	559eb3d451778	1.3	0.7472	1	1	0	3	0.1399	0.5736	0.2864
186	1.00,1.00,0.50,3.00,0.50,1.00,1.00,0.50,3.00,0.50,2.00,2.00,1.00,3.00,2.00,0.33,0.33,0.33,1.00,0.33,2.00,2.00,0.50,3.00,1.00	559eb3c91fa37	0	0.8120	1	1	0	5	0.1677	0.1677	0.3354	0.0754	0.2539
187	1.00,2.00,3.00,3.00,4.00,0.50,1.00,2.00,2.00,3.00,0.33,0.50,1.00,2.00,3.00,0.33,0.50,0.50,1.00,2.00,0.25,0.33,0.33,0.50,1.00	559eb3f834454	0	0.8824	1	1	0	5	0.395	0.2393	0.1731	0.1196	0.073
188	1.00,0.25,0.25,0.25,4.00,1.00,0.50,1.00,4.00,2.00,1.00,1.00,4.00,1.00,1.00,1.00	559eb3ddd0c2b	1.1	0.9470	1	1	0	4	0.0759	0.2581	0.3624	0.3036
189	1.00,4.00,0.25,4.00,4.00,0.25,1.00,4.00,1.00,3.00,4.00,0.25,1.00,4.00,3.00,0.25,1.00,0.25,1.00,3.00,0.25,0.33,0.33,0.33,1.00	559eb3f045400	0	0.3677	0	1	2	5	0.2994	0.2384	0.3013	0.1099	0.051
190	1.00,1.00,1.00,1.00,4.00,1.00,1.00,4.00,4.00,4.00,1.00,0.25,1.00,4.00,3.00,1.00,0.25,0.25,1.00,0.33,0.25,0.25,0.33,3.00,1.00	559eb4f3c3239	0	0.6510	1	1	2	5	0.2304	0.3677	0.2058	0.0936	0.1024
191	1.00,4.00,4.00,0.25,1.00,3.00,0.25,0.33,1.00	559eb3e4b7710	1.3	0.7851	1	1	0	3	0.6389	0.2431	0.1181
192	1.00,1.00,2.00,1.00,1.00,0.50,0.50,2.00,1.00	559eb414bdb9b	1.4	0.2913	0	1	1	3	0.4071	0.2643	0.3286
193	1.00,0.50,0.33,2.00,1.00,0.50,3.00,2.00,1.00	559eb35aab9a4	1.4	0.9774	1	1	1	3	0.1638	0.2973	0.539
194	1.00,1.00,0.33,1.00,1.00,0.50,3.00,2.00,1.00	559eb3d451778	1.4	0.9504	1	1	0	3	0.2106	0.2409	0.5485
195	1.00,0.33,0.33,1.00,3.00,1.00,1.00,1.00,3.00,1.00,1.00,3.00,1.00,1.00,0.33,1.00	559eb40060fc5	1.2	0.8353	1	1	1	4	0.1292	0.3042	0.3875	0.1792
196	1.00,2.00,2.00,2.00,0.50,1.00,2.00,2.00,0.50,0.50,1.00,0.50,0.50,0.50,2.00,1.00	559eb3a34ae7f	1.2	0.7481	1	1	0	4	0.3873	0.2748	0.1397	0.1981
197	1.00,3.00,2.00,0.50,0.33,1.00,2.00,0.50,0.50,0.50,1.00,0.50,2.00,2.00,2.00,1.00	559eb3e3dbe27	1.1	0.6355	1	1	0	4	0.302	0.1816	0.1376	0.3788
198	1.00,4.00,4.00,4.00,0.25,1.00,3.00,0.50,0.25,0.33,1.00,2.00,0.25,2.00,0.50,1.00	559eb560f0b10	1.2	0.7914	1	1	0	4	0.5302	0.1747	0.1432	0.1519
199	1.00,4.00,4.00,4.00,0.25,1.00,3.00,3.00,0.25,0.33,1.00,0.33,0.25,0.33,3.00,1.00	559eb3c4d8369	1.1	0.6942	1	1	0	4	0.5302	0.238	0.0831	0.1486
200	1.00,0.25,0.33,4.00,1.00,3.00,3.00,0.33,1.00	559eb3e4b7710	1.4	0.8770	1	1	0	3	0.1199	0.608	0.2721
201	1.00,3.00,2.00,0.50,0.33,1.00,0.50,0.33,0.50,2.00,1.00,0.25,2.00,3.00,4.00,1.00	559eb3ddd0c2b	1.2	0.8310	1	1	0	4	0.2752	0.1062	0.1515	0.4671
202	1.00,1.00,2.00,3.00,1.00,1.00,3.00,1.00,0.50,0.33,1.00,0.50,0.33,1.00,2.00,1.00	559eb4120ed9e	1.0	0.6853	1	1	0	4	0.3621	0.3024	0.1231	0.2124
203	1.00,2.00,2.00,1.00,0.50,1.00,2.00,1.00,0.50,0.50,1.00,3.00,1.00,1.00,0.33,1.00	559eb4012c584	1.0	0.2371	0	1	1	4	0.3299	0.2326	0.2413	0.1962
204	1.00,4.00,1.00,0.25,1.00,3.00,1.00,0.33,1.00	559eb40060fc5	1.3	0.2536	0	1	1	3	0.4648	0.2995	0.2356
205	1.00,3.00,1.00,0.33,1.00,3.00,1.00,0.33,1.00	559eb560f0b10	1.3	0.2492	0	1	1	3	0.4403	0.3245	0.2352
206	1.00,2.00,0.50,0.50,1.00,0.50,2.00,2.00,1.00	559eb3a34ae7f	1.3	0.8227	1	1	0	3	0.3119	0.1976	0.4905
207	1.00,1.00,1.00,1.00,1.00,1.00,1.00,1.00,1.00,1.00,1.00,1.00,1.00,1.00,1.00,1.00	559eb439a9090	1.1	1.0000	1	1	1	4	0.25	0.25	0.25	0.25
208	1.00,4.00,4.00,0.25,1.00,0.25,0.25,4.00,1.00	559eb3ddd0c2b	1.3	0.6912	1	1	0	3	0.6243	0.1085	0.2672
209	1.00,4.00,4.00,3.00,0.25,1.00,0.50,0.50,0.25,2.00,1.00,2.00,0.33,2.00,0.50,1.00	559eb3e3dbe27	1.2	0.8321	1	1	0	4	0.5295	0.1019	0.2082	0.1603
210	1.00,0.25,0.25,4.00,1.00,0.25,4.00,4.00,1.00	559eb3ddd0c2b	1.4	0.6912	1	1	0	3	0.1085	0.2672	0.6243
211	1.00,0.50,2.00,2.00,1.00,2.00,0.50,0.50,1.00	559eb3a34ae7f	1.4	0.8227	1	1	0	3	0.3119	0.4905	0.1976
212	1.00,3.00,0.33,0.33,1.00,3.00,3.00,0.33,1.00	559eb40060fc5	1.4	1.0000	1	1	0	3	0.3333	0.3333	0.3333
213	1.00,4.00,3.00,0.25,1.00,3.00,0.33,0.33,1.00	559eb560f0b10	1.4	0.6447	1	1	0	3	0.6034	0.258	0.1386
214	1.00,4.00,4.00,1.00,0.25,1.00,1.00,0.25,0.25,1.00,1.00,0.25,1.00,4.00,4.00,1.00	559eb4120ed9e	1.1	1.0000	1	1	0	4	0.4	0.1	0.1	0.4
215	1.00,4.00,1.00,1.00,0.25,1.00,0.50,1.00,1.00,2.00,1.00,3.00,1.00,1.00,0.33,1.00	559eb4012c584	1.1	0.6656	1	1	0	4	0.3318	0.1363	0.3527	0.1793
216	1.00,2.00,2.00,0.50,1.00,2.00,0.50,0.50,1.00	559eb3e3dbe27	1.3	0.8227	1	1	0	3	0.4905	0.3119	0.1976
217	1.00,0.33,3.00,3.00,3.00,1.00,3.00,3.00,0.33,0.33,1.00,3.00,0.33,0.33,0.33,1.00	559eb4f3c3239	1.0	0.6529	1	1	1	4	0.2725	0.463	0.1686	0.0959
218	1.00,3.00,3.00,1.00,0.33,1.00,1.00,1.00,0.33,1.00,1.00,1.00,1.00,1.00,1.00,1.00	559eb4120ed9e	1.2	0.7771	1	1	0	4	0.4062	0.1771	0.1771	0.2396
219	1.00,3.00,0.33,3.00,0.33,1.00,3.00,3.00,3.00,0.33,1.00,3.00,0.33,0.33,0.33,1.00	559eb3f045400	1.0	0.4452	0	1	1	4	0.3071	0.3071	0.3071	0.0786
220	1.00,2.00,2.00,2.00,0.50,1.00,0.50,0.50,0.50,2.00,1.00,0.50,0.50,2.00,2.00,1.00	559eb3c9146f9	1.0	0.7481	1	1	1	4	0.3873	0.1397	0.1981	0.2748
221	1.00,4.00,3.00,4.00,0.25,1.00,0.33,0.33,0.33,3.00,1.00,1.00,0.25,3.00,1.00,1.00	559eb439a9090	1.2	0.7844	1	1	1	4	0.5258	0.0856	0.2	0.1886
222	1.00,3.00,1.00,1.00,0.33,1.00,0.50,0.50,1.00,2.00,1.00,1.00,1.00,2.00,1.00,1.00	559eb4012c584	1.2	0.9349	1	1	0	4	0.3116	0.1277	0.2804	0.2804
223	1.00,2.00,2.00,0.50,1.00,2.00,0.50,0.50,1.00	559eb3e3dbe27	1.4	0.8227	1	1	0	3	0.4905	0.3119	0.1976
224	1.00,2.00,3.00,4.00,2.00,0.50,1.00,0.50,3.00,1.00,0.33,2.00,1.00,3.00,1.00,0.25,0.33,0.33,1.00,0.33,0.50,1.00,1.00,3.00,1.00	559eb3d13c0db		0.8503	1	1	0	5	0.3756	0.1678	0.2036	0.0681	0.1849
225	1.00,1.00,3.00,1.00,1.00,1.00,0.33,1.00,1.00	559eb4120ed9e	1.3	0.6844	1	1	0	3	0.454	0.3206	0.2254
226	1.00,1.00,1.00,2.00,1.00,1.00,3.00,0.50,1.00,0.33,1.00,0.50,0.50,2.00,2.00,1.00	559eb41bcadc1	1.0	0.3809	0	1	1	4	0.2898	0.2675	0.1576	0.285
227	1.00,1.00,2.00,1.00,1.00,2.00,0.50,0.50,1.00	559eb4120ed9e	1.4	1.0000	1	1	0	3	0.4	0.4	0.2
228	1.00,3.00,3.00,0.33,1.00,3.00,0.33,0.33,1.00	559eb4012c584	1.3	0.7472	1	1	0	3	0.5736	0.2864	0.1399
229	1.00,1.00,3.00,1.00,1.00,1.00,0.33,1.00,1.00	559eb439a9090	1.3	0.6844	1	1	0	3	0.454	0.3206	0.2254
230	1.00,4.00,4.00,4.00,0.25,1.00,4.00,0.25,0.25,0.25,1.00,0.25,0.25,4.00,4.00,1.00	559eb4f3c3239	1.1	0.5838	0	1	1	4	0.5097	0.151	0.0731	0.2662
231	1.00,3.00,1.00,3.00,0.33,0.33,1.00,3.00,0.33,0.25,1.00,0.33,1.00,3.00,0.33,0.33,3.00,0.33,1.00,2.00,3.00,4.00,3.00,0.50,1.00	559eb3eb979d7	0	0.3494	0	1	2	5	0.2059	0.1227	0.1588	0.2004	0.3123
232	1.00,1.00,0.50,1.00,1.00,0.50,2.00,2.00,1.00	559eb4012c584	1.4	1.0000	1	1	0	3	0.25	0.25	0.5
233	1.00,1.00,1.00,1.00,1.00,0.33,1.00,3.00,1.00	559eb439a9090	1.4	0.6844	1	1	0	3	0.3206	0.2254	0.454
234	1.00,1.00,1.00,1.00,1.00,1.00,0.33,0.50,1.00,3.00,1.00,2.00,1.00,2.00,0.50,1.00	559eb3c91fa37	1.0	0.7624	1	1	1	4	0.242	0.1554	0.369	0.2336
235	1.00,0.33,3.00,1.00,3.00,1.00,1.00,0.33,0.33,1.00,1.00,3.00,1.00,3.00,0.33,1.00	559eb3f045400	1.1	1.0000	1	1	0	4	0.25	0.25	0.25	0.25
236	1.00,1.00,2.00,2.00,1.00,1.00,1.00,2.00,2.00,0.33,0.50,0.50,1.00,0.50,0.50,0.50,0.50,2.00,1.00,0.33,1.00,3.00,2.00,3.00,1.00	559eb3e8272d2		0.6996	1	1	1	5	0.238	0.1959	0.1072	0.1307	0.3282
237	1.00,2.00,2.00,3.00,0.50,1.00,0.50,3.00,0.50,2.00,1.00,4.00,0.33,0.33,0.25,1.00	559eb3c9146f9	1.1	0.8146	1	1	0	4	0.4024	0.202	0.3049	0.0907
238	1.00,4.00,3.00,3.00,0.25,1.00,0.50,2.00,0.33,2.00,1.00,3.00,0.33,0.50,0.33,1.00	559eb3c4d8369	1.2	0.7756	1	1	0	4	0.5023	0.1474	0.2452	0.1052
239	1.00,3.00,3.00,0.25,0.33,1.00,0.25,0.25,0.33,4.00,1.00,0.25,4.00,4.00,4.00,1.00	559eb4f3c3239	1.2	0.6238	1	1	0	4	0.2332	0.0788	0.1641	0.5239
240	1.00,2.00,0.33,0.50,0.50,1.00,0.33,0.50,3.00,3.00,1.00,2.00,2.00,2.00,0.50,1.00	559eaf4cd13ea	1.0	0.8923	1	1	0	4	0.1707	0.1202	0.4495	0.2596
241	1.00,1.00,0.33,0.33,1.00,1.00,0.33,0.33,3.00,3.00,1.00,3.00,3.00,3.00,0.33,1.00	559eb3f045400	1.2	0.7942	1	1	0	4	0.122	0.122	0.4732	0.2827
242	1.00,1.00,2.00,2.00,1.00,1.00,2.00,2.00,0.50,0.50,1.00,1.00,0.50,0.50,1.00,1.00	559eb3f834454	1.0	1.0000	1	1	0	4	0.3333	0.3333	0.1667	0.1667
243	1.00,4.00,4.00,0.25,1.00,4.00,0.25,0.25,1.00	559eb4f3c3239	1.3	0.6912	1	1	0	3	0.6243	0.2672	0.1085
244	1.00,0.33,3.00,3.00,1.00,3.00,0.33,0.33,1.00	559eb3f045400	1.3	0.7472	1	1	0	3	0.2864	0.5736	0.1399
245	1.00,0.25,4.00,4.00,1.00,4.00,0.25,0.25,1.00	559eb4f3c3239	1.4	0.6912	1	1	0	3	0.2672	0.6243	0.1085
246	1.00,4.00,3.00,0.25,1.00,0.50,0.33,2.00,1.00	559eb3c4d8369	1.3	0.9665	1	1	0	3	0.6232	0.1373	0.2395
247	1.00,0.50,0.50,3.00,2.00,1.00,0.50,3.00,2.00,2.00,1.00,3.00,0.33,0.33,0.33,1.00	559eb3c9146f9	1.2	0.8243	1	1	0	4	0.2081	0.2875	0.4063	0.0981
248	1.00,4.00,2.00,0.50,0.25,1.00,0.33,0.33,0.50,3.00,1.00,2.00,2.00,3.00,0.50,1.00	559eb3e8272d2	1.0	0.7932	1	1	1	4	0.3206	0.0829	0.2972	0.2993
249	1.00,3.00,3.00,0.33,1.00,3.00,0.33,0.33,1.00	559eb3f045400	1.4	0.7472	1	1	0	3	0.5736	0.2864	0.1399
250	1.00,0.33,0.33,3.00,1.00,2.00,3.00,0.50,1.00	559eb3c9146f9	1.3	0.8833	1	1	0	3	0.1416	0.5247	0.3338
251	1.00,3.00,3.00,0.33,1.00,0.33,0.33,3.00,1.00	559eb3c4d8369	1.4	0.7472	1	1	0	3	0.5736	0.1399	0.2864
252	1.00,2.00,0.50,1.00,0.50,1.00,0.33,0.33,2.00,3.00,1.00,0.50,1.00,3.00,2.00,1.00	559eb41bcadc1	1.1	0.8379	1	1	0	4	0.232	0.1067	0.3038	0.3576
253	1.00,3.00,0.50,1.00,3.00,0.33,1.00,0.33,0.33,1.00,2.00,3.00,1.00,1.00,3.00,1.00,3.00,1.00,1.00,2.00,0.33,1.00,0.33,0.50,1.00	559eb3e46e6cb	0	0.9232	1	1	0	5	0.2412	0.0909	0.3156	0.2527	0.0996
254	1.00,1.00,1.00,1.00,1.00,1.00,1.00,0.50,1.00,1.00,1.00,0.50,1.00,2.00,2.00,1.00	559eb3d13c0db	1.0	0.7604	1	1	0	4	0.2458	0.2042	0.2042	0.3458
255	1.00,0.50,0.50,2.00,1.00,0.50,2.00,2.00,1.00	559eb3c9146f9	1.4	0.8227	1	1	0	3	0.1976	0.3119	0.4905
256	1.00,0.25,0.33,0.33,4.00,1.00,2.00,2.00,3.00,0.50,1.00,2.00,3.00,0.50,0.50,1.00	559eb3e8272d2	1.1	0.9142	1	1	0	4	0.0879	0.4262	0.2827	0.2032
257	1.00,0.50,1.00,1.00,2.00,1.00,1.00,1.00,1.00,1.00,1.00,1.00,1.00,1.00,1.00,1.00	559eb3c91fa37	1.1	0.4950	0	1	1	4	0.2107	0.2964	0.2464	0.2464
258	1.00,0.50,1.00,2.00,2.00,1.00,2.00,2.00,1.00,0.50,1.00,2.00,0.50,0.50,0.50,1.00	559eb3d13c0db	1.1	0.8174	1	1	0	4	0.2325	0.3937	0.2325	0.1413
259	1.00,2.00,3.00,2.00,0.50,1.00,3.00,3.00,0.33,0.33,1.00,3.00,0.50,0.33,0.33,1.00	559eb3e8272d2	1.2	0.6069	1	1	0	4	0.4013	0.3074	0.1759	0.1154
260	1.00,2.00,2.00,0.50,1.00,2.00,0.50,0.50,1.00	559eb3e8272d2	1.3	0.8227	1	1	0	3	0.4905	0.3119	0.1976
261	1.00,2.00,1.00,1.00,0.50,1.00,0.50,0.50,1.00,2.00,1.00,1.00,1.00,2.00,1.00,1.00	559eb3d13c0db	1.2	1.0000	1	1	0	4	0.2857	0.1429	0.2857	0.2857
262	1.00,0.50,0.50,2.00,1.00,0.50,2.00,2.00,1.00	559eb3e8272d2	1.4	0.8227	1	1	0	3	0.1976	0.3119	0.4905
263	1.00,2.00,1.00,2.00,0.50,1.00,1.00,2.00,1.00,1.00,1.00,2.00,0.50,0.50,0.50,1.00	559eb3e46e6cb	1.0	0.8395	1	1	0	4	0.3373	0.2401	0.2817	0.1409
264	1.00,3.00,2.00,0.33,1.00,0.33,0.50,3.00,1.00	559eb3d13c0db	1.3	0.8833	1	1	0	3	0.5247	0.1416	0.3338
265	1.00,1.00,0.50,1.00,1.00,0.50,2.00,2.00,1.00	559eb3d13c0db	1.4	1.0000	1	1	0	3	0.25	0.25	0.5
266	1.00,2.00,1.00,0.50,0.50,1.00,0.33,0.50,1.00,3.00,1.00,3.00,2.00,2.00,0.33,1.00	559eb41bcadc1	1.2	0.6620	1	1	0	4	0.2368	0.1153	0.3931	0.2549
267	1.00,1.00,2.00,2.00,1.00,1.00,2.00,2.00,0.50,0.50,1.00,2.00,0.50,0.50,0.50,1.00	559eb3e46e6cb	1.1	0.8515	1	1	0	4	0.329	0.329	0.2002	0.1418
268	1.00,1.00,0.50,0.50,1.00,1.00,1.00,0.50,2.00,1.00,1.00,1.00,2.00,2.00,1.00,1.00	559eb3c91fa37	1.2	0.8352	1	1	1	4	0.169	0.2048	0.2881	0.3381
269	1.00,3.00,1.00,2.00,0.33,1.00,0.50,0.50,1.00,2.00,1.00,2.00,0.50,2.00,0.50,1.00	559eaf4cd13ea	1.1	0.9119	1	1	0	4	0.3562	0.1251	0.325	0.1937
270	1.00,2.00,3.00,1.00,0.50,1.00,0.50,0.50,0.33,2.00,1.00,0.33,1.00,2.00,3.00,1.00	559eb3e46e6cb	1.2	0.7638	1	1	0	4	0.3479	0.1406	0.1636	0.3479
271	1.00,4.00,3.00,0.25,1.00,0.33,0.33,3.00,1.00	559eb3c91fa37	1.3	0.8770	1	1	0	3	0.608	0.1199	0.2721
272	1.00,2.00,1.00,0.50,1.00,1.00,1.00,1.00,1.00	559eb3c91fa37	1.4	0.6733	1	1	0	3	0.4111	0.2611	0.3278
273	1.00,4.00,2.00,3.00,0.25,1.00,0.33,0.50,0.50,3.00,1.00,2.00,0.33,2.00,0.50,1.00	559eaf4cd13ea	1.2	0.9562	1	1	0	4	0.4658	0.096	0.2771	0.1611
274	1.00,2.00,0.33,0.50,1.00,0.33,3.00,3.00,1.00	559eb41bcadc1	1.3	0.8823	1	1	0	3	0.2519	0.1593	0.5889
275	1.00,1.00,2.00,1.00,1.00,1.00,0.50,1.00,1.00	559eb3e46e6cb	1.3	0.6733	1	1	0	3	0.4111	0.3278	0.2611
276	1.00,0.33,0.50,3.00,1.00,3.00,2.00,0.33,1.00	559eaf4cd13ea	1.3	0.8823	1	1	0	3	0.1593	0.5889	0.2519
277	1.00,0.50,0.50,2.00,1.00,3.00,2.00,0.33,1.00	559eb3e46e6cb	1.4	0.6831	1	1	0	3	0.1946	0.5374	0.268
278	1.00,1.00,0.33,1.00,1.00,0.33,3.00,3.00,1.00	559eaf4cd13ea	1.4	1.0000	1	1	0	3	0.2	0.2	0.6
279	1.00,1.00,2.00,1.00,1.00,3.00,0.50,0.33,1.00	559eb41bcadc1	1.4	0.9503	1	1	0	3	0.3873	0.4429	0.1698
280	1.00,2.00,2.00,4.00,0.50,1.00,1.00,3.00,0.50,1.00,1.00,3.00,0.25,0.33,0.33,1.00	559eb3eb979d7	1.0	0.9545	1	1	0	4	0.4328	0.2391	0.2391	0.089
281	1.00,3.00,2.00,2.00,0.33,1.00,2.00,2.00,0.50,0.50,1.00,1.00,0.50,0.50,1.00,1.00	559eb3f834454	1.1	0.6634	1	1	0	4	0.4238	0.2524	0.1619	0.1619
282	1.00,0.33,2.00,4.00,3.00,1.00,3.00,3.00,0.50,0.33,1.00,1.00,0.25,0.33,1.00,1.00	559eb3eb979d7	1.1	0.7329	1	1	0	4	0.2768	0.4734	0.1315	0.1183
283	1.00,1.00,2.00,2.00,1.00,1.00,2.00,2.00,0.50,0.50,1.00,1.00,0.50,0.50,1.00,1.00	559eb3f834454	1.2	1.0000	1	1	0	4	0.3333	0.3333	0.1667	0.1667
284	1.00,2.00,2.00,0.50,1.00,1.00,0.50,1.00,1.00	559eb3f834454	1.3	1.0000	1	1	0	3	0.5	0.25	0.25
285	1.00,1.00,2.00,2.00,1.00,1.00,0.33,0.33,0.50,3.00,1.00,2.00,0.50,3.00,0.50,1.00	559eb3eb979d7	1.2	0.4252	0	1	1	4	0.3388	0.1519	0.2944	0.2149
286	1.00,1.00,1.00,1.00,1.00,1.00,1.00,1.00,1.00	559eb3f834454	1.4	1.0000	1	1	0	3	0.3333	0.3333	0.3333
287	1.00,0.50,0.50,2.00,1.00,1.00,2.00,1.00,1.00	559eb3eb979d7	1.3	1.0000	1	1	0	3	0.2	0.4	0.4
288	1.00,1.00,4.00,1.00,1.00,1.00,0.25,1.00,1.00	559eb3eb979d7	1.4	0.6951	1	1	0	3	0.4815	0.3148	0.2037
289	1.00,0.50,0.50,0.50,0.50,2.00,1.00,1.00,2.00,0.50,2.00,1.00,1.00,2.00,1.00,2.00,0.50,0.50,1.00,0.50,2.00,2.00,1.00,2.00,1.00	559ebb5462e9e	0	0.7940	1	1	1	5	0.1091	0.2163	0.2449	0.1447	0.2849
290	1.00,3.00,3.00,2.00,0.33,1.00,1.00,0.50,0.33,1.00,1.00,0.50,0.50,2.00,2.00,1.00	559ebb5462e9e	1.0	0.9829	1	1	0	4	0.4547	0.1411	0.1411	0.263
291	1.00,0.50,0.50,0.50,2.00,1.00,2.00,1.00,2.00,0.50,1.00,2.00,2.00,1.00,0.50,1.00	559ebb5462e9e	1.1	0.6537	1	1	0	4	0.1364	0.3353	0.2867	0.2416
292	1.00,0.33,2.00,0.50,3.00,1.00,3.00,3.00,0.50,0.33,1.00,0.50,2.00,0.33,2.00,1.00	559ebb5462e9e	1.2	0.8222	1	1	1	4	0.1676	0.4841	0.1171	0.2311
293	1.00,3.00,3.00,0.33,1.00,0.50,0.33,2.00,1.00	559ebb5462e9e	1.3	0.8823	1	1	0	3	0.5889	0.1593	0.2519
294	1.00,3.00,3.00,0.33,1.00,3.00,0.33,0.33,1.00	559ebb5462e9e	1.4	0.7472	1	1	0	3	0.5736	0.2864	0.1399
					0.146259		0.278912

## Sheet: Matriz_projetos_original
		PROJETOS-ÂNCORA					ÁREAS DE INTERVENÇÃO & OBJETIVOS ESTRATÉGICOS
			Economia				Património natural				Território, centralidade e marca				Inclusão social			+ Qualidade de vida
			1.2. Prepara economia do futuro	1.3. Qualificação mão-de-obra necessidades atuais	1.2. Serviços do presente	1.5. Serviços e infraestruturas de apoio à atividade económica	5.1. Prevenção e mitigação de riscos (erosão, incêndios, cheias)	5.2. Patrimonio natural na otica da utilização para turismo	5.3. Patrimonio natural na otica da Utilização para lazer	5.4. Preservação de ecossistemas/limpeza/embelezamento (qualificação ambiental)	2.1. Acessibilidade e mobilidade	2.2. Afirmação da identidade territorial	2.3. Património construído	2.4. Qualidade do espaço público	3.1. Saúde e educação	3.2. Apoio a grupos vulneráveis	3.3. Inserção socioprofissional	4.2. Desporto e lazer	4.3. Cultura	4.4. Participação cívica
		Regeneração Urbana	0.875	0.0625	0.5625	0.5	0.125	0.4375	0.5	0.625	1.1875	1.625	2.0625	2.8125	0.625	1.0625	0.3125	1.8125	1.1875	0.75	17.125	0.635731
	1	Definição de critérios para as operações e obras de reabilitação e de mecanismos de incentivo ao investimento	1	0	1	0	0	0	0	1	0	1	6	6	0	2	0	1	1	1	21	0.779582
		Impacto	1		1					1		1	2	2		2		1	1	1	13
		Intensidade	1		1					1		1	3	3		1		1	1	1	14
	2	Organização e formalização de um gabinete de gestão urbanística norteador, que permita o controlo prévio das operações urbanísticas a realizar ao abrigo de cada ARU	2	0	1	2	0	0	0	0	2	1	4	4	0	1	0	1	1	0	19	0.705336
		Impacto	1		1	1					1	1	2	2		1		1	1		12
		Intensidade	2		1	2					2	1	2	2		1		1	1		15
	3	Conservação, proteção e valorização do património construído	2	1	1	0	0	0	1	0	0	6	6	1	1	4	1	2	4	0	30	1.11369
		Impacto	1	1	1				1			2	2	1	1	2	1	1	2		16
		Intensidade	2	1	1				1			3	3	1	1	2	1	2	2		20
	4	Reabilitação funcional do espaço público	0	0	0	0	0	1	1	1	6	4	2	6	2	6	0	4	2	1	36	1.33643
		Impacto						1	1	1	2	2	1	2	1	2		2	1	1	17
		Intensidade						1	1	1	3	2	2	3	2	3		2	2	1	23
	5	Revitalização, animação e valorização dos espaços públicos de circulação e/ou permanência - comum às ARU	0	0	0	0	0	0	0	0	1	6	1	4	2	2	1	4	4	4	29	1.07657
		Impacto									1	2	1	2	1	1	1	2	2	2	15
		Intensidade									1	3	1	2	2	2	1	2	2	2	18
	6	Qualificação e monitorização do sistema de drenagem de águas residuais domésticas e pluviais - Gafanha da Nazaré	0	0	0	0	2	0	0	2	0	0	2	2	1	0	0	0	0	0	9	0.334107
		Impacto					2			1			2	2	1						8
		Intensidade					1			2			1	1	1						6
	7	Acompanhamento dos processos de gestão da qualidade do ar	2	0	1	2	0	0	0	2	0	0	0	0	1	0	0	0	0	0	8	0.296984
		Impacto	1		1	2				2					1						7
		Intensidade	2		1	1				1					1						6
	8	Qualificação ambiental e urbana da zona portuária da Gafanha da Nazaré	2	0	1	2	0	0	1	2	0	0	1	1	0	0	0	0	0	0	10	0.37123
		Impacto	1		1	2			1	2			1	1							9
		Intensidade	2		1	1			1	1			1	1							8
	9	Revitalização e valorização dos espaços públicos de circulação e/ou permanência - Gafanha da Nazaré	0	0	0	0	0	0	0	0	0	2	1	2	1	1	1	4	2	4	18	0.668213
		Impacto										2	1	2	1	1	1	2	2	2	14
		Intensidade										1	1	1	1	1	1	2	1	2	11
	10	Articulação com o Projeto Aldeamento Turístico da Vista Alegre, procurando integrar as intervenções de reabilitação do Teatro, do Largo e dos arruamentos circundantes que servem o Complexo do antigo Bairro Operário	2	0	1	0	0	0	1	0	0	4	4	4	0	0	0	2	4	0	22	0.816705
		Impacto	1		1				1			2	2	2				1	2		12
		Intensidade	2		1				1			2	2	2				2	2		14
	11	Articulação das redes urbanas pedonais e cicláveis com as vias deste núcleo, de forma a garantir a plena integração deste na área urbana do Município - Vista Alegre	2	0	1	0	0	0	0	0	4	0	1	4	1	0	0	2	0	0	15	0.556845
		Impacto	1		1						2		1	2	1			2			10
		Intensidade	2		1						2		1	2	1			1			10
	12	Articulação da rede pedonal estruturante do aglomerado com o percurso pedestre, como previsto no PIMTRA - Costa Nova e Barra	0	0	0	0	0	4	4	2	4	1	0	4	1	0	0	4	0	0	24	0.890951
		Impacto						2	2	1	2	1		2	1			2			13
		Intensidade						2	2	2	2	1		2	1			2			14
	13	Intervenção no sentido de suavizar o impacto visual negativo causado pela orientação do edificado (com as traseiras viradas a poente), nomeadamente através de iniciativas de arte urbana, procurando tornar mais aprazível a passagem de quem circula sobre o passadiço ao longo do cordão dunar	0	0	0	0	0	2	0	0	0	0	1	2	0	0	0	2	0	0	7	0.259861
		Impacto						1					1	2				1			5
		Intensidade						2					1	1				2			6
	14	Dinamização do mercado tradicional da Costa Nova e implementação do projeto de reconversão do Mercado da Barra	1	0	2	2	0	0	0	0	0	1	2	1	0	0	2	1	1	0	13	0.482599
		Impacto	1		1	2						1	2	1			1	1	1		11
		Intensidade	1		2	1						1	1	1			2	1	1		11
	15	Requalificação urbana para resolver o acolhimento das autocaravanas nas praias da Barra e Costa Nova	0	0	0	0	0	0	0	0	2	0	0	2	0	0	0	2	0	0	6	0.222738
		Impacto									2			2				2			6
		Intensidade									1			1				1			3
	16	Requalificação urbana do Bairro dos Pescadores da Costa Nova	0	0	0	0	0	0	0	0	0	0	2	2	0	1	0	0	0	2	7	0.259861
		Impacto											2	2		1				1	6
		Intensidade											1	1		1				2	5
		Cultura e Criatividade	2	0.5	2	0.5	0	0.5	0.5	0	0	5	0.5	0.75	1.75	0.75	0.75	2.5	5.5	4.5	28	1.03944
	1	Promover a cooperação institucional e territorial visando ampliar e qualificar a oferta de programas culturais	1	0	1	0	0	0	0	0	0	4	0	0	1	1	0	4	6	6	24	0.890951
		Impacto	1		1							2			1	1		2	2	2	12
		Intensidade	1		1							2			1	1		2	3	3	14
	2	Projetar a identidade cultural ilhavense à escala local, regional e internacional	2	0	4	0	0	0	0	0	0	6	0	0	1	0	0	2	4	4	23	0.853828
		Impacto	2		2							2			1			2	2	2	13
		Intensidade	1		2							3			1			1	2	2	12
	3	Salvaguardar, valorizar e revitalizar os elementos imateriais do património cultural municipal, como reforço da identidade social e cultural	1	0	2	0	0	2	2	0	0	6	2	3	1	0	2	4	6	4	35	1.2993
		Impacto	1		1			1	1			2	1	1	1		1	2	2	2	16
		Intensidade	1		2			2	2			3	2	3	1		2	2	3	2	25
	4	Apostar na formação artística profissional em vários domínios, de forma articulada com a Universidade de Aveiro, enquanto centro de conhecimento	4	2	1	2	0	0	0	0	0	4	0	0	4	2	1	0	6	4	30	1.11369
		Impacto	2	2	1	2						2			2	2	1		2	2	18
		Intensidade	2	1	1	1						2			2	1	1		3	2	16
		Ílhavo Inteligente	1.5	0	1.5	0.5	0	0.5	0.5	0.25	2	1	0	0.25	2.5	2.5	1	2.5	2.5	1.5	20.5	0.761021
	1	Implementação/adaptação de um modelo municipal integrado, baseado na organização interna de informação e na interoperabilidade orientada para a prestação dos serviços públicos	2	0	2	0	0	0	0	0	1	0	0	0	2	2	1	2	2	0	14	0.519722
		Impacto	1		1						1				1	1	1	1	1		8
		Intensidade	2		2						1				2	2	1	2	2		14
	2	Desenvolvimento de uma rede de ligação entre a Administração Pública, o cidadão e as empresas	4	0	4	0	0	0	0	0	1	2	0	0	4	4	2	4	4	6	35	1.2993
		Impacto	2		2						1	2			2	2	1	2	2	2	18
		Intensidade	2		2						1	1			2	2	2	2	2	3	19
	3	Desenvolvimento de soluções de suporte ao transporte público integrado	0	0	0	2	0	2	2	1	6	2	0	1	4	4	1	4	4	0	33	1.22506
		Impacto				2		1	1	1	2	1		1	2	2	1	2	2		18
		Intensidade				1		2	2	1	3	2		1	2	2	1	2	2		21
		Ílhavo Inclusivo	1.5	1	0.75	0.75	1	0	0.25	0.75	2.5	1	2.5	2	4.5	4.5	1.25	4.5	2.5	1.5	32.75	1.21578
	1	Desenvolver estudos demográficos prospetivos – e respetiva atualização – para conhecer em permanência a dimensão e a estrutura etária da população, assim como a sua composição socioeconómica	2	0	2	0	0	0	0	0	2	0	2	2	3	3	3	3	1	0	1.35714	0.0503812
		Impacto	1		1						1		1	1	1	1	1	1	1
		Intensidade	2		2						2		2	2	3	3	3	3	1
	2	Monitorizar a oferta localizada de equipamentos escolares, de saúde, desportivos e sociais, assim como os respetivos usos	0	0	0	0	0	0	0	0	2	0	2	2	3	3	0	3	1	1	1.21429	0.0450779
		Impacto							1		1		1	1	1	1		1	1	1
		Intensidade									2		2	2	3	3		3	1	1
	3	Proceder ao redimensionamento e adequação dos equipamentos de utilização coletiva, com base nos estudos elaborados nos pontos anteriores	0	0	0	1	0	0	0	1	2	0	2	2	6	6	0	6	4	1	2.14286	0.0795492
		Impacto				1				1	1		1	1	2	2		2	2	1
		Intensidade				1				1	2		2	2	3	3		3	2	1
	4	Otimizar a utilização dos equipamentos de utilização coletiva, assegurando uma rede integrada de serviços de interesse geral (SIG), com base nos estudos elaborados	4	4	1	2	4	0	1	2	4	4	4	2	6	6	2	6	4	4	3.5	0.12993
		Impacto	2	2	1	1	2		1	1	2	2	2	1	2	2	2	2	2	2
		Intensidade	2	2	1	2	2		1	2	2	2	2	2	3	3	1	3	2	2
		Parque Central de Ílhavo	0	0	0.5	0.25	0.25	1.5	2.25	1.25	1	3.25	0.25	2.5	3.25	1.5	0.75	4.5	1	2.25	26.25	0.974478
	1	Definição de um modelo de gestão sustentável em função dos agentes envolvidos e dos usos previstos no Plano de Intervenção em Espaço Rural (PIER)	0	0	1	0	1	2	3	1	2	3	0	3	3	1	0	3	1	4	28	1.03944
		Impacto			1		1	1	1	1	1	1		1	1	1		1	1	2	14
		Intensidade			1		1	2	3	1	2	3		3	3	1		3	1	2	26
	2	Requalificação da área da ex-Colónia Agrícola da Gafanha: construção do Parque Municipal de Desporto e Lazer da Senhora dos Campos	0	0	1	0	0	4	6	4	2	4	1	4	4	2	2	6	2	2	44	1.63341
		Impacto			1			2	2	2	2	2	1	2	2	2	2	2	2	1	25
		Intensidade			1			2	3	2	1	2	1	2	2	1	1	3	1	2	24
	3	Identificar as ações e atividades com potencial para a dinamização da área de intervenção	0	0	0	1	0	0	0	0	0	2	0	2	2	1	1	3	1	1	14	0.519722
		Impacto				1						1		1	1	1	1	1	1	1	9
		Intensidade				1						2		2	2	1	1	3	1	1	14
	4	Dinamizar, de forma articulada com outros equipamentos desportivos, as estruturas desportivas do Parque Central de Ílhavo, em conjugação com o projeto Ílhavo um Município inclusivo	0	0	0	0	0	0	0	0	0	4	0	1	4	2	0	6	0	2	19	0.705336
		Impacto										2		1	2	2		2		2	11
		Intensidade										2		1	2	1		3		1	10
		Mar e Ria	3	0	1.5	0.5	3	3	3	3	1	6	0	1.5	1.5	0	0	4	1.5	4	36.5	1.35499
	1	Dinamizar a reformulação de uma estratégia de intervenção para a Ria de Aveiro e acompanhar a sua implementação	2	0	1	0	3	3	3	3	2	6	0	3	2	0	0	2	1	4	35	1.2993
		Impacto	1		1		1	1	1	1	1	2		1	1			1	1	2	15
		Intensidade	2		1		3	3	3	3	2	3		3	2			2	1	2	30
	2	Consubstanciar uma estratégia e um modelo de gestão que articulem as responsabilidades dos diversos agentes e entidades que intervêm no território da Ria	4	0	2	1	3	3	3	3	0	6	0	0	1	0	0	6	2	4	38	1.41067
		Impacto	2		2	1	1	1	1	1		2			1			2	2	2	18
		Intensidade	2		1	1	3	3	3	3		3			1			3	1	2	26
		Turismo de Futuro	1.5	2	3	3	0.5	4.5	3.5	1.5	1.5	4.5	2	3	1	0	0	4.5	4.5	1.5	42	1.55916
	1	Realizar estudos de pesquisa de segmentos de mercado e nichos, para definir estrategicamente os públicos-alvo e o modo de os alcançar e atrair	1	2	2	2	1	3	3	1	1	3	2	2	1	0	0	3	3	1	31	1.15081
		Impacto	1	1	1	1	1	1	1	1	1	1	1	1	1			1	1	1	16
		Intensidade	1	2	2	2	1	3	3	1	1	3	2	2	1			3	3	1	31
	2	Definir as ações e as medidas para adequar a oferta turística do Município aos diferentes públicos-alvo estratégicos a atrair	2	2	4	4	0	6	4	2	2	6	2	4	1	0	0	6	6	2	53	1.96752
		Impacto	2	1	2	2		2	2	1	2	2	2	2	1			2	2	2	27
		Intensidade	1	2	2	2		3	2	2	1	3	1	2	1			3	3	1	29
		Valorização de Capital Humano	5	5	4	3	1	0	0	1	0.5	0.5	0.5	0	2.5	0	3.25	0	0	1	27.25	1.0116
	1	Apostar em instrumentos de articulação do plano de valorização de capital humano com os Municípios vizinhos e ao nível da CIRA, através de um modelo de monitorização	4	6	4	2	0	0	0	0	0	0	0	0	2	0	2	0	0	0	20	0.742459
		Impacto	2	2	2	1									2		2				11
		Intensidade	2	3	2	2									1		1				11
	2	Identificar as necessidades atuais e futuras de conhecimento especializado adequadas ao tecido produtivo do Município	6	6	4	2	1	0	0	1	0	0	0	0	2	0	3	0	0	0	25	0.928074
		Impacto	2	2	2	1	1			1					1		1				11
		Intensidade	3	3	2	2	1			1					2		3				17
	3	Desenvolver um plano integrado de valorização de capital humano, visando a formação de recursos humanos adequados às necessidades do tecido produtivo	4	6	4	4	0	0	0	0	0	0	0	0	4	0	6	0	0	2	30	1.11369
		Impacto	2	2	2	2									2		2			1	13
		Intensidade	2	3	2	2									2		3			2	16
	4	Promover a ligação ao Sistema Científico e Tecnológico, fortalecendo as sinergias entre os centros de conhecimento, as unidades para transferência de tecnologia e as empresas, garantindo as dinâmicas de funcionamento em rede ao nível da Região	6	2	4	4	3	0	0	3	2	2	2	0	2	0	2	0	0	2	34	1.26218
		Impacto	2	1	2	2	1			1	1	1	1		1		1			1	15
		Intensidade	3	2	2	2	3			3	2	2	2		2		2			2	27
		Economia + Competitiva	4.25	1.5	4.25	4	0	0	0	0.25	1	1.5	0	0	0.5	0	1	0	0	0.25	18.5	0.686775
	1	Definir cenários económicos de desenvolvimento setorial, articulando o dinamismo recente na criação de emprego e as atividades económicas de futuro	6	6	6	2	0	0	0	0	0	4	0	0	2	0	2	0	0	1	29	1.07657
		Impacto	2	2	2	1						2			1		1			1	12
		Intensidade	3	3	3	2						2			2		2			1	18
	2	Otimizar e dinamizar as estruturas físicas de suporte ao tecido económico, definindo a vocação dos polos empresariais e industriais	4	0	4	6	0	0	0	0	0	1	0	0	0	0	0	0	0	0	15	0.556845
		Impacto	2		2	2						1									7
		Intensidade	2		2	3						1									8
	3	Definir a função dos eixos viários estruturantes de suporte ao desenvolvimento do tecido produtivo, enquadrando Ílhavo numa perspetiva regional	1	0	1	6	0	0	0	1	4	0	0	0	0	0	0	0	0	0	13	0.482599
		Impacto	1		1	2				1	2										7
		Intensidade	1		1	3				1	2										8
	4	Criação de incentivos para captação de investimento e novas empresas, assim como para a preservação e ajustamento das empresas já existentes	6	0	6	2	0	0	0	0	0	1	0	0	0	0	2	0	0	0	17	0.63109
		Impacto	2		2	2						1					1				8
		Intensidade	3		3	1						1					2				10
		Ílhavo e o Porto de Aveiro	4	0.5	2.5	2	0.5	1	0.5	0.5	0	3	1	2	1	0	1	0.5	0.5	0	20.5	0.761021
	1	Potenciar o Porto de Aveiro enquanto polo dinamizador da economia local e regional e gerador de emprego qualificado	6	1	4	2	0	0	0	0	0	2	0	0	1	0	2	0	1	0	0.428571
		Impacto	2	1	2	2						1			1		2		1
		Intensidade	3	1	2	1						2			1		1		1
	2	Enquadrar a área do Porto de Aveiro e sua envolvente	2	0	1	2	1	2	1	1	0	4	2	4	1	0	0	1	0	0	1.21429
		Impacto	1		1	2	1	2	1	1		2	2	2	1			1
		Intensidade	2		1	1	1	1	1	1		2	1	2	1			1
			23.625	10.5625	20.5625	15	6.375	11.4375	11	9.125	10.6875	27.375	8.8125	14.8125	19.125	10.3125	9.3125	24.8125	19.1875	17.25	26.9375	1	0.445094
		cópia da tabela anterior
		Regeneração Urbana	0.875	0.0625	0.5625	0.5	0.125	0.4375	0.5	0.625	1.1875	1.625	2.0625	2.8125	0.625	1.0625	0.3125	1.8125	1.1875	0.75	0.901316
		Cultura e Criatividade	2	0.5	2	0.5		0.5	0.5			5	0.5	0.75	1.75	0.75	0.75	2.5	5.5	4.5	1.47368
		Ílhavo Inteligente	1.5		1.5	0.5		0.5	0.5	0.25	2	1		0.25	2.5	2.5	1	2.5	2.5	1.5	1.07895
		Ílhavo Inclusivo	1.5	1	0.75	0.75	1		0.25	0.75	2.5	1	2.5	2	4.5	4.5	1.25	4.5	2.5	1.5	1.72368
		Parque Central de Ílhavo			0.5	0.25	0.25	1.5	2.25	1.25	1	3.25	0.25	2.5	3.25	1.5	0.75	4.5	1	2.25	1.38158
		Mar e Ria	3		1.5	0.5	3	3	3	3	1	6		1.5	1.5			4	1.5	4	1.92105
		Turismo de Futuro	1.5	2	3	3	0.5	4.5	3.5	1.5	1.5	4.5	2	3	1			4.5	4.5	1.5	2.21053
		Valorização de Capital Humano	5	5	4	3	1			1	0.5	0.5	0.5		2.5		3.25			1	1.43421
		Economia + Competitiva	4.25	1.5	4.25	4				0.25	1	1.5			0.5		1			0.25	0.973684
		Ílhavo e o Porto de Aveiro	4	0.5	2.5	2	0.5	1	0.5	0.5		3	1	2	1		1	0.5	0.5		1.07895
		Nível 0	0.2112	0.2112	0.2112	0.2112	0.1964	0.1964	0.1964	0.1964	0.1745	0.1745	0.1745	0.1745	0.2067	0.2067	0.2067	0.2112	0.2112	0.2112					projeto * nivel1
		Nível 1	0.284	0.2172	0.2222	0.2766	0.2678	0.238	0.2253	0.2689	0.3113	0.2313	0.2354	0.2221	0.3937	0.3054	0.3009	0.2983	0.3311	0.3706			Media se todos criterios valessem o mesmo		Racio de redestribuição					resultados exercicio
		Regeneração Urbana	0.875	0.0625	0.5625	0.5	0.125	0.4375	0.5	0.625	1.1875	1.625	2.0625	2.8125	0.625	1.0625	0.3125	1.8125	1.1875	0.75	2.79406		2.86962		1.39751						0.2112	0.1964	0.1745	0.2067	0.2112
		Cultura e Criatividade	2	0.5	2	0.5		0.5	0.5			5	0.5	0.75	1.75	0.75	0.75	2.5	5.5	4.5	4.20705		4.17569		0.960395						0.284	0.2172	0.2222	0.2766
		Ílhavo Inteligente	1.5		1.5	0.5		0.5	0.5	0.25	2	1		0.25	2.5	2.5	1	2.5	2.5	1.5	3.5958		3.53822		1.13343						0.2678	0.238	0.2253	0.2689
		Ílhavo Inclusivo	1.5	1	0.75	0.75	1		0.25	0.75	2.5	1	2.5	2	4.5	4.5	1.25	4.5	2.5	1.5	5.61147		5.6139		0.714355						0.3113	0.2313	0.2354	0.2221
		Parque Central de Ílhavo			0.5	0.25	0.25	1.5	2.25	1.25	1	3.25	0.25	2.5	3.25	1.5	0.75	4.5	1	2.25	4.01213		4.11147		0.975398						0.3937	0.3054	0.3009
		Mar e Ria	3		1.5	0.5	3	3	3	3	1	6		1.5	1.5			4	1.5	4	5.81635		5.91939		0.677488						0.2983	0.3311	0.3706
		Turismo de Futuro	1.5	2	3	3	0.5	4.5	3.5	1.5	1.5	4.5	2	3	1			4.5	4.5	1.5	6.31384		6.42778		0.623903
		Valorização de Capital Humano	5	5	4	3	1			1	0.5	0.5	0.5		2.5		3.25			1	3.21177		3.11493		1.28745
		Economia + Competitiva	4.25	1.5	4.25	4				0.25	1	1.5			0.5		1			0.25	1.2662		1.26826		3.16206
		Ílhavo e o Porto de Aveiro	4	0.5	2.5	2	0.5	1	0.5	0.5		3	1	2	1		1	0.5	0.5		3.00401		3.06389		1.3089
																					3.98327		4.01031		1.22409
		Regeneração Urbana	1.22282	0.0873443	0.786098	0.698754	0.174689	0.61141	0.698754	0.873443	1.65954	2.27095	2.88236	3.93049	0.873443	1.48485	0.436721	2.53298	1.65954	1.04813
		Cultura e Criatividade	1.92079	0.480197	1.92079	0.480197		0.480197	0.480197			4.80197	0.480197	0.720296	1.68069	0.720296	0.720296	2.40099	5.28217	4.32178
		Ílhavo Inteligente	1.70014		1.70014	0.566713		0.566713	0.566713	0.283357	2.26685	1.13343		0.283357	2.83357	2.83357	1.13343	2.83357	2.83357	1.70014
		Ílhavo Inclusivo	1.07153	0.714355	0.535766	0.535766	0.714355		0.178589	0.535766	1.78589	0.714355	1.78589	1.42871	3.2146	3.2146	0.892943	3.2146	1.78589	1.07153
		Parque Central de Ílhavo			0.487699	0.243849	0.243849	1.4631	2.19465	1.21925	0.975398	3.17004	0.243849	2.43849	3.17004	1.4631	0.731548	4.38929	0.975398	2.19465
		Mar e Ria	2.03246		1.01623	0.338744	2.03246	2.03246	2.03246	2.03246	0.677488	4.06493		1.01623	1.01623			2.70995	1.01623	2.70995
		Turismo de Futuro	0.935855	1.24781	1.87171	1.87171	0.311952	2.80756	2.18366	0.935855	0.935855	2.80756	1.24781	1.87171	0.623903			2.80756	2.80756	0.935855
		Valorização de Capital Humano	6.43726	6.43726	5.1498	3.86235	1.28745			1.28745	0.643726	0.643726	0.643726		3.21863		4.18422			1.28745
		Economia + Competitiva	13.4388	4.74309	13.4388	12.6483				0.790516	3.16206	4.74309			1.58103		3.16206			0.790516
		Ílhavo e o Porto de Aveiro	5.23559	0.654449	3.27224	2.6178	0.654449	1.3089	0.654449	0.654449		3.92669	1.3089	2.6178	1.3089		1.3089	0.654449	0.654449
																							Case-A_Alternatives	Order	Rank
		Regeneração Urbana	0.347281	0.0189712	0.174671	0.193275	0.0467816	0.145516	0.157429	0.234869	0.516615	0.525271	0.678508	0.872962	0.343874	0.453474	0.131409	0.755589	0.549474	0.388437	9.60826	1.09591	Case-A_A1	89.7532	9	6.53441	42.1784	10
		Cultura e Criatividade	0.545504	0.104299	0.426799	0.132823		0.114287	0.108188			1.1107	0.113038	0.159978	0.661688	0.219978	0.216737	0.716214	1.74893	1.60165	9.85893	1.1245	Case-A_A2	92.0948	6	7.98081	51.5147	3
		Ílhavo Inteligente	0.482839		0.377771	0.156753		0.134878	0.12768	0.0761946	0.705671	0.262161		0.0629335	1.11557	0.865371	0.341048	0.845252	0.938193	0.630072	10.2531	1.16946	Case-A_A3	95.7767	3	7.12239	45.9738	5
		Ílhavo Inclusivo	0.304315	0.155158	0.119047	0.148193	0.191304		0.040236	0.144067	0.555946	0.16523	0.420398	0.317316	1.26559	0.981738	0.268687	0.958914	0.591307	0.39711	10.0611	1.14756	Case-A_A4	93.9837	5	7.02455	45.3422	6
		Parque Central de Ílhavo			0.108367	0.0674488	0.0653029	0.348217	0.494454	0.327856	0.303641	0.733231	0.0574022	0.54159	1.24805	0.44683	0.220123	1.30933	0.322954	0.813336	9.531	1.08709	Case-A_A5	89.0315	10	7.40812	47.8181	4
		Mar e Ria	0.577219		0.225807	0.0936965	0.544294	0.483726	0.457914	0.546529	0.210902	0.940217		0.225705	0.40009			0.808378	0.336474	1.00431	10.1285	1.15524	Case-A_A6	94.6125	4	6.85526	44.2495	9
		Turismo de Futuro	0.265783	0.271024	0.415894	0.517715	0.0835407	0.6682	0.491979	0.251651	0.291332	0.64939	0.293734	0.415707	0.245631			0.837497	0.929585	0.346828	9.84335	1.12272	Case-A_A7	91.9492	7	6.97549	45.0255	8
		Valorização de Capital Humano	1.82818	1.39817	1.14429	1.06833	0.344779			0.346196	0.200392	0.148894	0.151533		1.26717		1.25903			0.477129	10.7052	1.22102	Case-A_A8	100	1	9.63409	62.1864	2
		Economia + Competitiva	3.81661	1.0302	2.98609	3.49851				0.21257	0.98435	1.09708			0.622452		0.951465			0.292965	10.402	1.18645	Case-A_A9	97.1681	2	15.4923	100	1
		Ílhavo e o Porto de Aveiro	1.48691	0.142146	0.727093	0.724082	0.175261	0.311518	0.147447	0.175981		0.908244	0.308114	0.581412	0.515313		0.393847	0.195222	0.216688		9.60852	1.09594	Case-A_A10	89.7556	8	7.00928	45.2436	7
																					10	1.14059
									Economia	Patrimonio natural	Territorio	Inclusao	Qualidade
			0.2112	0.1964	0.1745	0.2067	0.2112		100	92.9924	82.6231	97.8693	100
			0.284	0.2172	0.2222	0.2766			100	76.4789	78.2394	97.3944
			0.2678	0.238	0.2253	0.2689			99.5909	88.5087	83.7858	100
			0.3113	0.2313	0.2354	0.2221			100	74.3013	75.6184	71.346
			0.3937	0.3054	0.3009				100	77.5718	76.4288
			0.2983	0.3311	0.3706				80.4911	89.3416	100
			0.2	0.2	0.2	0.2	0.2
			0.25	0.25	0.25	0.25
			0.25	0.25	0.25	0.25
			0.25	0.25	0.25	0.25
			0.33	0.33	0.33
			0.33	0.33	0.33
			0.3	0.25	0.2	0.1	0.15
			0.3	0.15	0.4	0.15
			0.15	0.4	0.3	0.15
			0.25	0.3	0.2	0.25
			0.3	0.3	0.4
			0.4	0.4	0.2
