# Supplementary material
Source: Research Square preprint supplement (doi:10.21203/rs.3.rs-9567597/v1)
Supplement: Supplementary file 5 [file d470de277c29f181d6182b79.xlsx]

## Sheet: AHP_nivel_0
		PROJETOS-ÂNCORA					ÁREAS DE INTERVENÇÃO & OBJETIVOS ESTRATÉGICOS
			Criteria A				Criteria B				Criteria C				Criteria D			Criteria E
		1. Estratégia de dinamização do tecido económico	3.33333	2.66667	3.33333	4.66667	0.666667	0.333333	0.333333	1	2.33333	1.33333		1	0.333333	1	3.33333		0.666667	0.333333	26.6667	1.40845
		2. Revitalização urbana	1		1.5	1		1	1.5	1	2	3	5	6	1	2		1.5	3	1	31.5	1.66373
		3. Qualificação da rede de serviços e equipamentos	0.75	1.75	0.5	0.75	0.25		0.5	0.5	2	0.25		1	4.5	3.5	1	1.5	1.25	1	21	1.10915
		4. Vagos, território inteligente	2	0.666667	2	1.66667	0.333333	0.666667	0.333333		4	1.66667		2	4	1.33333		0.333333		2.66667	23.6667	1.25
		5. Vagos sustentável	1	0.666667	1.33333	1	4	1	1	4.66667	0.333333	2.66667		2.66667			1.33333	2		1	24.6667	1.30282
		6. Afirmação do turismo	3.33333	2.66667	3.33333	2		4.66667	4	1	1.33333	2	1.66667	1.66667			1	2.66667	2		33.3333	1.76056
		7. Viver Vagos	1.5	0.5	1.5			3	2			6	1	2		1	1	3	5	1	28.5	1.50528
																					0	0
																					0	0
																					0	0
																					18.9333	1	0.700942
			quando são os pesos todos iguais																		Soma		Racio de redestribuição
			0.25	0.25	0.25	0.25	0.25	0.25	0.25	0.25	0.25	0.25	0.25	0.25	0.333333	0.333333	0.333333	0.333333	0.333333	0.333333
		Alternativa 1	0.833333	0.666667	0.833333	1.16667	0.166667	0.0833333	0.0833333	0.25	0.583333	0.333333		0.25	0.111111	0.333333	1.11111		0.222222	0.111111	7.13889		1.04099
		Alternativa 2	0.25		0.375	0.25		0.25	0.375	0.25	0.5	0.75	1.25	1.5	0.333333	0.666667		0.5	1	0.333333	8.58333		0.865811
		Alternativa 3	0.1875	0.4375	0.125	0.1875	0.0625		0.125	0.125	0.5	0.0625		0.25	1.5	1.16667	0.333333	0.5	0.416667	0.333333	6.3125		1.17727
		Alternativa 4	0.5	0.166667	0.5	0.416667	0.0833333	0.166667	0.0833333		1	0.416667		0.5	1.33333	0.444444		0.111111		0.888889	6.61111		1.1241
		Alternativa 5	0.25	0.166667	0.333333	0.25	1	0.25	0.25	1.16667	0.0833333	0.666667		0.666667			0.444444	0.666667		0.333333	6.52778		1.13845
		Alternativa 6	0.833333	0.666667	0.833333	0.5		1.16667	1	0.25	0.333333	0.5	0.416667	0.416667			0.333333	0.888889	0.666667		8.80556		0.843961
		Alternativa 7	0.375	0.125	0.375			0.75	0.5			1.5	0.25	0.5		0.333333	0.333333	1	1.66667	0.333333	8.04167		0.92413
																					7.43155
		valor dos impactos se os critérios do nivel 1 tivessem o mesmo peso																							soma dos impactos se os critérios do nível 1 tivessem o mesmo impacto. Esta operaçao foi para converter a matriz de impactos a ser usada com apenas o nivel 0
		Alternativa 1	0.867496	0.693997	0.867496	1.21449	0.173499	0.0867496	0.0867496	0.260249	0.607247	0.346998		0.260249	0.115666	0.346998	1.15666		0.231332	0.115666	0.412864				3.64348	0.607247	1.21449	1.61933	0.346998
		Alternativa 2	0.216453		0.324679	0.216453		0.216453	0.324679	0.216453	0.432906	0.649359	1.08226	1.29872	0.288604	0.577208		0.432906	0.865811	0.288604	0.412864				0.757585	0.757585	3.46325	0.865811	1.58732
		Alternativa 3	0.220739	0.515058	0.147159	0.220739	0.0735797		0.147159	0.147159	0.588637	0.0735797		0.294319	1.76591	1.37349	0.392425	0.588637	0.490531	0.392425	0.412864				1.1037	0.367898	0.956536	3.53182	1.47159
		Alternativa 4	0.56205	0.18735	0.56205	0.468375	0.093675	0.18735	0.093675		1.1241	0.468375		0.56205	1.4988	0.4996		0.1249		0.9992	0.412864				1.77982	0.3747	2.15452	1.9984	1.1241
		Alternativa 5	0.284612	0.189742	0.379483	0.284612	1.13845	0.284612	0.284612	1.32819	0.0948708	0.758967		0.758967			0.505978	0.758967		0.379483	0.412864				1.13845	3.03587	1.6128	0.505978	1.13845
		Alternativa 6	0.703301	0.562641	0.703301	0.421981		0.984621	0.843961	0.21099	0.28132	0.421981	0.351651	0.351651			0.28132	0.750188	0.562641		0.412864				2.39122	2.03957	1.4066	0.28132	1.31283
		Alternativa 7	0.346549	0.115516	0.346549			0.693098	0.462065			1.3862	0.231033	0.462065		0.308043	0.308043	0.92413	1.54022	0.308043	0.412864				0.808614	1.15516	2.07929	0.616087	2.77239
																									0	0	0	0	0
																									0	0	0	0	0
																									0	0	0	0	0
		Matriz para calcular apenas com nível 0						se os critérios do nivel 0 valerem todos o mesmo -->	0.2	0.2	0.2	0.2	0.2
		Nível 0	0.272467	0.157656	0.141672	0.221847	0.206364																		projeto * nivel1
																							Media se todos criterios valessem o mesmo (considera o nivel 0)		Racio de redestribuição					resultados exercicio
		Alternativa 1	0.728696	0.121449	0.242899	0.323865	0.0693997															1.48631	5.44478		0.967901						0.2112	0.1964	0.1745	0.2067	0.2112
		Alternativa 2	0.151517	0.151517	0.692649	0.173162	0.317464															1.48631	5.09825		1.03369						0.284	0.2172	0.2222	0.2766
		Alternativa 3	0.220739	0.0735797	0.191307	0.706365	0.294319															1.48631	5.0315		1.0474						0.2678	0.238	0.2253	0.2689
		Alternativa 4	0.355965	0.07494	0.430905	0.39968	0.22482															1.48631	5.08395		1.0366						0.3113	0.2313	0.2354	0.2221
		Alternativa 5	0.22769	0.607173	0.322561	0.101196	0.22769															1.48631	5.18224		1.01694						0.3937	0.3054	0.3009
		Alternativa 6	0.478245	0.407915	0.28132	0.0562641	0.262566															1.48631	5.5015		0.957921						0.2983	0.3311	0.3706
		Alternativa 7	0.161723	0.231033	0.415859	0.123217	0.554478															1.48631	5.54782		0.949924
																						1.48631	5.27		1.00148
		esta é que é a matriz usada nos diversos MCDM!
		Alternativa 1	0.705306	0.117551	0.235102	0.313469	0.067172															1.4386	0.28772
		Alternativa 2	0.156622	0.156622	0.715984	0.178996	0.328159															1.53638	0.307277
		Alternativa 3	0.231202	0.0770675	0.200375	0.739848	0.30827															1.55676	0.311353
		Alternativa 4	0.368992	0.0776825	0.446675	0.414307	0.233048															1.5407	0.308141
		Alternativa 5	0.231546	0.617457	0.328024	0.102909	0.231546															1.51148	0.302296
		Alternativa 6	0.45812	0.39075	0.269483	0.0538965	0.251517															1.42377	0.284753
		Alternativa 7	0.153624	0.219463	0.395034	0.117047	0.526712															1.41188	0.282376
																								Order	Rank
		Alternativa 1	0.192172	0.0185326	0.0333074	0.0695423	0.0138619														0.327417			98.8333	2
		Alternativa 2	0.0426742	0.0246923	0.101435	0.0397098	0.0677203														0.276232			83.3827	6
		Alternativa 3	0.0629949	0.0121501	0.0283876	0.164133	0.0636158														0.331282			100	1
		Alternativa 4	0.100538	0.0122471	0.0632814	0.0919128	0.0480926														0.316072			95.4088	3
		Alternativa 5	0.0630886	0.0973455	0.0464719	0.0228302	0.0477828														0.277519			83.7713	5
		Alternativa 6	0.124823	0.0616039	0.0381782	0.0119568	0.0519041														0.288465			87.0756	4
		Alternativa 7	0.0418575	0.0345996	0.0559653	0.0259666	0.108694														0.267083			80.6212	7
																					0.297724
		teste com potencia (em vez de multiplicar o impacto do projeto com o peso do criterio)
		Alternativa 1	0.90926	0.713536	0.814563	0.773094	0.572762														3.78321			97.3679	4
		Alternativa 2	0.603426	0.746559	0.95377	0.682724	0.79458														3.78106			97.3124	5
		Alternativa 3	0.670979	0.667589	0.796326	0.93534	0.784393														3.85463			99.2058	2
		Alternativa 4	0.762126	0.668426	0.8921	0.82244	0.740395														3.88549			100	1
		Alternativa 5	0.671251	0.926804	0.85392	0.603832	0.739408														3.79522			97.6767	3
		Alternativa 6	0.808404	0.862304	0.830466	0.523119	0.75214														3.77643			97.1933	6
		Alternativa 7	0.600257	0.78734	0.876707	0.621324	0.876078														3.76171			96.8143	7
																					3.80539
									Economia	Patrimonio natural	Territorio	Inclusao	Qualidade
			0.2112	0.1964	0.1745	0.2067	0.2112		100	92.9924	82.6231	97.8693	100
			0.284	0.2172	0.2222	0.2766			100	76.4789	78.2394	97.3944
			0.2678	0.238	0.2253	0.2689			99.5909	88.5087	83.7858	100
			0.3113	0.2313	0.2354	0.2221			100	74.3013	75.6184	71.346
			0.3937	0.3054	0.3009				100	77.5718	76.4288
			0.2983	0.3311	0.3706				80.4911	89.3416	100
			0.2	0.2	0.2	0.2	0.2
			0.25	0.25	0.25	0.25
			0.25	0.25	0.25	0.25
			0.25	0.25	0.25	0.25
			0.33	0.33	0.33
			0.33	0.33	0.33
			0.3	0.25	0.2	0.1	0.15
			0.3	0.15	0.4	0.15
			0.15	0.4	0.3	0.15
			0.25	0.3	0.2	0.25
			0.3	0.3	0.4
			0.4	0.4	0.2
			quando são os pesos todos iguais
			0.25	0.25	0.25	0.25	0.25	0.25	0.25	0.25	0.25	0.25	0.25	0.25	0.333333	0.333333	0.333333	0.333333	0.333333	0.333333
			0.2112				0.1964				0.1745				0.2067			0.2112
			0.284	0.2172	0.2222	0.2766	0.2678	0.238	0.2253	0.2689	0.3113	0.2313	0.2354	0.2221	0.3937	0.3054	0.3009	0.2983	0.3311	0.3706

## Sheet: AHP_nivel_0 (neutral)
		PROJETOS-ÂNCORA					ÁREAS DE INTERVENÇÃO & OBJETIVOS ESTRATÉGICOS
			Criteria A				Criteria B				Criteria C				Criteria D			Criteria E
		Alternativa 1	3.33333	2.66667	3.33333	4.66667	0.666667	0.333333	0.333333	1	2.33333	1.33333		1	0.333333	1	3.33333		0.666667	0.333333	26.6667	1.40845
		Alternativa 2	1		1.5	1		1	1.5	1	2	3	5	6	1	2		1.5	3	1	31.5	1.66373
		Alternativa 3	0.75	1.75	0.5	0.75	0.25		0.5	0.5	2	0.25		1	4.5	3.5	1	1.5	1.25	1	21	1.10915
		Alternativa 4	2	0.666667	2	1.66667	0.333333	0.666667	0.333333		4	1.66667		2	4	1.33333		0.333333		2.66667	23.6667	1.25
		Alternativa 5	1	0.666667	1.33333	1	4	1	1	4.66667	0.333333	2.66667		2.66667			1.33333	2		1	24.6667	1.30282
		Alternativa 6	3.33333	2.66667	3.33333	2		4.66667	4	1	1.33333	2	1.66667	1.66667			1	2.66667	2		33.3333	1.76056
		Alternativa 7	1.5	0.5	1.5			3	2			6	1	2		1	1	3	5	1	28.5	1.50528
																					0	0
																					0	0
																					0	0
																					18.9333	1	0.700942
			quando são os pesos todos iguais																		Soma		Racio de redestribuição
			0.25	0.25	0.25	0.25	0.25	0.25	0.25	0.25	0.25	0.25	0.25	0.25	0.333333	0.333333	0.333333	0.333333	0.333333	0.333333
		Alternativa 1	0.833333	0.666667	0.833333	1.16667	0.166667	0.0833333	0.0833333	0.25	0.583333	0.333333		0.25	0.111111	0.333333	1.11111		0.222222	0.111111	7.13889		1.04099
		Alternativa 2	0.25		0.375	0.25		0.25	0.375	0.25	0.5	0.75	1.25	1.5	0.333333	0.666667		0.5	1	0.333333	8.58333		0.865811
		Alternativa 3	0.1875	0.4375	0.125	0.1875	0.0625		0.125	0.125	0.5	0.0625		0.25	1.5	1.16667	0.333333	0.5	0.416667	0.333333	6.3125		1.17727
		Alternativa 4	0.5	0.166667	0.5	0.416667	0.0833333	0.166667	0.0833333		1	0.416667		0.5	1.33333	0.444444		0.111111		0.888889	6.61111		1.1241
		Alternativa 5	0.25	0.166667	0.333333	0.25	1	0.25	0.25	1.16667	0.0833333	0.666667		0.666667			0.444444	0.666667		0.333333	6.52778		1.13845
		Alternativa 6	0.833333	0.666667	0.833333	0.5		1.16667	1	0.25	0.333333	0.5	0.416667	0.416667			0.333333	0.888889	0.666667		8.80556		0.843961
		Alternativa 7	0.375	0.125	0.375			0.75	0.5			1.5	0.25	0.5		0.333333	0.333333	1	1.66667	0.333333	8.04167		0.92413
																					7.43155
		valor dos impactos se os critérios do nivel 1 tivessem o mesmo peso																							soma dos impactos se os critérios do nível 1 tivessem o mesmo impacto. Esta operaçao foi para converter a matriz de impactos a ser usada com apenas o nivel 0
		Alternativa 1	0.867496	0.693997	0.867496	1.21449	0.173499	0.0867496	0.0867496	0.260249	0.607247	0.346998		0.260249	0.115666	0.346998	1.15666		0.231332	0.115666	0.412864				3.64348	0.607247	1.21449	1.61933	0.346998
		Alternativa 2	0.216453		0.324679	0.216453		0.216453	0.324679	0.216453	0.432906	0.649359	1.08226	1.29872	0.288604	0.577208		0.432906	0.865811	0.288604	0.412864				0.757585	0.757585	3.46325	0.865811	1.58732
		Alternativa 3	0.220739	0.515058	0.147159	0.220739	0.0735797		0.147159	0.147159	0.588637	0.0735797		0.294319	1.76591	1.37349	0.392425	0.588637	0.490531	0.392425	0.412864				1.1037	0.367898	0.956536	3.53182	1.47159
		Alternativa 4	0.56205	0.18735	0.56205	0.468375	0.093675	0.18735	0.093675		1.1241	0.468375		0.56205	1.4988	0.4996		0.1249		0.9992	0.412864				1.77982	0.3747	2.15452	1.9984	1.1241
		Alternativa 5	0.284612	0.189742	0.379483	0.284612	1.13845	0.284612	0.284612	1.32819	0.0948708	0.758967		0.758967			0.505978	0.758967		0.379483	0.412864				1.13845	3.03587	1.6128	0.505978	1.13845
		Alternativa 6	0.703301	0.562641	0.703301	0.421981		0.984621	0.843961	0.21099	0.28132	0.421981	0.351651	0.351651			0.28132	0.750188	0.562641		0.412864				2.39122	2.03957	1.4066	0.28132	1.31283
		Alternativa 7	0.346549	0.115516	0.346549			0.693098	0.462065			1.3862	0.231033	0.462065		0.308043	0.308043	0.92413	1.54022	0.308043	0.412864				0.808614	1.15516	2.07929	0.616087	2.77239
																									0	0	0	0	0
																									0	0	0	0	0
																									0	0	0	0	0
		Matriz para calcular apenas com nível 0						se os critérios do nivel 0 valerem todos o mesmo -->	0.2	0.2	0.2	0.2	0.2
		Nível 0	0.2	0.2	0.2	0.2	0.2																		projeto * nivel1
																							Media se todos criterios valessem o mesmo (considera o nivel 0)		Racio de redestribuição					resultados exercicio
		Alternativa 1	0.728696	0.121449	0.242899	0.323865	0.0693997															1.48631	5.44478		0.967901						0.2112	0.1964	0.1745	0.2067	0.2112
		Alternativa 2	0.151517	0.151517	0.692649	0.173162	0.317464															1.48631	5.09825		1.03369						0.284	0.2172	0.2222	0.2766
		Alternativa 3	0.220739	0.0735797	0.191307	0.706365	0.294319															1.48631	5.0315		1.0474						0.2678	0.238	0.2253	0.2689
		Alternativa 4	0.355965	0.07494	0.430905	0.39968	0.22482															1.48631	5.08395		1.0366						0.3113	0.2313	0.2354	0.2221
		Alternativa 5	0.22769	0.607173	0.322561	0.101196	0.22769															1.48631	5.18224		1.01694						0.3937	0.3054	0.3009
		Alternativa 6	0.478245	0.407915	0.28132	0.0562641	0.262566															1.48631	5.5015		0.957921						0.2983	0.3311	0.3706
		Alternativa 7	0.161723	0.231033	0.415859	0.123217	0.554478															1.48631	5.54782		0.949924
																						1.48631	5.27		1.00148
		esta é que é a matriz usada nos diversos MCDM!
		Alternativa 1	0.705306	0.117551	0.235102	0.313469	0.067172															1.4386	0.28772
		Alternativa 2	0.156622	0.156622	0.715984	0.178996	0.328159															1.53638	0.307277
		Alternativa 3	0.231202	0.0770675	0.200375	0.739848	0.30827															1.55676	0.311353
		Alternativa 4	0.368992	0.0776825	0.446675	0.414307	0.233048															1.5407	0.308141
		Alternativa 5	0.231546	0.617457	0.328024	0.102909	0.231546															1.51148	0.302296
		Alternativa 6	0.45812	0.39075	0.269483	0.0538965	0.251517															1.42377	0.284753
		Alternativa 7	0.153624	0.219463	0.395034	0.117047	0.526712															1.41188	0.282376
																								Order	Rank
		Alternativa 1	0.141061	0.0235102	0.0470204	0.0626939	0.0134344														0.28772			92.4097	5
		Alternativa 2	0.0313243	0.0313243	0.143197	0.0357992	0.0656319														0.307277			98.6909	3
		Alternativa 3	0.0462405	0.0154135	0.0400751	0.14797	0.061654														0.311353			100	1
		Alternativa 4	0.0737984	0.0155365	0.0893349	0.0828614	0.0466095														0.308141			98.9684	2
		Alternativa 5	0.0463093	0.123491	0.0656048	0.0205819	0.0463093														0.302296			97.0914	4
		Alternativa 6	0.0916241	0.07815	0.0538965	0.0107793	0.0503034														0.284753			91.4569	6
		Alternativa 7	0.0307249	0.0438927	0.0790068	0.0234094	0.105342														0.282376			90.6934	7
																					0.297702
		teste com potencia (em vez de multiplicar o impacto do projeto com o peso do criterio)
		Alternativa 1	0.932557	0.651696	0.748603	0.792938	0.58269														3.70848			96.1755	7
		Alternativa 2	0.690193	0.690193	0.935364	0.708873	0.800234														3.82486			99.1935	3
		Alternativa 3	0.746102	0.598927	0.725052	0.941518	0.79029														3.80189			98.5978	4
		Alternativa 4	0.819225	0.59988	0.851135	0.838425	0.74729														3.85596			100	1
		Alternativa 5	0.746324	0.908074	0.800168	0.634587	0.746324														3.83548			99.4689	2
		Alternativa 6	0.855453	0.828666	0.769318	0.557586	0.758776														3.7698			97.7656	6
		Alternativa 7	0.687531	0.738367	0.830476	0.651137	0.87966														3.78717			98.2161	5
																					3.79766
									Economia	Patrimonio natural	Territorio	Inclusao	Qualidade
			0.2112	0.1964	0.1745	0.2067	0.2112		100	92.9924	82.6231	97.8693	100
			0.284	0.2172	0.2222	0.2766			100	76.4789	78.2394	97.3944
			0.2678	0.238	0.2253	0.2689			99.5909	88.5087	83.7858	100
			0.3113	0.2313	0.2354	0.2221			100	74.3013	75.6184	71.346
			0.3937	0.3054	0.3009				100	77.5718	76.4288
			0.2983	0.3311	0.3706				80.4911	89.3416	100
			0.2	0.2	0.2	0.2	0.2
			0.25	0.25	0.25	0.25
			0.25	0.25	0.25	0.25
			0.25	0.25	0.25	0.25
			0.33	0.33	0.33
			0.33	0.33	0.33
			0.3	0.25	0.2	0.1	0.15
			0.3	0.15	0.4	0.15
			0.15	0.4	0.3	0.15
			0.25	0.3	0.2	0.25
			0.3	0.3	0.4
			0.4	0.4	0.2
			quando são os pesos todos iguais
			0.25	0.25	0.25	0.25	0.25	0.25	0.25	0.25	0.25	0.25	0.25	0.25	0.333333	0.333333	0.333333	0.333333	0.333333	0.333333
			0.2112				0.1964				0.1745				0.2067			0.2112
			0.284	0.2172	0.2222	0.2766	0.2678	0.238	0.2253	0.2689	0.3113	0.2313	0.2354	0.2221	0.3937	0.3054	0.3009	0.2983	0.3311	0.3706

## Sheet: SAW_nivel_0_máximo
	Criteria A	Criteria B	Criteria C	Criteria D	Criteria E
cópia da tabela anterior - ilhavo harmonizaçao (média dos scores iniciais)
Alternativa 1	0.705306	0.117551	0.235102	0.313469	0.067172
Alternativa 2	0.156622	0.156622	0.715984	0.178996	0.328159
Alternativa 3	0.231202	0.0770675	0.200375	0.739848	0.30827
Alternativa 4	0.368992	0.0776825	0.446675	0.414307	0.233048
Alternativa 5	0.231546	0.617457	0.328024	0.102909	0.231546
Alternativa 6	0.45812	0.39075	0.269483	0.0538965	0.251517
Alternativa 7	0.153624	0.219463	0.395034	0.117047	0.526712
																										5
																										0.25	0.25	0.25	0.25	0.25	0.25
																										0.2112				0.1964
conversao da matriz de impacto numa escala de 1 a 5	Criteria A	Criteria B	Criteria C	Criteria D	Criteria E																					Criteria A	Criteria B	Criteria C	Criteria D	Criteria E
Alternativa 1	4.79858	1.37119	2.05667	2.51365	1.07741															sistema de equação [a(min)+b=1 ///// a(max)+b=5]					pesos	0.272467	0.157656	0.141672	0.221847	0.206364
Alternativa 2	1.59902	1.59902	4.86084	1.7295	2.59931															para transformar os pesos numa escala de 1 a 5						5	1	1	3	3
Alternativa 3	2.03393	1.13512	1.85417	5	2.48333																				conversao sem arredondar	5	1.48885	1.00007	3.4519	2.97841
Alternativa 4	2.83742	1.1387	3.29041	3.10167	2.04469
Alternativa 5	2.03593	4.2863	2.59852	1.28581	2.03593																	min	0.0538965				min	0.14167
Alternativa 6	3.35716	2.9643	2.25715	1	2.15239															0.685712		máx	0.739848				máx	0.27247
Alternativa 7	1.58154	1.96547	2.98928	1.36825	3.75714																						b	-3.33242
																				5.83132							a	30.581							http://www.calculadoraonline.com.br/sistemas-lineares
																				assumindo os mesmos pesos do exercício tambem convertidos numa escala de 1-5
SAW method - todos os critérios são considerados beneficio (relacao com o máximo)	P1,1	P1,2	P1,3	P1,4	P1,5																	ordenaçao				se os pesos forem convertidos numa escala 1-5 mas não estiverem arredondados
	1	0.319901	0.423109	0.50273	0.286764														1	1. Estratégia de dinamização do tecido económico	8.11149	100	1			92.7726	2			0.878093	54.3568	7
SAW weight	5	0.319901	0.423109	1.50819	0.860293														2	2. Revitalização urbana	6.1524	75.8479	6			70.3965	7			1.33868	82.8689	3
	P2,1	P2,2	P2,3	P2,4	P2,5														3	3. Qualificação da rede de serviços e equipamentos	7.74847	95.5245	2			78.5866	5			1.27353	78.8355	4
	0.333228	0.373054	1	0.345899	0.691834														4	4. Vagos, território inteligente	7.39275	91.1392	3			67.4035	8			1.61542	100	1
SAW weight	1.66614	0.373054	1	1.0377	2.0755														5	5. Vagos sustentável	6.05311	74.6239	7			81.3752	4			1.4223	88.0451	2
	P3,1	P3,2	P3,3	P3,4	P3,5														6	6. Afirmação do turismo	6.97265	85.9601	4			60.6875	9			1.15839	71.708	5
	0.42386	0.264825	0.381449	1	0.660964														7	7. Viver Vagos	6.5424	80.6559	5			53.1555	10			1.1445	70.8485	6
SAW weight	2.1193	0.264825	0.381449	3	1.98289																					77.8698	6			0	0
	P4,1	P4,2	P4,3	P4,4	P4,5																									0	0
	0.591305	0.265661	0.676922	0.620334	0.544214																									0	0
SAW weight	2.95653	0.265661	0.676922	1.861	1.63264
	P5,1	P5,2	P5,3	P5,4	P5,5																média	86.2502
	0.424278	1	0.534583	0.257162	0.541884																desvio padrao	0.734356
SAW weight	2.12139	1	0.534583	0.771486	1.62565																variancia	0.539279
	P6,1	P6,2	P6,3	P6,4	P6,5
	0.699615	0.691575	0.464354	0.2	0.57288
SAW weight	3.49808	0.691575	0.464354	0.6	1.71864
	P7,1	P7,2	P7,3	P7,4	P7,5
	0.329586	0.458548	0.614972	0.27365	1
SAW weight	1.64793	0.458548	0.614972	0.820951	3

## Sheet: SAW_nivel_0_máximo (neutral)
	Criteria A	Criteria B	Criteria C	Criteria D	Criteria E
cópia da tabela anterior - ilhavo harmonizaçao (média dos scores iniciais)
Alternativa 1	0.705306	0.117551	0.235102	0.313469	0.067172
Alternativa 2	0.156622	0.156622	0.715984	0.178996	0.328159
Alternativa 3	0.231202	0.0770675	0.200375	0.739848	0.30827
Alternativa 4	0.368992	0.0776825	0.446675	0.414307	0.233048
Alternativa 5	0.231546	0.617457	0.328024	0.102909	0.231546
Alternativa 6	0.45812	0.39075	0.269483	0.0538965	0.251517
Alternativa 7	0.153624	0.219463	0.395034	0.117047	0.526712
																										5
																										0.25	0.25	0.25	0.25	0.25	0.25
																										0.2112				0.1964
conversao da matriz de impacto numa escala de 1 a 5	Criteria A	Criteria B	Criteria C	Criteria D	Criteria E																					Criteria A	Criteria B	Criteria C	Criteria D	Criteria E
Alternativa 1	4.79858	1.37119	2.05667	2.51365	1.07741															sistema de equação [a(min)+b=1 ///// a(max)+b=5]					pesos	0.2	0.2	0.2	0.1999	0.2
Alternativa 2	1.59902	1.59902	4.86084	1.7295	2.59931															para transformar os pesos numa escala de 1 a 5						5	5	5	1	5
Alternativa 3	2.03393	1.13512	1.85417	5	2.48333																				conversao sem arredondar	5	5	5	1	5
Alternativa 4	2.83742	1.1387	3.29041	3.10167	2.04469
Alternativa 5	2.03593	4.2863	2.59852	1.28581	2.03593																	min	0.0538965				min	0.1999
Alternativa 6	3.35716	2.9643	2.25715	1	2.15239															0.685712		máx	0.739848				máx	0.2
Alternativa 7	1.58154	1.96547	2.98928	1.36825	3.75714																						b	-7995
																				5.83132							a	40000							http://www.calculadoraonline.com.br/sistemas-lineares
																				assumindo os mesmos pesos do exercício tambem convertidos numa escala de 1-5
SAW method - todos os critérios são considerados beneficio (relacao com o máximo)	P1,1	P1,2	P1,3	P1,4	P1,5																	ordenaçao				se os pesos forem convertidos numa escala 1-5 mas não estiverem arredondados
	1	0.319901	0.423109	0.50273	0.286764														1	1. Estratégia de dinamização do tecido económico	10.6516	83.4707	6			92.7726	2			12.1957	54.3568	7
SAW weight	5	1.5995	2.11554	0.50273	1.43382														2	2. Revitalização urbana	12.3365	96.6742	3			70.3965	7			18.5928	82.8689	3
	P2,1	P2,2	P2,3	P2,4	P2,5														3	3. Qualificação da rede de serviços e equipamentos	9.65549	75.6647	7			78.5866	5			17.6879	78.8355	4
	0.333228	0.373054	1	0.345899	0.691834														4	4. Vagos, território inteligente	11.0108	86.2859	5			67.4035	8			22.4364	100	1
SAW weight	1.66614	1.86527	5	0.345899	3.45917														5	5. Vagos sustentável	12.7609	100	1			81.3752	4			19.7542	88.0451	2
	P3,1	P3,2	P3,3	P3,4	P3,5														6	6. Afirmação do turismo	12.3421	96.7184	2			60.6875	9			16.0887	71.708	5
	0.42386	0.264825	0.381449	1	0.660964														7	7. Viver Vagos	12.2892	96.3035	4			53.1555	10			15.8959	70.8485	6
SAW weight	2.1193	1.32412	1.90725	1	3.30482																						6
	P4,1	P4,2	P4,3	P4,4	P4,5																						1
	0.591305	0.265661	0.676922	0.620334	0.544214																						3
SAW weight	2.95653	1.32831	3.38461	0.620334	2.72107
	P5,1	P5,2	P5,3	P5,4	P5,5																média	90.7311
	0.424278	1	0.534583	0.257162	0.541884																desvio padrao	1.06503
SAW weight	2.12139	5	2.67291	0.257162	2.70942																variancia	1.1343
	P6,1	P6,2	P6,3	P6,4	P6,5
	0.699615	0.691575	0.464354	0.2	0.57288
SAW weight	3.49808	3.45788	2.32177	0.2	2.8644
	P7,1	P7,2	P7,3	P7,4	P7,5
	0.329586	0.458548	0.614972	0.27365	1
SAW weight	1.64793	2.29274	3.07486	0.27365	5

## Sheet: WPM_nivel_0 (maximo)
	Criteria A	Criteria B	Criteria C	Criteria D	Criteria E
cópia da tabela anterior - ilhavo harmonizaçao (média dos scores iniciais)
Alternativa 1	0.705306	0.117551	0.235102	0.313469	0.067172
Alternativa 2	0.156622	0.156622	0.715984	0.178996	0.328159
Alternativa 3	0.231202	0.0770675	0.200375	0.739848	0.30827
Alternativa 4	0.368992	0.0776825	0.446675	0.414307	0.233048
Alternativa 5	0.231546	0.617457	0.328024	0.102909	0.231546
Alternativa 6	0.45812	0.39075	0.269483	0.0538965	0.251517
Alternativa 7	0.153624	0.219463	0.395034	0.117047	0.526712
																										5
																										0.25	0.25	0.25	0.25	0.25	0.25
																										0.2112				0.1964
Caso: média scores originais, caso os critérios tivessem todos o mesmo peso	Criteria A	Criteria B	Criteria C	Criteria D	Criteria E																					Criteria A	Criteria B	Criteria C	Criteria D	Criteria E
Alternativa 1	4.79858	1.37119	2.05667	2.51365	1.07741															sistema de equação [a(min)+b=1 ///// a(max)+b=5]					pesos	0.272467	0.157656	0.141672	0.221847	0.206364
Alternativa 2	1.59902	1.59902	4.86084	1.7295	2.59931															para transformar os pesos numa escala de 1 a 5						5	1	1	3	3
Alternativa 3	2.03393	1.13512	1.85417	5	2.48333																				conversao sem arredondar	5	1.48885	1.00007	3.4519	2.97841
Alternativa 4	2.83742	1.1387	3.29041	3.10167	2.04469
Alternativa 5	2.03593	4.2863	2.59852	1.28581	2.03593																	min	0.0538965				min	0.14167
Alternativa 6	3.35716	2.9643	2.25715	1	2.15239															0.685712		máx	0.739848				máx	0.27247
Alternativa 7	1.58154	1.96547	2.98928	1.36825	3.75714																						b	-3.33242
																				5.83132							a	30.581							http://www.calculadoraonline.com.br/sistemas-lineares
																				Weighted product method
based on SAW method	P1,1	P1,2	P1,3	P1,4	P1,5
	1	0.319901	0.423109	0.50273	0.286764														1	1. Estratégia de dinamização do tecido económico	0.000405554	81.0847	2
WPM weight	1	0.319901	0.423109	0.127059	0.0235817														2	2. Revitalização urbana	2.10056e-05	4.19977	6
	P2,1	P2,2	P2,3	P2,4	P2,5														3	3. Qualificação da rede de serviços e equipamentos	0.000399064	79.787	3
	0.333228	0.373054	1	0.345899	0.691834														4	4. Vagos, território inteligente	0.000500161	100	1
WPM weight	0.00410876	0.373054	1	0.0413855	0.331135														5	5. Vagos sustentável	1.98888e-05	3.97647	7
	P3,1	P3,2	P3,3	P3,4	P3,5														6	6. Afirmação do turismo	8.09592e-05	16.1866	4
	0.42386	0.264825	0.381449	1	0.660964														7	7. Viver Vagos	2.24736e-05	4.49326	5
WPM weight	0.0136809	0.264825	0.381449	1	0.288757
	P4,1	P4,2	P4,3	P4,4	P4,5
	0.591305	0.265661	0.676922	0.620334	0.544214
WPM weight	0.0722866	0.265661	0.676922	0.238713	0.161179
	P5,1	P5,2	P5,3	P5,4	P5,5
	0.424278	1	0.534583	0.257162	0.541884
WPM weight	0.0137485	1	0.534583	0.0170067	0.159118
	P6,1	P6,2	P6,3	P6,4	P6,5
	0.699615	0.691575	0.464354	0.2	0.57288
WPM weight	0.167609	0.691575	0.464354	0.008	0.188014
	P7,1	P7,2	P7,3	P7,4	P7,5
	0.329586	0.458548	0.614972	0.27365	1
WPM weight	0.00388906	0.458548	0.614972	0.0204921	1

## Sheet: WPM_nivel_0 (maximo) (neutral)
	Criteria A	Criteria B	Criteria C	Criteria D	Criteria E
cópia da tabela anterior - ilhavo harmonizaçao (média dos scores iniciais)
Alternativa 1	0.705306	0.117551	0.235102	0.313469	0.067172
Alternativa 2	0.156622	0.156622	0.715984	0.178996	0.328159
Alternativa 3	0.231202	0.0770675	0.200375	0.739848	0.30827
Alternativa 4	0.368992	0.0776825	0.446675	0.414307	0.233048
Alternativa 5	0.231546	0.617457	0.328024	0.102909	0.231546
Alternativa 6	0.45812	0.39075	0.269483	0.0538965	0.251517
Alternativa 7	0.153624	0.219463	0.395034	0.117047	0.526712
																										5
																										0.25	0.25	0.25	0.25	0.25	0.25
																										0.2112				0.1964
Caso: média scores originais, caso os critérios tivessem todos o mesmo peso	Criteria A	Criteria B	Criteria C	Criteria D	Criteria E																					Criteria A	Criteria B	Criteria C	Criteria D	Criteria E
Alternativa 1	4.79858	1.37119	2.05667	2.51365	1.07741															sistema de equação [a(min)+b=1 ///// a(max)+b=5]					pesos	0.2	0.2	0.2	0.1999	0.2
Alternativa 2	1.59902	1.59902	4.86084	1.7295	2.59931															para transformar os pesos numa escala de 1 a 5						5	5	5	1	5
Alternativa 3	2.03393	1.13512	1.85417	5	2.48333																				conversao sem arredondar	5	5	5	1	5
Alternativa 4	2.83742	1.1387	3.29041	3.10167	2.04469
Alternativa 5	2.03593	4.2863	2.59852	1.28581	2.03593																	min	0.0538965				min	0.1999
Alternativa 6	3.35716	2.9643	2.25715	1	2.15239															0.685712		máx	0.739848				máx	0.2
Alternativa 7	1.58154	1.96547	2.98928	1.36825	3.75714																						b	-7995
																				5.83132							a	40000							http://www.calculadoraonline.com.br/sistemas-lineares
																				Weighted product method
based on SAW method	P1,1	P1,2	P1,3	P1,4	P1,5
	1	0.319901	0.423109	0.50273	0.286764														1	1. Estratégia de dinamização do tecido económico	4.42893e-08	0.61409	6
WPM weight	1	0.00335024	0.01356	0.50273	0.00193922														2	2. Revitalização urbana	1.62753e-06	22.5664	4
	P2,1	P2,2	P2,3	P2,4	P2,5														3	3. Qualificação da rede de serviços e equipamentos	1.81542e-08	0.251716	7
	0.333228	0.373054	1	0.345899	0.691834														4	4. Vagos, território inteligente	4.02595e-07	5.58215	5
WPM weight	0.00410876	0.00722538	1	0.345899	0.158492														5	5. Vagos sustentável	7.21218e-06	100	1
	P3,1	P3,2	P3,3	P3,4	P3,5														6	6. Afirmação do turismo	7.06459e-06	97.9536	2
	0.42386	0.264825	0.381449	1	0.660964														7	7. Viver Vagos	1.89775e-06	26.3131	3
WPM weight	0.0136809	0.00130254	0.00807576	1	0.12615
	P4,1	P4,2	P4,3	P4,4	P4,5
	0.591305	0.265661	0.676922	0.620334	0.544214
WPM weight	0.0722866	0.00132325	0.142133	0.620334	0.0477363
	P5,1	P5,2	P5,3	P5,4	P5,5
	0.424278	1	0.534583	0.257162	0.541884
WPM weight	0.0137485	1	0.0436591	0.257162	0.046723
	P6,1	P6,2	P6,3	P6,4	P6,5
	0.699615	0.691575	0.464354	0.2	0.57288
WPM weight	0.167609	0.158197	0.0215896	0.2	0.0617047
	P7,1	P7,2	P7,3	P7,4	P7,5
	0.329586	0.458548	0.614972	0.27365	1
WPM weight	0.00388906	0.0202732	0.087958	0.27365	1

## Sheet: TOPSIS_Nivel_0
			Criteria A	Criteria B	Criteria C	Criteria D	Criteria E
		cópia da tabela anterior
		Alternativa 1	0.705306	0.117551	0.235102	0.313469	0.067172
		Alternativa 2	0.156622	0.156622	0.715984	0.178996	0.328159
		Alternativa 3	0.231202	0.0770675	0.200375	0.739848	0.30827
		Alternativa 4	0.368992	0.0776825	0.446675	0.414307	0.233048
		Alternativa 5	0.231546	0.617457	0.328024	0.102909	0.231546
		Alternativa 6	0.45812	0.39075	0.269483	0.0538965	0.251517
		Alternativa 7	0.153624	0.219463	0.395034	0.117047	0.526712
		normalizar de acordo com TOPSIS
		Alternativa 1	0.70577	0.147816	0.219823	0.334822	0.0829447
		Alternativa 2	0.156725	0.196946	0.669452	0.191189	0.405215
		Alternativa 3	0.231355	0.0969096	0.187353	0.790243	0.380655
		Alternativa 4	0.369235	0.097683	0.417645	0.442528	0.28777
		Alternativa 5	0.231699	0.77643	0.306705	0.109919	0.285916
		Alternativa 6	0.458422	0.491354	0.251969	0.0575677	0.310576
		Alternativa 7	0.153725	0.275967	0.36936	0.12502	0.650389
																					Si+	Si-	Pi	Rank			Criteria A	Criteria B	Criteria C	Criteria D	Criteria E
		Alternativa 1	0.192299	0.023304	0.0311428	0.0742793	0.0171168														0.0621997	0.245813	0.798061	1	100	pesos	0.272467	0.157656	0.141672	0.221847	0.206364
		Alternativa 2	0.0427022	0.0310496	0.0948428	0.0424147	0.0836217														0.180539	0.169024	0.483529	5	60.5879
		Alternativa 3	0.0630364	0.0152783	0.0265427	0.175313	0.0785534														0.216571	0.140312	0.39316	7	49.2644
		Alternativa 4	0.100604	0.0154003	0.0591687	0.0981736	0.0593853														0.136208	0.166498	0.550033	3	68.9211
		Alternativa 5	0.0631302	0.122408	0.0434516	0.0243853	0.0590027														0.174174	0.177564	0.504818	4	63.2556
		Alternativa 6	0.124905	0.0774647	0.035697	0.0127712	0.0640917														0.103439	0.20916	0.669101	2	83.8408
		Alternativa 7	0.0418851	0.0435078	0.0523281	0.0277353	0.134217														0.194993	0.172662	0.469629	6	58.8463
		calculate ideal worst	0.0418851	0.122408	0.0948428	0.175313	0.134217
		calculate ideal best	0.192299	0.0152783	0.0265427	0.0127712	0.0171168

## Sheet: TOPSIS_Nivel_0 (neutral)
			Criteria A	Criteria B	Criteria C	Criteria D	Criteria E
		cópia da tabela anterior
		Alternativa 1	0.705306	0.117551	0.235102	0.313469	0.067172
		Alternativa 2	0.156622	0.156622	0.715984	0.178996	0.328159
		Alternativa 3	0.231202	0.0770675	0.200375	0.739848	0.30827
		Alternativa 4	0.368992	0.0776825	0.446675	0.414307	0.233048
		Alternativa 5	0.231546	0.617457	0.328024	0.102909	0.231546
		Alternativa 6	0.45812	0.39075	0.269483	0.0538965	0.251517
		Alternativa 7	0.153624	0.219463	0.395034	0.117047	0.526712
		normalizar de acordo com TOPSIS
		Alternativa 1	0.70577	0.147816	0.219823	0.334822	0.0829447
		Alternativa 2	0.156725	0.196946	0.669452	0.191189	0.405215
		Alternativa 3	0.231355	0.0969096	0.187353	0.790243	0.380655
		Alternativa 4	0.369235	0.097683	0.417645	0.442528	0.28777
		Alternativa 5	0.231699	0.77643	0.306705	0.109919	0.285916
		Alternativa 6	0.458422	0.491354	0.251969	0.0575677	0.310576
		Alternativa 7	0.153725	0.275967	0.36936	0.12502	0.650389
																					Si+	Si-	Pi	Rank			Criteria A	Criteria B	Criteria C	Criteria D	Criteria E
		Alternativa 1	0.141154	0.0295632	0.0439645	0.0669643	0.0165889														0.0567505	0.239289	0.808301	1	100	pesos	0.2	0.2	0.2	0.2	0.2
		Alternativa 2	0.0313449	0.0393892	0.13389	0.0382377	0.0810429														0.163167	0.173757	0.515715	4	63.8024
		Alternativa 3	0.0462709	0.0193819	0.0374706	0.158049	0.076131														0.184447	0.175835	0.488049	7	60.3796
		Alternativa 4	0.073847	0.0195366	0.083529	0.0885056	0.0575539														0.119405	0.181433	0.603092	3	74.6123
		Alternativa 5	0.0463397	0.155286	0.0613411	0.0219838	0.0571831														0.172589	0.171271	0.498084	6	61.6211
		Alternativa 6	0.0916844	0.0982708	0.0503938	0.0115135	0.0621152														0.104453	0.200069	0.656994	2	81.2809
		Alternativa 7	0.0307451	0.0551934	0.0738721	0.025004	0.130078														0.166911	0.176979	0.514638	5	63.6691
		calculate ideal worst	0.0307451	0.155286	0.13389	0.158049	0.130078
		calculate ideal best	0.141154	0.0193819	0.0374706	0.0115135	0.0165889
