# Supplementary material
Source: Research Square preprint supplement (doi:10.21203/rs.3.rs-9567597/v1)
Supplement: Supplementary file 6 [file e816c3886ce8331eb5ee0a41.xlsx]

## Sheet: respostas original
id	matrix	session_id	matrixid	r2	consistent	complete	retries	dim	vetor					data
11	1.00,3.00,4.00,3.00,3.00,0.33,1.00,3.00,1.00,1.00,0.25,0.33,1.00,0.50,1.00,0.33,1.00,2.00,1.00,2.00,0.33,1.00,1.00,0.50,1.00	559c15ce9d46c	0	0.8766	1	1	0	5	0.4314	0.1741	0.0926	0.1809	0.1211	2015-07-07
23	1.00,0.33,0.33,0.50,3.00,1.00,3.00,3.00,3.00,0.33,1.00,1.00,2.00,0.33,1.00,1.00	559c15ce9d46c	1.0	0.7769	1	1	0	4	0.1078	0.4853	0.2173	0.1896		2015-07-07
38	1.00,3.00,3.00,1.00,0.33,1.00,1.00,1.00,0.33,1.00,1.00,1.00,1.00,1.00,1.00,1.00	559c15ce9d46c	1.1	0.7771	1	1	1	4	0.4062	0.1771	0.1771	0.2396		2015-07-07
48	1.00,4.00,3.00,2.00,0.25,1.00,0.50,0.50,0.33,2.00,1.00,1.00,0.50,2.00,1.00,1.00	559c15ce9d46c	1.2	0.9646	1	1	0	4	0.4786	0.1083	0.1966	0.2166		2015-07-07
53	1.00,3.00,1.00,0.33,1.00,0.50,1.00,2.00,1.00	559c15ce9d46c	1.3	0.9503	1	1	0	3	0.4429	0.1698	0.3873			2015-07-07
54	1.00,1.00,1.00,1.00,1.00,1.00,1.00,1.00,1.00	559c15ce9d46c	1.4	1.0000	1	1	0	3	0.3333	0.3333	0.3333			2015-07-07
25	1.00,3.00,4.00,2.00,1.00,0.33,1.00,4.00,0.33,0.33,0.25,0.25,1.00,0.33,0.33,0.50,3.00,3.00,1.00,0.33,1.00,3.00,3.00,3.00,1.00	559c16e9cd735	0	0.6980	1	1	0	5	0.3034	0.1267	0.0666	0.1832	0.3201	2015-07-07
32	1.00,1.00,2.00,2.00,1.00,1.00,1.00,1.00,0.50,1.00,1.00,1.00,0.50,1.00,1.00,1.00	559c16e9cd735	1.0	0.7604	1	1	0	4	0.3458	0.2458	0.2042	0.2042		2015-07-07
42	1.00,2.00,1.00,1.00,0.50,1.00,0.50,0.50,1.00,2.00,1.00,1.00,1.00,2.00,1.00,1.00	559c16e9cd735	1.1	1.0000	1	1	0	4	0.2857	0.1429	0.2857	0.2857		2015-07-07
50	1.00,2.00,1.00,2.00,0.50,1.00,0.50,2.00,1.00,2.00,1.00,2.00,0.50,0.50,0.50,1.00	559c16e9cd735	1.2	0.8515	1	1	0	4	0.329	0.2002	0.329	0.1418		2015-07-07
56	1.00,1.00,0.50,1.00,1.00,0.50,2.00,2.00,1.00	559c16e9cd735	1.3	1.0000	1	1	1	3	0.25	0.25	0.5			2015-07-07
57	1.00,0.50,1.00,2.00,1.00,2.00,1.00,0.50,1.00	559c16e9cd735	1.4	1.0000	1	1	1	3	0.25	0.5	0.25			2015-07-07
6	1.00,3.00,2.00,2.00,2.00,0.33,1.00,3.00,0.50,2.00,0.50,0.33,1.00,3.00,3.00,0.50,2.00,0.33,1.00,0.50,0.50,0.50,0.33,2.00,1.00	559c16eb2318b	0	0.3528	0	1	2	5	0.3125	0.2016	0.2162	0.1391	0.1305	2015-07-07
21	1.00,2.00,0.33,0.33,0.50,1.00,0.33,0.33,3.00,3.00,1.00,3.00,3.00,3.00,0.33,1.00	559c16eb2318b	1.0	0.7371	1	1	0	4	0.1484	0.104	0.469	0.2786		2015-07-07
26	1.00,0.33,0.33,0.33,3.00,1.00,0.33,0.33,3.00,3.00,1.00,0.33,3.00,3.00,3.00,1.00	559c16eb2318b	1.1	0.6529	1	1	0	4	0.0959	0.1686	0.2725	0.463		2015-07-07
31	1.00,3.00,1.00,1.00,0.33,1.00,0.50,0.50,1.00,2.00,1.00,2.00,1.00,2.00,0.50,1.00	559c16eb2318b	1.2	0.8314	1	1	0	4	0.3076	0.1257	0.3319	0.2347		2015-07-07
36	1.00,2.00,0.50,0.50,1.00,0.50,2.00,2.00,1.00	559c16eb2318b	1.3	0.8227	1	1	0	3	0.3119	0.1976	0.4905			2015-07-07
40	1.00,1.00,1.00,1.00,1.00,1.00,1.00,1.00,1.00	559c16eb2318b	1.4	1.0000	1	1	0	3	0.3333	0.3333	0.3333			2015-07-07
7	1.00,3.00,2.00,3.00,2.00,0.33,1.00,1.00,2.00,1.00,0.50,1.00,1.00,2.00,2.00,0.33,0.50,0.50,1.00,0.50,0.50,1.00,0.50,2.00,1.00	559c16efb7bbb	0	0.8492	1	1	1	5	0.3688	0.1665	0.2098	0.0958	0.159	2015-07-07
14	1.00,2.00,1.00,1.00,0.50,1.00,0.50,0.33,1.00,2.00,1.00,0.50,1.00,3.00,2.00,1.00	559c16efb7bbb	1.0	0.9344	1	1	0	4	0.2777	0.1242	0.2336	0.3645		2015-07-07
35	1.00,2.00,2.00,3.00,0.50,1.00,1.00,1.00,0.50,1.00,1.00,2.00,0.33,1.00,0.50,1.00	559c16efb7bbb	1.1	0.9346	1	1	0	4	0.4254	0.1948	0.2306	0.1492		2015-07-07
44	1.00,3.00,1.00,1.00,0.33,1.00,0.50,0.50,1.00,2.00,1.00,0.50,1.00,2.00,2.00,1.00	559c16efb7bbb	1.2	0.8314	1	1	0	4	0.3076	0.1257	0.2347	0.3319		2015-07-07
46	1.00,3.00,0.50,0.33,1.00,0.50,2.00,2.00,1.00	559c16efb7bbb	1.3	0.6857	1	1	0	3	0.35	0.1722	0.4778			2015-07-07
49	1.00,1.00,3.00,1.00,1.00,3.00,0.33,0.33,1.00	559c16efb7bbb	1.4	1.0000	1	1	0	3	0.4286	0.4286	0.1429			2015-07-07
4	1.00,3.00,2.00,4.00,3.00,0.33,1.00,1.00,0.50,0.33,0.50,1.00,1.00,2.00,1.00,0.25,2.00,0.50,1.00,2.00,0.33,3.00,1.00,0.50,1.00	559c16f063e9d	0	0.6737	1	1	0	5	0.3973	0.1055	0.175	0.1584	0.1637	2015-07-07
17	1.00,2.00,0.33,0.50,0.50,1.00,0.25,0.33,3.00,4.00,1.00,0.50,2.00,3.00,2.00,1.00	559c16f063e9d	1.0	0.8297	1	1	0	4	0.1653	0.0974	0.3387	0.3986		2015-07-07
27	1.00,0.33,0.50,2.00,3.00,1.00,1.00,3.00,2.00,1.00,1.00,3.00,0.50,0.33,0.33,1.00	559c16f063e9d	1.1	0.9234	1	1	0	4	0.1694	0.3807	0.3422	0.1077		2015-07-07
37	1.00,2.00,0.50,1.00,0.50,1.00,0.33,0.25,2.00,3.00,1.00,0.33,1.00,4.00,3.00,1.00	559c16f063e9d	1.2	0.7826	1	1	0	4	0.2282	0.0942	0.2701	0.4075		2015-07-07
41	1.00,3.00,0.25,0.33,1.00,0.25,4.00,4.00,1.00	559c16f063e9d	1.3	0.7851	1	1	0	3	0.2431	0.1181	0.6389			2015-07-07
45	1.00,0.33,3.00,3.00,1.00,3.00,0.33,0.33,1.00	559c16f063e9d	1.4	0.7472	1	1	0	3	0.2864	0.5736	0.1399			2015-07-07
5	1.00,2.00,1.00,3.00,2.00,0.50,1.00,1.00,1.00,2.00,1.00,1.00,1.00,1.00,1.00,0.33,1.00,1.00,1.00,2.00,0.50,0.50,1.00,0.50,1.00	559c16f5f2de2	0	0.6101	1	1	0	5	0.315	0.1871	0.1921	0.1771	0.1286	2015-07-07
29	1.00,0.50,1.00,0.50,2.00,1.00,3.00,0.50,1.00,0.33,1.00,0.33,2.00,2.00,3.00,1.00	559c16f5f2de2	1.0	0.8745	1	1	1	4	0.1591	0.2959	0.1304	0.4147		2015-07-07
43	1.00,3.00,3.00,2.00,0.33,1.00,2.00,1.00,0.33,0.50,1.00,1.00,0.50,1.00,1.00,1.00	559c16f5f2de2	1.1	0.8727	1	1	0	4	0.4589	0.2053	0.1469	0.1889		2015-07-07
51	1.00,1.00,0.50,2.00,1.00,1.00,0.33,0.50,2.00,3.00,1.00,3.00,0.50,2.00,0.33,1.00	559c16f5f2de2	1.2	0.8398	1	1	0	4	0.2259	0.149	0.449	0.1761		2015-07-07
55	1.00,1.00,2.00,1.00,1.00,3.00,0.50,0.33,1.00	559c16f5f2de2	1.3	0.9503	1	1	0	3	0.3873	0.4429	0.1698			2015-07-07
58	1.00,0.33,0.50,3.00,1.00,3.00,2.00,0.33,1.00	559c16f5f2de2	1.4	0.8823	1	1	0	3	0.1593	0.5889	0.2519			2015-07-07
2	1.00,1.00,1.00,0.33,0.33,1.00,1.00,0.33,0.33,0.33,1.00,3.00,1.00,0.50,0.50,3.00,3.00,2.00,1.00,2.00,3.00,3.00,2.00,0.50,1.00	559c16f65cdd4	0	0.8446	1	1	0	5	0.113	0.0919	0.1698	0.3554	0.2699	2015-07-07
9	1.00,0.33,0.25,0.33,3.00,1.00,3.00,1.00,4.00,0.33,1.00,0.50,3.00,1.00,2.00,1.00	559c16f65cdd4	1.0	0.7200	1	1	0	4	0.0934	0.3702	0.2063	0.3302		2015-07-07
13	1.00,3.00,3.00,3.00,0.33,1.00,1.00,2.00,0.33,1.00,1.00,3.00,0.33,0.50,0.33,1.00	559c16f65cdd4	1.1	0.7769	1	1	0	4	0.4853	0.1896	0.2173	0.1078		2015-07-07
16	1.00,3.00,3.00,2.00,0.33,1.00,0.50,0.50,0.33,2.00,1.00,1.00,0.50,2.00,1.00,1.00	559c16f65cdd4	1.2	0.8898	1	1	0	4	0.4566	0.1202	0.202	0.2212		2015-07-07
18	1.00,1.00,1.00,1.00,1.00,1.00,1.00,1.00,1.00	559c16f65cdd4	1.3	1.0000	1	1	0	3	0.3333	0.3333	0.3333			2015-07-07
20	1.00,1.00,1.00,1.00,1.00,1.00,1.00,1.00,1.00	559c16f65cdd4	1.4	1.0000	1	1	0	3	0.3333	0.3333	0.3333			2015-07-07
1	1.00,4.00,4.00,3.00,1.00,0.25,1.00,0.33,0.25,0.33,0.25,3.00,1.00,1.00,0.50,0.33,4.00,1.00,1.00,2.00,1.00,3.00,2.00,0.50,1.00	559c1701d9a37	0	0.7478	1	1	0	5	0.3656	0.0615	0.1371	0.2184	0.2174	2015-07-07
8	1.00,1.00,1.00,0.50,1.00,1.00,2.00,1.00,1.00,0.50,1.00,0.50,2.00,1.00,2.00,1.00	559c1701d9a37	1.0	0.8352	1	1	1	4	0.2048	0.2881	0.169	0.3381		2015-07-07
12	1.00,2.00,1.00,1.00,0.50,1.00,1.00,1.00,1.00,1.00,1.00,1.00,1.00,1.00,1.00,1.00	559c1701d9a37	1.1	0.4950	0	1	1	4	0.2964	0.2107	0.2464	0.2464		2015-07-07
19	1.00,3.00,3.00,2.00,0.33,1.00,1.00,1.00,0.33,1.00,1.00,1.00,0.50,1.00,1.00,1.00	559c1701d9a37	1.2	0.9575	1	1	0	4	0.4654	0.1718	0.1718	0.191		2015-07-07
28	1.00,0.33,0.33,3.00,1.00,1.00,3.00,1.00,1.00	559c1701d9a37	1.3	1.0000	1	1	0	3	0.1429	0.4286	0.4286			2015-07-07
33	1.00,2.00,2.00,0.50,1.00,2.00,0.50,0.50,1.00	559c1701d9a37	1.4	0.8227	1	1	0	3	0.4905	0.3119	0.1976			2015-07-07
3	1.00,4.00,4.00,2.00,2.00,0.25,1.00,1.00,0.25,0.33,0.25,1.00,1.00,0.33,0.50,0.50,4.00,3.00,1.00,2.00,0.50,3.00,2.00,0.50,1.00	559c17167d2a8	0	0.9412	1	1	0	5	0.3808	0.0772	0.087	0.2736	0.1813	2015-07-07
24	1.00,0.50,3.00,3.00,2.00,1.00,4.00,4.00,0.33,0.25,1.00,2.00,0.33,0.25,0.50,1.00	559c17167d2a8	1.0	0.9100	1	1	0	4	0.2939	0.479	0.1334	0.0937		2015-07-07
47	1.00,3.00,3.00,2.00,0.33,1.00,3.00,3.00,0.33,0.33,1.00,0.50,0.50,0.33,2.00,1.00	559c17167d2a8	1.1	0.6864	1	1	0	4	0.4364	0.2908	0.1033	0.1696		2015-07-07
61	1.00,0.50,0.33,2.00,2.00,1.00,0.33,2.00,3.00,3.00,1.00,4.00,0.50,0.50,0.25,1.00	559c17167d2a8	1.2	0.9111	1	1	0	4	0.1625	0.226	0.5069	0.1046		2015-07-07
63	1.00,3.00,3.00,0.33,1.00,0.33,0.33,3.00,1.00	559c17167d2a8	1.3	0.7472	1	1	0	3	0.5736	0.1399	0.2864			2015-07-07
65	1.00,0.33,2.00,3.00,1.00,3.00,0.50,0.33,1.00	559c17167d2a8	1.4	0.8823	1	1	0	3	0.2519	0.5889	0.1593			2015-07-07
52	1.00,3.00,3.00,3.00,0.33,0.33,1.00,0.50,0.25,0.50,0.33,2.00,1.00,0.50,0.25,0.33,4.00,2.00,1.00,0.33,3.00,2.00,4.00,3.00,1.00	559c174e829d7	0	0.5930	0	1	2	5	0.2521	0.0874	0.0993	0.1715	0.3897	2015-07-07
62	1.00,0.50,3.00,0.33,2.00,1.00,2.00,0.33,0.33,0.50,1.00,0.33,3.00,3.00,3.00,1.00	559c174e829d7	1.0	0.7163	1	1	0	4	0.1895	0.2262	0.1076	0.4768		2015-07-07
68	1.00,4.00,0.33,4.00,0.25,1.00,0.33,0.25,3.00,3.00,1.00,0.25,0.25,4.00,4.00,1.00	559c174e829d7	1.1	0.4338	0	1	1	4	0.3354	0.0608	0.2846	0.3191		2015-07-07
72	1.00,4.00,3.00,3.00,0.25,1.00,0.33,0.33,0.33,3.00,1.00,0.33,0.33,3.00,3.00,1.00	559c174e829d7	1.2	0.7626	1	1	1	4	0.4843	0.0846	0.1636	0.2675		2015-07-07
76	1.00,0.25,0.33,4.00,1.00,4.00,3.00,0.25,1.00	559c174e829d7	1.3	0.7851	1	1	1	3	0.1181	0.6389	0.2431			2015-07-07
78	1.00,0.25,4.00,4.00,1.00,0.25,0.25,4.00,1.00	559c174e829d7	1.4	1.0000	1	1	0	3	0.3333	0.3333	0.3333			2015-07-07
59	1.00,2.00,1.00,1.00,0.50,0.50,1.00,0.50,0.50,0.50,1.00,2.00,1.00,1.00,0.50,1.00,2.00,1.00,1.00,2.00,2.00,2.00,2.00,0.50,1.00	559c177d4d19a	0	0.6446	1	1	2	5	0.1894	0.1058	0.1894	0.2561	0.2593	2015-07-07
64	1.00,0.50,1.00,2.00,2.00,1.00,0.50,0.50,1.00,2.00,1.00,0.33,0.50,2.00,3.00,1.00	559c177d4d19a	1.0	0.1755	0	1	1	4	0.2542	0.2119	0.2137	0.3203		2015-07-07
66	1.00,2.00,1.00,0.50,0.50,1.00,0.50,0.50,1.00,2.00,1.00,0.50,2.00,2.00,2.00,1.00	559c177d4d19a	1.1	0.8174	1	1	0	4	0.2325	0.1413	0.2325	0.3937		2015-07-07
69	1.00,2.00,2.00,2.00,0.50,1.00,2.00,2.00,0.50,0.50,1.00,2.00,0.50,0.50,0.50,1.00	559c177d4d19a	1.2	0.7481	1	1	1	4	0.3873	0.2748	0.1981	0.1397		2015-07-07
71	1.00,2.00,2.00,0.50,1.00,2.00,0.50,0.50,1.00	559c177d4d19a	1.3	0.8227	1	1	0	3	0.4905	0.3119	0.1976			2015-07-07
73	1.00,0.50,0.50,2.00,1.00,2.00,2.00,0.50,1.00	559c177d4d19a	1.4	0.8227	1	1	0	3	0.1976	0.4905	0.3119			2015-07-07
10	1.00,0.33,0.33,0.33,0.33,3.00,1.00,0.33,1.00,0.33,3.00,3.00,1.00,3.00,3.00,3.00,1.00,0.33,1.00,0.50,3.00,3.00,0.33,2.00,1.00	559c17c55588b	0	0.6702	1	1	1	5	0.074	0.1389	0.4018	0.1454	0.24	2015-07-07
15	1.00,0.33,2.00,2.00,3.00,1.00,2.00,2.00,0.50,0.50,1.00,0.50,0.50,0.50,2.00,1.00	559c17c55588b	1.0	0.6101	1	1	0	4	0.2481	0.4195	0.137	0.1955		2015-07-07
22	1.00,3.00,3.00,3.00,0.33,1.00,0.33,0.50,0.33,3.00,1.00,3.00,0.33,2.00,0.33,1.00	559c17c55588b	1.1	0.7371	1	1	0	4	0.469	0.104	0.2786	0.1484		2015-07-07
30	1.00,4.00,4.00,2.00,0.25,1.00,2.00,2.00,0.25,0.50,1.00,0.50,0.50,0.50,2.00,1.00	559c17c55588b	1.2	0.7754	1	1	0	4	0.4937	0.2194	0.1026	0.1843		2015-07-07
34	1.00,0.50,0.25,2.00,1.00,0.25,4.00,4.00,1.00	559c17c55588b	1.3	0.9029	1	1	0	3	0.1335	0.2114	0.6551			2015-07-07
39	1.00,0.33,0.25,3.00,1.00,3.00,4.00,0.33,1.00	559c17c55588b	1.4	0.6510	1	1	0	3	0.1279	0.5603	0.3118			2015-07-07
60	1.00,4.00,3.00,3.00,2.00,0.25,1.00,0.50,0.50,1.00,0.33,2.00,1.00,2.00,0.50,0.33,2.00,0.50,1.00,0.50,0.50,1.00,2.00,2.00,1.00	559c1849ad7c4	0	0.8434	1	1	0	5	0.3991	0.1067	0.1632	0.1254	0.2056	2015-07-07
67	1.00,3.00,3.00,0.33,0.33,1.00,2.00,0.50,0.33,0.50,1.00,0.25,3.00,2.00,4.00,1.00	559c1849ad7c4	1.0	0.7850	1	1	1	4	0.284	0.1663	0.0921	0.4576		2015-07-07
70	1.00,0.50,2.00,2.00,2.00,1.00,2.00,2.00,0.50,0.50,1.00,2.00,0.50,0.50,0.50,1.00	559c1849ad7c4	1.1	0.7481	1	1	0	4	0.2748	0.3873	0.1981	0.1397		2015-07-07
74	1.00,3.00,3.00,0.50,0.33,1.00,2.00,0.50,0.33,0.50,1.00,0.50,2.00,2.00,2.00,1.00	559c1849ad7c4	1.2	0.7035	1	1	0	4	0.3273	0.1737	0.1232	0.3758		2015-07-07
75	1.00,3.00,2.00,0.33,1.00,0.50,0.50,2.00,1.00	559c1849ad7c4	1.3	0.9774	1	1	0	3	0.539	0.1638	0.2973			2015-07-07
77	1.00,4.00,4.00,0.25,1.00,0.50,0.25,2.00,1.00	559c1849ad7c4	1.4	0.9029	1	1	0	3	0.6551	0.1335	0.2114			2015-07-07
81	1.00,2.00,4.00,3.00,4.00,0.50,1.00,4.00,3.00,3.00,0.25,0.25,1.00,0.25,2.00,0.33,0.33,4.00,1.00,3.00,0.25,0.33,0.50,0.33,1.00	559d61960a3a9	0	0.7727	1	1	0	5	0.3878	0.2785	0.0864	0.1774	0.07	2015-07-08
82	1.00,2.00,2.00,0.50,0.50,1.00,0.50,0.50,0.50,2.00,1.00,0.33,2.00,2.00,3.00,1.00	559d61960a3a9	1.0	0.7469	1	1	0	4	0.2644	0.1398	0.1769	0.419		2015-07-08
86	1.00,0.33,2.00,2.00,3.00,1.00,3.00,2.00,0.50,0.33,1.00,0.33,0.50,0.50,3.00,1.00	559d61960a3a9	1.1	0.7138	1	1	0	4	0.2378	0.4425	0.1069	0.2129		2015-07-08
92	1.00,1.00,3.00,3.00,1.00,1.00,4.00,2.00,0.33,0.25,1.00,2.00,0.33,0.50,0.50,1.00	559d61960a3a9	1.2	0.7833	1	1	0	4	0.3666	0.3648	0.1459	0.1227		2015-07-08
95	1.00,0.33,0.33,3.00,1.00,0.33,3.00,3.00,1.00	559d61960a3a9	1.3	0.7472	1	1	0	3	0.1399	0.2864	0.5736			2015-07-08
100	1.00,1.00,0.33,1.00,1.00,0.33,3.00,3.00,1.00	559d61960a3a9	1.4	1.0000	1	1	0	3	0.2	0.2	0.6			2015-07-08
89	1.00,0.50,3.00,0.50,0.50,2.00,1.00,4.00,2.00,0.50,0.33,0.25,1.00,0.50,0.50,2.00,0.50,2.00,1.00,0.50,2.00,2.00,2.00,2.00,1.00	559d61a3c5562	0	0.6788	1	1	0	5	0.1508	0.2683	0.0875	0.1781	0.3153	2015-07-08
108	1.00,0.50,2.00,0.33,2.00,1.00,2.00,2.00,0.50,0.50,1.00,0.50,3.00,0.50,2.00,1.00	559d61a3c5562	1.0	0.6355	1	1	0	4	0.1816	0.3788	0.1376	0.302		2015-07-08
136	1.00,3.00,2.00,2.00,0.33,1.00,1.00,2.00,0.50,1.00,1.00,2.00,0.50,0.50,0.50,1.00	559d61a3c5562	1.1	0.7179	1	1	0	4	0.426	0.2082	0.226	0.1398		2015-07-08
144	1.00,2.00,2.00,2.00,0.50,1.00,0.50,0.50,0.50,2.00,1.00,0.50,0.50,2.00,2.00,1.00	559d61a3c5562	1.2	0.7481	1	1	0	4	0.3873	0.1397	0.1981	0.2748		2015-07-08
149	1.00,0.50,2.00,2.00,1.00,2.00,0.50,0.50,1.00	559d61a3c5562	1.3	0.8227	1	1	0	3	0.3119	0.4905	0.1976			2015-07-08
151	1.00,0.50,0.50,2.00,1.00,2.00,2.00,0.50,1.00	559d61a3c5562	1.4	0.8227	1	1	0	3	0.1976	0.4905	0.3119			2015-07-08
97	1.00,2.00,2.00,3.00,2.00,0.50,1.00,0.50,0.50,0.50,0.50,2.00,1.00,2.00,2.00,0.33,2.00,0.50,1.00,2.00,0.50,2.00,0.50,0.50,1.00	559d626579c9f	0	0.6613	1	1	0	5	0.343	0.1074	0.2347	0.1721	0.1429	2015-07-08
115	1.00,2.00,2.00,1.00,0.50,1.00,2.00,1.00,0.50,0.50,1.00,0.50,1.00,1.00,2.00,1.00	559d626579c9f	1.0	0.8395	1	1	0	4	0.3373	0.2401	0.1409	0.2817		2015-07-08
126	1.00,0.50,2.00,3.00,2.00,1.00,1.00,1.00,0.50,1.00,1.00,0.33,0.33,1.00,3.00,1.00	559d626579c9f	1.1	0.3007	0	1	1	4	0.313	0.2845	0.1554	0.2472		2015-07-08
133	1.00,3.00,2.00,2.00,0.33,1.00,0.33,0.50,0.50,3.00,1.00,2.00,0.50,2.00,0.50,1.00	559d626579c9f	1.2	0.8927	1	1	0	4	0.4118	0.108	0.293	0.1872		2015-07-08
139	1.00,2.00,2.00,0.50,1.00,0.50,0.50,2.00,1.00	559d626579c9f	1.3	0.8227	1	1	0	3	0.4905	0.1976	0.3119			2015-07-08
141	1.00,2.00,2.00,0.50,1.00,0.50,0.50,2.00,1.00	559d626579c9f	1.4	0.8227	1	1	0	3	0.4905	0.1976	0.3119			2015-07-08
94	1.00,2.00,2.00,2.00,1.00,0.50,1.00,2.00,1.00,1.00,0.50,0.50,1.00,1.00,0.50,0.50,1.00,1.00,1.00,1.00,1.00,1.00,2.00,1.00,1.00	559d62cd45ca3	0	0.7824	1	1	1	5	0.291	0.1927	0.1273	0.1677	0.2213	2015-07-08
105	1.00,1.00,3.00,2.00,1.00,1.00,2.00,2.00,0.33,0.50,1.00,1.00,0.50,0.50,1.00,1.00	559d62cd45ca3	1.0	0.9424	1	1	0	4	0.362	0.3263	0.1485	0.1632		2015-07-08
111	1.00,1.00,1.00,1.00,1.00,1.00,1.00,1.00,1.00,1.00,1.00,1.00,1.00,1.00,1.00,1.00	559d62cd45ca3	1.1	1.0000	1	1	0	4	0.25	0.25	0.25	0.25		2015-07-08
120	1.00,1.00,2.00,1.00,1.00,1.00,1.00,0.50,0.50,1.00,1.00,1.00,1.00,2.00,1.00,1.00	559d62cd45ca3	1.2	0.4812	0	1	1	4	0.2929	0.2071	0.2071	0.2929		2015-07-08
121	1.00,2.00,1.00,0.50,1.00,1.00,1.00,1.00,1.00	559d62cd45ca3	1.3	0.6733	1	1	0	3	0.4111	0.2611	0.3278			2015-07-08
122	1.00,1.00,1.00,1.00,1.00,1.00,1.00,1.00,1.00	559d62cd45ca3	1.4	1.0000	1	1	0	3	0.3333	0.3333	0.3333			2015-07-08
83	1.00,2.00,1.00,2.00,0.50,0.50,1.00,0.33,0.50,0.33,1.00,3.00,1.00,3.00,3.00,0.50,2.00,0.33,1.00,0.50,2.00,3.00,0.33,2.00,1.00	559d689e345a3	0	0.7454	1	1	0	5	0.2088	0.0847	0.3443	0.1209	0.2413	2015-07-08
88	1.00,3.00,3.00,2.00,0.33,1.00,2.00,2.00,0.33,0.50,1.00,0.50,0.50,0.50,2.00,1.00	559d689e345a3	1.0	0.7810	1	1	0	4	0.45	0.2419	0.1174	0.1906		2015-07-08
96	1.00,0.50,0.50,2.00,2.00,1.00,0.50,2.00,2.00,2.00,1.00,2.00,0.50,0.50,0.50,1.00	559d689e345a3	1.1	0.7481	1	1	0	4	0.1981	0.2748	0.3873	0.1397		2015-07-08
106	1.00,3.00,3.00,0.50,0.33,1.00,0.33,0.33,0.33,3.00,1.00,0.50,2.00,3.00,2.00,1.00	559d689e345a3	1.2	0.7431	1	1	0	4	0.3152	0.0966	0.1908	0.3975		2015-07-08
107	1.00,2.00,2.00,0.50,1.00,0.50,0.50,2.00,1.00	559d689e345a3	1.3	0.8227	1	1	0	3	0.4905	0.1976	0.3119			2015-07-08
113	1.00,1.00,0.50,1.00,1.00,0.50,2.00,2.00,1.00	559d689e345a3	1.4	1.0000	1	1	0	3	0.25	0.25	0.5			2015-07-08
131	1.00,2.00,2.00,0.50,0.50,0.50,1.00,0.50,0.50,0.50,0.50,2.00,1.00,0.50,2.00,2.00,2.00,2.00,1.00,2.00,2.00,2.00,0.50,0.50,1.00	559d68b54722c		0.5612	0	1	2	5	0.1944	0.1056	0.1944	0.3111	0.1944	2015-07-08
146	1.00,2.00,2.00,0.50,0.50,1.00,2.00,0.50,0.50,0.50,1.00,0.50,2.00,2.00,2.00,1.00	559d68b54722c	1.0	0.7481	1	1	0	4	0.2748	0.1981	0.1397	0.3873		2015-07-08
157	1.00,0.50,0.50,1.00,2.00,1.00,2.00,2.00,2.00,0.50,1.00,2.00,1.00,0.50,0.50,1.00	559d68b54722c	1.1	0.8504	1	1	1	4	0.1646	0.3917	0.2792	0.1646		2015-07-08
162	1.00,3.00,2.00,2.00,0.33,1.00,2.00,0.50,0.50,0.50,1.00,0.50,0.50,2.00,2.00,1.00	559d68b54722c	1.2	0.7469	1	1	0	4	0.419	0.1769	0.1398	0.2644		2015-07-08
163	1.00,2.00,2.00,0.50,1.00,2.00,0.50,0.50,1.00	559d68b54722c	1.3	0.8227	1	1	0	3	0.4905	0.3119	0.1976			2015-07-08
164	1.00,2.00,2.00,0.50,1.00,2.00,0.50,0.50,1.00	559d68b54722c	1.4	0.8227	1	1	0	3	0.4905	0.3119	0.1976			2015-07-08
84	1.00,3.00,2.00,0.50,2.00,0.33,1.00,3.00,0.50,1.00,0.50,0.33,1.00,0.33,0.33,2.00,2.00,3.00,1.00,3.00,0.50,1.00,3.00,0.33,1.00	559d68d902cc3	0	0.6700	1	1	0	5	0.2534	0.1574	0.0829	0.3537	0.1526	2015-07-08
91	1.00,0.50,0.50,1.00,2.00,1.00,2.00,2.00,2.00,0.50,1.00,2.00,1.00,0.50,0.50,1.00	559d68d902cc3	1.0	0.8504	1	1	0	4	0.1646	0.3917	0.2792	0.1646		2015-07-08
101	1.00,0.50,0.50,0.33,2.00,1.00,3.00,3.00,2.00,0.33,1.00,0.50,3.00,0.33,2.00,1.00	559d68d902cc3	1.1	0.6295	1	1	0	4	0.1254	0.4484	0.1653	0.2609		2015-07-08
109	1.00,2.00,2.00,2.00,0.50,1.00,0.50,0.33,0.50,2.00,1.00,0.50,0.50,3.00,2.00,1.00	559d68d902cc3	1.2	0.7443	1	1	0	4	0.3838	0.1257	0.1906	0.2999		2015-07-08
116	1.00,0.33,0.33,3.00,1.00,0.33,3.00,3.00,1.00	559d68d902cc3	1.3	0.7472	1	1	0	3	0.1399	0.2864	0.5736			2015-07-08
119	1.00,0.33,0.33,3.00,1.00,0.50,3.00,2.00,1.00	559d68d902cc3	1.4	0.8833	1	1	0	3	0.1416	0.3338	0.5247			2015-07-08
110	1.00,3.00,3.00,3.00,3.00,0.33,1.00,4.00,1.00,1.00,0.33,0.25,1.00,0.25,0.50,0.33,1.00,4.00,1.00,1.00,0.33,1.00,2.00,1.00,1.00	559d68e49d542	0	0.6533	1	1	0	5	0.4129	0.1805	0.0742	0.1805	0.1519	2015-07-08
132	1.00,1.00,1.00,3.00,1.00,1.00,0.33,3.00,1.00,3.00,1.00,3.00,0.33,0.33,0.33,1.00	559d68e49d542	1.0	0.7943	1	1	1	4	0.2906	0.2281	0.3844	0.0969		2015-07-08
142	1.00,1.00,0.50,0.33,1.00,1.00,0.33,1.00,2.00,3.00,1.00,3.00,3.00,1.00,0.33,1.00	559d68e49d542	1.1	0.6518	1	1	1	4	0.1507	0.1627	0.4524	0.2341		2015-07-08
148	1.00,4.00,4.00,4.00,0.25,1.00,0.33,0.33,0.25,3.00,1.00,0.33,0.25,3.00,3.00,1.00	559d68e49d542	1.2	0.6942	1	1	0	4	0.5302	0.0831	0.1486	0.238		2015-07-08
150	1.00,4.00,0.33,0.25,1.00,3.00,3.00,0.33,1.00	559d68e49d542	1.3	0.0288	0	1	1	3	0.3541	0.3129	0.3331			2015-07-08
154	1.00,3.00,3.00,0.33,1.00,3.00,0.33,0.33,1.00	559d68e49d542	1.4	0.7472	1	1	0	3	0.5736	0.2864	0.1399			2015-07-08
112	1.00,2.00,3.00,0.33,0.33,0.50,1.00,0.33,0.33,0.25,0.33,3.00,1.00,0.33,0.25,3.00,3.00,3.00,1.00,3.00,3.00,4.00,4.00,0.33,1.00	559d68f4de0bb	0	0.6356	1	1	0	5	0.1516	0.0729	0.1112	0.3855	0.2787	2015-07-08
127	1.00,3.00,3.00,2.00,0.33,1.00,2.00,2.00,0.33,0.50,1.00,0.33,0.50,0.50,3.00,1.00	559d68f4de0bb	1.0	0.7138	1	1	0	4	0.4425	0.2378	0.1069	0.2129		2015-07-08
137	1.00,3.00,2.00,2.00,0.33,1.00,2.00,1.00,0.50,0.50,1.00,1.00,0.50,1.00,1.00,1.00	559d68f4de0bb	1.1	0.7334	1	1	1	4	0.4268	0.2145	0.168	0.1907		2015-07-08
143	1.00,0.50,2.00,2.00,2.00,1.00,2.00,2.00,0.50,0.50,1.00,0.50,0.50,0.50,2.00,1.00	559d68f4de0bb	1.2	0.7481	1	1	0	4	0.2748	0.3873	0.1397	0.1981		2015-07-08
153	1.00,2.00,2.00,0.50,1.00,1.00,0.50,1.00,1.00	559d68f4de0bb	1.3	1.0000	1	1	0	3	0.5	0.25	0.25			2015-07-08
155	1.00,0.50,0.33,2.00,1.00,0.50,3.00,2.00,1.00	559d68f4de0bb	1.4	0.9774	1	1	0	3	0.1638	0.2973	0.539			2015-07-08
85	1.00,1.00,3.00,1.00,1.00,1.00,1.00,3.00,2.00,2.00,0.33,0.33,1.00,0.50,0.50,1.00,0.50,2.00,1.00,2.00,1.00,0.50,2.00,0.50,1.00	559d68f5bddf4	0	0.8674	1	1	0	5	0.2315	0.3022	0.089	0.2141	0.1633	2015-07-08
87	1.00,3.00,2.00,2.00,0.33,1.00,0.50,0.50,0.50,2.00,1.00,1.00,0.50,2.00,1.00,1.00	559d68f5bddf4	1.0	0.9705	1	1	0	4	0.4231	0.1225	0.2272	0.2272		2015-07-08
90	1.00,0.33,0.33,1.00,3.00,1.00,1.00,2.00,3.00,1.00,1.00,2.00,1.00,0.50,0.50,1.00	559d68f5bddf4	1.1	0.9679	1	1	0	4	0.1317	0.3536	0.3536	0.1612		2015-07-08
99	1.00,0.33,2.00,1.00,3.00,1.00,3.00,3.00,0.50,0.33,1.00,0.50,1.00,0.33,2.00,1.00	559d68f5bddf4	1.2	0.8678	1	1	0	4	0.1951	0.4915	0.1184	0.1951		2015-07-08
102	1.00,0.33,0.50,3.00,1.00,2.00,2.00,0.50,1.00	559d68f5bddf4	1.3	0.9774	1	1	0	3	0.1638	0.539	0.2973			2015-07-08
104	1.00,2.00,0.33,0.50,1.00,0.33,3.00,3.00,1.00	559d68f5bddf4	1.4	0.8823	1	1	0	3	0.2519	0.1593	0.5889			2015-07-08
98	1.00,4.00,1.00,4.00,3.00,0.25,1.00,1.00,0.50,1.00,1.00,1.00,1.00,0.50,1.00,0.25,2.00,2.00,1.00,2.00,0.33,1.00,1.00,0.50,1.00	559d690244b84	0	0.6694	1	1	0	5	0.3909	0.1136	0.1665	0.2095	0.1195	2015-07-08
117	1.00,3.00,2.00,1.00,0.33,1.00,1.00,1.00,0.50,1.00,1.00,1.00,1.00,1.00,1.00,1.00	559d690244b84	1.0	0.7192	1	1	0	4	0.3757	0.1836	0.1983	0.2424		2015-07-08
125	1.00,2.00,1.00,1.00,0.50,1.00,1.00,1.00,1.00,1.00,1.00,1.00,1.00,1.00,1.00,1.00	559d690244b84	1.1	0.4950	0	1	1	4	0.2964	0.2107	0.2464	0.2464		2015-07-08
129	1.00,1.00,1.00,1.00,1.00,1.00,1.00,1.00,1.00,1.00,1.00,1.00,1.00,1.00,1.00,1.00	559d690244b84	1.2	1.0000	1	1	0	4	0.25	0.25	0.25	0.25		2015-07-08
134	1.00,2.00,1.00,0.50,1.00,1.00,1.00,1.00,1.00	559d690244b84	1.3	0.6733	1	1	0	3	0.4111	0.2611	0.3278			2015-07-08
135	1.00,1.00,1.00,1.00,1.00,1.00,1.00,1.00,1.00	559d690244b84	1.4	1.0000	1	1	0	3	0.3333	0.3333	0.3333			2015-07-08
118	1.00,3.00,2.00,3.00,3.00,0.33,1.00,2.00,2.00,3.00,0.50,0.50,1.00,0.50,1.00,0.33,0.50,2.00,1.00,1.00,0.33,0.33,1.00,1.00,1.00	559d6904242d1	0	0.7332	1	1	0	5	0.3892	0.2342	0.1193	0.1443	0.1131	2015-07-08
138	1.00,3.00,2.00,1.00,0.33,1.00,0.50,0.50,0.50,2.00,1.00,1.00,1.00,2.00,1.00,1.00	559d6904242d1	1.0	0.9344	1	1	0	4	0.3645	0.1242	0.2336	0.2777		2015-07-08
145	1.00,0.50,4.00,3.00,2.00,1.00,4.00,4.00,0.25,0.25,1.00,4.00,0.33,0.25,0.25,1.00	559d6904242d1	1.1	0.6650	1	1	0	4	0.3029	0.456	0.1591	0.0821		2015-07-08
152	1.00,2.00,2.00,1.00,0.50,1.00,1.00,1.00,0.50,1.00,1.00,0.50,1.00,1.00,2.00,1.00	559d6904242d1	1.2	0.8352	1	1	0	4	0.3381	0.2048	0.169	0.2881		2015-07-08
158	1.00,2.00,2.00,0.50,1.00,1.00,0.50,1.00,1.00	559d6904242d1	1.3	1.0000	1	1	0	3	0.5	0.25	0.25			2015-07-08
160	1.00,2.00,1.00,0.50,1.00,0.50,1.00,2.00,1.00	559d6904242d1	1.4	1.0000	1	1	0	3	0.4	0.2	0.4			2015-07-08
123	1.00,0.50,0.50,0.50,0.50,2.00,1.00,0.50,0.50,0.50,2.00,2.00,1.00,1.00,2.00,2.00,2.00,1.00,1.00,0.50,2.00,2.00,0.50,2.00,1.00	559d69210aaf5	0	0.6958	1	1	0	5	0.1063	0.1419	0.2838	0.2171	0.2508	2015-07-08
140	1.00,0.50,0.50,0.33,2.00,1.00,0.50,0.50,2.00,2.00,1.00,0.33,3.00,2.00,3.00,1.00	559d69210aaf5	1.0	0.7810	1	1	0	4	0.1174	0.1906	0.2419	0.45		2015-07-08
147	1.00,3.00,0.50,2.00,0.33,1.00,0.50,2.00,2.00,2.00,1.00,2.00,0.50,0.50,0.50,1.00	559d69210aaf5	1.1	0.6355	1	1	0	4	0.302	0.1816	0.3788	0.1376		2015-07-08
156	1.00,4.00,3.00,2.00,0.25,1.00,0.33,0.33,0.33,3.00,1.00,0.50,0.50,3.00,2.00,1.00	559d69210aaf5	1.2	0.8824	1	1	0	4	0.4598	0.0876	0.1803	0.2723		2015-07-08
159	1.00,3.00,0.50,0.33,1.00,0.50,2.00,2.00,1.00	559d69210aaf5	1.3	0.6857	1	1	0	3	0.35	0.1722	0.4778			2015-07-08
161	1.00,0.50,0.50,2.00,1.00,0.50,2.00,2.00,1.00	559d69210aaf5	1.4	0.8227	1	1	0	3	0.1976	0.3119	0.4905			2015-07-08
93	1.00,2.00,3.00,0.50,0.50,0.50,1.00,2.00,0.25,0.33,0.33,0.50,1.00,0.25,0.50,2.00,4.00,4.00,1.00,3.00,2.00,3.00,2.00,0.33,1.00	559d696496f6d	0	0.8298	1	1	0	5	0.184	0.1035	0.0778	0.4096	0.2251	2015-07-08
103	1.00,3.00,4.00,0.50,0.33,1.00,3.00,0.50,0.25,0.33,1.00,0.25,2.00,2.00,4.00,1.00	559d696496f6d	1.0	0.8608	1	1	0	4	0.3271	0.1808	0.0792	0.4129		2015-07-08
114	1.00,0.50,3.00,3.00,2.00,1.00,2.00,3.00,0.33,0.50,1.00,2.00,0.33,0.33,0.50,1.00	559d696496f6d	1.1	0.8196	1	1	1	4	0.3205	0.4038	0.1703	0.1055		2015-07-08
124	1.00,0.33,2.00,2.00,3.00,1.00,2.00,3.00,0.50,0.50,1.00,0.50,0.50,0.33,2.00,1.00	559d696496f6d	1.2	0.6734	1	1	0	4	0.2368	0.4522	0.1376	0.1734		2015-07-08
128	1.00,0.50,2.00,2.00,1.00,3.00,0.50,0.33,1.00	559d696496f6d	1.3	0.9774	1	1	0	3	0.2973	0.539	0.1638			2015-07-08
130	1.00,2.00,0.50,0.50,1.00,0.50,2.00,2.00,1.00	559d696496f6d	1.4	0.8227	1	1	0	3	0.3119	0.1976	0.4905			2015-07-08
180	1.00,2.00,3.00,1.00,1.00,0.50,1.00,2.00,0.50,0.50,0.33,0.50,1.00,0.33,0.33,1.00,2.00,3.00,1.00,1.00,1.00,2.00,3.00,1.00,1.00	55a7e96da2047	0	0.9868	1	1	0	5	0.2599	0.1383	0.0822	0.2599	0.2599	2015-07-16
187	1.00,2.00,2.00,2.00,0.50,1.00,1.00,1.00,0.50,1.00,1.00,1.00,0.50,1.00,1.00,1.00	55a7e96da2047	1.0	1.0000	1	1	0	4	0.4	0.2	0.2	0.2		2015-07-16
197	1.00,2.00,2.00,1.00,0.50,1.00,0.50,0.50,0.50,2.00,1.00,0.50,1.00,2.00,2.00,1.00	55a7e96da2047	1.1	0.8515	1	1	0	4	0.329	0.1418	0.2002	0.329		2015-07-16
211	1.00,2.00,2.00,2.00,0.50,1.00,1.00,1.00,0.50,1.00,1.00,1.00,0.50,1.00,1.00,1.00	55a7e96da2047	1.2	1.0000	1	1	0	4	0.4	0.2	0.2	0.2		2015-07-16
220	1.00,2.00,2.00,0.50,1.00,0.50,0.50,2.00,1.00	55a7e96da2047	1.3	0.8227	1	1	0	3	0.4905	0.1976	0.3119			2015-07-16
225	1.00,2.00,0.50,0.50,1.00,0.50,2.00,2.00,1.00	55a7e96da2047	1.4	0.8227	1	1	0	3	0.3119	0.1976	0.4905			2015-07-16
223	1.00,2.00,2.00,0.33,0.50,0.50,1.00,3.00,0.33,2.00,0.50,0.33,1.00,0.33,0.50,3.00,3.00,3.00,1.00,2.00,2.00,0.50,2.00,0.50,1.00	55a7ecd27b85b	0	0.6657	1	1	0	5	0.1668	0.1914	0.0856	0.3747	0.1815	2015-07-16
240	1.00,0.33,2.00,2.00,3.00,1.00,3.00,2.00,0.50,0.33,1.00,0.50,0.50,0.50,2.00,1.00	55a7ecd27b85b	1.0	0.7810	1	1	0	4	0.2419	0.45	0.1174	0.1906		2015-07-16
247	1.00,3.00,3.00,3.00,0.33,1.00,0.50,1.00,0.33,2.00,1.00,1.00,0.33,1.00,1.00,1.00	55a7ecd27b85b	1.1	0.9232	1	1	0	4	0.4935	0.1418	0.2002	0.1645		2015-07-16
254	1.00,4.00,4.00,4.00,0.25,1.00,3.00,3.00,0.25,0.33,1.00,0.33,0.25,0.33,3.00,1.00	55a7ecd27b85b	1.2	0.6942	1	1	0	4	0.5302	0.238	0.0831	0.1486		2015-07-16
256	1.00,0.33,0.33,3.00,1.00,0.33,3.00,3.00,1.00	55a7ecd27b85b	1.3	0.7472	1	1	0	3	0.1399	0.2864	0.5736			2015-07-16
257	1.00,1.00,1.00,1.00,1.00,1.00,1.00,1.00,1.00	55a7ecd27b85b	1.4	1.0000	1	1	0	3	0.3333	0.3333	0.3333			2015-07-16
165	1.00,1.00,2.00,0.50,0.33,1.00,1.00,2.00,0.50,0.50,0.50,0.50,1.00,0.50,0.33,2.00,2.00,2.00,1.00,3.00,3.00,2.00,3.00,0.33,1.00	55a7ecd666057	0	0.6102	1	1	1	5	0.1456	0.1521	0.0969	0.3416	0.2638	2015-07-16
166	1.00,0.50,0.50,0.50,2.00,1.00,2.00,2.00,2.00,0.50,1.00,2.00,2.00,0.50,0.50,1.00	55a7ecd666057	1.0	0.7481	1	1	0	4	0.1397	0.3873	0.2748	0.1981		2015-07-16
167	1.00,0.50,0.50,0.50,2.00,1.00,2.00,2.00,2.00,0.50,1.00,2.00,2.00,0.50,0.50,1.00	55a7ecd666057	1.1	0.7481	1	1	0	4	0.1397	0.3873	0.2748	0.1981		2015-07-16
168	1.00,0.50,0.50,0.50,2.00,1.00,0.50,0.50,2.00,2.00,1.00,1.00,2.00,2.00,1.00,1.00	55a7ecd666057	1.2	0.8515	1	1	0	4	0.1418	0.2002	0.329	0.329		2015-07-16
169	1.00,1.00,1.00,1.00,1.00,0.33,1.00,3.00,1.00	55a7ecd666057	1.3	0.6844	1	1	0	3	0.3206	0.2254	0.454			2015-07-16
170	1.00,1.00,1.00,1.00,1.00,1.00,1.00,1.00,1.00	55a7ecd666057	1.4	1.0000	1	1	0	3	0.3333	0.3333	0.3333			2015-07-16
171	1.00,4.00,4.00,4.00,1.00,0.25,1.00,1.00,1.00,1.00,0.25,1.00,1.00,1.00,0.33,0.25,1.00,1.00,1.00,1.00,1.00,1.00,3.00,1.00,1.00	55a7ece72edbe	0	0.8485	1	1	1	5	0.3989	0.1343	0.1036	0.1343	0.2289	2015-07-16
172	1.00,0.25,0.25,0.25,4.00,1.00,4.00,0.25,4.00,0.25,1.00,0.25,4.00,4.00,4.00,1.00	55a7ece72edbe	1.0	0.5838	0	1	1	4	0.0731	0.2662	0.151	0.5097		2015-07-16
173	1.00,0.25,0.25,0.25,4.00,1.00,0.25,0.33,4.00,4.00,1.00,0.50,4.00,3.00,2.00,1.00	55a7ece72edbe	1.1	0.7216	1	1	0	4	0.0747	0.1651	0.3296	0.4307		2015-07-16
174	1.00,1.00,0.50,0.50,1.00,1.00,0.50,4.00,2.00,2.00,1.00,4.00,2.00,0.25,0.25,1.00	55a7ece72edbe	1.2	0.6210	1	1	0	4	0.1692	0.2613	0.4174	0.1521		2015-07-16
175	1.00,4.00,0.25,0.25,1.00,0.25,4.00,4.00,1.00	55a7ece72edbe	1.3	0.6912	1	1	0	3	0.2672	0.1085	0.6243			2015-07-16
178	1.00,4.00,4.00,0.25,1.00,2.00,0.25,0.50,1.00	55a7ece72edbe	1.4	0.9029	1	1	0	3	0.6551	0.2114	0.1335			2015-07-16
184	1.00,2.00,3.00,3.00,2.00,0.50,1.00,3.00,2.00,1.00,0.33,0.33,1.00,0.50,0.50,0.33,0.50,2.00,1.00,2.00,0.50,1.00,2.00,0.50,1.00	55a7ecfa0bd5f	0	0.7760	1	1	0	5	0.3596	0.2213	0.0866	0.1722	0.1603	2015-07-16
209	1.00,3.00,3.00,2.00,0.33,1.00,1.00,1.00,0.33,1.00,1.00,0.50,0.50,1.00,2.00,1.00	55a7ecfa0bd5f	1.0	0.9467	1	1	0	4	0.4586	0.1714	0.1436	0.2263		2015-07-16
224	1.00,0.50,1.00,1.00,2.00,1.00,2.00,1.00,1.00,0.50,1.00,1.00,1.00,1.00,1.00,1.00	55a7ecfa0bd5f	1.1	0.7604	1	1	0	4	0.2042	0.3458	0.2042	0.2458		2015-07-16
232	1.00,2.00,0.50,0.50,0.50,1.00,0.50,0.50,2.00,2.00,1.00,1.00,2.00,2.00,1.00,1.00	55a7ecfa0bd5f	1.2	0.8515	1	1	0	4	0.2002	0.1418	0.329	0.329		2015-07-16
239	1.00,2.00,2.00,0.50,1.00,1.00,0.50,1.00,1.00	55a7ecfa0bd5f	1.3	1.0000	1	1	0	3	0.5	0.25	0.25			2015-07-16
241	1.00,1.00,0.50,1.00,1.00,0.50,2.00,2.00,1.00	55a7ecfa0bd5f	1.4	1.0000	1	1	0	3	0.25	0.25	0.5			2015-07-16
181	1.00,0.50,2.00,0.33,1.00,2.00,1.00,2.00,1.00,1.00,0.50,0.50,1.00,0.50,0.50,3.00,1.00,2.00,1.00,1.00,1.00,1.00,2.00,1.00,1.00	55a7ed200f1d4	0	0.7114	1	1	0	5	0.1579	0.2444	0.1089	0.2711	0.2177	2015-07-16
188	1.00,3.00,2.00,1.00,0.33,1.00,2.00,1.00,0.50,0.50,1.00,0.50,1.00,1.00,2.00,1.00	55a7ed200f1d4	1.0	0.6510	1	1	0	4	0.3675	0.2177	0.1383	0.2765		2015-07-16
196	1.00,0.33,0.33,0.33,3.00,1.00,0.50,0.50,3.00,2.00,1.00,0.50,3.00,2.00,2.00,1.00	55a7ed200f1d4	1.1	0.8243	1	1	0	4	0.0981	0.2081	0.2875	0.4063		2015-07-16
207	1.00,2.00,2.00,2.00,0.50,1.00,1.00,0.50,0.50,1.00,1.00,2.00,0.50,2.00,0.50,1.00	55a7ed200f1d4	1.2	0.6577	1	1	0	4	0.3854	0.1699	0.2381	0.2066		2015-07-16
215	1.00,2.00,2.00,0.50,1.00,0.50,0.50,2.00,1.00	55a7ed200f1d4	1.3	0.8227	1	1	0	3	0.4905	0.1976	0.3119			2015-07-16
219	1.00,0.50,0.50,2.00,1.00,0.50,2.00,2.00,1.00	55a7ed200f1d4	1.4	0.8227	1	1	0	3	0.1976	0.3119	0.4905			2015-07-16
182	1.00,0.33,0.50,0.50,0.50,3.00,1.00,3.00,0.50,2.00,2.00,0.33,1.00,0.33,0.50,2.00,2.00,3.00,1.00,3.00,2.00,0.50,2.00,0.33,1.00	55a7ed2b45916	0	0.7442	1	1	0	5	0.0983	0.2658	0.1163	0.3599	0.1597	2015-07-16
198	1.00,2.00,1.00,0.50,0.50,1.00,1.00,1.00,1.00,1.00,1.00,1.00,2.00,1.00,1.00,1.00	55a7ed2b45916	1.0	0.2176	0	1	1	4	0.2538	0.2117	0.2395	0.295		2015-07-16
213	1.00,3.00,3.00,2.00,0.33,1.00,0.50,0.33,0.33,2.00,1.00,0.33,0.50,3.00,3.00,1.00	55a7ed2b45916	1.1	0.8449	1	1	0	4	0.4351	0.1056	0.1501	0.3092		2015-07-16
227	1.00,3.00,2.00,3.00,0.33,1.00,1.00,0.50,0.50,1.00,1.00,0.50,0.33,2.00,2.00,1.00	55a7ed2b45916	1.2	0.7918	1	1	0	4	0.4559	0.1408	0.1601	0.2432		2015-07-16
231	1.00,3.00,2.00,0.33,1.00,0.33,0.50,3.00,1.00	55a7ed2b45916	1.3	0.8833	1	1	0	3	0.5247	0.1416	0.3338			2015-07-16
234	1.00,1.00,1.00,1.00,1.00,1.00,1.00,1.00,1.00	55a7ed2b45916	1.4	1.0000	1	1	0	3	0.3333	0.3333	0.3333			2015-07-16
208	1.00,3.00,3.00,0.25,2.00,0.33,1.00,2.00,0.33,0.33,0.33,0.50,1.00,0.33,0.33,4.00,3.00,3.00,1.00,2.00,0.50,3.00,3.00,0.50,1.00	55a7f0dd2450b		0.6452	1	1	1	5	0.2309	0.1025	0.0764	0.3902	0.2	2015-07-16
228	1.00,3.00,2.00,1.00,0.33,1.00,2.00,0.50,0.50,0.50,1.00,0.50,1.00,2.00,2.00,1.00	55a7f0dd2450b	1.0	0.7613	1	1	0	4	0.3584	0.181	0.1407	0.3199		2015-07-16
237	1.00,0.50,3.00,0.33,2.00,1.00,3.00,2.00,0.33,0.33,1.00,0.50,3.00,0.50,2.00,1.00	55a7f0dd2450b	1.1	0.6690	1	1	0	4	0.1981	0.3999	0.1093	0.2928		2015-07-16
246	1.00,2.00,2.00,2.00,0.50,1.00,2.00,2.00,0.50,0.50,1.00,0.33,0.50,0.50,3.00,1.00	55a7f0dd2450b	1.2	0.6194	1	1	0	4	0.3812	0.2687	0.1281	0.2219		2015-07-16
250	1.00,0.33,0.33,3.00,1.00,3.00,3.00,0.33,1.00	55a7f0dd2450b	1.3	0.7472	1	1	0	3	0.1399	0.5736	0.2864			2015-07-16
252	1.00,0.50,0.33,2.00,1.00,0.50,3.00,2.00,1.00	55a7f0dd2450b	1.4	0.9774	1	1	0	3	0.1638	0.2973	0.539			2015-07-16
191	1.00,0.33,2.00,0.33,0.50,3.00,1.00,2.00,0.33,1.00,0.50,0.50,1.00,0.50,1.00,3.00,3.00,2.00,1.00,2.00,2.00,1.00,1.00,0.50,1.00	55a7f210a0cf0	0	0.6547	1	1	2	5	0.1257	0.2088	0.1265	0.3637	0.1753	2015-07-16
201	1.00,3.00,1.00,0.50,0.33,1.00,0.50,0.33,1.00,2.00,1.00,1.00,2.00,3.00,1.00,1.00	55a7f210a0cf0	1.0	0.8753	1	1	0	4	0.2566	0.1121	0.2729	0.3584		2015-07-16
221	1.00,2.00,0.50,1.00,0.50,1.00,2.00,0.33,2.00,0.50,1.00,1.00,1.00,3.00,1.00,1.00	55a7f210a0cf0	1.1	0.2456	0	1	1	4	0.2353	0.2024	0.2609	0.3015		2015-07-16
233	1.00,2.00,0.50,2.00,0.50,1.00,0.33,2.00,2.00,3.00,1.00,0.50,0.50,0.50,2.00,1.00	55a7f210a0cf0	1.2	0.2607	0	1	1	4	0.2629	0.1824	0.3283	0.2264		2015-07-16
238	1.00,0.33,0.50,3.00,1.00,2.00,2.00,0.50,1.00	55a7f210a0cf0	1.3	0.9774	1	1	0	3	0.1638	0.539	0.2973			2015-07-16
242	1.00,0.33,0.33,3.00,1.00,3.00,3.00,0.33,1.00	55a7f210a0cf0	1.4	0.7472	1	1	0	3	0.1399	0.5736	0.2864			2015-07-16
177	1.00,2.00,2.00,3.00,2.00,0.50,1.00,2.00,2.00,1.00,0.50,0.50,1.00,1.00,0.50,0.33,0.50,1.00,1.00,0.50,0.50,1.00,2.00,2.00,1.00	55a7f26eec8e9	0	0.9044	1	1	0	5	0.3473	0.2097	0.1225	0.1108	0.2097	2015-07-16
192	1.00,2.00,2.00,1.00,0.50,1.00,1.00,2.00,0.50,1.00,1.00,0.50,1.00,0.50,2.00,1.00	55a7f26eec8e9	1.0	0.4722	0	1	1	4	0.3333	0.25	0.1667	0.25		2015-07-16
205	1.00,1.00,1.00,0.50,1.00,1.00,2.00,1.00,1.00,0.50,1.00,0.50,2.00,1.00,2.00,1.00	55a7f26eec8e9	1.1	0.8352	1	1	0	4	0.2048	0.2881	0.169	0.3381		2015-07-16
222	1.00,3.00,2.00,1.00,0.33,1.00,1.00,0.50,0.50,1.00,1.00,1.00,1.00,2.00,1.00,1.00	55a7f26eec8e9	1.2	0.8691	1	1	0	4	0.3668	0.1508	0.2013	0.2811		2015-07-16
229	1.00,3.00,0.50,0.33,1.00,0.50,2.00,2.00,1.00	55a7f26eec8e9	1.3	0.6857	1	1	0	3	0.35	0.1722	0.4778			2015-07-16
230	1.00,3.00,3.00,0.33,1.00,1.00,0.33,1.00,1.00	55a7f26eec8e9	1.4	1.0000	1	1	0	3	0.6	0.2	0.2			2015-07-16
176	1.00,2.00,0.25,0.33,0.25,0.50,1.00,0.25,3.00,4.00,4.00,4.00,1.00,3.00,0.33,3.00,0.33,0.33,1.00,0.25,4.00,0.25,3.00,4.00,1.00	55a7f2701c301	0	0.3890	0	1	2	5	0.0935	0.2348	0.2752	0.0968	0.2996	2015-07-16
183	1.00,1.00,1.00,1.00,1.00,1.00,1.00,1.00,1.00,1.00,1.00,1.00,1.00,1.00,1.00,1.00	55a7f2701c301	1.0	1.0000	1	1	0	4	0.25	0.25	0.25	0.25		2015-07-16
186	1.00,0.25,0.25,1.00,4.00,1.00,1.00,1.00,4.00,1.00,1.00,1.00,1.00,1.00,1.00,1.00	55a7f2701c301	1.1	0.7673	1	1	0	4	0.126	0.3163	0.3163	0.2413		2015-07-16
194	1.00,1.00,1.00,1.00,1.00,1.00,1.00,4.00,1.00,1.00,1.00,1.00,1.00,0.25,1.00,1.00	55a7f2701c301	1.2	0.4955	0	1	1	4	0.2376	0.3448	0.2376	0.1799		2015-07-16
195	1.00,1.00,1.00,1.00,1.00,1.00,1.00,1.00,1.00	55a7f2701c301	1.3	1.0000	1	1	0	3	0.3333	0.3333	0.3333			2015-07-16
199	1.00,1.00,1.00,1.00,1.00,1.00,1.00,1.00,1.00	55a7f2701c301	1.4	1.0000	1	1	0	3	0.3333	0.3333	0.3333			2015-07-16
190	1.00,2.00,2.00,2.00,2.00,0.50,1.00,0.33,0.50,0.33,0.50,3.00,1.00,2.00,1.00,0.50,2.00,0.50,1.00,2.00,0.50,3.00,1.00,0.50,1.00	55a7f27ea1f68		0.6375	1	1	0	5	0.3156	0.0925	0.2275	0.1869	0.1775	2015-07-16
200	1.00,1.00,2.00,2.00,1.00,1.00,2.00,2.00,0.50,0.50,1.00,1.00,0.50,0.50,1.00,1.00	55a7f27ea1f68	1.0	1.0000	1	1	0	4	0.3333	0.3333	0.1667	0.1667		2015-07-16
203	1.00,0.25,0.33,1.00,4.00,1.00,1.00,1.00,3.00,1.00,1.00,1.00,1.00,1.00,1.00,1.00	55a7f27ea1f68	1.1	0.7503	1	1	0	4	0.1345	0.3255	0.2978	0.2422		2015-07-16
210	1.00,1.00,2.00,1.00,1.00,1.00,1.00,1.00,0.50,1.00,1.00,1.00,1.00,1.00,1.00,1.00	55a7f27ea1f68	1.2	0.4950	0	1	1	4	0.2964	0.2464	0.2107	0.2464		2015-07-16
212	1.00,1.00,1.00,1.00,1.00,1.00,1.00,1.00,1.00	55a7f27ea1f68	1.3	1.0000	1	1	0	3	0.3333	0.3333	0.3333			2015-07-16
218	1.00,3.00,3.00,0.33,1.00,1.00,0.33,1.00,1.00	55a7f27ea1f68	1.4	1.0000	1	1	0	3	0.6	0.2	0.2			2015-07-16
189	1.00,4.00,4.00,2.00,3.00,0.25,1.00,2.00,0.50,1.00,0.25,0.50,1.00,0.33,0.33,0.50,2.00,3.00,1.00,1.00,0.33,1.00,3.00,1.00,1.00	55a7f2951d7d9	0	0.8684	1	1	0	5	0.4189	0.128	0.0729	0.209	0.1712	2015-07-16
204	1.00,3.00,1.00,4.00,0.33,1.00,2.00,3.00,1.00,0.50,1.00,2.00,0.25,0.33,0.50,1.00	55a7f2951d7d9	1.0	0.7826	1	1	0	4	0.4075	0.2701	0.2282	0.0942		2015-07-16
226	1.00,3.00,3.00,2.00,0.33,1.00,1.00,1.00,0.33,1.00,1.00,0.50,0.50,1.00,2.00,1.00	55a7f2951d7d9	1.1	0.9467	1	1	0	4	0.4586	0.1714	0.1436	0.2263		2015-07-16
245	1.00,3.00,3.00,1.00,0.33,1.00,2.00,1.00,0.33,0.50,1.00,1.00,1.00,1.00,1.00,1.00	55a7f2951d7d9	1.2	0.7129	1	1	0	4	0.3998	0.2106	0.1522	0.2374		2015-07-16
248	1.00,0.33,0.50,3.00,1.00,1.00,2.00,1.00,1.00	55a7f2951d7d9	1.3	0.9503	1	1	0	3	0.1698	0.4429	0.3873			2015-07-16
251	1.00,1.00,3.00,1.00,1.00,4.00,0.33,0.25,1.00	55a7f2951d7d9	1.4	0.9808	1	1	0	3	0.416	0.4577	0.1263			2015-07-16
179	1.00,4.00,1.00,4.00,0.50,0.25,1.00,1.00,2.00,0.33,1.00,1.00,1.00,3.00,0.33,0.25,0.50,0.33,1.00,0.33,2.00,3.00,3.00,3.00,1.00	55a7f2a7e4515	0	0.7234	1	1	1	5	0.2618	0.1212	0.1699	0.0742	0.3729	2015-07-16
185	1.00,4.00,0.33,1.00,0.25,1.00,3.00,0.25,3.00,0.33,1.00,1.00,1.00,4.00,1.00,1.00	55a7f2a7e4515	1.0	0.1781	0	1	1	4	0.2473	0.1985	0.2756	0.2786		2015-07-16
193	1.00,3.00,0.33,3.00,0.33,1.00,0.33,3.00,3.00,3.00,1.00,4.00,0.33,0.33,0.25,1.00	55a7f2a7e4515	1.1	0.7626	1	1	1	4	0.2675	0.1636	0.4843	0.0846		2015-07-16
202	1.00,3.00,0.33,3.00,0.33,1.00,0.33,3.00,3.00,3.00,1.00,4.00,0.33,0.33,0.25,1.00	55a7f2a7e4515	1.2	0.7626	1	1	1	4	0.2675	0.1636	0.4843	0.0846		2015-07-16
206	1.00,0.25,0.33,4.00,1.00,3.00,3.00,0.33,1.00	55a7f2a7e4515	1.3	0.8770	1	1	1	3	0.1199	0.608	0.2721			2015-07-16
216	1.00,3.00,4.00,0.33,1.00,1.00,0.25,1.00,1.00	55a7f2a7e4515	1.4	0.9808	1	1	1	3	0.6327	0.1924	0.1749			2015-07-16
214	1.00,0.25,2.00,4.00,0.25,4.00,1.00,4.00,4.00,0.25,0.50,0.25,1.00,0.33,0.33,0.25,0.25,3.00,1.00,0.33,4.00,4.00,3.00,3.00,1.00	55a7f2bdc4e80	0	0.4968	0	1	2	5	0.1479	0.2663	0.0705	0.107	0.4083	2015-07-16
235	1.00,4.00,4.00,4.00,0.25,1.00,0.33,4.00,0.25,3.00,1.00,4.00,0.25,0.25,0.25,1.00	55a7f2bdc4e80	1.0	0.6187	1	1	1	4	0.5201	0.1579	0.2483	0.0737		2015-07-16
244	1.00,0.33,0.33,0.33,3.00,1.00,2.00,1.00,3.00,0.50,1.00,2.00,3.00,1.00,0.50,1.00	55a7f2bdc4e80	1.1	0.8412	1	1	0	4	0.0954	0.3514	0.2997	0.2535		2015-07-16
249	1.00,0.50,2.00,2.00,2.00,1.00,2.00,2.00,0.50,0.50,1.00,2.00,0.50,0.50,0.50,1.00	55a7f2bdc4e80	1.2	0.7481	1	1	0	4	0.2748	0.3873	0.1981	0.1397		2015-07-16
253	1.00,2.00,2.00,0.50,1.00,0.50,0.50,2.00,1.00	55a7f2bdc4e80	1.3	0.8227	1	1	0	3	0.4905	0.1976	0.3119			2015-07-16
255	1.00,0.33,2.00,3.00,1.00,2.00,0.50,0.50,1.00	55a7f2bdc4e80	1.4	0.6831	1	1	0	3	0.268	0.5374	0.1946			2015-07-16
217	1.00,3.00,2.00,0.50,1.00,0.33,1.00,0.33,0.50,0.33,0.50,3.00,1.00,1.00,0.33,2.00,2.00,1.00,1.00,0.50,1.00,3.00,3.00,2.00,1.00	55a7f2da602ae	0	0.7210	1	1	1	5	0.2291	0.0806	0.159	0.2149	0.3164	2015-07-16
236	1.00,3.00,1.00,3.00,0.33,1.00,0.33,0.50,1.00,3.00,1.00,1.00,0.33,2.00,1.00,1.00	55a7f2da602ae	1.0	0.8387	1	1	1	4	0.3884	0.1068	0.2975	0.2073		2015-07-16
243	1.00,0.50,0.33,3.00,2.00,1.00,1.00,3.00,3.00,1.00,1.00,3.00,0.33,0.33,0.33,1.00	55a7f2da602ae	1.1	0.8205	1	1	0	4	0.1898	0.3359	0.3754	0.0988		2015-07-16
258	1.00,0.50,0.50,0.33,2.00,1.00,1.00,0.50,2.00,1.00,1.00,0.50,3.00,2.00,2.00,1.00	55a7f2da602ae	1.2	0.9705	1	1	1	4	0.1225	0.2272	0.2272	0.4231		2015-07-16
259	1.00,0.50,0.50,2.00,1.00,0.50,2.00,2.00,1.00	55a7f2da602ae	1.3	0.8227	1	1	1	3	0.1976	0.3119	0.4905			2015-07-16
260	1.00,2.00,1.00,0.50,1.00,0.33,1.00,3.00,1.00	55a7f2da602ae	1.4	0.9503	1	1	0	3	0.3873	0.1698	0.4429			2015-07-16
					0.0775194		0.20155

## Sheet: Matriz_original_Vagos
	PROJETOS-ÂNCORA
						Património natural				Estrutura Urbana				Inclusão social			Qualidade de vida
		1.2. Factores imateriais de apoio à atividade económica (apoio aos setores existentes)	1.3. Formação mão-de-obra (apoio aos setores existentes)	1.4. Factores imateriais de apoio à atividade económica (apoio aos setores existentes)	1.5.Serviços e infraestruturas de apoio à atividade económica	2.1. Prevenção e mitigação de riscos (erosão, incêndios, cheias)	2.2. Utilização para turismo	2.3. Utilização para lazer	2.4. Preservação de ecossistemas / limpeza / embelezamento (qualificação ambiental)	3.1. Acessibilidade e mobilidade	3.2. Identidade territorial	3.3. Património construído	3.4. Qualidade do espaço público	4.1. Serviços de interesse geral (educação, saúde, CTT, etc.)	4.2. Apoio a grupos carenciados e com necessidades especiais	4.3. Inserção socioprofissional	5.1. Desporto e tempos livres	5.2. Cultura	5.3. Participação cívica
		Total	Total	Total	Total	Total	Total	Total	Total	Total	Total	Total	Total	Total	Total	Total	Total	Total	Total
	1. Estratégia de dinamização do tecido económico	3.33333	2.66667	3.33333	4.66667	0.666667	0.333333	0.333333	1	2.33333	1.33333	0	1	0.333333	1	3.33333	0	0.666667	0.333333
	1. Desenvolvimento de setores do futuro	6	2	2	4	1	0	0	1	2	1	0	1	1	1	2	0	0	1
	2. Qualificação e dinamização da indústria	2	4	4	6	0	0	0	0	4	1	0	1	0	1	4	0	0	0
	3. Qualificação e inovação da agricultura	2	2	4	4	1	1	1	2	1	2	0	1	0	1	4	0	2	0
	2. Revitalização urbana	1	0	1.5	1	0	1	1.5	1	2	3	5	6	1	2	0	1.5	3	1
	1. Requalificação de Vagos – Centro da Vila e Frente Lagunar da Ria	1	0	2	1	0	1	2	1	2	4	6	6	1	2	0	2	4	1
	2. Requalificação de outros núcleos urbanos	1	0	1	1	0	1	1	1	2	2	4	6	1	2	0	1	2	1
	3. Qualificação da rede de serviços e equipamentos	0.75	1.75	0.5	0.75	0.25	0	0.5	0.5	2	0.25	0	1	4.5	3.5	1	1.5	1.25	1
	1. Equipamentos e serviços de saúde	1	1	1	1	0	0	1	0	2	0	0	1	6	2	0	1	0	1
	2. Definição do projeto educativo local	2	4	1	1	1	0	1	2	2	1	0	1	6	2	2	4	2	1
	3. Respostas sociais direcionadas	0	1	0	1	0	0	0	0	2	0	0	1	4	6	1	1	2	1
	4. Respostas integradas e programas de apoio complementares	0	1	0	0	0	0	0	0	2	0	0	1	2	4	1	0	1	1
	4. Vagos, território inteligente	2	0.666667	2	1.66667	0.333333	0.666667	0.333333	0	4	1.66667	0	2	4	1.33333	0	0.333333	0	2.66667
	1. Desenvolvimento de um sistema de apoio à decisão	2	1	1	0	1	1	0	0	2	1	0	1	2	1	0	1	0	2
	2. Aproximar a Câmara aos cidadãos	2	1	3	1	0	0	0	0	4	2	0	1	4	1	0	0	0	6
	3. Plano de mobilidade integrado	2	0	2	4	0	1	1	0	6	2	0	4	6	2	0	0	0	0
	5. Vagos sustentável	1	0.666667	1.33333	1	4	1	1	4.66667	0.333333	2.66667	0	2.66667	0	0	1.33333	2	0	1
	1. Defesa da Orla Costeira	1	0	1	1	6	1	1	4	0	2	0	2	0	0	1	1	0	1
	2. Proteção e valorização das zonas lagunares	1	0	1	1	4	1	1	4	1	4	0	4	0	0	1	4	0	0
	3. Sensibilização, qualificação e limpeza do território	1	2	2	1	2	1	1	6	0	2	0	2	0	0	2	1	0	2
	6. Afirmação do turismo	3.33333	2.66667	3.33333	2	0	4.66667	4	1	1.33333	2	1.66667	1.66667	0	0	1	2.66667	2	0
	1. Ações transversais de desenvolvimento do turismo	4	2	4	2	0	4	4	1	2	2	1	2	0	0	1	2	2	0
	2. Segmentos e nichos existentes	2	4	4	2	0	4	4	1	0	2	2	1	0	0	1	2	2	0
	3. Segmentos e nichos de futuro	4	2	2	2	0	6	4	1	2	2	2	2	0	0	1	4	2	0
	7. Viver Vagos	1.5	0.5	1.5	0	0	3	2	0	0	6	1	2	0	1	1	3	5	1
	1. Animação e programação cultural	1	1	1	0	0	2	2	0	0	6	2	4	0	2	2	4	6	2
	2. Plano de comunicação e marketing	2	0	2	0	0	4	2	0	0	6	0	0	0	0	0	2	4	0
		4	4	4	4	4	4	4	4	4	4	4	4	3	3	3	3	3	3
	1. Estratégia de dinamização do tecido económico	0.833333	0.666667	0.833333	1.16667	0.166667	0.0833333	0.0833333	0.25	0.583333	0.333333		0.25	0.111111	0.333333	1.11111		0.222222	0.111111	0.396605		0.412864
	1. Desenvolvimento de setores do futuro	1.5	0.5	0.5	1	0.25			0.25	0.5	0.25		0.25	0.333333	0.333333	0.666667			0.333333	0.37037	0.396605	6.66667	9.14808
	2. Qualificação e dinamização da indústria	0.5	1	1	1.5					1	0.25		0.25		0.333333	1.33333				0.398148	0.396605	7.16667	9.83419
	3. Qualificação e inovação da agricultura	0.5	0.5	1	1	0.25	0.25	0.25	0.5	0.25	0.5		0.25		0.333333	1.33333		0.666667		0.421296	0.396605	7.58333	10.4059
	2. Revitalização urbana	0.25		0.375	0.25		0.25	0.375	0.25	0.5	0.75	1.25	1.5	0.333333	0.666667		0.5	1	0.333333	0.476852			0
	1. Requalificação de Vagos – Centro da Vila e Frente Lagunar da Ria	0.25		0.5	0.25		0.25	0.5	0.25	0.5	1	1.5	1.5	0.333333	0.666667		0.666667	1.33333	0.333333	0.546296	0.476852	9.83333	13.4934
	2. Requalificação de outros núcleos urbanos	0.25		0.25	0.25		0.25	0.25	0.25	0.5	0.5	1	1.5	0.333333	0.666667		0.333333	0.666667	0.333333	0.407407	0.476852	7.33333	10.0629
	3. Qualificação da rede de serviços e equipamentos	0.1875	0.4375	0.125	0.1875	0.0625		0.125	0.125	0.5	0.0625		0.25	1.5	1.16667	0.333333	0.5	0.416667	0.333333	0.350694			0
	1. Equipamentos e serviços de saúde	0.25	0.25	0.25	0.25			0.25		0.5			0.25	2	0.666667		0.333333		0.333333	0.296296	0.350694	5.33333	7.31847
	2. Definição do projeto educativo local	0.5	1	0.25	0.25	0.25		0.25	0.5	0.5	0.25		0.25	2	0.666667	0.666667	1.33333	0.666667	0.333333	0.537037	0.350694	9.66667	13.2647
	3. Respostas sociais direcionadas		0.25		0.25					0.5			0.25	1.33333	2	0.333333	0.333333	0.666667	0.333333	0.347222	0.350694	6.25	8.57633
	4. Respostas integradas e programas de apoio complementares		0.25							0.5			0.25	0.666667	1.33333	0.333333		0.333333	0.333333	0.222222	0.350694	4	5.48885
	4. Vagos, território inteligente	0.5	0.166667	0.5	0.416667	0.0833333	0.166667	0.0833333		1	0.416667		0.5	1.33333	0.444444		0.111111		0.888889	0.367284			0
	1. Desenvolvimento de um sistema de apoio à decisão	0.5	0.25	0.25		0.25	0.25			0.5	0.25		0.25	0.666667	0.333333		0.333333		0.666667	0.25	0.367284	4.5	6.17496
	2. Aproximar a Câmara aos cidadãos	0.5	0.25	0.75	0.25					1	0.5		0.25	1.33333	0.333333				2	0.398148	0.367284	7.16667	9.83419
	3. Plano de mobilidade integrado	0.5		0.5	1		0.25	0.25		1.5	0.5		1	2	0.666667					0.453704	0.367284	8.16667	11.2064
	5. Vagos sustentável	0.25	0.166667	0.333333	0.25	1	0.25	0.25	1.16667	0.0833333	0.666667		0.666667			0.444444	0.666667		0.333333	0.362654			0
	1. Defesa da Orla Costeira	0.25		0.25	0.25	1.5	0.25	0.25	1		0.5		0.5			0.333333	0.333333		0.333333	0.319444	0.362654	5.75	7.89022
	2. Proteção e valorização das zonas lagunares	0.25		0.25	0.25	1	0.25	0.25	1	0.25	1		1			0.333333	1.33333			0.398148	0.362654	7.16667	9.83419
	3. Sensibilização, qualificação e limpeza do território	0.25	0.5	0.5	0.25	0.5	0.25	0.25	1.5		0.5		0.5			0.666667	0.333333		0.666667	0.37037	0.362654	6.66667	9.14808
	6. Afirmação do turismo	0.833333	0.666667	0.833333	0.5		1.16667	1	0.25	0.333333	0.5	0.416667	0.416667			0.333333	0.888889	0.666667		0.489198			0
	1. Ações transversais de desenvolvimento do turismo	1	0.5	1	0.5		1	1	0.25	0.5	0.5	0.25	0.5			0.333333	0.666667	0.666667		0.481481	0.489198	8.66667	11.8925
	2. Segmentos e nichos existentes	0.5	1	1	0.5		1	1	0.25		0.5	0.5	0.25			0.333333	0.666667	0.666667		0.453704	0.489198	8.16667	11.2064
	3. Segmentos e nichos de futuro	1	0.5	0.5	0.5		1.5	1	0.25	0.5	0.5	0.5	0.5			0.333333	1.33333	0.666667		0.532407	0.489198	9.58333	13.1504
	7. Viver Vagos	0.375	0.125	0.375			0.75	0.5			1.5	0.25	0.5		0.333333	0.333333	1	1.66667	0.333333	0.446759			0
	1. Animação e programação cultural	0.25	0.25	0.25			0.5	0.5			1.5	0.5	1		0.666667	0.666667	1.33333	2	0.666667	0.560185	0.446759	10.0833	13.8365
	2. Plano de comunicação e marketing	0.5		0.5			1	0.5			1.5						0.666667	1.33333		0.333333	0.446759	6	8.23328
																						7.2875	10
	1. Estratégia de dinamização do tecido económico
	1. Desenvolvimento de setores do futuro	0.465617	0.131371	0.106078	0.285523	0.0720345			0.0587097	0.182838	0.0535561		0.0628127	0.0895172	0.0799307	0.196521			0.0883026	1.87281
	2. Qualificação e dinamização da indústria	0.144377	0.244411	0.197355	0.398404					0.340163	0.0498196		0.0584304		0.0743541	0.36562				1.87294
	3. Qualificação e inovação da agricultura	0.136444	0.115491	0.186512	0.251009	0.063327	0.0620438	0.0583643	0.103226	0.0803681	0.0941645		0.05522		0.0702687	0.345531		0.157024		1.77899
	2. Revitalização urbana	0		0	0		0	0	0	0	0	0	0	0	0		0	0	0	0
	1. Requalificação de Vagos – Centro da Vila e Frente Lagunar da Ria	0.0632573		0.086469	0.0581854		0.0575285	0.108234	0.0478567	0.149039	0.174623	0.293064	0.307208	0.0729692	0.13031		0.146886	0.291193	0.0719792	2.0588
	2. Requalificação de outros núcleos urbanos	0.0848223		0.0579735	0.0780214		0.0771405	0.0725657	0.0641715	0.199847	0.117077	0.261981	0.411938	0.0978451	0.174734		0.0984802	0.195232	0.0965176	2.08835
	3. Qualificação da rede de serviços e equipamentos	0	0	0	0	0		0	0	0	0		0	0	0	0	0	0	0	0
	1. Equipamentos e serviços de saúde	0.0857745	0.0726024	0.0586243	0.0788972			0.0733803		0.202091			0.069427	0.593661	0.176695		0.0995857		0.0976011	1.60834
	2. Definição do projeto educativo local	0.0946477	0.160226	0.0323445	0.0435295	0.0439282		0.0404857	0.0716049	0.111498	0.0326597		0.0383046	0.327537	0.0974869	0.119843	0.219775	0.108923	0.0538489	1.59664
	3. Respostas sociais direcionadas		0.061954		0.0673256					0.172451			0.0592444	0.337727	0.452339	0.0926783	0.0849798	0.168468	0.0832862	1.58045
	4. Respostas integradas e programas de apoio complementares		0.0968032							0.269454			0.0925693	0.263849	0.471187	0.14481		0.131616	0.130135	1.60042
	4. Vagos, território inteligente	0	0	0	0	0	0	0		0	0		0	0	0		0		0	0
	1. Desenvolvimento de um sistema de apoio à decisão	0.212935	0.0901177	0.0727675		0.0988281	0.0968255			0.250845	0.0734766		0.0861763	0.245627	0.109661		0.123611		0.242295	1.70317
	2. Aproximar a Câmara aos cidadãos	0.133704	0.0565855	0.137074	0.0614917					0.315015	0.0922729		0.0541107	0.308462	0.0688571				0.456415	1.68399
	3. Plano de mobilidade integrado	0.117332		0.0801927	0.215848		0.0533528	0.0501887		0.414662	0.0809742		0.18994	0.406037	0.120851					1.72938
	5. Vagos sustentável	0	0	0	0	0	0	0	0	0	0		0			0	0		0	0
	1. Defesa da Orla Costeira	0.0822722		0.0562306	0.0756757	0.458213	0.0748213	0.070384	0.248969		0.113557		0.133184			0.104173	0.0955194		0.0936158	1.60662
	2. Proteção e valorização das zonas lagunares	0.0660091		0.0451153	0.0607166	0.245091	0.060031	0.0564709	0.199754	0.077761	0.18222		0.213714			0.0835805	0.306551			1.59701
	3. Sensibilização, qualificação e limpeza do território	0.0709598	0.120125	0.0969978	0.0652703	0.131736	0.0645334	0.0607062	0.322104		0.097943		0.114872			0.179698	0.0823855		0.161487	1.56882
	6. Afirmação do turismo	0	0	0	0		0	0	0	0	0	0	0			0	0	0		0
	1. Ações transversais de desenvolvimento do turismo	0.294524	0.124647	0.201298	0.135455		0.26785	0.251966	0.0557048	0.173479	0.10163	0.0568539	0.119196			0.0932312	0.170974	0.169473		2.21628
	2. Segmentos e nichos existentes	0.156278	0.264558	0.213623	0.143748		0.284249	0.267392	0.0591153		0.107852	0.120669	0.0632467			0.0989393	0.181441	0.179849		2.14096
	3. Segmentos e nichos de futuro	0.266352	0.112725	0.0910218	0.122498		0.363345	0.227865	0.0503765	0.156886	0.0919088	0.102831	0.107794			0.0843135	0.309239	0.153263		2.24042
	7. Viver Vagos	0	0	0			0	0			0	0	0		0	0	0	0	0	0
	1. Animação e programação cultural	0.057796	0.0489204	0.0395018			0.105123	0.0988892			0.239321	0.0892539	0.187123		0.119059	0.146362	0.268408	0.399079	0.13153	1.93037
	2. Plano de comunicação e marketing	0.194259		0.13277			0.353332	0.166189			0.402192						0.225538	0.447117		1.92139
	1. Estratégia de dinamização do tecido económico																			0	0
	1. Desenvolvimento de setores do futuro	3.67754	0.878257	0.572632	2.07431	0.305582			0.202986	0.884552	0.151789		0.208794	0.498042	0.397082	1.20016			0.450796	11.5025	100
	2. Qualificação e dinamização da indústria	1.14032	1.63397	1.06536	2.89438					1.64568	0.141199		0.194227		0.369379	2.23286				11.3174	98.3904
	3. Qualificação e inovação da agricultura	1.07767	0.772094	1.00683	1.82357	0.268644	0.257867	0.228188	0.356899	0.388814	0.266882		0.183555		0.349083	2.11018		0.810751		9.90102	86.0769
	2. Revitalização urbana	0		0	0		0	0	0	0	0	0	0	0	0		0	0	0	0	0
	1. Requalificação de Vagos – Centro da Vila e Frente Lagunar da Ria	0.49962		0.466777	0.422714		0.2391	0.423163	0.165463	0.721036	0.494919	0.929313	1.02118	0.405975	0.647357		0.765118	1.5035	0.367463	9.07269	97.5475
	2. Requalificação de outros núcleos urbanos	0.669945		0.312953	0.566821		0.320611	0.283712	0.221871	0.966843	0.33182	0.830749	1.36931	0.544376	0.868047		0.512977	1.00803	0.492735	9.3008	100
	3. Qualificação da rede de serviços e equipamentos	0	0	0	0	0		0	0	0	0		0	0	0	0	0	0	0	0	0
	1. Equipamentos e serviços de saúde	0.677465	0.485369	0.316466	0.573184			0.286897		0.977697			0.23078	3.30292	0.877791		0.518735		0.498266	8.74557	100
	2. Definição do projeto educativo local	0.747548	1.07116	0.174602	0.316239	0.186351		0.158288	0.247571	0.539419	0.0925642		0.127327	1.8223	0.484299	0.731886	1.1448	0.562395	0.274905	8.68165	99.2691
	3. Respostas sociais direcionadas		0.414182		0.489117					0.834301			0.196933	1.879	2.24715	0.565992	0.442654	0.869838	0.425187	8.36435	95.6409
	4. Respostas integradas e programas de apoio complementares		0.647159							1.3036			0.307707	1.46797	2.34078	0.884362		0.679561	0.664355	8.29548	94.8535
	4. Vagos, território inteligente	0	0	0	0	0	0	0		0	0		0	0	0		0		0	0	0
	1. Desenvolvimento de um sistema de apoio à decisão	1.68181	0.602465	0.392813		0.419245	0.402426			1.21357	0.208248		0.286456	1.36658	0.544779		0.64388		1.23695	8.99922	99.1968
	2. Aproximar a Câmara aos cidadãos	1.05602	0.378292	0.73995	0.446734					1.52401	0.261521		0.179868	1.71618	0.342071				2.33006	8.9747	98.9265
	3. Plano de mobilidade integrado	0.92671		0.432896	1.56813		0.221745	0.196224		2.0061	0.229498		0.631373	2.25905	0.600369					9.07209	100
	5. Vagos sustentável	0	0	0	0	0	0	0	0	0	0		0			0	0		0	0	0
	1. Defesa da Orla Costeira	0.649803		0.303544	0.54978	1.94382	0.310973	0.275182	0.860801		0.321844		0.442715			0.636189	0.497555		0.477921	7.27012	96.2955
	2. Proteção e valorização das zonas lagunares	0.521354		0.243541	0.441103	1.03972	0.249501	0.220786	0.690642	0.376201	0.516448		0.710402			0.510431	1.5968			7.11693	94.2663
	3. Sensibilização, qualificação e limpeza do território	0.560455	0.803076	0.523613	0.474185	0.558847	0.268214	0.237345	1.11366		0.277591		0.381841			1.09743	0.429141		0.824414	7.54981	100
	6. Afirmação do turismo	0	0	0	0		0	0	0	0	0	0	0			0	0	0		0	0
	1. Ações transversais de desenvolvimento do turismo	2.32621	0.833306	1.08665	0.98407		1.11324	0.985116	0.192597	0.839279	0.28804	0.180285	0.396215			0.569369	0.89059	0.875028		11.56	100
	2. Segmentos e nichos existentes	1.23432	1.76865	1.15318	1.04432		1.1814	1.04543	0.204389		0.305675	0.382646	0.210237			0.604228	0.945116	0.928601		11.0082	95.2265
	3. Segmentos e nichos de futuro	2.1037	0.753598	0.491354	0.889942		1.51014	0.890888	0.174175	0.759	0.260489	0.326081	0.358316			0.514907	1.61081	0.791329		11.4347	98.9164
	7. Viver Vagos	0	0	0			0	0			0	0	0		0	0	0	0	0	0	0
	1. Animação e programação cultural	0.456485	0.327048	0.213239			0.436915	0.386629			0.678284	0.283027	0.622011		0.591467	0.893842	1.39812	2.06054	0.671476	9.01908	100
	2. Plano de comunicação e marketing	1.5343		0.716719			1.46852	0.649752			1.13989						1.17481	2.30856		8.99255	99.7059
	nivel 1	0.272467	0.272467	0.272467	0.272467	0.157656	0.157656	0.157656	0.157656	0.141672	0.141672	0.141672	0.141672	0.221847	0.221847	0.221847	0.206364	0.206364	0.206364	3.57181
	nivel 2	0.289879	0.245363	0.198124	0.266637	0.269079	0.263626	0.247992	0.219305	0.341482	0.200051	0.223826	0.234628	0.334383	0.298574	0.367043	0.336549	0.333595	0.329842	4.99998	Cobb-D
	nivel 2 normalizado	0.289878	0.245363	0.198123	0.266636	0.269078	0.263626	0.247991	0.219305	0.341486	0.200054	0.223829	0.234631	0.250788	0.22393	0.275282	0.252415	0.2502	0.247385
	nivel 1 * nivel 2 normaliado	0.0789821	0.0668531	0.053982	0.0726495	0.0424217	0.041562	0.0390972	0.0345746	0.0483791	0.0283421	0.0317103	0.0332407	0.0556365	0.0496783	0.0610706	0.0520894	0.0516322	0.0510513
	1. Estratégia de dinamização do tecido económico	3.33333	2.66667	3.33333	4.66667	0.666667	0.333333	0.333333	1	2.33333	1.33333		1	0.333333	1	3.33333		0.666667	0.333333		4.10669		3.71898	1.15982		5.38898
	2. Revitalização urbana	1		1.5	1		1	1.5	1	2	3	5	6	1	2		1.5	3	1		4.60509		5.0344	0.856773
	3. Qualificação da rede de serviços e equipamentos	0.75	1.75	0.5	0.75	0.25		0.5	0.5	2	0.25		1	4.5	3.5	1	1.5	1.25	1		3.75282		3.48514	1.23764
	4. Vagos, território inteligente	2	0.666667	2	1.66667	0.333333	0.666667	0.333333		4	1.66667		2	4	1.33333		0.333333		2.66667		4.19936		4.00922	1.07586
	5. Vagos sustentável	1	0.666667	1.33333	1	4	1	1	4.66667	0.333333	2.66667		2.66667			1.33333	2		1		3.62259		3.95453	1.09073
	6. Afirmação do turismo	3.33333	2.66667	3.33333	2		4.66667	4	1	1.33333	2	1.66667	1.66667			1	2.66667	2			4.98191		5.08757	0.84782
	7. Viver Vagos	1.5	0.5	1.5			3	2			6	1	2		1	1	3	5	1		4.54287		4.90355	0.879636
																							4.31334
	1. Estratégia de dinamização do tecido económico	3.86606	3.09285	3.86606	5.41249	0.773212	0.386606	0.386606	1.15982	2.70624	1.54642		1.15982	0.386606	1.15982	3.86606		0.773212	0.386606		11.0981	4.76302		1.13789
	2. Revitalização urbana	0.856773		1.28516	0.856773		0.856773	1.28516	0.856773	1.71355	2.57032	4.28386	5.14064	0.856773	1.71355		1.28516	2.57032	0.856773		9.19327	3.94551		0.883901
	3. Qualificação da rede de serviços e equipamentos	0.928229	2.16587	0.61882	0.928229	0.30941		0.61882	0.61882	2.47528	0.30941		1.23764	5.56938	4.33174	1.23764	1.85646	1.54705	1.23764		10.8223	4.64464		1.24526
	4. Vagos, território inteligente	2.15171	0.717237	2.15171	1.79309	0.358619	0.717237	0.358619		4.30342	1.79309		2.15171	4.30342	1.43447		0.358619		2.86895		10.527	4.51791		1.07785
	5. Vagos sustentável	1.09073	0.727155	1.45431	1.09073	4.36293	1.09073	1.09073	5.09009	0.363578	2.90862		2.90862			1.45431	2.18147		1.09073		9.20671	3.95128		1.06998
	6. Afirmação do turismo	2.82607	2.26085	2.82607	1.69564		3.95649	3.39128	0.84782	1.13043	1.69564	1.41303	1.41303			0.84782	2.26085	1.69564			9.84159	4.22376		0.83847
	7. Viver Vagos	1.31945	0.439818	1.31945			2.63891	1.75927			5.27782	0.879636	1.75927		0.879636	0.879636	2.63891	4.39818	0.879636		9.31107	3.99607		0.883573
																						4.29174
	1. Estratégia de dinamização do tecido económico	1.12069	0.758871	0.765958	1.44317	0.208055	0.10192	0.0958753	0.254354	0.924134	0.309364		0.272126	0.129275	0.346291	1.41901		0.25794	0.127519		11.3208	100		1.37883
	2. Revitalização urbana	0.24836		0.254621	0.228447		0.225868	0.318709	0.187895	0.585145	0.514196	0.958839	1.20614	0.286491	0.51162		0.432519	0.857446	0.2826		8.86494	78.3068		1.07972
	3. Qualificação da rede de serviços e equipamentos	0.269074	0.531424	0.122603	0.2475	0.0832557		0.153462	0.13571	0.845263	0.0618978		0.290385	1.86231	1.29334	0.454267	0.624789	0.516088	0.408225		10.949	96.7158		1.33355
	4. Vagos, território inteligente	0.623736	0.175984	0.426305	0.478105	0.0964967	0.189083	0.0889346		1.46954	0.358711		0.504852	1.43899	0.428297		0.120693		0.9463		10.6734	94.2813		1.29998
	5. Vagos sustentável	0.316181	0.178417	0.288133	0.29083	1.17397	0.287546	0.270493	1.11628	0.124155	0.581873		0.682445			0.533794	0.73417		0.359769		9.16624	80.9683		1.11642
	6. Afirmação do turismo	0.819217	0.55473	0.559911	0.45212		1.04304	0.841011	0.185931	0.386021	0.339215	0.316273	0.331538			0.311186	0.760888	0.565658			9.98712	88.2193		1.2164
	7. Viver Vagos	0.382482	0.107915	0.261415			0.695686	0.436286			1.05583	0.196885	0.412775		0.262636	0.322864	0.888122	1.46721	0.290141		9.03856	79.8404		1.10086
																								1.21797
		0.272467	0.157656	0.141672	0.221847	0.206364		100	57.8623	51.9962	81.4218	75.7391
		0.289879	0.245363	0.198124	0.266637			100	84.6433	68.347	91.9821
		0.269079	0.263626	0.247992	0.219305			100	97.9736	92.1633	81.5022
		0.341482	0.200051	0.223826	0.234628			100	58.5832	65.5454	68.7088
		0.334383	0.298574	0.367043				91.102	81.3458	100
		0.336549	0.333595	0.329842				100	99.1224	98.0071

## Sheet: Matriz_Soma
	PROJETOS-ÂNCORA
						Património natural				Estrutura Urbana				Inclusão social			Qualidade de vida
		1.2. Factores imateriais de apoio à atividade económica (apoio aos setores existentes)	1.3. Formação mão-de-obra (apoio aos setores existentes)	1.4. Factores imateriais de apoio à atividade económica (apoio aos setores existentes)	1.5.Serviços e infraestruturas de apoio à atividade económica	2.1. Prevenção e mitigação de riscos (erosão, incêndios, cheias)	2.2. Utilização para turismo	2.3. Utilização para lazer	2.4. Preservação de ecossistemas / limpeza / embelezamento (qualificação ambiental)	3.1. Acessibilidade e mobilidade	3.2. Identidade territorial	3.3. Património construído	3.4. Qualidade do espaço público	4.1. Serviços de interesse geral (educação, saúde, CTT, etc.)	4.2. Apoio a grupos carenciados e com necessidades especiais	4.3. Inserção socioprofissional	5.1. Desporto e tempos livres	5.2. Cultura	5.3. Participação cívica
		Total	Total	Total	Total	Total	Total	Total	Total	Total	Total	Total	Total	Total	Total	Total	Total	Total	Total
	1. Estratégia de dinamização do tecido económico	10	8	10	14	2	1	1	3	7	4	0	3	1	3	10	0	2	1
	1. Desenvolvimento de setores do futuro	6	2	2	4	1	0	0	1	2	1	0	1	1	1	2	0	0	1
	2. Qualificação e dinamização da indústria	2	4	4	6	0	0	0	0	4	1	0	1	0	1	4	0	0	0
	3. Qualificação e inovação da agricultura	2	2	4	4	1	1	1	2	1	2	0	1	0	1	4	0	2	0
	2. Revitalização urbana	2	0	3	2	0	2	3	2	4	6	10	12	2	4	0	3	6	2
	1. Requalificação de Vagos – Centro da Vila e Frente Lagunar da Ria	1	0	2	1	0	1	2	1	2	4	6	6	1	2	0	2	4	1
	2. Requalificação de outros núcleos urbanos	1	0	1	1	0	1	1	1	2	2	4	6	1	2	0	1	2	1
	3. Qualificação da rede de serviços e equipamentos	3	7	2	3	1	0	2	2	8	1	0	4	18	14	4	6	5	4
	1. Equipamentos e serviços de saúde	1	1	1	1	0	0	1	0	2	0	0	1	6	2	0	1	0	1
	2. Definição do projeto educativo local	2	4	1	1	1	0	1	2	2	1	0	1	6	2	2	4	2	1
	3. Respostas sociais direcionadas	0	1	0	1	0	0	0	0	2	0	0	1	4	6	1	1	2	1
	4. Respostas integradas e programas de apoio complementares	0	1	0	0	0	0	0	0	2	0	0	1	2	4	1	0	1	1
	4. Vagos, território inteligente	6	2	6	5	1	2	1	0	12	5	0	6	12	4	0	1	0	8
	1. Desenvolvimento de um sistema de apoio à decisão	2	1	1	0	1	1	0	0	2	1	0	1	2	1	0	1	0	2
	2. Aproximar a Câmara aos cidadãos	2	1	3	1	0	0	0	0	4	2	0	1	4	1	0	0	0	6
	3. Plano de mobilidade integrado	2	0	2	4	0	1	1	0	6	2	0	4	6	2	0	0	0	0
	5. Vagos sustentável	3	2	4	3	12	3	3	14	1	8	0	8	0	0	4	6	0	3
	1. Defesa da Orla Costeira	1	0	1	1	6	1	1	4	0	2	0	2	0	0	1	1	0	1
	2. Proteção e valorização das zonas lagunares	1	0	1	1	4	1	1	4	1	4	0	4	0	0	1	4	0	0
	3. Sensibilização, qualificação e limpeza do território	1	2	2	1	2	1	1	6	0	2	0	2	0	0	2	1	0	2
	6. Afirmação do turismo	10	8	10	6	0	14	12	3	4	6	5	5	0	0	3	8	6	0
	1. Ações transversais de desenvolvimento do turismo	4	2	4	2	0	4	4	1	2	2	1	2	0	0	1	2	2	0
	2. Segmentos e nichos existentes	2	4	4	2	0	4	4	1	0	2	2	1	0	0	1	2	2	0
	3. Segmentos e nichos de futuro	4	2	2	2	0	6	4	1	2	2	2	2	0	0	1	4	2	0
	7. Viver Vagos	3	1	3	0	0	6	4	0	0	12	2	4	0	2	2	6	10	2
	1. Animação e programação cultural	1	1	1	0	0	2	2	0	0	6	2	4	0	2	2	4	6	2
	2. Plano de comunicação e marketing	2	0	2	0	0	4	2	0	0	6	0	0	0	0	0	2	4	0
		4	4	4	4	4	4	4	4	4	4	4	4	3	3	3	3	3	3
	1. Estratégia de dinamização do tecido económico	2.5	2	2.5	3.5	0.5	0.25	0.25	0.75	1.75	1		0.75	0.333333	1	3.33333		0.666667	0.333333	1.18981		1.15675
	1. Desenvolvimento de setores do futuro	1.5	0.5	0.5	1	0.25			0.25	0.5	0.25		0.25	0.333333	0.333333	0.666667			0.333333	0.37037	0.396605	6.66667	9.14808
	2. Qualificação e dinamização da indústria	0.5	1	1	1.5					1	0.25		0.25		0.333333	1.33333				0.398148	0.396605	7.16667	9.83419
	3. Qualificação e inovação da agricultura	0.5	0.5	1	1	0.25	0.25	0.25	0.5	0.25	0.5		0.25		0.333333	1.33333		0.666667		0.421296	0.396605	7.58333	10.4059
	2. Revitalização urbana	0.5		0.75	0.5		0.5	0.75	0.5	1	1.5	2.5	3	0.666667	1.33333		1	2	0.666667	0.953704			0
	1. Requalificação de Vagos – Centro da Vila e Frente Lagunar da Ria	0.25		0.5	0.25		0.25	0.5	0.25	0.5	1	1.5	1.5	0.333333	0.666667		0.666667	1.33333	0.333333	0.546296	0.476852	9.83333	13.4934
	2. Requalificação de outros núcleos urbanos	0.25		0.25	0.25		0.25	0.25	0.25	0.5	0.5	1	1.5	0.333333	0.666667		0.333333	0.666667	0.333333	0.407407	0.476852	7.33333	10.0629
	3. Qualificação da rede de serviços e equipamentos	0.75	1.75	0.5	0.75	0.25		0.5	0.5	2	0.25		1	6	4.66667	1.33333	2	1.66667	1.33333	1.40278			0
	1. Equipamentos e serviços de saúde	0.25	0.25	0.25	0.25			0.25		0.5			0.25	2	0.666667		0.333333		0.333333	0.296296	0.350694	5.33333	7.31847
	2. Definição do projeto educativo local	0.5	1	0.25	0.25	0.25		0.25	0.5	0.5	0.25		0.25	2	0.666667	0.666667	1.33333	0.666667	0.333333	0.537037	0.350694	9.66667	13.2647
	3. Respostas sociais direcionadas		0.25		0.25					0.5			0.25	1.33333	2	0.333333	0.333333	0.666667	0.333333	0.347222	0.350694	6.25	8.57633
	4. Respostas integradas e programas de apoio complementares		0.25							0.5			0.25	0.666667	1.33333	0.333333		0.333333	0.333333	0.222222	0.350694	4	5.48885
	4. Vagos, território inteligente	1.5	0.5	1.5	1.25	0.25	0.5	0.25		3	1.25		1.5	4	1.33333		0.333333		2.66667	1.10185			0
	1. Desenvolvimento de um sistema de apoio à decisão	0.5	0.25	0.25		0.25	0.25			0.5	0.25		0.25	0.666667	0.333333		0.333333		0.666667	0.25	0.367284	4.5	6.17496
	2. Aproximar a Câmara aos cidadãos	0.5	0.25	0.75	0.25					1	0.5		0.25	1.33333	0.333333				2	0.398148	0.367284	7.16667	9.83419
	3. Plano de mobilidade integrado	0.5		0.5	1		0.25	0.25		1.5	0.5		1	2	0.666667					0.453704	0.367284	8.16667	11.2064
	5. Vagos sustentável	0.75	0.5	1	0.75	3	0.75	0.75	3.5	0.25	2		2			1.33333	2		1	1.08796			0
	1. Defesa da Orla Costeira	0.25		0.25	0.25	1.5	0.25	0.25	1		0.5		0.5			0.333333	0.333333		0.333333	0.319444	0.362654	5.75	7.89022
	2. Proteção e valorização das zonas lagunares	0.25		0.25	0.25	1	0.25	0.25	1	0.25	1		1			0.333333	1.33333			0.398148	0.362654	7.16667	9.83419
	3. Sensibilização, qualificação e limpeza do território	0.25	0.5	0.5	0.25	0.5	0.25	0.25	1.5		0.5		0.5			0.666667	0.333333		0.666667	0.37037	0.362654	6.66667	9.14808
	6. Afirmação do turismo	2.5	2	2.5	1.5		3.5	3	0.75	1	1.5	1.25	1.25			1	2.66667	2		1.46759			0
	1. Ações transversais de desenvolvimento do turismo	1	0.5	1	0.5		1	1	0.25	0.5	0.5	0.25	0.5			0.333333	0.666667	0.666667		0.481481	0.489198	8.66667	11.8925
	2. Segmentos e nichos existentes	0.5	1	1	0.5		1	1	0.25		0.5	0.5	0.25			0.333333	0.666667	0.666667		0.453704	0.489198	8.16667	11.2064
	3. Segmentos e nichos de futuro	1	0.5	0.5	0.5		1.5	1	0.25	0.5	0.5	0.5	0.5			0.333333	1.33333	0.666667		0.532407	0.489198	9.58333	13.1504
	7. Viver Vagos	0.75	0.25	0.75			1.5	1			3	0.5	1		0.666667	0.666667	2	3.33333	0.666667	0.893519			0
	1. Animação e programação cultural	0.25	0.25	0.25			0.5	0.5			1.5	0.5	1		0.666667	0.666667	1.33333	2	0.666667	0.560185	0.446759	10.0833	13.8365
	2. Plano de comunicação e marketing	0.5		0.5			1	0.5			1.5						0.666667	1.33333		0.333333	0.446759	6	8.23328
																						7.2875	10
	1. Estratégia de dinamização do tecido económico
	1. Desenvolvimento de setores do futuro	0.465617	0.131371	0.106078	0.285523	0.0720345			0.0587097	0.182838	0.0535561		0.0628127	0.0895172	0.0799307	0.196521			0.0883026	1.87281
	2. Qualificação e dinamização da indústria	0.144377	0.244411	0.197355	0.398404					0.340163	0.0498196		0.0584304		0.0743541	0.36562				1.87294
	3. Qualificação e inovação da agricultura	0.136444	0.115491	0.186512	0.251009	0.063327	0.0620438	0.0583643	0.103226	0.0803681	0.0941645		0.05522		0.0702687	0.345531		0.157024		1.77899
	2. Revitalização urbana	0		0	0		0	0	0	0	0	0	0	0	0		0	0	0	0
	1. Requalificação de Vagos – Centro da Vila e Frente Lagunar da Ria	0.0632573		0.086469	0.0581854		0.0575285	0.108234	0.0478567	0.149039	0.174623	0.293064	0.307208	0.0729692	0.13031		0.146886	0.291193	0.0719792	2.0588
	2. Requalificação de outros núcleos urbanos	0.0848223		0.0579735	0.0780214		0.0771405	0.0725657	0.0641715	0.199847	0.117077	0.261981	0.411938	0.0978451	0.174734		0.0984802	0.195232	0.0965176	2.08835
	3. Qualificação da rede de serviços e equipamentos	0	0	0	0	0		0	0	0	0		0	0	0	0	0	0	0	0
	1. Equipamentos e serviços de saúde	0.0857745	0.0726024	0.0586243	0.0788972			0.0733803		0.202091			0.069427	0.593661	0.176695		0.0995857		0.0976011	1.60834
	2. Definição do projeto educativo local	0.0946477	0.160226	0.0323445	0.0435295	0.0439282		0.0404857	0.0716049	0.111498	0.0326597		0.0383046	0.327537	0.0974869	0.119843	0.219775	0.108923	0.0538489	1.59664
	3. Respostas sociais direcionadas		0.061954		0.0673256					0.172451			0.0592444	0.337727	0.452339	0.0926783	0.0849798	0.168468	0.0832862	1.58045
	4. Respostas integradas e programas de apoio complementares		0.0968032							0.269454			0.0925693	0.263849	0.471187	0.14481		0.131616	0.130135	1.60042
	4. Vagos, território inteligente	0	0	0	0	0	0	0		0	0		0	0	0		0		0	0
	1. Desenvolvimento de um sistema de apoio à decisão	0.212935	0.0901177	0.0727675		0.0988281	0.0968255			0.250845	0.0734766		0.0861763	0.245627	0.109661		0.123611		0.242295	1.70317
	2. Aproximar a Câmara aos cidadãos	0.133704	0.0565855	0.137074	0.0614917					0.315015	0.0922729		0.0541107	0.308462	0.0688571				0.456415	1.68399
	3. Plano de mobilidade integrado	0.117332		0.0801927	0.215848		0.0533528	0.0501887		0.414662	0.0809742		0.18994	0.406037	0.120851					1.72938
	5. Vagos sustentável	0	0	0	0	0	0	0	0	0	0		0			0	0		0	0
	1. Defesa da Orla Costeira	0.0822722		0.0562306	0.0756757	0.458213	0.0748213	0.070384	0.248969		0.113557		0.133184			0.104173	0.0955194		0.0936158	1.60662
	2. Proteção e valorização das zonas lagunares	0.0660091		0.0451153	0.0607166	0.245091	0.060031	0.0564709	0.199754	0.077761	0.18222		0.213714			0.0835805	0.306551			1.59701
	3. Sensibilização, qualificação e limpeza do território	0.0709598	0.120125	0.0969978	0.0652703	0.131736	0.0645334	0.0607062	0.322104		0.097943		0.114872			0.179698	0.0823855		0.161487	1.56882
	6. Afirmação do turismo	0	0	0	0		0	0	0	0	0	0	0			0	0	0		0
	1. Ações transversais de desenvolvimento do turismo	0.294524	0.124647	0.201298	0.135455		0.26785	0.251966	0.0557048	0.173479	0.10163	0.0568539	0.119196			0.0932312	0.170974	0.169473		2.21628
	2. Segmentos e nichos existentes	0.156278	0.264558	0.213623	0.143748		0.284249	0.267392	0.0591153		0.107852	0.120669	0.0632467			0.0989393	0.181441	0.179849		2.14096
	3. Segmentos e nichos de futuro	0.266352	0.112725	0.0910218	0.122498		0.363345	0.227865	0.0503765	0.156886	0.0919088	0.102831	0.107794			0.0843135	0.309239	0.153263		2.24042
	7. Viver Vagos	0	0	0			0	0			0	0	0		0	0	0	0	0	0
	1. Animação e programação cultural	0.057796	0.0489204	0.0395018			0.105123	0.0988892			0.239321	0.0892539	0.187123		0.119059	0.146362	0.268408	0.399079	0.13153	1.93037
	2. Plano de comunicação e marketing	0.194259		0.13277			0.353332	0.166189			0.402192						0.225538	0.447117		1.92139
	1. Estratégia de dinamização do tecido económico											Min	Max
	1. Desenvolvimento de setores do futuro	0.988589	0.130744	0.299206	0.365969	0.0883026	100	13.2253	30.266	37.0193	8.93219	0.0883026	0.988589	1	0.0471422	0.234263	0.30842	0	100	14.2428	31.0837	37.7578	10	3.50698	1.52009	1.62724	2.23797	1.60829	31.2229		85.328
	2. Qualificação e dinamização da indústria	0.984548	0	0.448413	0.439974	0	100	0	45.545	44.688	0	0	0.984548	1	0	0.45545	0.44688	0	100	10	50.9905	50.2192	10	3.50698	1.43766	1.74544	2.38415	1.60829	33.7435		92.2165
	3. Qualificação e inovação da agricultura	0.689456	0.286961	0.229753	0.4158	0.157024	100	41.6213	33.3237	60.3084	22.7751	0.157024	0.689456	1	0.244044	0.136597	0.486026	0	100	31.9639	22.2937	53.7423	10	3.50698	1.7267	1.55239	2.42028	1.60829	36.5916		100
	2. Revitalização urbana																							0	0	0	0	0
	1. Requalificação de Vagos – Centro da Vila e Frente Lagunar da Ria	0.207912	0.213619	0.923933	0.203279	0.510058	22.5029	23.1206	100	22.0015	55.2051	0.203279	0.923933	0.00642854	0.0143478	1	0	0.425695	10.5786	11.2913	100	10	48.3126	1.90161	1.46545	1.92019	1.66666	2.22602	19.8524		99.3746
	2. Requalificação de outros núcleos urbanos	0.220817	0.213878	0.990843	0.272579	0.39023	22.2858	21.5854	100	27.5098	39.3836	0.213878	0.990843	0.0089316	0	1	0.0755516	0.226975	10.8038	10	100	16.7996	30.4278	1.91256	1.43766	1.92019	1.86995	2.02345	19.9774		100
	3. Qualificação da rede de serviços e equipamentos																							0	0	0	0	0
	1. Equipamentos e serviços de saúde	0.295898	0.0733803	0.271518	0.770356	0.197187	38.4106	9.5255	35.2457	100	25.5968	0.0733803	0.770356	0.319262	0	0.284282	1	0.177634	38.7336	10	35.5853	100	25.987	2.70833	1.43766	1.65872	2.77776	1.95864	35.1381		86.8795
	2. Definição do projeto educativo local	0.330748	0.156019	0.182462	0.544867	0.382547	60.7025	28.6343	33.4875	100	70.2094	0.156019	0.544867	0.44935	0	0.0680054	1	0.582564	50.4415	10	16.1205	100	62.4307	2.9104	1.43766	1.4827	2.77776	2.34696	40.4446		100
	3. Respostas sociais direcionadas	0.12928	0	0.231695	0.882745	0.336734	14.6452	0	26.2471	100	38.1462	0	0.882745	0.146452	0	0.262471	1	0.381462	23.1807	10	33.6224	100	44.3316	2.35479	1.43766	1.64544	2.77776	2.18687	33.838		83.6651
	4. Respostas integradas e programas de apoio complementares	0.0968032	0	0.362023	0.879846	0.26175	11.0023	0	41.1462	100	29.7496	0	0.879846	0.110023	0	0.411462	1	0.297496	19.9021	10	47.0316	100	36.7746	2.25895	1.43766	1.72556	2.77776	2.10413	32.7537		80.9841
	4. Vagos, território inteligente																							0	0	0	0	0
	1. Desenvolvimento de um sistema de apoio à decisão	0.37582	0.195654	0.410498	0.355289	0.365905	91.5523	47.6625	100	86.5507	89.137	0.195654	0.410498	0.838593	0	1	0.743027	0.792443	85.4733	10	100	76.8724	81.3198	3.36016	1.43766	1.92019	2.62031	2.47854	60.2432		94.1327
	2. Aproximar a Câmara aos cidadãos	0.388854	0	0.461398	0.377319	0.456415	84.2774	0	100	81.7774	98.9201	0	0.461398	0.842774	0	1	0.817774	0.989201	85.8496	10	100	83.5996	99.0281	3.36418	1.43766	1.92019	2.66954	2.58138	63.9981		100
	3. Plano de mobilidade integrado	0.413373	0.103542	0.685576	0.526888	0	60.2957	15.1029	100	76.8534	0	0	0.685576	0.602957	0.151029	1	0.768534	0	64.2661	23.5926	100	79.168	10	3.10896	1.64598	1.92019	2.63747	1.60829	41.6809		65.1283
	5. Vagos sustentável																							0	0	0	0	0
	1. Defesa da Orla Costeira	0.214179	0.852387	0.246742	0.104173	0.189135	25.1269	100	28.9471	12.2213	22.1889	0.104173	0.852387	0.147024	1	0.190545	0	0.113554	23.2322	100	27.1491	10	20.2198	2.35621	2.06686	1.59633	1.66666	1.8598	24.0969		67.6219
	2. Proteção e valorização das zonas lagunares	0.171841	0.561347	0.473695	0.0835805	0.306551	30.6122	100	84.3854	14.8893	54.6099	0.0835805	0.561347	0.184735	1	0.816538	0	0.466693	26.6262	100	83.4884	10	52.0024	2.4454	2.06686	1.87172	1.66666	2.26009	35.6348		100
	3. Sensibilização, qualificação e limpeza do território	0.353353	0.57908	0.212815	0.179698	0.243873	61.0198	100	36.7505	31.0317	42.1139	0.179698	0.57908	0.43481	1	0.0829195	0	0.160685	49.1329	100	17.4628	10	24.4617	2.88963	2.06686	1.49959	1.66666	1.93434	28.874		81.0277
	6. Afirmação do turismo																							0	0	0	0	0
	1. Ações transversais de desenvolvimento do turismo	0.755924	0.575521	0.451159	0.0932312	0.340447	100	76.1348	59.6831	12.3334	45.0372	0.0932312	0.755924	1	0.727773	0.540111	0	0.373047	100	75.4996	58.61	10	43.5742	3.50698	1.97728	1.78022	1.66666	2.1791	44.8331		86.1436
	2. Segmentos e nichos existentes	0.778206	0.610757	0.291768	0.0989393	0.36129	100	78.4827	37.4924	12.7138	46.4261	0.0989393	0.778206	1	0.753486	0.283878	0	0.386227	100	77.8137	35.549	10	44.7604	3.50698	1.98671	1.65848	1.66666	2.19121	42.1998		81.0838
	3. Segmentos e nichos de futuro	0.592596	0.641586	0.45942	0.0843135	0.462502	92.3643	100	71.607	13.1414	72.0872	0.0843135	0.641586	0.91209	1	0.673112	0	0.678641	92.0881	100	70.5801	10	71.0777	3.4291	2.06686	1.82771	1.66666	2.41063	52.0447		100
	7. Viver Vagos																							0	0	0	0	0
	1. Animação e programação cultural	0.146218	0.204013	0.515698	0.265422	0.799017	18.2998	25.5329	64.5415	33.2185	100	0.146218	0.799017	0	0.0885332	0.565993	0.182603	1	10	17.968	60.9393	26.4343	100	1.87269	1.57681	1.79007	2.06778	2.58659	28.2714		61.6554
	2. Plano de comunicação e marketing	0.327029	0.51952	0.402192	0	0.672654	48.6176	77.2344	59.7917	0	100	0	0.672654	0.486176	0.772344	0.597917	0	1	53.7559	79.5109	63.8126	10	100	2.96131	1.99348	1.80179	1.66666	2.58659	45.8539		100
	1. Estratégia de dinamização do tecido económico																			0	0
	1. Desenvolvimento de setores do futuro	3.67754	0.878257	0.572632	2.07431	0.305582			0.202986	0.884552	0.151789		0.208794	0.498042	0.397082	1.20016			0.450796	11.5025	100
	2. Qualificação e dinamização da indústria	1.14032	1.63397	1.06536	2.89438					1.64568	0.141199		0.194227		0.369379	2.23286				11.3174	98.3904
	3. Qualificação e inovação da agricultura	1.07767	0.772094	1.00683	1.82357	0.268644	0.257867	0.228188	0.356899	0.388814	0.266882		0.183555		0.349083	2.11018		0.810751		9.90102	86.0769
	2. Revitalização urbana	0		0	0		0	0	0	0	0	0	0	0	0		0	0	0	0	0
	1. Requalificação de Vagos – Centro da Vila e Frente Lagunar da Ria	0.49962		0.466777	0.422714		0.2391	0.423163	0.165463	0.721036	0.494919	0.929313	1.02118	0.405975	0.647357		0.765118	1.5035	0.367463	9.07269	97.5475
	2. Requalificação de outros núcleos urbanos	0.669945		0.312953	0.566821		0.320611	0.283712	0.221871	0.966843	0.33182	0.830749	1.36931	0.544376	0.868047		0.512977	1.00803	0.492735	9.3008	100
	3. Qualificação da rede de serviços e equipamentos	0	0	0	0	0		0	0	0	0		0	0	0	0	0	0	0	0	0
	1. Equipamentos e serviços de saúde	0.677465	0.485369	0.316466	0.573184			0.286897		0.977697			0.23078	3.30292	0.877791		0.518735		0.498266	8.74557	100
	2. Definição do projeto educativo local	0.747548	1.07116	0.174602	0.316239	0.186351		0.158288	0.247571	0.539419	0.0925642		0.127327	1.8223	0.484299	0.731886	1.1448	0.562395	0.274905	8.68165	99.2691
	3. Respostas sociais direcionadas		0.414182		0.489117					0.834301			0.196933	1.879	2.24715	0.565992	0.442654	0.869838	0.425187	8.36435	95.6409
	4. Respostas integradas e programas de apoio complementares		0.647159							1.3036			0.307707	1.46797	2.34078	0.884362		0.679561	0.664355	8.29548	94.8535
	4. Vagos, território inteligente	0	0	0	0	0	0	0		0	0		0	0	0		0		0	0	0
	1. Desenvolvimento de um sistema de apoio à decisão	1.68181	0.602465	0.392813		0.419245	0.402426			1.21357	0.208248		0.286456	1.36658	0.544779		0.64388		1.23695	8.99922	99.1968
	2. Aproximar a Câmara aos cidadãos	1.05602	0.378292	0.73995	0.446734					1.52401	0.261521		0.179868	1.71618	0.342071				2.33006	8.9747	98.9265
	3. Plano de mobilidade integrado	0.92671		0.432896	1.56813		0.221745	0.196224		2.0061	0.229498		0.631373	2.25905	0.600369					9.07209	100
	5. Vagos sustentável	0	0	0	0	0	0	0	0	0	0		0			0	0		0	0	0
	1. Defesa da Orla Costeira	0.649803		0.303544	0.54978	1.94382	0.310973	0.275182	0.860801		0.321844		0.442715			0.636189	0.497555		0.477921	7.27012	96.2955
	2. Proteção e valorização das zonas lagunares	0.521354		0.243541	0.441103	1.03972	0.249501	0.220786	0.690642	0.376201	0.516448		0.710402			0.510431	1.5968			7.11693	94.2663
	3. Sensibilização, qualificação e limpeza do território	0.560455	0.803076	0.523613	0.474185	0.558847	0.268214	0.237345	1.11366		0.277591		0.381841			1.09743	0.429141		0.824414	7.54981	100
	6. Afirmação do turismo	0	0	0	0		0	0	0	0	0	0	0			0	0	0		0	0
	1. Ações transversais de desenvolvimento do turismo	2.32621	0.833306	1.08665	0.98407		1.11324	0.985116	0.192597	0.839279	0.28804	0.180285	0.396215			0.569369	0.89059	0.875028		11.56	100
	2. Segmentos e nichos existentes	1.23432	1.76865	1.15318	1.04432		1.1814	1.04543	0.204389		0.305675	0.382646	0.210237			0.604228	0.945116	0.928601		11.0082	95.2265
	3. Segmentos e nichos de futuro	2.1037	0.753598	0.491354	0.889942		1.51014	0.890888	0.174175	0.759	0.260489	0.326081	0.358316			0.514907	1.61081	0.791329		11.4347	98.9164
	7. Viver Vagos	0	0	0			0	0			0	0	0		0	0	0	0	0	0	0
	1. Animação e programação cultural	0.456485	0.327048	0.213239			0.436915	0.386629			0.678284	0.283027	0.622011		0.591467	0.893842	1.39812	2.06054	0.671476	9.01908	100
	2. Plano de comunicação e marketing	1.5343		0.716719			1.46852	0.649752			1.13989						1.17481	2.30856		8.99255	99.7059
	nivel 1	0.272467	0.272467	0.272467	0.272467	0.157656	0.157656	0.157656	0.157656	0.141672	0.141672	0.141672	0.141672	0.221847	0.221847	0.221847	0.206364	0.206364	0.206364	3.57181
	nivel 2	0.289879	0.245363	0.198124	0.266637	0.269079	0.263626	0.247992	0.219305	0.341482	0.200051	0.223826	0.234628	0.334383	0.298574	0.367043	0.336549	0.333595	0.329842	4.99998	Cobb-D
	nivel 2 normalizado	0.289878	0.245363	0.198123	0.266636	0.269078	0.263626	0.247991	0.219305	0.341486	0.200054	0.223829	0.234631	0.250788	0.22393	0.275282	0.252415	0.2502	0.247385
	nivel 1 * nivel 2 normaliado	0.0789821	0.0668531	0.053982	0.0726495	0.0424217	0.041562	0.0390972	0.0345746	0.0483791	0.0283421	0.0317103	0.0332407	0.0556365	0.0496783	0.0610706	0.0520894	0.0516322	0.0510513
	1. Estratégia de dinamização do tecido económico	10	8	10	14	2	1	1	3	7	4		3	1	3	10		2	1		12.3202		3.71898	1.15982		5.38898
	2. Revitalização urbana	2		3	2		2	3	2	4	6	10	12	2	4		3	6	2		9.21022		5.0344	0.856773
	3. Qualificação da rede de serviços e equipamentos	3	7	2	3	1		2	2	8	1		4	18	14	4	6	5	4		15.0114		3.48514	1.23764
	4. Vagos, território inteligente	6	2	6	5	1	2	1		12	5		6	12	4		1		8		12.5981		4.00922	1.07586
	5. Vagos sustentável	3	2	4	3	12	3	3	14	1	8		8			4	6		3		10.8678		3.95453	1.09073
	6. Afirmação do turismo	10	8	10	6		14	12	3	4	6	5	5			3	8	6			14.9458		5.08757	0.84782
	7. Viver Vagos	3	1	3			6	4			12	2	4		2	2	6	10	2		9.08578		4.90355	0.879636
																							4.31334
	1. Estratégia de dinamização do tecido económico	11.5982	9.27855	11.5982	16.2375	2.31964	1.15982	1.15982	3.47946	8.11873	4.63927		3.47946	1.15982	3.47946	11.5982		2.31964	1.15982		11.5195	14.2892		1.13789
	2. Revitalização urbana	1.71355		2.57032	1.71355		1.71355	2.57032	1.71355	3.42709	5.14064	8.56773	10.2813	1.71355	3.42709		2.57032	5.14064	1.71355		6.36155	7.89106		0.883901
	3. Qualificação da rede de serviços e equipamentos	3.71292	8.66347	2.47528	3.71292	1.23764		2.47528	2.47528	9.90111	1.23764		4.95056	22.2775	17.3269	4.95056	7.42584	6.1882	4.95056		14.9776	18.5787		1.24526
	4. Vagos, território inteligente	6.45514	2.15171	6.45514	5.37928	1.07586	2.15171	1.07586		12.9103	5.37928		6.45514	12.9103	4.30342		1.07586		8.60685		10.9267	13.5538		1.07785
	5. Vagos sustentável	3.2722	2.18147	4.36293	3.2722	13.0888	3.2722	3.2722	15.2703	1.09073	8.72586		8.72586			4.36293	6.5444		3.2722		9.55629	11.8539		1.06998
	6. Afirmação do turismo	8.4782	6.78256	8.4782	5.08692		11.8695	10.1738	2.54346	3.39128	5.08692	4.2391	4.2391			2.54346	6.78256	5.08692			10.2153	12.6713		0.83847
	7. Viver Vagos	2.63891	0.879636	2.63891			5.27782	3.51855			10.5556	1.75927	3.51855		1.75927	1.75927	5.27782	8.79636	1.75927		6.44306	7.99217		0.883573
																						12.4043
	1. Estratégia de dinamização do tecido económico	3.36207	2.27661	2.29788	4.32951	0.624166	0.305759	0.287626	0.763063	2.7724	0.928093		0.816378	0.387824	1.03887	4.25703		0.77382	0.382557		11.7085	77.5467		4.13652
	2. Revitalização urbana	0.496721		0.509241	0.456894		0.451736	0.637419	0.37579	1.17029	1.02839	1.91768	2.41228	0.572981	1.02324		0.865038	1.71489	0.565199		6.11237	40.4828		2.15945
	3. Qualificação da rede de serviços e equipamentos	1.0763	2.1257	0.490411	0.990001	0.333023		0.613849	0.542842	3.38105	0.247591		1.16154	7.44923	5.17337	1.81707	2.49916	2.06435	1.6329		15.0987	100		5.33423
	4. Vagos, território inteligente	1.87121	0.527951	1.27892	1.43431	0.28949	0.567248	0.266804		4.40863	1.07613		1.51456	4.31698	1.28489		0.362078		2.8389		11.039	73.112		3.89996
	5. Vagos sustentável	0.948542	0.535251	0.8644	0.872489	3.52192	0.862638	0.81148	3.34885	0.372466	1.74562		2.04733			1.60138	2.20251		1.07931		9.4802	62.7882		3.34927
	6. Afirmação do turismo	2.45765	1.66419	1.67973	1.35636		3.12911	2.52303	0.557794	1.15806	1.01765	0.948819	0.994613			0.933559	2.28266	1.69697			10.3292	68.4112		3.64921
	7. Viver Vagos	0.764964	0.21583	0.52283			1.39137	0.872571			2.11167	0.39377	0.82555		0.525273	0.645728	1.77624	2.93443	0.580282		6.23208	41.2757		2.20174
																								3.53291
		0.272467	0.157656	0.141672	0.221847	0.206364		100	57.8623	51.9962	81.4218	75.7391
		0.289879	0.245363	0.198124	0.266637			100	84.6433	68.347	91.9821
		0.269079	0.263626	0.247992	0.219305			100	97.9736	92.1633	81.5022
		0.341482	0.200051	0.223826	0.234628			100	58.5832	65.5454	68.7088
		0.334383	0.298574	0.367043				91.102	81.3458	100
		0.336549	0.333595	0.329842				100	99.1224	98.0071
